# Supplementary material for: GATA2 monoallelic expression underlies reduced penetrance in inherited GATA2-mutated MDS/AML
Source: PubMed Central journal article supplement (PMC6224398; doi:10.1038/s41375-018-0134-9), 2018-04-19
Supplement: 41375_2018_134_MOESM2_ESM.pdf [file 41375_2018_134_MOESM2_ESM.pdf]

**Table S2. List of 2,432 differentially expressed (DE) genes between GATA2 biallelic (green) and monoallelic (blue) groups**

| ID              | Name     | Description                                                                                        | log2FC (Bi_vs Mono_allelic) | logCPM      | LR          | PValue   | FDR      | GATA2 Monoallelic group |             | GATA2 Biallelic group |              | BM_control  |
|-----------------|----------|----------------------------------------------------------------------------------------------------|-----------------------------|-------------|-------------|----------|----------|-------------------------|-------------|-----------------------|--------------|-------------|
|                 |          |                                                                                                    |                             |             |             |          |          | IV.10_yr.1              | IV.10_yr.3  | IV.10_yr.4            | III.7_asym   |             |
| ENSG00000112077 | RHAG     | Rh-associated glycoprotein [Source:HGNC Symbol;Acc:10006]                                          | -7.065450382                | 5.860144216 | 250.1161537 | 2.45E-56 | 4.30E-52 | 6.93698598              | 7.148898694 | -0.82139248           | -1.572251189 | 4.628306871 |
| ENSG00000107562 | CXCL12   | chemokine (C-X-C motif) ligand 12 [Source:HGNC Symbol;Acc:10672]                                   | -8.330878237                | 6.904575843 | 221.365128  | 4.56E-50 | 4.00E-46 | 8.463534146             | 7.896112965 | -2.073364206          | -0.956081001 | 2.751827722 |
| ENSG00000169877 | AHSP     | alpha hemoglobin stabilizing protein [Source:HGNC Symbol;Acc:18075]                                | -7.680771874                | 6.64991784  | 218.0163748 | 2.45E-49 | 1.43E-45 | 7.868211149             | 7.83620084  | 0.505333341           | -1.854339469 | 5.243726669 |
| ENSG00000163554 | SPTA1    | spectrin, alpha, erythrocytic 1 (elliptocytosis 2) [Source:HGNC Symbol;Acc:11272]                  | -6.718271315                | 6.277401811 | 211.6474111 | 6.00E-48 | 2.64E-44 | 6.962770807             | 7.687236572 | -0.589913612          | 0.154058352  | 5.777640584 |
| ENSG00000223609 | HBD      | hemoglobin, delta [Source:HGNC Symbol;Acc:4829]                                                    | -6.948481557                | 7.476636825 | 209.3272706 | 1.93E-47 | 6.76E-44 | 8.65012583              | 8.713064225 | 1.855590689           | 0.984547783  | 5.982087099 |
| ENSG00000196415 | PRTN3    | proteinase 3 [Source:HGNC Symbol;Acc:9495]                                                         | -6.967317693                | 6.019308576 | 198.8586812 | 3.71E-45 | 1.08E-41 | 6.122897312             | 6.891813193 | -2.073364206          | -1.133744865 | 7.075716419 |
| ENSG00000197993 | KEL      | Kell blood group, metallo-endopeptidase [Source:HGNC Symbol;Acc:6308]                              | -6.10505537                 | 5.103502598 | 194.5611546 | 3.21E-44 | 8.06E-41 | 6.075729559             | 6.416350763 | -0.907612816          | -0.874832399 | 4.138027348 |
| ENSG00000143627 | PKLR     | pyruvate kinase, liver and RBC [Source:HGNC Symbol;Acc:9020]                                       | -7.880567753                | 4.966265406 | 188.39622   | 7.12E-43 | 1.56E-39 | 6.184539705             | 6.111783523 | -2.845623393          | -7.002070102 | 3.799873749 |
| ENSG00000170180 | GYPA     | glycophorin A (MNS blood group) [Source:HGNC Symbol;Acc:4702]                                      | -7.67602921                 | 5.312758052 | 187.8619216 | 9.31E-43 | 1.82E-39 | 6.067486521             | 6.812344661 | -3.766908349          | -2.97427061  | 4.224973246 |
| ENSG00000197561 | ELANE    | elastase, neutrophil expressed [Source:HGNC Symbol;Acc:3309]                                       | -6.023520652                | 5.626150861 | 183.3194363 | 9.13E-42 | 1.60E-38 | 5.682950487             | 6.155375067 | -1.57307192           | -0.406691783 | 6.942114908 |
| ENSG00000055118 | KCNH2    | potassium voltage-gated channel, subfamily H (eag-related), member 2 [Source:HGNC Symbol;Acc:6251] | -5.924295794                | 6.923850092 | 181.6691407 | 2.09E-41 | 3.34E-38 | 8.16572184              | 8.025555626 | 2.330744516           | 1.508271876  | 5.67656232  |
| ENSG00000131747 | TOP2A    | topoisomerase (DNA) II alpha 170kDa [Source:HGNC Symbol;Acc:11989]                                 | -5.305849613                | 6.626103217 | 178.9653596 | 8.15E-41 | 1.19E-37 | 7.516881607             | 7.660910295 | 2.1289755             | 1.926103707  | 6.641917567 |
| ENSG00000100448 | CTSG     | cathepsin G [Source:HGNC Symbol;Acc:2532]                                                          | -6.007947553                | 4.87429023  | 164.0906188 | 1.45E-37 | 1.95E-34 | 5.426778226             | 5.465512461 | -2.845623393          | -0.874832399 | 5.870464764 |
| ENSG00000166947 | EPB42    | erythrocyte membrane protein band 4.2 [Source:HGNC Symbol;Acc:3381]                                | -5.874982473                | 5.431230207 | 160.912567  | 7.15E-37 | 8.96E-34 | 6.346024108             | 6.732915862 | 0.832340008           | -1.449512048 | 4.673975502 |
| ENSG00000211951 | IGHV2-26 | immunoglobulin heavy variable 2-26 [Source:HGNC Symbol;Acc:5575]                                   | -5.975286828                | 4.456068793 | 156.1900471 | 7.69E-36 | 9.00E-33 | 5.80861299              | 5.379702666 | -0.740035668          | -1.449512048 | 3.430160334 |
| ENSG00000211950 | IGHV1-24 | immunoglobulin heavy variable 1-24 [Source:HGNC Symbol;Acc:5551]                                   | -6.106323229                | 5.519851109 | 154.179973  | 2.12E-35 | 2.32E-32 | 7.02191272              | 6.079121061 | 0.401591237           | -0.589083246 | 4.886100463 |
| ENSG00000126787 | DLGAP5   | discs, large (Drosophila) homolog-associated protein 5 [Source:HGNC Symbol;Acc:16864]              | -5.030396722                | 4.916172395 | 151.7018599 | 7.36E-35 | 7.60E-32 | 6.028383742             | 5.949930118 | 0.365283811           | 0.114810932  | 4.405023371 |
| ENSG00000039068 | CDH1     | cadherin 1, type 1, E-cadherin (epithelial) [Source:HGNC Symbol;Acc:1748]                          | -5.211476345                | 5.007048086 | 151.170497  | 9.62E-35 | 9.38E-32 | 6.306294485             | 6.123695506 | 0.036330944           | 0.642123966  | 3.168221511 |
| ENSG00000243290 | IGKV1-12 | immunoglobulin kappa variable 1-12 [Source:HGNC Symbol;Acc:5730]                                   | -6.1006739                  | 5.961036193 | 149.0565118 | 2.79E-34 | 2.58E-31 | 7.514104155             | 6.586960424 | 1.098750223           | -0.099242291 | 4.866565467 |
| ENSG00000105610 | KLF1     | Kruppel-like factor 1 (erythroid) [Source:HGNC Symbol;Acc:6345]                                    | -5.893335408                | 5.483139827 | 148.7154177 | 3.31E-34 | 2.90E-31 | 6.696714221             | 6.563538635 | -0.66302287           | 0.940331404  | 4.488333455 |
| ENSG00000168754 | FAM178B  | family with sequence similarity 178, member B [Source:HGNC Symbol;Acc:28036]                       | -5.635000879                | 4.527501921 | 146.0502752 | 1.27E-33 | 1.06E-30 | 5.687439991             | 5.669431044 | -0.99931534           | -1.854339469 | 3.557451401 |
| ENSG00000088325 | TPX2     | TPX2, microtubule-associated [Source:HGNC Symbol;Acc:1249]                                         | -4.530458654                | 5.615112454 | 144.8830773 | 2.28E-33 | 1.82E-30 | 6.672460965             | 6.601088773 | 1.89432737            | 1.820287937  | 5.263777731 |
| ENSG00000231007 | CDC20P1  | cell division cycle 20 pseudogene 1 [Source:HGNC Symbol;Acc:29487]                                 | -4.914837736                | 4.76963257  | 143.8082952 | 3.91E-33 | 2.99E-30 | 5.992551784             | 5.715811808 | 0.663204908           | 0.466186565  | 4.077008772 |
| ENSG00000100336 | APOL4    | apolipoprotein L 4 [Source:HGNC Symbol;Acc:14867]                                                  | -5.404204325                | 4.551292878 | 141.9318706 | 1.01E-32 | 7.36E-30 | 5.907365734             | 5.659645999 | -0.059127673          | -0.956081001 | 2.276968566 |
| ENSG00000196188 | CTSE     | cathepsin E [Source:HGNC Symbol;Acc:2530]                                                          | -7.240018267                | 4.396196948 | 141.7465507 | 1.10E-32 | 7.76E-30 | 5.275162165             | 5.882824592 | -4.621297774          | -3.360122781 | 2.814341322 |
| ENSG00000206177 | HBM      | hemoglobin, mu [Source:HGNC Symbol;Acc:4826]                                                       | -6.018993929                | 4.307945359 | 139.7225011 | 3.06E-32 | 2.07E-29 | 5.402953745             | 5.522410173 | -1.886652327          | -3.360122781 | 3.32911422  |
| ENSG00000075340 | ADD2     | adducin 2 (beta) [Source:HGNC Symbol;Acc:244]                                                      | -4.937267494                | 6.496103826 | 138.9965122 | 4.41E-32 | 2.87E-29 | 7.586318744             | 7.695839822 | 3.149202463           | 2.116960417  | 5.257541658 |
| ENSG00000152078 | TMEM56   | transmembrane protein 56 [Source:HGNC Symbol;Acc:26477]                                            | -5.101636196                | 4.71092014  | 138.7745449 | 4.93E-32 | 3.09E-29 | 5.604410474             | 5.996020807 | -0.907612816          | 0.192266291  | 4.039700715 |
| ENSG00000117724 | CENPF    | centromere protein F, 350/400kDa [Source:HGNC Symbol;Acc:1857]                                     | -4.399528673                | 5.736076703 | 137.1273625 | 1.13E-31 | 6.85E-29 | 6.447442448             | 6.927587689 | 2.439516168           | 1.65228493   | 5.60272092  |
| ENSG00000211937 | IGHV2-5  | immunoglobulin heavy variable 2-5 [Source:HGNC Symbol;Acc:5576]                                    | -5.788759437                | 5.939255855 | 134.1804102 | 4.99E-31 | 2.92E-28 | 7.429800935             | 6.439885712 | 1.32354911            | -0.053815412 | 5.453583221 |

|                 |           |                                                                                                   |              |             |             |          |          |             |             |              |              |             |
|-----------------|-----------|---------------------------------------------------------------------------------------------------|--------------|-------------|-------------|----------|----------|-------------|-------------|--------------|--------------|-------------|
| ENSG00000106327 | TFR2      | transferrin receptor 2 [Source:HGNC Symbol;Acc:11762]                                             | -4.481451745 | 5.885401724 | 133.6098056 | 6.65E-31 | 3.77E-28 | 7.090637976 | 6.929964021 | 2.213098418  | 2.444318394  | 4.750573979 |
| ENSG00000211976 | IGHV3-73  | immunoglobulin heavy variable 3-73 [Source:HGNC Symbol;Acc:5623]                                  | -5.977982213 | 4.370701467 | 133.277693  | 7.86E-31 | 4.31E-28 | 5.707913644 | 4.960776417 | -0.907612816 | -2.0191864   | 4.245284812 |
| ENSG00000070182 | SPTB      | spectrin, beta, erythrocytic [Source:HGNC Symbol;Acc:11274]                                       | -5.06884676  | 6.533225014 | 131.0570654 | 2.41E-30 | 1.28E-27 | 7.358959289 | 7.907182372 | 1.992811462  | 2.913229148  | 5.54701189  |
| ENSG00000089685 | BIRC5     | baculoviral IAP repeat containing 5 [Source:HGNC Symbol;Acc:593]                                  | -4.706392021 | 4.794704565 | 130.3419074 | 3.45E-30 | 1.78E-27 | 5.988191525 | 5.74232305  | 0.632982468  | 0.871357159  | 4.175555295 |
| ENSG00000171848 | RRM2      | ribonucleotide reductase M2 [Source:HGNC Symbol;Acc:10452]                                        | -4.716374845 | 4.868285637 | 130.0210308 | 4.05E-30 | 2.03E-27 | 5.74111579  | 5.914026378 | 0.437007322  | 1.0274492    | 4.835083695 |
| ENSG00000224650 | IGHV3-74  | immunoglobulin heavy variable 3-74 [Source:HGNC Symbol;Acc:5624]                                  | -6.031477531 | 6.188290177 | 127.690626  | 1.31E-29 | 6.40E-27 | 7.652107473 | 6.825167815 | 1.582674799  | -0.244792505 | 5.521776442 |
| ENSG00000211955 | IGHV3-33  | immunoglobulin heavy variable 3-33 [Source:HGNC Symbol;Acc:5596]                                  | -5.498740846 | 6.76309439  | 127.524157  | 1.43E-29 | 6.77E-27 | 8.195182702 | 7.439582655 | 2.56847448   | 1.224680533  | 6.084985712 |
| ENSG00000029534 | ANK1      | ankyrin 1, erythrocytic [Source:HGNC Symbol;Acc:492]                                              | -4.600610294 | 7.190314099 | 125.9028035 | 3.23E-29 | 1.49E-26 | 8.135482519 | 8.422533838 | 4.002557365  | 3.60780319   | 6.273554241 |
| ENSG00000145386 | CCNA2     | cyclin A2 [Source:HGNC Symbol;Acc:1578]                                                           | -4.223280231 | 5.109739121 | 125.4877299 | 3.98E-29 | 1.79E-26 | 6.14264935  | 6.075445827 | 1.718398126  | 1.679439471  | 4.794309386 |
| ENSG00000087085 | ACHE      | acetylcholinesterase (Yt blood group) [Source:HGNC Symbol;Acc:108]                                | -7.198916317 | 3.948520864 | 125.3590074 | 4.25E-29 | 1.86E-26 | 5.209254361 | 5.069467156 | -3.23942493  | -7.002070102 | 2.625803327 |
| ENSG00000211962 | IGHV1-46  | immunoglobulin heavy variable 1-46 [Source:HGNC Symbol;Acc:5554]                                  | -5.149202982 | 5.577620398 | 124.6197427 | 6.16E-29 | 2.64E-26 | 6.847949113 | 6.07973269  | 1.517996407  | 0.265774258  | 5.689591224 |
| ENSG00000148773 | MKI67     | marker of proliferation Ki-67 [Source:HGNC Symbol;Acc:7107]                                       | -4.443278622 | 6.563786166 | 124.4026338 | 6.88E-29 | 2.87E-26 | 7.167208233 | 7.688039042 | 2.694908712  | 2.952717131  | 6.761762231 |
| ENSG00000211943 | IGHV3-15  | immunoglobulin heavy variable 3-15 [Source:HGNC Symbol;Acc:5582]                                  | -5.790594543 | 6.582280331 | 124.1677086 | 7.74E-29 | 3.16E-26 | 8.142366367 | 7.174606224 | 2.139763053  | 0.74852395   | 5.514472885 |
| ENSG00000251546 | IGKV1D-39 | immunoglobulin kappa variable 1D-39 [Source:HGNC Symbol;Acc:5756]                                 | -5.685442172 | 4.381892865 | 124.0653229 | 8.15E-29 | 3.25E-26 | 5.793699085 | 5.039598485 | -0.329705368 | -1.572251189 | 3.853782901 |
| ENSG00000211935 | IGHV1-3   | immunoglobulin heavy variable 1-3 [Source:HGNC Symbol;Acc:5552]                                   | -5.403444604 | 4.774582821 | 122.9818688 | 1.41E-28 | 5.49E-26 | 6.118249329 | 5.236752175 | 0.168628767  | -0.7248947   | 4.790858932 |
| ENSG00000256269 | HMBS      | hydroxymethylbilane synthase [Source:HGNC Symbol;Acc:4982]                                        | -3.933682296 | 6.261220124 | 119.4150459 | 8.50E-28 | 3.24E-25 | 7.182237296 | 7.42906119  | 3.506736406  | 3.310628593  | 5.469857628 |
| ENSG00000211625 | IGKV3D-20 | immunoglobulin kappa variable 3D-20 [Source:HGNC Symbol;Acc:5825]                                 | -5.894485247 | 4.736654206 | 119.0692967 | 1.01E-27 | 3.78E-25 | 6.209726581 | 5.267142457 | 0.036330944  | -1.854339469 | 4.262825839 |
| ENSG00000134057 | CCNB1     | cyclin B1 [Source:HGNC Symbol;Acc:1579]                                                           | -4.254122795 | 5.314783612 | 118.6254601 | 1.26E-27 | 4.63E-25 | 6.504021016 | 6.211707004 | 1.919585805  | 1.992567844  | 4.703637394 |
| ENSG00000244437 | IGKV3-15  | immunoglobulin kappa variable 3-15 [Source:HGNC Symbol;Acc:5816]                                  | -4.922634747 | 6.635197635 | 118.4795024 | 1.36E-27 | 4.88E-25 | 8.09752888  | 7.127465328 | 2.5886897    | 2.240618578  | 6.175088092 |
| ENSG00000225698 | IGHV3-72  | immunoglobulin heavy variable 3-72 [Source:HGNC Symbol;Acc:5622]                                  | -6.038438007 | 4.730664592 | 118.4069875 | 1.41E-27 | 4.96E-25 | 6.280970415 | 5.36170963  | 0.036330944  | -2.205328685 | 3.62489131  |
| ENSG00000072571 | HMMR      | hyaluronan-mediated motility receptor (RHAMM) [Source:HGNC Symbol;Acc:5012]                       | -4.342408058 | 4.65940497  | 118.1394811 | 1.62E-27 | 5.56E-25 | 5.735923879 | 5.629886249 | 0.75024962   | 0.722650538  | 4.314204472 |
| ENSG00000112984 | KIF20A    | kinesin family member 20A [Source:HGNC Symbol;Acc:9787]                                           | -5.054223802 | 4.054835521 | 117.2710672 | 2.50E-27 | 8.45E-25 | 5.180241648 | 4.951449524 | -0.99931534  | -0.655391447 | 3.853782901 |
| ENSG00000133742 | CA1       | carbonic anhydrase I [Source:HGNC Symbol;Acc:1368]                                                | -7.161992347 | 7.94844847  | 116.7036839 | 3.33E-27 | 1.10E-24 | 8.838217754 | 9.291234283 | 2.572856422  | -0.099242291 | 7.166048797 |
| ENSG00000169255 | B3GALNT1  | beta-1,3-N-acetylgalactosaminyltransferase 1 (globoside blood group) [Source:HGNC Symbol;Acc:918] | -4.938772537 | 4.228220086 | 115.6528437 | 5.66E-27 | 1.84E-24 | 5.605359776 | 5.187663739 | -0.329705368 | -0.525689211 | 2.758908956 |
| ENSG00000243238 | IGKV2-30  | immunoglobulin kappa variable 2-30 [Source:HGNC Symbol;Acc:5785]                                  | -5.968750798 | 5.54245143  | 114.9868559 | 7.92E-27 | 2.53E-24 | 7.120162256 | 6.13079577  | 1.053829154  | -1.042179808 | 4.391417975 |
| ENSG00000211892 | IGHG4     | immunoglobulin heavy constant gamma 4 (G4m marker) [Source:HGNC Symbol;Acc:5528]                  | -6.335098493 | 8.015924055 | 114.6080527 | 9.59E-27 | 3.01E-24 | 8.590010923 | 7.895418299 | 2.448220886  | 0.74852395   | 9.373775019 |
| ENSG00000167513 | CDT1      | chromatin licensing and DNA replication factor 1 [Source:HGNC Symbol;Acc:24576]                   | -4.326091261 | 4.500947616 | 114.367747  | 1.08E-26 | 3.33E-24 | 5.48982274  | 5.45329231  | 0.884581662  | 0.984547783  | 4.345117047 |
| ENSG00000176890 | TYMS      | thymidylate synthetase [Source:HGNC Symbol;Acc:12441]                                             | -4.478929501 | 5.511401825 | 113.9626567 | 1.33E-26 | 4.02E-24 | 6.566773155 | 6.388974993 | 1.360908506  | 2.045707388  | 5.40813974  |
| ENSG00000211642 | IGLV10-54 | immunoglobulin lambda variable 10-54 [Source:HGNC Symbol;Acc:5884]                                | -5.595282681 | 4.340854576 | 113.4216512 | 1.74E-26 | 5.19E-24 | 5.842018808 | 5.035821043 | -0.10933503  | -1.854339469 | 3.27086176  |
| ENSG00000241294 | IGKV2-24  | immunoglobulin kappa variable 2-24 [Source:HGNC Symbol;Acc:5781]                                  | -5.632456226 | 5.296048969 | 113.2711708 | 1.88E-26 | 5.51E-24 | 6.84030886  | 5.808760266 | 0.983710868  | -0.589083246 | 4.515764535 |
| ENSG00000211637 | IGLV4-69  | immunoglobulin lambda variable 4-69 [Source:HGNC Symbol;Acc:5921]                                 | -5.109397867 | 4.668263214 | 112.7112819 | 2.50E-26 | 7.18E-24 | 6.125546594 | 5.196714041 | 0.210162819  | -0.053815412 | 4.188725022 |
| ENSG00000211938 | IGHV3-7   | immunoglobulin heavy variable 3-7 [Source:HGNC Symbol;Acc:5620]                                   | -4.985715306 | 6.82526429  | 111.6943157 | 4.17E-26 | 1.18E-23 | 8.332940658 | 7.306914068 | 2.321298905  | 2.657338701  | 6.221321101 |
| ENSG00000240864 | IGKV1-16  | immunoglobulin kappa variable 1-16 [Source:HGNC Symbol;Acc:5732]                                  | -4.430079843 | 5.604219858 | 111.5629661 | 4.45E-26 | 1.24E-23 | 6.770508941 | 6.106390873 | 1.501363361  | 1.770646721  | 5.873730193 |
| ENSG00000133026 | MYH10     | myosin, heavy chain 10, non-muscle [Source:HGNC Symbol;Acc:7568]                                  | -4.724774205 | 4.993304343 | 111.50872   | 4.58E-26 | 1.26E-23 | 6.059196115 | 6.190343949 | 0.036330944  | 1.43048915   | 3.95282564  |

|                 |          |                                                                                                     |              |             |             |          |          |             |             |              |              |             |
|-----------------|----------|-----------------------------------------------------------------------------------------------------|--------------|-------------|-------------|----------|----------|-------------|-------------|--------------|--------------|-------------|
| ENSG00000111206 | FOXM1    | forkhead box M1 [Source:HGNC Symbol;Acc:3818]                                                       | -4.327759315 | 4.822568413 | 110.3879561 | 8.06E-26 | 2.18E-23 | 5.744566712 | 5.776678697 | 0.538319988  | 1.187332556  | 4.858347165 |
| ENSG00000172232 | AZU1     | azurocidin 1 [Source:HGNC Symbol;Acc:913]                                                           | -4.650179313 | 5.657235786 | 109.4484516 | 1.29E-25 | 3.44E-23 | 5.679348798 | 6.103987655 | 0.036330944  | 1.39816257   | 7.0045158   |
| ENSG0000011426  | ANLN     | anillin, actin binding protein [Source:HGNC Symbol;Acc:14082]                                       | -4.322713049 | 4.52673905  | 108.8120064 | 1.78E-25 | 4.68E-23 | 5.425703787 | 5.454236005 | 0.081791624  | 0.556835562  | 4.677716762 |
| ENSG00000198901 | PRC1     | protein regulator of cytokinesis 1 [Source:HGNC Symbol;Acc:9341]                                    | -3.914980629 | 5.627851691 | 108.5096876 | 2.08E-25 | 5.37E-23 | 6.607141062 | 6.603217413 | 2.34945221   | 2.650493526  | 5.351882062 |
| ENSG00000211953 | IGHV3-30 | immunoglobulin heavy variable 3-30 [Source:HGNC Symbol;Acc:5591]                                    | -5.532758757 | 7.596790763 | 108.4179538 | 2.18E-25 | 5.46E-23 | 9.009978251 | 8.239367937 | 3.334328805  | 1.992567844  | 7.085254968 |
| ENSG00000101057 | MYBL2    | v-myb avian myeloblastosis viral oncogene homolog-like 2 [Source:HGNC Symbol;Acc:7548]              | -3.906729655 | 5.461929768 | 108.4356499 | 2.16E-25 | 5.46E-23 | 6.336908399 | 6.394885118 | 2.085000104  | 2.303059008  | 5.520735338 |
| ENSG00000211663 | IGLV3-19 | immunoglobulin lambda variable 3-19 [Source:HGNC Symbol;Acc:5903]                                   | -5.117502932 | 6.133292464 | 108.2516323 | 2.37E-25 | 5.85E-23 | 7.606135168 | 6.790467091 | 2.321298905  | 0.894716898  | 5.25879103  |
| ENSG00000135451 | TROAP    | trophinin associated protein [Source:HGNC Symbol;Acc:12327]                                         | -4.537649542 | 4.213556524 | 107.9444781 | 2.76E-25 | 6.71E-23 | 5.295302869 | 4.958117738 | 0.081791624  | -0.146146183 | 4.33330585  |
| ENSG00000137804 | NUSAP1   | nucleolar and spindle associated protein 1 [Source:HGNC Symbol;Acc:18538]                           | -3.705922629 | 5.570012491 | 107.9265844 | 2.79E-25 | 6.71E-23 | 6.39460723  | 6.516878082 | 2.532495892  | 2.60872607   | 5.632905242 |
| ENSG00000211660 | IGLV2-23 | immunoglobulin lambda variable 2-23 [Source:HGNC Symbol;Acc:5890]                                   | -5.671420804 | 6.767590067 | 107.5640282 | 3.35E-25 | 7.95E-23 | 8.336661069 | 7.481149088 | 2.635172888  | 0.871357159  | 5.107514212 |
| ENSG00000085840 | ORC1     | origin recognition complex, subunit 1 [Source:HGNC Symbol;Acc:8487]                                 | -4.412896472 | 4.27203214  | 107.3869896 | 3.66E-25 | 8.57E-23 | 5.456542148 | 5.26176236  | 0.036330944  | 0.265774258  | 3.557451401 |
| ENSG00000211974 | IGHV2-70 | immunoglobulin heavy variable 2-70 [Source:HGNC Symbol;Acc:5577]                                    | -4.65657955  | 4.656702488 | 107.3272701 | 3.77E-25 | 8.72E-23 | 5.99545132  | 5.224635763 | 0.602113338  | 0.497040107  | 4.44068937  |
| ENSG00000211897 | IGHG3    | immunoglobulin heavy constant gamma 3 (G3m marker) [Source:HGNC Symbol;Acc:5527]                    | -6.469923038 | 9.546131895 | 107.2073696 | 4.01E-25 | 9.14E-23 | 11.17050615 | 10.16257116 | 4.241637747  | 3.796351586  | 7.987804566 |
| ENSG00000211964 | IGHV3-48 | immunoglobulin heavy variable 3-48 [Source:HGNC Symbol;Acc:5606]                                    | -5.266659167 | 6.07354345  | 107.0255812 | 4.39E-25 | 9.89E-23 | 7.500646421 | 6.636855326 | 2.107155349  | 0.527247606  | 5.646332579 |
| ENSG00000169679 | BUB1     | BUB1 mitotic checkpoint serine/threonine kinase [Source:HGNC Symbol;Acc:1148]                       | -3.966307573 | 4.806368348 | 106.5472332 | 5.59E-25 | 1.24E-22 | 5.812728526 | 5.667804805 | 1.566775005  | 0.984547783  | 4.787400207 |
| ENSG00000211947 | IGHV3-21 | immunoglobulin heavy variable 3-21 [Source:HGNC Symbol;Acc:5586]                                    | -4.967362918 | 6.504649009 | 106.3872541 | 6.06E-25 | 1.33E-22 | 7.918153567 | 7.064279521 | 2.74522259   | 1.43048915   | 6.100399002 |
| ENSG00000253755 | IGHGP    | immunoglobulin heavy constant gamma P (non-functional) [Source:HGNC Symbol;Acc:5529]                | -7.178894447 | 8.289107689 | 106.2201767 | 6.60E-25 | 1.43E-22 | 9.899470893 | 8.994731875 | 3.049757403  | 0.940331404  | 6.464325741 |
| ENSG00000102145 | GATA1    | GATA binding protein 1 (globin transcription factor 1) [Source:HGNC Symbol;Acc:4170]                | -4.264354241 | 5.111793543 | 103.8394368 | 2.19E-24 | 4.70E-22 | 6.319081102 | 6.11715609  | 1.379231566  | 2.156150191  | 4.022150723 |
| ENSG00000066279 | ASPM     | asp (abnormal spindle) homolog, microcephaly associated (Drosophila) [Source:HGNC Symbol;Acc:19048] | -4.059651384 | 4.638717839 | 103.3077864 | 2.87E-24 | 6.07E-22 | 5.132309049 | 5.827089554 | 1.120696904  | 0.871357159  | 4.826683557 |
| ENSG00000211669 | IGLV3-10 | immunoglobulin lambda variable 3-10 [Source:HGNC Symbol;Acc:5897]                                   | -5.448457565 | 4.032401038 | 102.2505475 | 4.89E-24 | 1.02E-21 | 5.005729219 | 4.272793714 | -1.721358966 | -1.854339469 | 4.884482612 |
| ENSG00000224373 | IGHV4-59 | immunoglobulin heavy variable 4-59 [Source:HGNC Symbol;Acc:5654]                                    | -5.609929798 | 6.022710873 | 102.045395  | 5.43E-24 | 1.12E-21 | 7.372962766 | 6.457876597 | 1.907011864  | -0.099242291 | 6.054375789 |
| ENSG00000240382 | IGKV1-17 | immunoglobulin kappa variable 1-17 [Source:HGNC Symbol;Acc:5733]                                    | -5.678343629 | 5.503302438 | 100.6304079 | 1.11E-23 | 2.25E-21 | 6.974574342 | 6.114173801 | 1.304500245  | -1.133744865 | 4.835083695 |
| ENSG00000186185 | KIF18B   | kinesin family member 18B [Source:HGNC Symbol;Acc:27102]                                            | -4.427998276 | 4.005928759 | 100.6225931 | 1.11E-23 | 2.25E-21 | 4.957476183 | 4.998786624 | -0.390491059 | -0.46496394  | 3.95282564  |
| ENSG00000115884 | SDC1     | syndecan 1 [Source:HGNC Symbol;Acc:10658]                                                           | -6.131662508 | 4.083717721 | 100.3256659 | 1.29E-23 | 2.58E-21 | 5.520341097 | 4.890006675 | -3.766908349 | -2.97427061  | 3.125029543 |
| ENSG00000241351 | IGKV3-11 | immunoglobulin kappa variable 3-11 [Source:HGNC Symbol;Acc:5815]                                    | -4.50343075  | 7.436027675 | 99.19027379 | 2.29E-23 | 4.52E-21 | 8.872136343 | 8.067016258 | 3.978722326  | 3.439318024  | 6.675049225 |
| ENSG00000211956 | IGHV4-34 | immunoglobulin heavy variable 4-34 [Source:HGNC Symbol;Acc:5650]                                    | -5.138009485 | 5.806963886 | 98.6128289  | 3.07E-23 | 5.99E-21 | 7.203394601 | 6.18580587  | 1.855590689  | 0.265774258  | 5.772401512 |
| ENSG00000123485 | HJURP    | Holliday junction recognition protein [Source:HGNC Symbol;Acc:25444]                                | -4.197440126 | 4.181720215 | 98.13396311 | 3.91E-23 | 7.54E-21 | 5.142808642 | 5.071928522 | 0.125863448  | 0.114810932  | 4.270278622 |
| ENSG00000169607 | CKAP2L   | cytoskeleton associated protein 2-like [Source:HGNC Symbol;Acc:26877]                               | -4.392454924 | 3.937260433 | 97.98308732 | 4.22E-23 | 8.05E-21 | 4.913697322 | 4.938019915 | -0.390491059 | -0.525689211 | 3.810136354 |
| ENSG00000211638 | IGLV8-61 | immunoglobulin lambda variable 8-61 [Source:HGNC Symbol;Acc:5931]                                   | -5.028984992 | 4.536231442 | 97.86274899 | 4.48E-23 | 8.46E-21 | 5.724610229 | 4.781402895 | 0.210162819  | -0.956081001 | 5.075257746 |
| ENSG00000211640 | IGLV6-57 | immunoglobulin lambda variable 6-57 [Source:HGNC Symbol;Acc:5927]                                   | -5.340751891 | 5.677114329 | 97.54002426 | 5.28E-23 | 9.86E-21 | 7.173622725 | 6.345895385 | 1.868618824  | -0.244792505 | 4.662693157 |
| ENSG00000242371 | IGKV1-39 | immunoglobulin kappa variable 1-39 (gene/pseudogene) [Source:HGNC Symbol;Acc:5740]                  | -5.583737944 | 4.440653251 | 95.39693392 | 1.56E-22 | 2.88E-20 | 5.881737769 | 5.028236357 | 0.210162819  | -2.419096061 | 3.940421563 |

|                 |             |                                                                                                                |              |             |             |          |          |             |             |              |              |             |
|-----------------|-------------|----------------------------------------------------------------------------------------------------------------|--------------|-------------|-------------|----------|----------|-------------|-------------|--------------|--------------|-------------|
| ENSG00000225485 | ARHGAP23    | Rho GTPase activating protein 23<br>[Source:HGNC Symbol;Acc:29293]                                             | -4.427442671 | 3.928989317 | 95.15849956 | 1.76E-22 | 3.21E-20 | 4.815392102 | 5.162478625 | -0.907612816 | -0.589083246 | 3.412306925 |
| ENSG00000211967 | IGHV3-53    | immunoglobulin heavy variable 3-53<br>[Source:HGNC Symbol;Acc:5610]                                            | -4.511088934 | 4.826024946 | 94.93740198 | 1.97E-22 | 3.56E-20 | 6.062656243 | 5.133315125 | 0.983710868  | 0.434658742  | 5.181845156 |
| ENSG00000211662 | IGLV3-21    | immunoglobulin lambda variable 3-21<br>[Source:HGNC Symbol;Acc:5905]                                           | -6.058839494 | 7.41620713  | 94.54567244 | 2.40E-22 | 4.29E-20 | 8.957787089 | 8.008792486 | 3.026695712  | 0.917704421  | 6.47404004  |
| ENSG00000237649 | KIFC1       | kinesin family member C1 [Source:HGNC<br>Symbol;Acc:6389]                                                      | -3.872038329 | 4.515417222 | 94.34744114 | 2.65E-22 | 4.69E-20 | 5.533367836 | 5.354651283 | 1.142314722  | 1.048430793  | 4.494710155 |
| ENSG00000138160 | KIF11       | kinesin family member 11 [Source:HGNC<br>Symbol;Acc:6388]                                                      | -3.414219242 | 5.188821107 | 90.69509655 | 1.68E-21 | 2.94E-19 | 5.94834458  | 6.106991053 | 2.6198443    | 2.003353492  | 5.365863633 |
| ENSG00000073111 | MCM2        | minichromosome maintenance complex<br>component 2 [Source:HGNC<br>Symbol;Acc:6944]                             | -3.347054602 | 6.16069115  | 90.58127865 | 1.78E-21 | 3.09E-19 | 7.059111719 | 7.049680904 | 3.843391443  | 3.443284076  | 6.051495058 |
| ENSG00000143476 | DTL         | denticleless E3 ubiquitin protein ligase<br>homolog (Drosophila) [Source:HGNC<br>Symbol;Acc:30288]             | -3.814706661 | 4.264745289 | 89.0364815  | 3.88E-21 | 6.67E-19 | 5.117746192 | 5.310518437 | 0.632982468  | 0.847612951  | 4.172906862 |
| ENSG00000211959 | IGHV4-39    | immunoglobulin heavy variable 4-39<br>[Source:HGNC Symbol;Acc:5651]                                            | -5.177367804 | 6.78090876  | 88.72234099 | 4.54E-21 | 7.74E-19 | 8.185852252 | 7.298531266 | 2.961306749  | 1.12943269   | 6.507008424 |
| ENSG00000129244 | ATP1B2      | ATPase, Na <sup>+</sup> /K <sup>+</sup> transporting, beta 2<br>polypeptide [Source:HGNC Symbol;Acc:805]       | -5.229161472 | 3.324857268 | 88.58242519 | 4.88E-21 | 8.23E-19 | 4.321238306 | 4.654130775 | -2.845623393 | -2.419096061 | 2.087470534 |
| ENSG00000231475 | IGHV4-31    | immunoglobulin heavy variable 4-31<br>[Source:HGNC Symbol;Acc:5649]                                            | -5.243021949 | 6.634106689 | 88.2558667  | 5.75E-21 | 9.62E-19 | 7.986237702 | 7.099991828 | 2.687575605  | 0.722650538  | 6.60751686  |
| ENSG00000167900 | TK1         | thymidine kinase 1, soluble [Source:HGNC<br>Symbol;Acc:11830]                                                  | -3.861011849 | 4.470624011 | 87.89978744 | 6.89E-21 | 1.14E-18 | 5.366462687 | 5.490566773 | 0.778135316  | 1.331251704  | 4.328554163 |
| ENSG00000232216 | IGHV3-43    | immunoglobulin heavy variable 3-43<br>[Source:HGNC Symbol;Acc:5604]                                            | -5.032944607 | 4.426273435 | 87.44777244 | 8.65E-21 | 1.42E-18 | 5.721986739 | 4.962103922 | 0.602113338  | -1.572251189 | 4.420735849 |
| ENSG00000178752 | FAM132B     | family with sequence similarity 132, member<br>B [Source:HGNC Symbol;Acc:26727]                                | -4.462465838 | 3.59865254  | 87.40499743 | 8.84E-21 | 1.44E-18 | 4.838182845 | 4.773863491 | -1.438615935 | -0.146146183 | 1.580441325 |
| ENSG00000167994 | RAB31L1     | RAB3A interacting protein (rabin3)-like 1<br>[Source:HGNC Symbol;Acc:9780]                                     | -6.199340122 | 3.409869185 | 87.08642531 | 1.04E-20 | 1.66E-18 | 4.391160537 | 4.76780347  | -4.621297774 | -3.888428289 | 2.153441144 |
| ENSG00000240583 | AQP1        | aquaporin 1 (Colton blood group)<br>[Source:HGNC Symbol;Acc:633]                                               | -4.368078632 | 4.024929694 | 87.08487469 | 1.04E-20 | 1.66E-18 | 4.692133273 | 5.513383552 | -0.520331194 | -0.053815412 | 2.968901188 |
| ENSG00000242076 | IGKV1-33    | immunoglobulin kappa variable 1-33<br>[Source:HGNC Symbol;Acc:5737]                                            | -6.367157478 | 3.505828492 | 86.93180856 | 1.12E-20 | 1.78E-18 | 5.161001044 | 3.928913775 | -3.233942493 | -2.670141381 | 2.390748373 |
| ENSG00000211933 | IGHV6-1     | immunoglobulin heavy variable 6-1<br>[Source:HGNC Symbol;Acc:5662]                                             | -4.687534718 | 4.35859519  | 86.82186159 | 1.19E-20 | 1.84E-18 | 5.885650178 | 4.867514017 | 0.75024962   | -0.350682213 | 3.524590078 |
| ENSG00000138778 | CENPE       | centromere protein E, 312kDa [Source:HGNC<br>Symbol;Acc:1856]                                                  | -3.60756482  | 4.419097959 | 86.83270368 | 1.18E-20 | 1.84E-18 | 5.066276063 | 5.485036629 | 1.450281721  | 1.148991974  | 4.548825207 |
| ENSG00000104738 | MCM4        | minichromosome maintenance complex<br>component 4 [Source:HGNC<br>Symbol;Acc:6947]                             | -3.271902459 | 6.582582049 | 86.14810875 | 1.67E-20 | 2.57E-18 | 7.339978958 | 7.532092247 | 4.221468244  | 4.048876701  | 6.5937216   |
| ENSG00000211893 | IGHG2       | immunoglobulin heavy constant gamma 2<br>(G2m marker) [Source:HGNC<br>Symbol;Acc:5526]                         | -5.387177062 | 8.966710129 | 85.71257651 | 2.08E-20 | 3.18E-18 | 10.00992253 | 8.947091741 | 4.169775227  | 3.833089756  | 9.883404875 |
| ENSG00000211655 | IGLV1-36    | immunoglobulin lambda variable 1-36<br>[Source:HGNC Symbol;Acc:5876]                                           | -5.071840489 | 3.542227229 | 85.17917758 | 2.73E-20 | 4.12E-18 | 4.729184325 | 4.131277536 | -0.82139248  | -2.97427061  | 3.725915699 |
| ENSG00000135476 | ESPL1       | extra spindle pole bodies homolog 1 (S.<br>cerevisiae) [Source:HGNC<br>Symbol;Acc:16856]                       | -3.852063805 | 4.137641432 | 84.62225261 | 3.61E-20 | 5.42E-18 | 5.105720809 | 4.997492463 | 0.365283811  | 0.527247606  | 4.217282073 |
| ENSG00000128274 | A4GALT      | alpha 1,4-galactosyltransferase<br>[Source:HGNC Symbol;Acc:18149]                                              | -4.644975252 | 3.450200973 | 84.42422967 | 3.99E-20 | 5.94E-18 | 4.792235539 | 4.605689658 | -1.097244829 | -2.205328685 | 0.646616095 |
| ENSG00000170312 | CDK1        | cyclin-dependent kinase 1 [Source:HGNC<br>Symbol;Acc:1722]                                                     | -3.363928367 | 4.84178868  | 84.28597388 | 4.28E-20 | 6.32E-18 | 5.765100676 | 5.757693317 | 2.292585253  | 2.066427005  | 4.672101228 |
| ENSG00000244116 | IGKV2-28    | immunoglobulin kappa variable 2-28<br>[Source:HGNC Symbol;Acc:5783]                                            | -5.242475207 | 3.24814524  | 83.86494637 | 5.30E-20 | 7.75E-18 | 4.618813883 | 3.915271737 | -1.202308962 | -2.670141381 | 2.800681624 |
| ENSG00000142945 | KIF2C       | kinesin family member 2C [Source:HGNC<br>Symbol;Acc:6393]                                                      | -3.811737078 | 4.18819868  | 83.64393015 | 5.92E-20 | 8.59E-18 | 5.248673242 | 5.006527308 | 0.805492218  | 0.642123966  | 4.118890838 |
| ENSG00000204613 | TRIM10      | tripartite motif containing 10 [Source:HGNC<br>Symbol;Acc:10072]                                               | -4.749550241 | 4.331449386 | 83.40172132 | 6.70E-20 | 9.64E-18 | 5.027140012 | 5.743095465 | -1.438615935 | 0.696304622  | 3.601447293 |
| ENSG00000121152 | NCAPH       | non-SMC condensin I complex, subunit H<br>[Source:HGNC Symbol;Acc:1112]                                        | -3.700465287 | 4.219689028 | 83.02989384 | 8.08E-20 | 1.15E-17 | 5.161001044 | 5.154372093 | 1.285196495  | 0.466186565  | 4.140740531 |
| ENSG00000252921 | IGHV4OR15-8 | immunoglobulin heavy variable 4/OR15-8<br>(non-functional) [Source:HGNC<br>Symbol;Acc:5658]                    | -5.40348623  | 4.427022239 | 82.49336204 | 1.06E-19 | 1.50E-17 | 5.658462756 | 4.576518077 | -0.059127673 | -2.97427061  | 4.993565856 |
| ENSG00000128268 | MGAT3       | mannosyl (beta-1,4)-glycoprotein beta-1,4-<br>N-acetylglucosaminyltransferase<br>[Source:HGNC Symbol;Acc:7046] | -3.547481038 | 4.464891548 | 82.27364705 | 1.18E-19 | 1.66E-17 | 5.649286698 | 5.470185095 | 1.829176068  | 1.242998101  | 3.27086176  |

|                 |               |                                                                                         |              |             |             |          |          |             |             |              |              |              |
|-----------------|---------------|-----------------------------------------------------------------------------------------|--------------|-------------|-------------|----------|----------|-------------|-------------|--------------|--------------|--------------|
| ENSG00000127564 | PKMYT1        | protein kinase, membrane associated tyrosine/threonine 1 [Source:HGNC Symbol;Acc:29650] | -3.896735169 | 3.96573202  | 82.25261329 | 1.20E-19 | 1.67E-17 | 4.890520841 | 4.799338318 | -0.059127673 | 0.402426505  | 4.172906862  |
| ENSG00000241244 | IGKV1D-16     | immunoglobulin kappa variable 1D-16 [Source:HGNC Symbol;Acc:5748]                       | -5.331511831 | 3.782391755 | 82.07519469 | 1.31E-19 | 1.81E-17 | 5.197970942 | 4.227146839 | -0.520331194 | -2.670141381 | 3.613216922  |
| ENSG00000183856 | IQGAP3        | IQ motif containing GTPase activating protein 3 [Source:HGNC Symbol;Acc:20669]          | -4.111662435 | 3.910125814 | 81.99985683 | 1.36E-19 | 1.87E-17 | 4.590329104 | 4.59374918  | -1.097244829 | -0.589083246 | 4.673975502  |
| ENSG00000223648 | IGHV3-64      | immunoglobulin heavy variable 3-64 [Source:HGNC Symbol;Acc:5617]                        | -4.841908393 | 3.538856045 | 81.63735092 | 1.63E-19 | 2.21E-17 | 4.650431026 | 4.08084297  | -0.520331194 | -2.419096061 | 3.899355549  |
| ENSG00000086289 | EPDR1         | ependymin related 1 [Source:HGNC Symbol;Acc:17572]                                      | -4.200677894 | 3.699258977 | 81.6341226  | 1.64E-19 | 2.21E-17 | 4.878006108 | 4.564332671 | -0.520331194 | -0.009775356 | 3.305127547  |
| ENSG00000214018 | RRM2P3        | ribonucleotide reductase M2 polypeptide pseudogene 3 [Source:HGNC Symbol;Acc:10455]     | -3.504025323 | 4.435978789 | 81.05320102 | 2.20E-19 | 2.94E-17 | 5.34275114  | 5.392559478 | 1.517996407  | 1.567613022  | 4.285069672  |
| ENSG00000211979 | IGHV7-81      | immunoglobulin heavy variable 7-81 (non-functional) [Source:HGNC Symbol;Acc:5669]       | -5.281401743 | 3.753317134 | 80.98602511 | 2.27E-19 | 3.02E-17 | 5.255945862 | 4.592035301 | -0.215316613 | -4.730697034 | 1.958084208  |
| ENSG00000123191 | ATP7B         | ATPase, Cu++ transporting, beta polypeptide [Source:HGNC Symbol;Acc:870]                | -3.691833211 | 4.089526406 | 80.81205794 | 2.48E-19 | 3.28E-17 | 5.202996693 | 5.148553697 | 0.959559782  | 0.962608982  | 3.102938765  |
| ENSG00000122966 | CIT           | citron (rho-interacting, serine/threonine kinase 21) [Source:HGNC Symbol;Acc:1985]      | -4.055432715 | 4.191627198 | 80.71838048 | 2.60E-19 | 3.41E-17 | 5.005729219 | 5.189931642 | 1.163613388  | -0.406691783 | 4.280156152  |
| ENSG00000160957 | RECQL4        | RecQ protein-like 4 [Source:HGNC Symbol;Acc:9949]                                       | -3.233602256 | 4.649702372 | 80.51808686 | 2.88E-19 | 3.75E-17 | 5.479504787 | 5.539406699 | 2.358715867  | 2.086853261  | 4.626372277  |
| ENSG00000065328 | MCM10         | minichromosome maintenance complex component 10 [Source:HGNC Symbol;Acc:18043]          | -3.863686362 | 3.872517633 | 80.29378464 | 3.23E-19 | 4.17E-17 | 4.80386028  | 4.950112174 | 0.036330944  | 0.301169826  | 3.561506932  |
| ENSG00000211648 | IGLV1-47      | immunoglobulin lambda variable 1-47 [Source:HGNC Symbol;Acc:5880]                       | -4.762512955 | 5.987112041 | 80.22297499 | 3.34E-19 | 4.25E-17 | 7.237471374 | 6.551683587 | 2.532495892  | 0.497040107  | 6.021631095  |
| ENSG00000107789 | MINPP1        | multiple inositol-polyphosphate phosphatase 1 [Source:HGNC Symbol;Acc:7102]             | -3.13464685  | 5.378091212 | 80.22806729 | 3.34E-19 | 4.25E-17 | 6.194667282 | 6.481212079 | 3.30587588   | 2.691085717  | 4.841768766  |
| ENSG00000122952 | ZWINT         | ZW10 interacting kinetochore protein [Source:HGNC Symbol;Acc:13195]                     | -3.280830841 | 4.60710314  | 79.82007097 | 4.10E-19 | 5.18E-17 | 5.519334152 | 5.472049919 | 2.202847421  | 2.086853261  | 4.488333455  |
| ENSG00000242534 | IGKV2D-28     | immunoglobulin kappa variable 2D-28 [Source:HGNC Symbol;Acc:5799]                       | -5.047527937 | 3.365020595 | 79.55819    | 4.68E-19 | 5.87E-17 | 4.820306233 | 3.99265773  | -0.740035668 | -2.205328685 | 2.641213969  |
| ENSG00000243264 | IGKV2D-29     | immunoglobulin kappa variable 2D-29 [Source:HGNC Symbol;Acc:5800]                       | -5.147711735 | 3.894398799 | 79.54314369 | 4.72E-19 | 5.87E-17 | 5.579506799 | 4.447875012 | -0.010608983 | -1.449512048 | 1.612068369  |
| ENSG00000214998 | AC006465.4    |                                                                                         | -4.362980181 | 3.289251808 | 79.09424788 | 5.92E-19 | 7.32E-17 | 4.478721339 | 4.207132934 | -0.907612816 | -0.589083246 | 2.723150012  |
| ENSG00000133488 | SEC14L4       | SEC14-like 4 (S. cerevisiae) [Source:HGNC Symbol;Acc:20627]                             | -7.275622228 | 3.007903877 | 79.04463718 | 6.07E-19 | 7.45E-17 | 3.918660435 | 4.372005251 | -4.621297774 | -7.002070102 | 1.994537666  |
| ENSG00000211685 | IGLC7         | immunoglobulin lambda constant 7 [Source:HGNC Symbol;Acc:5861]                          | -5.128345401 | 3.625916121 | 78.87372324 | 6.62E-19 | 8.07E-17 | 5.300001274 | 4.16394696  | -0.99931534  | -1.133744865 | 1.658245749  |
| ENSG00000250361 | GYPB          | glycophorin B (MNS blood group) [Source:HGNC Symbol;Acc:4703]                           | -5.478663777 | 3.436025336 | 78.81545105 | 6.82E-19 | 8.26E-17 | 4.160023991 | 4.952785634 | -2.287883461 | -4.730697034 | 2.216526545  |
| ENSG00000211965 | IGHV3-49      | immunoglobulin heavy variable 3-49 [Source:HGNC Symbol;Acc:5607]                        | -5.406807826 | 5.279174037 | 78.74039907 | 7.08E-19 | 8.52E-17 | 6.862315351 | 5.784953762 | 1.432844522  | -1.231517591 | 4.267798636  |
| ENSG00000270999 | CH17-132F21.1 | Uncharacterized protein [Source:UniProtKB/TrEMBL;Acc:54R394]                            | -5.219962285 | 3.449506303 | 78.474353   | 8.10E-19 | 9.68E-17 | 5.062133335 | 3.966439161 | -0.907612816 | -2.0191864   | 2.174777591  |
| ENSG00000110693 | SOX6          | SRY (sex determining region Y)-box 6 [Source:HGNC Symbol;Acc:16421]                     | -5.176951181 | 2.562168712 | 78.32931812 | 8.72E-19 | 1.03E-16 | 3.420029142 | 3.847931966 | -2.539967122 | -2.670141381 | 1.908000984  |
| ENSG00000115461 | IGFBP5        | insulin-like growth factor binding protein 5 [Source:HGNC Symbol;Acc:5474]              | -11.02378861 | 2.349139128 | 78.27450522 | 8.97E-19 | 1.06E-16 | 3.753783962 | 3.480241792 | -7.002070102 | -7.002070102 | -1.083770229 |
| ENSG00000117399 | CDC20         | cell division cycle 20 [Source:HGNC Symbol;Acc:1723]                                    | -4.307411958 | 3.131239647 | 77.67350751 | 1.22E-18 | 1.42E-16 | 4.30262994  | 4.088156756 | -0.99931534  | -0.797916568 | 2.504656975  |
| ENSG00000226650 | KIF4B         | kinesin family member 4B [Source:HGNC Symbol;Acc:6322]                                  | -4.236450677 | 3.17778869  | 77.44751912 | 1.36E-18 | 1.58E-16 | 4.055540716 | 4.306627984 | -0.907612816 | -0.655391447 | 2.874258264  |
| ENSG00000183010 | PYCR1         | pyrroline-5-carboxylate reductase 1 [Source:HGNC Symbol;Acc:9721]                       | -3.987888141 | 3.709212595 | 77.3679767  | 1.42E-18 | 1.64E-16 | 4.970796966 | 4.578250478 | 0.125863448  | 0.114810932  | 2.938038295  |
| ENSG00000239975 | IGKV1D-33     | immunoglobulin kappa variable 1D-33 [Source:HGNC Symbol;Acc:5753]                       | -5.838861924 | 3.452612906 | 77.29574011 | 1.47E-18 | 1.69E-16 | 5.120404941 | 3.82768418  | -1.57307192  | -3.360122781 | 2.334979851  |
| ENSG00000211649 | IGLV7-46      | immunoglobulin lambda variable 7-46 (gene/pseudogene) [Source:HGNC Symbol;Acc:5930]     | -4.637468367 | 4.004604459 | 77.01438853 | 1.70E-18 | 1.93E-16 | 5.345026248 | 4.409466019 | 0.28980717   | -1.133744865 | 4.036790502  |
| ENSG00000211671 | IGLV2-8       | immunoglobulin lambda variable 2-8 [Source:HGNC Symbol;Acc:5895]                        | -4.943398653 | 5.572086379 | 76.94544842 | 1.76E-18 | 1.98E-16 | 6.951243297 | 6.026161252 | 2.039642018  | -0.244792505 | 5.450306193  |
| ENSG00000112742 | TTK           | TTK protein kinase [Source:HGNC Symbol;Acc:12401]                                       | -3.777560742 | 3.760504143 | 76.95601946 | 1.75E-18 | 1.98E-16 | 4.697484895 | 4.751005954 | 0.471574783  | 0.114810932  | 3.597502649  |
| ENSG00000243466 | IGKV1-5       | immunoglobulin kappa variable 1-5 [Source:HGNC Symbol;Acc:5741]                         | -5.715470218 | 8.08357503  | 76.74053002 | 1.95E-18 | 2.18E-16 | 9.57711032  | 8.704662516 | 3.836777169  | 1.65228493   | 7.299817524  |

|                 |          |                                                                                                           |              |             |             |          |          |             |             |              |              |              |
|-----------------|----------|-----------------------------------------------------------------------------------------------------------|--------------|-------------|-------------|----------|----------|-------------|-------------|--------------|--------------|--------------|
| ENSG00000211898 | IGHD     | immunoglobulin heavy constant delta [Source:HGNC Symbol;Acc:5480]                                         | -4.119964063 | 8.054952954 | 76.67091816 | 2.02E-18 | 2.24E-16 | 9.422431618 | 8.812545546 | 5.400059163  | 4.795946491  | 6.949484052  |
| ENSG00000004809 | SLC22A16 | solute carrier family 22 (organic cation/carnitine transporter), member 16 [Source:HGNC Symbol;Acc:20302] | -4.091244638 | 3.443735944 | 76.48178553 | 2.22E-18 | 2.45E-16 | 4.335038744 | 4.56782473  | -0.502331194 | -1.231517591 | 3.178820438  |
| ENSG00000165480 | SKA3     | spindle and kinetochore associated complex subunit 3 [Source:HGNC Symbol;Acc:20262]                       | -4.108687942 | 3.413423813 | 75.87677567 | 3.02E-18 | 3.31E-16 | 4.537594837 | 4.327378419 | -0.907612816 | -0.7248947   | 3.091765221  |
| ENSG00000109805 | NCAPG    | non-SMC condensin I complex, subunit G [Source:HGNC Symbol;Acc:24304]                                     | -3.858946463 | 3.705209931 | 75.64528275 | 3.39E-18 | 3.70E-16 | 4.644901642 | 4.588601424 | 0.250534523  | -0.350682213 | 3.79299123   |
| ENSG00000166803 | KIAA0101 | KIAA0101 [Source:HGNC Symbol;Acc:28961]                                                                   | -4.120255942 | 3.729358726 | 75.61519008 | 3.45E-18 | 3.74E-16 | 4.954499232 | 4.472303462 | -0.390491059 | -0.244792505 | 3.486703703  |
| ENSG00000156970 | BUB1B    | BUB1 mitotic checkpoint serine/threonine kinase B [Source:HGNC Symbol;Acc:1149]                           | -3.73691492  | 3.900385844 | 75.56401733 | 3.54E-18 | 3.81E-16 | 4.921340809 | 4.755606525 | 0.28980717   | 0.301169826  | 3.866951213  |
| ENSG00000211659 | IGLV3-25 | immunoglobulin lambda variable 3-25 [Source:HGNC Symbol;Acc:5908]                                         | -5.710932147 | 6.051161682 | 75.12981436 | 4.41E-18 | 4.72E-16 | 7.571336458 | 6.612968907 | 1.944409617  | -1.133744865 | 5.281096681  |
| ENSG00000116678 | LEPR     | leptin receptor [Source:HGNC Symbol;Acc:6554]                                                             | -3.161435856 | 5.258968255 | 74.69046821 | 5.51E-18 | 5.86E-16 | 6.410444715 | 6.186373911 | 3.049757403  | 3.188355007  | 3.986396982  |
| ENSG00000188672 | RHCE     | Rh blood group, CcEe antigens [Source:HGNC Symbol;Acc:10008]                                              | -4.661535175 | 3.339463343 | 74.37374222 | 6.46E-18 | 6.84E-16 | 4.055540716 | 4.875989911 | -1.886652327 | -2.0191864   | 1.895203721  |
| ENSG00000136929 | HEMGN    | hemogen [Source:HGNC Symbol;Acc:17509]                                                                    | -3.692081655 | 5.878024375 | 74.21575578 | 7.00E-18 | 7.36E-16 | 6.370240951 | 7.286659928 | 2.723873993  | 3.20246409   | 5.286007005  |
| ENSG00000211966 | IGHV5-51 | immunoglobulin heavy variable 5-51 [Source:HGNC Symbol;Acc:5659]                                          | -4.818048969 | 6.999916879 | 73.98915414 | 7.85E-18 | 8.21E-16 | 8.472146307 | 7.330746799 | 3.455848046  | 1.75796486   | 6.77142346   |
| ENSG00000183032 | SLC25A21 | solute carrier family 25 (mitochondrial oxoadipate carrier), member 21 [Source:HGNC Symbol;Acc:14411]     | -7.199482952 | 2.710294773 | 73.84732851 | 8.44E-18 | 8.77E-16 | 4.030315369 | 3.703019536 | -4.621297774 | -7.002070102 | 1.580441325  |
| ENSG00000211949 | IGHV3-23 | immunoglobulin heavy variable 3-23 [Source:HGNC Symbol;Acc:5588]                                          | -5.04677718  | 8.134436961 | 73.80266673 | 8.63E-18 | 8.91E-16 | 9.564779385 | 8.62801567  | 4.331420098  | 2.684399171  | 7.815127716  |
| ENSG00000130821 | SLC6A8   | solute carrier family 6 (neurotransmitter transporter), member 8 [Source:HGNC Symbol;Acc:11055]           | -3.775823845 | 4.428707972 | 73.56214572 | 9.75E-18 | 1.00E-15 | 5.427851864 | 5.557084059 | 0.9100098    | 1.832435869  | 3.557451401  |
| ENSG00000241755 | IGKV1-9  | immunoglobulin kappa variable 1-9 [Source:HGNC Symbol;Acc:5744]                                           | -6.272412205 | 6.439612109 | 73.41129347 | 1.05E-17 | 1.07E-15 | 8.034082604 | 6.938081855 | 1.855590689  | -1.572251189 | 5.492337715  |
| ENSG00000211673 | IGLV3-1  | immunoglobulin lambda variable 3-1 [Source:HGNC Symbol;Acc:5896]                                          | -5.078496572 | 6.719504029 | 73.27367447 | 1.13E-17 | 1.15E-15 | 8.179332659 | 7.233508249 | 3.138485523  | 0.940331404  | 6.239154116  |
| ENSG00000129173 | E2F8     | E2F transcription factor 8 [Source:HGNC Symbol;Acc:24727]                                                 | -3.930605927 | 3.480680248 | 73.22498634 | 1.16E-17 | 1.17E-15 | 4.443058246 | 4.314964006 | -0.453950945 | -0.589083246 | 3.640311645  |
| ENSG0000041982  | TNC      | tenascin C [Source:HGNC Symbol;Acc:5318]                                                                  | -6.398975631 | 2.883639109 | 72.46298003 | 1.70E-17 | 1.71E-15 | 4.344166237 | 3.942428021 | -4.621297774 | -4.730697034 | -0.316136847 |
| ENSG00000211639 | IGLV4-60 | immunoglobulin lambda variable 4-60 [Source:HGNC Symbol;Acc:5920]                                         | -5.365231655 | 3.591154184 | 72.41880469 | 1.74E-17 | 1.74E-15 | 5.389790814 | 3.955816848 | -1.438615935 | -1.336401299 | 0.819133578  |
| ENSG00000211973 | IGHV1-69 | immunoglobulin heavy variable 1-69 [Source:HGNC Symbol;Acc:5558]                                          | -5.376154356 | 7.390931289 | 72.33349479 | 1.82E-17 | 1.80E-15 | 8.734980269 | 7.848276278 | 3.425312536  | 1.109604583  | 7.405122753  |
| ENSG00000143776 | CDC42BPA | CDC42 binding protein kinase alpha (DMPK-like) [Source:HGNC Symbol;Acc:1737]                              | -3.694841187 | 4.355587798 | 71.92078622 | 2.24E-17 | 2.21E-15 | 5.445982527 | 5.266068042 | 0.858697288  | 1.808036846  | 3.873490568  |
| ENSG00000211611 | IGKV6-21 | immunoglobulin kappa variable 6-21 (non-functional) [Source:HGNC Symbol;Acc:5836]                         | -5.658463285 | 3.183574707 | 71.88320432 | 2.28E-17 | 2.24E-15 | 4.758496361 | 3.480241792 | -2.287883461 | -2.670141381 | 2.71589062   |
| ENSG00000137807 | KIF23    | kinesin family member 23 [Source:HGNC Symbol;Acc:6392]                                                    | -3.487381444 | 4.4309585   | 71.63764911 | 2.59E-17 | 2.52E-15 | 5.382056609 | 5.299008392 | 1.098750223  | 1.493047208  | 4.427417733  |
| ENSG00000239855 | IGKV1-6  | immunoglobulin kappa variable 1-6 [Source:HGNC Symbol;Acc:5742]                                           | -4.939961212 | 5.320731552 | 71.39431041 | 2.93E-17 | 2.84E-15 | 6.675175993 | 5.522410173 | 1.644577544  | -0.589083246 | 5.573900552  |
| ENSG00000140534 | TICRR    | TOPBP1-interacting checkpoint and replication regulator [Source:HGNC Symbol;Acc:28704]                    | -4.174700185 | 3.299704255 | 71.210797   | 3.21E-17 | 3.10E-15 | 4.185638714 | 4.262055685 | -1.721358966 | -1.336401299 | 3.439004866  |
| ENSG00000211941 | IGHV3-11 | immunoglobulin heavy variable 3-11 (gene/pseudogene) [Source:HGNC Symbol;Acc:5580]                        | -5.192848201 | 5.915674801 | 71.17597499 | 3.27E-17 | 3.13E-15 | 7.416881779 | 6.607041069 | 2.330744516  | -0.406691783 | 4.775228946  |
| ENSG00000157456 | CCNB2    | cyclin B2 [Source:HGNC Symbol;Acc:1580]                                                                   | -4.092838951 | 3.607129055 | 71.09885422 | 3.40E-17 | 3.24E-15 | 4.800548473 | 4.537869269 | -1.202308962 | 0.074465887  | 3.005085735  |
| ENSG00000163808 | KIF15    | kinesin family member 15 [Source:HGNC Symbol;Acc:17273]                                                   | -3.51762656  | 3.888333422 | 70.82549503 | 3.90E-17 | 3.70E-15 | 4.70812895  | 4.821448519 | 0.471574783  | 0.696304622  | 4.028024474  |
| ENSG00000223350 | IGLV9-49 | immunoglobulin lambda variable 9-49 [Source:HGNC Symbol;Acc:5933]                                         | -4.660117087 | 3.671580682 | 70.1434988  | 5.51E-17 | 5.20E-15 | 5.276354728 | 4.374001309 | 0.250534523  | -1.449512048 | 1.239342106  |
| ENSG00000211942 | IGHV3-13 | immunoglobulin heavy variable 3-13 [Source:HGNC Symbol;Acc:5581]                                          | -4.877779059 | 3.508409608 | 70.01954902 | 5.87E-17 | 5.51E-15 | 4.970796966 | 4.182288334 | -0.10933503  | -2.670141381 | 2.586540774  |
| ENSG00000205072 | SEPP1    | selenoprotein P, plasma, 1 [Source:HGNC Symbol;Acc:10751]                                                 | -4.954176215 | 3.489042959 | 69.9940387  | 5.95E-17 | 5.55E-15 | 5.039835608 | 4.131277536 | -2.539967122 | -1.70641174  | 2.306265771  |
| ENSG00000239951 | IGKV3-20 | immunoglobulin kappa variable 3-20 [Source:HGNC Symbol;Acc:5817]                                          | -5.312814341 | 8.288330083 | 69.86450806 | 6.35E-17 | 5.90E-15 | 9.71860995  | 8.754162584 | 4.307700297  | 2.371259556  | 8.04214606   |
| ENSG00000105173 | CCNE1    | cyclin E1 [Source:HGNC Symbol;Acc:1589]                                                                   | -3.361500366 | 4.044085069 | 69.41254571 | 7.99E-17 | 7.38E-15 | 5.120404941 | 5.073157632 | 1.32354911   | 1.36509501   | 3.108493252  |

|                 |           |                                                                                       |              |             |             |          |          |             |             |              |              |              |
|-----------------|-----------|---------------------------------------------------------------------------------------|--------------|-------------|-------------|----------|----------|-------------|-------------|--------------|--------------|--------------|
| ENSG00000187266 | EPOR      | erythropoietin receptor [Source:HGNC Symbol;Acc:3416]                                 | -2.877568474 | 5.181606856 | 69.11804074 | 9.27E-17 | 8.52E-15 | 6.034740035 | 6.22282493  | 3.262115839  | 3.197776377  | 4.4668719    |
| ENSG00000244575 | IGKV1-27  | immunoglobulin kappa variable 1-27 [Source:HGNC Symbol;Acc:5735]                      | -4.739444231 | 3.969341019 | 69.03968856 | 9.65E-17 | 8.82E-15 | 5.391992993 | 4.078396779 | -0.010608983 | -1.042179808 | 4.146151637  |
| ENSG00000198959 | TGM2      | transglutaminase 2 [Source:HGNC Symbol;Acc:11778]                                     | -3.194087386 | 4.530937942 | 68.83127756 | 1.07E-16 | 9.76E-15 | 5.67030504  | 5.548272454 | 1.932051102  | 2.126858114  | 3.225574983  |
| ENSG00000224041 | IGKV3D-15 | immunoglobulin kappa variable 3D-15 (gene/pseudogene) [Source:HGNC Symbol;Acc:5824]   | -4.778620626 | 3.590085018 | 68.52728181 | 1.25E-16 | 1.13E-14 | 4.938015281 | 3.768216544 | -0.907612816 | -1.231517591 | 3.880000416  |
| ENSG00000051341 | POLQ      | polymerase (DNA directed), theta [Source:HGNC Symbol;Acc:9186]                        | -3.490746768 | 3.858543033 | 68.34519624 | 1.37E-16 | 1.24E-14 | 4.675958256 | 4.781402895 | 0.365283811  | 0.669468625  | 4.025090588  |
| ENSG00000166851 | PLK1      | polo-like kinase 1 [Source:HGNC Symbol;Acc:9077]                                      | -3.388061065 | 4.19332936  | 67.62361938 | 1.98E-16 | 1.77E-14 | 5.291768997 | 4.976626419 | 1.265630948  | 1.462107232  | 3.940421563  |
| ENSG00000094804 | CDC6      | cell division cycle 6 [Source:HGNC Symbol;Acc:1744]                                   | -3.582669956 | 3.742227221 | 67.58227008 | 2.02E-16 | 1.80E-14 | 4.688554464 | 4.686615325 | 0.328039018  | 0.58582888   | 3.621010335  |
| ENSG00000184792 | OSBP2     | oxysterol binding protein 2 [Source:HGNC Symbol;Acc:8504]                             | -3.130405298 | 4.987369651 | 67.01659442 | 2.69E-16 | 2.39E-14 | 5.654799334 | 6.216720676 | 3.072456242  | 2.303059008  | 4.33330585   |
| ENSG00000066926 | FECH      | ferrochelatase [Source:HGNC Symbol;Acc:3647]                                          | -2.720528273 | 5.941993225 | 66.96998791 | 2.76E-16 | 2.43E-14 | 6.733649303 | 6.911873658 | 4.190675219  | 3.81483761   | 5.581908675  |
| ENSG00000211936 | IGHV4-4   | immunoglobulin heavy variable 4-4 [Source:HGNC Symbol;Acc:5652]                       | -5.409826524 | 6.213570183 | 66.9479529  | 2.79E-16 | 2.45E-14 | 7.700440885 | 6.862967281 | 2.430758609  | -0.525689211 | 5.331839976  |
| ENSG00000174371 | EXO1      | exonuclease 1 [Source:HGNC Symbol;Acc:3511]                                           | -3.702725736 | 3.436670808 | 66.85354851 | 2.92E-16 | 2.55E-14 | 4.567129289 | 4.38195804  | -0.161352853 | -0.244792505 | 2.912863619  |
| ENSG00000165449 | SLC16A9   | solute carrier family 16, member 9 [Source:HGNC Symbol;Acc:23520]                     | -7.014093348 | 2.769762741 | 66.66479453 | 3.22E-16 | 2.80E-14 | 4.180552023 | 3.66113137  | -7.002070102 | -4.730697034 | 1.564363944  |
| ENSG0000024526  | DEPDC1    | DEP domain containing 1 [Source:HGNC Symbol;Acc:22949]                                | -3.882726041 | 3.297394007 | 66.29432302 | 3.88E-16 | 3.36E-14 | 4.425965607 | 4.121805905 | -0.589913612 | -0.525689211 | 3.102938765  |
| ENSG00000143416 | SELENBP1  | selenium binding protein 1 [Source:HGNC Symbol;Acc:10719]                             | -5.137210175 | 5.291106269 | 65.99610991 | 4.52E-16 | 3.89E-14 | 6.14852261  | 6.623913545 | 1.980862385  | -2.419096061 | 4.44068937   |
| ENSG00000167363 | FN3K      | fructosamine 3 kinase [Source:HGNC Symbol;Acc:24822]                                  | -3.255482512 | 4.028285806 | 65.96328478 | 4.59E-16 | 3.93E-14 | 5.103034834 | 5.138021083 | 1.815785154  | 1.0274492    | 2.610226292  |
| ENSG00000139734 | DIAPH3    | diaphanous-related formin 3 [Source:HGNC Symbol;Acc:15480]                            | -4.20583674  | 2.640778252 | 65.83420868 | 4.90E-16 | 4.18E-14 | 3.567603998 | 3.674150053 | -1.57307192  | -1.449512048 | 2.470556253  |
| ENSG00000075218 | GTSE1     | G-2 and S-phase expressed 1 [Source:HGNC Symbol;Acc:13698]                            | -3.584876813 | 3.638194158 | 65.56838713 | 5.61E-16 | 4.76E-14 | 4.586488284 | 4.49985557  | -0.161352853 | 0.192266291  | 3.729524826  |
| ENSG00000211653 | IGLV1-40  | immunoglobulin lambda variable 1-40 [Source:HGNC Symbol;Acc:5877]                     | -5.029898657 | 6.646511673 | 65.4423906  | 5.98E-16 | 5.05E-14 | 7.968086305 | 7.212746789 | 3.061151464  | 0.466186565  | 6.526330041  |
| ENSG00000211650 | IGLV5-45  | immunoglobulin lambda variable 5-45 [Source:HGNC Symbol;Acc:5924]                     | -4.887996513 | 4.189851254 | 64.73293298 | 8.58E-16 | 7.20E-14 | 5.836369856 | 4.741760566 | 0.805492218  | -1.70641174  | 2.32547185   |
| ENSG00000242580 | IGKV1D-43 | immunoglobulin kappa variable 1D-43 [Source:HGNC Symbol;Acc:5758]                     | -4.951977219 | 3.29472274  | 64.69364918 | 8.75E-16 | 7.28E-14 | 4.961930124 | 4.005590473 | -0.27137577  | -3.360122781 | -0.726511138 |
| ENSG00000211970 | IGHV4-61  | immunoglobulin heavy variable 4-61 [Source:HGNC Symbol;Acc:5655]                      | -4.703876609 | 4.904395558 | 64.70279723 | 8.71E-16 | 7.28E-14 | 6.31037526  | 5.65308557  | 1.774850102  | -1.042179808 | 3.986396982  |
| ENSG00000100479 | POLE2     | polymerase (DNA directed), epsilon 2, accessory subunit [Source:HGNC Symbol;Acc:9178] | -3.642152175 | 3.490822414 | 64.17213181 | 1.14E-15 | 9.44E-14 | 4.718695048 | 4.387896921 | 0.28980717   | -0.146146183 | 2.701261324  |
| ENSG00000211972 | IGHV3-66  | immunoglobulin heavy variable 3-66 [Source:HGNC Symbol;Acc:5619]                      | -5.059742633 | 3.742778315 | 63.89809136 | 1.31E-15 | 1.08E-13 | 5.26918452  | 4.204891931 | -0.010608983 | -3.888428289 | 3.102938765  |
| ENSG00000170476 | MZB1      | marginal zone B and B1 cell-specific protein [Source:HGNC Symbol;Acc:30125]           | -3.703517412 | 5.454824835 | 63.76069354 | 1.40E-15 | 1.15E-13 | 6.69225353  | 5.920186567 | 3.083673126  | 1.856429106  | 5.424931915  |
| ENSG00000211939 | IGHV1-8   | immunoglobulin heavy variable 1-8 [Source:HGNC Symbol;Acc:5559]                       | -5.069216122 | 4.00820015  | 63.57774562 | 1.54E-15 | 1.26E-13 | 5.658462756 | 4.766284479 | 0.570569237  | -3.888428289 | -0.201737898 |
| ENSG00000164045 | CDC25A    | cell division cycle 25A [Source:HGNC Symbol;Acc:1725]                                 | -3.573779628 | 3.56553146  | 63.55148338 | 1.56E-15 | 1.27E-13 | 4.702816739 | 4.363993286 | 0.250534523  | 0.03296005   | 3.32911422   |
| ENSG00000211652 | IGLV7-43  | immunoglobulin lambda variable 7-43 [Source:HGNC Symbol;Acc:5929]                     | -4.563831226 | 4.111284162 | 63.27350531 | 1.80E-15 | 1.46E-13 | 5.581437803 | 4.624255851 | 0.858697288  | -1.449512048 | 3.512071509  |
| ENSG00000211666 | IGLV2-14  | immunoglobulin lambda variable 2-14 [Source:HGNC Symbol;Acc:5888]                     | -4.931356822 | 8.037644085 | 62.90733159 | 2.17E-15 | 1.74E-13 | 9.561725963 | 8.782240931 | 4.569443612  | 2.483362921  | 6.462700312  |
| ENSG00000066735 | KIF26A    | kinesin family member 26A [Source:HGNC Symbol;Acc:20226]                              | -3.748897206 | 3.108000808 | 62.31670653 | 2.92E-15 | 2.34E-13 | 4.144433979 | 4.434547869 | -0.589913612 | -0.956081001 | 1.177268129  |
| ENSG00000119888 | EPCAM     | epithelial cell adhesion molecule [Source:HGNC Symbol;Acc:11529]                      | -5.372084099 | 2.838662408 | 62.02659862 | 3.39E-15 | 2.70E-13 | 4.271869887 | 3.740634939 | -3.766908349 | -3.888428289 | 1.3928929    |
| ENSG00000160117 | ANKL1     | ankyrin repeat and LEM domain containing 1 [Source:HGNC Symbol;Acc:26812]             | -2.899779006 | 4.634937862 | 62.01201488 | 3.41E-15 | 2.71E-13 | 5.507195663 | 5.649794134 | 2.340128686  | 2.730566978  | 4.045503588  |
| ENSG00000111665 | CDCA3     | cell division cycle associated 3 [Source:HGNC Symbol;Acc:14624]                       | -3.434174198 | 3.620484939 | 61.76891041 | 3.86E-15 | 3.05E-13 | 4.665073276 | 4.347834625 | 0.471574783  | 0.74852395   | 3.63262208   |
| ENSG00000047597 | XK        | X-linked Kx blood group (McLeod syndrome) [Source:HGNC Symbol;Acc:12811]              | -2.96661067  | 4.951623369 | 61.51869573 | 4.39E-15 | 3.45E-13 | 5.822558176 | 6.045075729 | 2.456873398  | 2.842914522  | 4.255334356  |

|                 |           |                                                                                                              |              |             |             |          |          |             |             |              |              |              |
|-----------------|-----------|--------------------------------------------------------------------------------------------------------------|--------------|-------------|-------------|----------|----------|-------------|-------------|--------------|--------------|--------------|
| ENSG00000197465 | GYPE      | glycophorin E (MNS blood group) [Source:HGNC Symbol;Acc:4705]                                                | -3.650435452 | 3.673154665 | 61.43002923 | 4.59E-15 | 3.60E-13 | 4.572964312 | 4.896964317 | 1.030832979  | -0.655391447 | 2.841278738  |
| ENSG00000162692 | VCAM1     | vascular cell adhesion molecule 1 [Source:HGNC Symbol;Acc:12663]                                             | -4.641977924 | 2.651178911 | 61.24857966 | 5.03E-15 | 3.92E-13 | 4.069366531 | 3.703019536 | -2.845623393 | -2.670141381 | -0.045536284 |
| ENSG00000196517 | SLC6A9    | solute carrier family 6 (neurotransmitter transporter, glycine), member 9 [Source:HGNC Symbol;Acc:11056]     | -4.155260927 | 3.08790157  | 61.17042774 | 5.23E-15 | 4.07E-13 | 3.927796389 | 4.333545794 | -1.886652327 | -2.205328685 | 2.656461736  |
| ENSG00000162599 | NFIA      | nuclear factor I/A [Source:HGNC Symbol;Acc:7784]                                                             | -3.006135664 | 4.15222904  | 61.15532206 | 5.27E-15 | 4.08E-13 | 5.063515567 | 5.139195178 | 1.968813513  | 2.106994346  | 3.545215952  |
| ENSG00000146670 | CDC45     | cell division cycle associated 5 [Source:HGNC Symbol;Acc:14626]                                              | -3.249311236 | 4.189460774 | 60.99151721 | 5.73E-15 | 4.41E-13 | 5.145421644 | 5.021885183 | 1.053829154  | 1.582074621  | 4.167595364  |
| ENSG00000005381 | MPO       | myeloperoxidase [Source:HGNC Symbol;Acc:7218]                                                                | -5.554959054 | 8.964952798 | 60.98191024 | 5.76E-15 | 4.42E-13 | 9.037933614 | 9.543010449 | 2.448220886  | 4.434820745  | 10.22833208  |
| ENSG00000137812 | CASC5     | cancer susceptibility candidate 5 [Source:HGNC Symbol;Acc:24054]                                             | -3.029452879 | 4.33845145  | 60.89250426 | 6.03E-15 | 4.60E-13 | 5.051027549 | 5.287405779 | 1.534439871  | 1.844482366  | 4.46903248   |
| ENSG00000198554 | WDHD1     | WD repeat and HMG-box DNA binding protein 1 [Source:HGNC Symbol;Acc:23170]                                   | -3.021080812 | 4.120209641 | 60.69326871 | 6.67E-15 | 5.07E-13 | 5.041239358 | 5.053365096 | 1.689321579  | 1.462107232  | 3.860382081  |
| ENSG00000163864 | NMNAT3    | nicotinamide nucleotide adenyltransferase 3 [Source:HGNC Symbol;Acc:20989]                                   | -3.2787839   | 3.737453118 | 60.27945342 | 8.23E-15 | 6.23E-13 | 4.865381865 | 4.673709144 | 1.007464306  | 0.894716898  | 2.968901188  |
| ENSG00000171401 | KRT13     | keratin 13 [Source:HGNC Symbol;Acc:6415]                                                                     | -10.6818494  | 2.13415043  | 60.25418027 | 8.34E-15 | 6.28E-13 | 3.495702697 | 3.189723558 | -7.002070102 | -7.002070102 | 0.264147325  |
| ENSG00000107130 | NCS1      | neuronal calcium sensor 1 [Source:HGNC Symbol;Acc:3953]                                                      | -3.631692787 | 3.189556674 | 60.08803467 | 9.07E-15 | 6.81E-13 | 4.373437975 | 4.270652493 | -0.329705368 | -0.797916568 | 1.958084208  |
| ENSG00000211668 | IGLV2-11  | immunoglobulin lambda variable 2-11 [Source:HGNC Symbol;Acc:5887]                                            | -4.826645914 | 6.210595985 | 59.9575024  | 9.69E-15 | 7.24E-13 | 7.700885048 | 6.902915513 | 3.015025135  | 0.369457657  | 5.039358506  |
| ENSG00000035499 | DEPDC1B   | DEP domain containing 1B [Source:HGNC Symbol;Acc:24902]                                                      | -3.410133839 | 3.543300162 | 59.57188229 | 1.18E-14 | 8.77E-13 | 4.592245686 | 4.33149293  | 0.28980717   | 0.192266291  | 3.507847397  |
| ENSG00000130203 | APOE      | apolipoprotein E [Source:HGNC Symbol;Acc:613]                                                                | -4.724536459 | 2.746800647 | 59.4923256  | 1.23E-14 | 9.09E-13 | 4.325853136 | 3.340242669 | -1.721358966 | -2.670141381 | 1.3928929    |
| ENSG00000101003 | GINS1     | GINS complex subunit 1 (Psf1 homolog) [Source:HGNC Symbol;Acc:28980]                                         | -3.331504179 | 3.519524893 | 58.84663728 | 1.70E-14 | 1.26E-12 | 4.52360241  | 4.419164558 | 0.401591237  | 0.301169826  | 3.333864066  |
| ENSG00000130208 | APOC1     | apolipoprotein C-I [Source:HGNC Symbol;Acc:607]                                                              | -5.632786663 | 2.64435536  | 58.80114205 | 1.74E-14 | 1.28E-12 | 4.240439676 | 3.171477064 | -4.621297774 | -3.360122781 | 1.548105377  |
| ENSG00000101447 | FAM83D    | family with sequence similarity 83, member D [Source:HGNC Symbol;Acc:16122]                                  | -3.412905372 | 3.35823291  | 58.67284606 | 1.86E-14 | 1.36E-12 | 4.457849968 | 4.272793714 | 0.365283811  | -0.146146183 | 2.900109607  |
| ENSG00000164692 | COL1A2    | collagen, type I, alpha 2 [Source:HGNC Symbol;Acc:2198]                                                      | -10.84915097 | 2.280112664 | 58.6173852  | 1.92E-14 | 1.40E-12 | 3.64719635  | 3.356486108 | -7.002070102 | -7.002070102 | 0.223773082  |
| ENSG00000140525 | FANCI     | Fanconi anemia, complementation group I [Source:HGNC Symbol;Acc:25568]                                       | -2.579641215 | 5.476841057 | 58.45562772 | 2.08E-14 | 1.51E-12 | 6.250953752 | 6.284611391 | 3.686701825  | 3.427354029  | 5.479534875  |
| ENSG00000240834 | IGKV1D-12 | immunoglobulin kappa variable 1D-12 [Source:HGNC Symbol;Acc:5746]                                            | -4.931587071 | 3.590354752 | 57.91032266 | 2.74E-14 | 1.98E-12 | 5.251101524 | 4.200399454 | 0.125863448  | -7.002070102 | 1.239342106  |
| ENSG00000168496 | FEN1      | flap structure-specific endonuclease 1 [Source:HGNC Symbol;Acc:3650]                                         | -2.699737199 | 5.087522251 | 57.78305927 | 2.93E-14 | 2.11E-12 | 6.019864886 | 5.89816312  | 3.083673126  | 3.415289988  | 4.701801286  |
| ENSG00000211952 | IGHV4-28  | immunoglobulin heavy variable 4-28 [Source:HGNC Symbol;Acc:5645]                                             | -4.496905512 | 2.851522679 | 57.10284055 | 4.14E-14 | 2.96E-12 | 4.175447334 | 3.356486108 | -0.907612816 | -3.888428289 | 2.786891356  |
| ENSG00000072274 | TFRC      | transferrin receptor [Source:HGNC Symbol;Acc:11763]                                                          | -3.686534192 | 9.025753789 | 57.06943081 | 4.21E-14 | 3.00E-12 | 9.881803674 | 10.27208667 | 6.307273993  | 6.411838892  | 8.030306792  |
| ENSG00000116675 | DNAJC6    | Dnaj (Hsp40) homolog, subfamily C, member 6 [Source:HGNC Symbol;Acc:15469]                                   | -3.329805294 | 3.701810891 | 56.9747718  | 4.41E-14 | 3.14E-12 | 4.732663871 | 4.769320864 | 0.437007322  | 1.148991974  | 2.867722395  |
| ENSG00000161888 | SPC24     | SPC24, NDC80 kinetochore complex component [Source:HGNC Symbol;Acc:26913]                                    | -3.51323041  | 3.204608382 | 56.81337688 | 4.79E-14 | 3.39E-12 | 4.245319886 | 4.010731282 | -0.589913612 | -0.525689211 | 3.225574983  |
| ENSG00000093009 | CDC45     | cell division cycle 45 [Source:HGNC Symbol;Acc:1739]                                                         | -3.362440998 | 3.319353069 | 56.65155259 | 5.20E-14 | 3.67E-12 | 4.245319886 | 4.238146865 | -0.329705368 | 0.074465887  | 3.309956893  |
| ENSG00000211896 | IGHG1     | immunoglobulin heavy constant gamma 1 (G1m marker) [Source:HGNC Symbol;Acc:5525]                             | -6.159547317 | 11.45461382 | 56.16685901 | 6.66E-14 | 4.67E-12 | 12.97786904 | 12.12923501 | 6.448999297  | 4.766175279  | 10.4210557   |
| ENSG00000118193 | KIF14     | kinesin family member 14 [Source:HGNC Symbol;Acc:19181]                                                      | -3.388987205 | 3.26509064  | 55.85888204 | 7.79E-14 | 5.45E-12 | 4.141819186 | 4.073491918 | -0.271377577 | -0.350682213 | 3.545215952  |
| ENSG00000174951 | FUT1      | fucosyltransferase 1 (galactoside 2-alpha-L-fucosyltransferase, H blood group) [Source:HGNC Symbol;Acc:4012] | -4.691687598 | 2.414470369 | 55.04514069 | 1.18E-13 | 8.21E-12 | 3.567603998 | 3.431239168 | -2.845623393 | -3.888428289 | 1.802296017  |
| ENSG00000151474 | FRMD4A    | FERM domain containing 4A [Source:HGNC Symbol;Acc:25491]                                                     | -4.360736902 | 2.068470124 | 54.86303876 | 1.29E-13 | 8.97E-12 | 2.907138859 | 3.311369006 | -2.845623393 | -1.70641174  | 1.463945021  |
| ENSG00000099958 | DERL3     | derlin 3 [Source:HGNC Symbol;Acc:14236]                                                                      | -2.967500051 | 4.698454951 | 54.72294432 | 1.39E-13 | 9.59E-12 | 5.873880975 | 5.20794766  | 2.766259878  | 2.346060651  | 4.46254101   |
| ENSG00000184254 | ALDH1A3   | aldehyde dehydrogenase 1 family, member A3 [Source:HGNC Symbol;Acc:409]                                      | -9.851096383 | 1.240962258 | 54.58012393 | 1.49E-13 | 1.03E-11 | 2.778381342 | 2.154261589 | -7.002070102 | -7.002070102 | -2.526883755 |



|                 |           |                                                                                                                |              |             |             |          |          |             |             |              |              |              |
|-----------------|-----------|----------------------------------------------------------------------------------------------------------------|--------------|-------------|-------------|----------|----------|-------------|-------------|--------------|--------------|--------------|
| ENSG00000149554 | CHEK1     | checkpoint kinase 1 [Source:HGNC Symbol;Acc:1925]                                                              | -3.080217712 | 3.849978396 | 54.12887324 | 1.88E-13 | 1.29E-11 | 4.773776708 | 4.665583755 | 0.934997507  | 1.069111613  | 3.912116199  |
| ENSG00000184661 | CDC42     | cell division cycle associated 2 [Source:HGNC Symbol;Acc:14623]                                                | -3.405680832 | 3.086781931 | 54.02792251 | 1.98E-13 | 1.35E-11 | 3.993081991 | 4.061156311 | -0.390491059 | -0.525689211 | 3.016948344  |
| ENSG00000222037 | IGLC6     | immunoglobulin lambda constant 6 (Kern+Oz- marker, gene/pseudogene) [Source:HGNC Symbol;Acc:5860]              | -4.372640559 | 3.690782499 | 53.91283098 | 2.10E-13 | 1.43E-11 | 5.191664033 | 4.220506339 | 0.632982468  | -1.854339469 | 2.861156782  |
| ENSG00000034063 | UHRF1     | ubiquitin-like with PHD and ring finger domains 1 [Source:HGNC Symbol;Acc:12556]                               | -3.190015496 | 3.615842447 | 53.5756173  | 2.49E-13 | 1.69E-11 | 4.007516463 | 4.451660263 | -0.161352853 | 0.301169826  | 4.386854181  |
| ENSG00000211961 | IGHV1-45  | immunoglobulin heavy variable 1-45 [Source:HGNC Symbol;Acc:5553]                                               | -5.027847576 | 2.128974441 | 53.09310262 | 3.18E-13 | 2.15E-11 | 3.687198663 | 2.932364153 | -2.539967122 | -4.730697034 | -0.257803757 |
| ENSG00000211658 | IGLV3-27  | immunoglobulin lambda variable 3-27 [Source:HGNC Symbol;Acc:5910]                                              | -4.384857171 | 2.91438649  | 52.84348036 | 3.61E-13 | 2.43E-11 | 4.215787888 | 3.134276817 | -0.907612816 | -2.97427061  | 3.235762277  |
| ENSG00000211679 | IGLC3     | immunoglobulin lambda constant 3 (Kern-Oz+ marker) [Source:HGNC Symbol;Acc:5857]                               | -5.015447672 | 8.775536552 | 52.60456281 | 4.08E-13 | 2.73E-11 | 10.21383059 | 9.419561065 | 5.213528089  | 3.017993511  | 8.093989886  |
| ENSG00000132646 | PCNA      | proliferating cell nuclear antigen [Source:HGNC Symbol;Acc:8729]                                               | -2.458082023 | 5.285409846 | 52.17754038 | 5.07E-13 | 3.38E-11 | 6.137408525 | 5.992127367 | 3.683019014  | 3.349187152  | 5.233595656  |
| ENSG00000178999 | AURKB     | aurora kinase B [Source:HGNC Symbol;Acc:11390]                                                                 | -3.23661313  | 3.679230864 | 52.01539017 | 5.51E-13 | 3.66E-11 | 4.725696366 | 4.453549171 | 0.570569237  | 1.314027603  | 3.512071509  |
| ENSG00000149516 | MS4A3     | membrane-spanning 4-domains, subfamily A, member 3 (hematopoietic cell-specific) [Source:HGNC Symbol;Acc:7317] | -3.492812588 | 4.535978781 | 51.70808698 | 6.44E-13 | 4.27E-11 | 4.865381865 | 4.505458803 | -0.740035668 | 1.069111613  | 5.935971906  |
| ENSG00000171914 | TLN2      | talin 2 [Source:HGNC Symbol;Acc:15447]                                                                         | -3.262488331 | 2.880768372 | 51.659237   | 6.60E-13 | 4.36E-11 | 3.697918598 | 3.93973528  | 0.036330944  | 0.114810932  | 2.602374247  |
| ENSG00000211946 | IGHV3-20  | immunoglobulin heavy variable 3-20 [Source:HGNC Symbol;Acc:5585]                                               | -4.438603321 | 2.648252902 | 51.56892449 | 6.91E-13 | 4.55E-11 | 4.112739262 | 2.959203556 | -1.202308962 | -2.670141381 | 2.435629945  |
| ENSG00000112759 | SLC29A1   | solute carrier family 29 (equilibrative nucleoside transporter), member 1 [Source:HGNC Symbol;Acc:11003]       | -2.463738764 | 5.716084308 | 51.49920034 | 7.16E-13 | 4.69E-11 | 6.654687631 | 6.601088773 | 3.993665308  | 4.238831357  | 4.900580057  |
| ENSG00000184785 | SMIM10    | small integral membrane protein 10 [Source:HGNC Symbol;Acc:41913]                                              | -3.685432913 | 2.761904977 | 51.21347231 | 8.28E-13 | 5.41E-11 | 3.881526851 | 3.566554811 | -1.315629595 | -0.350682213 | 2.546179737  |
| ENSG00000164626 | KCNK5     | potassium channel, subfamily K, member 5 [Source:HGNC Symbol;Acc:6280]                                         | -3.465391165 | 3.056494479 | 51.19330573 | 8.37E-13 | 5.44E-11 | 4.33045325  | 3.881994713 | -0.66302287  | -0.350682213 | 2.32547185   |
| ENSG00000168477 | TNXB      | tenascin XB [Source:HGNC Symbol;Acc:11976]                                                                     | -2.993975079 | 4.380004099 | 50.99949164 | 9.24E-13 | 5.98E-11 | 4.989823523 | 5.581474026 | 2.448220886  | 1.206127397  | 4.030952405  |
| ENSG00000254395 | IGHV4-55  | immunoglobulin heavy variable 4-55 (pseudogene) [Source:HGNC Symbol;Acc:5653]                                  | -4.751829038 | 2.578577501 | 50.98191756 | 9.32E-13 | 6.02E-11 | 4.007516463 | 2.932364153 | -1.721358966 | -4.730697034 | 2.470556253  |
| ENSG00000187955 | COL14A1   | collagen, type XIV, alpha 1 [Source:HGNC Symbol;Acc:2191]                                                      | -4.552069005 | 2.184834579 | 50.67125364 | 1.09E-12 | 7.02E-11 | 3.628640226 | 3.216667762 | -3.233942493 | -2.97427061  | -0.9858258   |
| ENSG00000211677 | IGLC2     | immunoglobulin lambda constant 2 (Kern-Oz- marker) [Source:HGNC Symbol;Acc:5856]                               | -5.089593407 | 8.113483714 | 50.57244165 | 1.15E-12 | 7.36E-11 | 9.578621645 | 8.737882838 | 4.502066997  | 1.745170531  | 7.382663412  |
| ENSG00000126088 | UROD      | uroporphyrinogen decarboxylase [Source:HGNC Symbol;Acc:12591]                                                  | -2.41878177  | 6.645339848 | 50.53955367 | 1.17E-12 | 7.46E-11 | 7.520157172 | 7.522451483 | 5.161544583  | 5.170781053  | 5.929710319  |
| ENSG00000140403 | DNAJA4    | DnaJ (Hsp40) homolog, subfamily A, member 4 [Source:HGNC Symbol;Acc:14885]                                     | -2.479186135 | 6.474040507 | 50.16420382 | 1.41E-12 | 8.99E-11 | 7.291553494 | 7.45498666  | 5.203280155  | 4.555153026  | 5.691442928  |
| ENSG00000042062 | FAM65C    | family with sequence similarity 65, member C [Source:HGNC Symbol;Acc:16168]                                    | -3.386113395 | 4.732973886 | 49.91897058 | 1.60E-12 | 1.02E-10 | 5.673024125 | 5.827089554 | 0.805492218  | 2.657338701  | 4.068484455  |
| ENSG00000175449 | RFESD     | Rieske (Fe-S) domain containing [Source:HGNC Symbol;Acc:29587]                                                 | -3.105099528 | 3.430184676 | 49.65812065 | 1.83E-12 | 1.16E-10 | 4.484924323 | 4.527146478 | 1.285196495  | -0.053815412 | 2.236956541  |
| ENSG00000198826 | ARHGAP11A | Rho GTPase activating protein 11A [Source:HGNC Symbol;Acc:15783]                                               | -2.406845506 | 4.949287545 | 49.53169342 | 1.95E-12 | 1.23E-10 | 5.714967351 | 5.753866075 | 3.30587588   | 2.800257198  | 4.946271918  |
| ENSG00000143797 | MBOAT2    | membrane bound O-acyltransferase domain containing 2 [Source:HGNC Symbol;Acc:25193]                            | -2.881539291 | 5.591373197 | 49.26957416 | 2.23E-12 | 1.40E-10 | 6.343181631 | 6.509633512 | 2.886421762  | 3.895212931  | 5.529043212  |
| ENSG00000240671 | IGKV1-8   | immunoglobulin kappa variable 1-8 [Source:HGNC Symbol;Acc:5743]                                                | -3.790429946 | 2.938046722 | 49.25871582 | 2.24E-12 | 1.40E-10 | 4.041581121 | 3.229953478 | -0.271377577 | -1.854339469 | 3.473850543  |
| ENSG00000253655 | IGJ1      | immunoglobulin J polypeptide pseudogene 1 [Source:HGNC Symbol;Acc:5714]                                        | -4.477407967 | 4.927007562 | 49.17398101 | 2.34E-12 | 1.46E-10 | 6.48763963  | 5.450457515 | 2.039642018  | -0.956081001 | 3.779126901  |
| ENSG00000211940 | IGHV3-9   | immunoglobulin heavy variable 3-9 [Source:HGNC Symbol;Acc:5628]                                                | -5.894900553 | 5.945926912 | 49.15276843 | 2.37E-12 | 1.47E-10 | 7.64127178  | 6.697489003 | 2.004662384  | -3.888428289 | -1.3021922   |
| ENSG00000134690 | CDC48     | cell division cycle associated 8 [Source:HGNC Symbol;Acc:14629]                                                | -2.997183338 | 3.674531095 | 49.11094995 | 2.42E-12 | 1.50E-10 | 4.681370103 | 4.48158997  | 0.934997507  | 1.12943269   | 3.516256447  |
| ENSG00000211651 | IGLV1-44  | immunoglobulin lambda variable 1-44 [Source:HGNC Symbol;Acc:5879]                                              | -5.202984192 | 6.871567366 | 49.00941927 | 2.55E-12 | 1.57E-10 | 8.208051042 | 7.410948087 | 3.262115839  | -0.194626373 | 6.766161721  |

|                 |               |                                                                                                                         |              |             |             |          |          |              |              |              |              |              |
|-----------------|---------------|-------------------------------------------------------------------------------------------------------------------------|--------------|-------------|-------------|----------|----------|--------------|--------------|--------------|--------------|--------------|
| ENSG00000171320 | ESCO2         | establishment of sister chromatid cohesion N-acetyltransferase 2 [Source:HGNC Symbol;Acc:27230]                         | -3.152366257 | 3.194195304 | 48.99778333 | 2.56E-12 | 1.57E-10 | 4.154846016  | 4.105079432  | -0.215316613 | 0.154058352  | 3.080504462  |
| ENSG00000144485 | HES6          | hes family bHLH transcription factor 6 [Source:HGNC Symbol;Acc:18254]                                                   | -3.576612049 | 4.071085726 | 48.92086864 | 2.67E-12 | 1.63E-10 | 5.404045254  | 4.836002619  | 0.9100098    | 2.003353492  | 2.793802967  |
| ENSG00000091513 | TF            | transferrin [Source:HGNC Symbol;Acc:11740]                                                                              | -4.248961518 | 2.688963177 | 48.79379469 | 2.84E-12 | 1.73E-10 | 4.332747819  | 3.423550355  | -2.539967122 | -1.854339469 | -0.726511138 |
| ENSG00000184185 | KCNJ12        | potassium inwardly-rectifying channel, subfamily J, member 12 [Source:HGNC Symbol;Acc:6258]                             | -3.812435705 | 2.67376146  | 48.23754852 | 3.78E-12 | 2.29E-10 | 3.957838374  | 3.810099846  | -3.233942493 | -1.231517591 | 0.551948963  |
| ENSG00000105205 | CLC           | Charcot-Leyden crystal galectin [Source:HGNC Symbol;Acc:2014]                                                           | -3.723052554 | 3.133710762 | 48.14982437 | 3.95E-12 | 2.39E-10 | 4.509472944  | 3.457831828  | 0.125863448  | -0.655391447 | 3.02284327   |
| ENSG00000143228 | NUF2          | NUF2, NDC80 kinetochore complex component [Source:HGNC Symbol;Acc:14621]                                                | -2.935157602 | 3.677098625 | 48.01645622 | 4.23E-12 | 2.55E-10 | 4.661426622  | 4.395777591  | 1.285196495  | 0.798919003  | 3.715033827  |
| ENSG00000137460 | FHDC1         | FH2 domain containing 1 [Source:HGNC Symbol;Acc:29363]                                                                  | -3.334493673 | 3.797269233 | 47.64307252 | 5.11E-12 | 3.07E-10 | 4.466234785  | 5.002662158  | -0.329705368 | 1.206127397  | 3.573605569  |
| ENSG00000004939 | SLC4A1        | solute carrier family 4 (anion exchanger), member 1 (Diego blood group) [Source:HGNC Symbol;Acc:11027]                  | -5.898874378 | 7.368698236 | 47.57336609 | 5.30E-12 | 3.17E-10 | 7.60660933   | 8.990021765  | 3.46445507   | -1.133744865 | 6.795727645  |
| ENSG00000167815 | PRDX2         | peroxiredoxin 2 [Source:HGNC Symbol;Acc:9353]                                                                           | -3.137875941 | 6.211486909 | 47.29242114 | 6.11E-12 | 3.65E-10 | 7.228257247  | 7.199863678  | 4.722595709  | 3.193073383  | 5.236135087  |
| ENSG00000076003 | MCM6          | minichromosome maintenance complex component 6 [Source:HGNC Symbol;Acc:6949]                                            | -2.391379723 | 6.022347552 | 47.25886463 | 6.22E-12 | 3.70E-10 | 6.811394892  | 6.731359671  | 4.652765747  | 3.857072211  | 6.055095074  |
| ENSG00000175063 | UBE2C         | ubiquitin-conjugating enzyme E2C [Source:HGNC Symbol;Acc:15937]                                                         | -3.382187395 | 2.897876308 | 47.06630526 | 6.86E-12 | 4.07E-10 | 4.074859969  | 3.597635769  | -0.740035668 | 0.192266291  | 2.648857997  |
| ENSG00000164741 | DLC1          | deleted in liver cancer 1 [Source:HGNC Symbol;Acc:2897]                                                                 | -3.023649787 | 3.046650007 | 47.04315913 | 6.94E-12 | 4.10E-10 | 4.052759582  | 4.036164092  | 0.505333341  | 0.669468625  | 2.31590077   |
| ENSG00000211968 | IGHV1-58      | immunoglobulin heavy variable 1-58 [Source:HGNC Symbol;Acc:5555]                                                        | -4.319743339 | 2.250906933 | 46.97569572 | 7.19E-12 | 4.23E-10 | 3.559789652  | 2.632310473  | -2.287883461 | -2.670141381 | 2.372397358  |
| ENSG00000077943 | ITGAB         | integrin, alpha 8 [Source:HGNC Symbol;Acc:6144]                                                                         | -10.29327611 | 1.656659832 | 46.69972823 | 8.27E-12 | 4.86E-10 | 3.150283373  | 2.557000471  | -7.002070102 | -7.002070102 | -0.57637152  |
| ENSG00000115107 | STEAP3        | STEAP family member 3, metalloredutase [Source:HGNC Symbol;Acc:24592]                                                   | -2.743288408 | 5.133011584 | 46.67261866 | 8.39E-12 | 4.91E-10 | 5.897324146  | 6.182392918  | 2.580794782  | 3.43534104   | 4.705471168  |
| ENSG00000073464 | CLCN4         | chloride channel, voltage-sensitive 4 [Source:HGNC Symbol;Acc:2022]                                                     | -2.614895366 | 4.344627941 | 46.35404793 | 9.87E-12 | 5.76E-10 | 5.136255356  | 5.402371952  | 2.096120255  | 2.572971709  | 3.761606998  |
| ENSG00000164877 | MICALL2       | MICAL-like 2 [Source:HGNC Symbol;Acc:29672]                                                                             | -2.599823257 | 4.196951389 | 46.15310455 | 1.09E-11 | 6.36E-10 | 5.015760478  | 5.173980935  | 2.016416749  | 2.156150191  | 3.850471957  |
| ENSG00000087586 | AURKA         | aurora kinase A [Source:HGNC Symbol;Acc:11393]                                                                          | -2.832053369 | 3.379718241 | 46.07469892 | 1.14E-11 | 6.59E-10 | 4.360001702  | 4.30453643   | 1.120696904  | 0.61425099   | 2.950462792  |
| ENSG00000165304 | MELK          | maternal embryonic leucine zipper kinase [Source:HGNC Symbol;Acc:16870]                                                 | -3.060894767 | 3.051873322 | 46.01414056 | 1.17E-11 | 6.78E-10 | 3.930828895  | 3.912527782  | 0.168628767  | -0.194626373 | 3.146787158  |
| ENSG00000237810 | CTD-2571E19.3 |                                                                                                                         | -3.620818073 | 2.262454821 | 45.91110113 | 1.24E-11 | 7.12E-10 | 3.411370615  | 3.081507914  | -1.57307192  | -1.336401299 | 1.945725455  |
| ENSG00000100362 | PVALB         | parvalbumin [Source:HGNC Symbol;Acc:9704]                                                                               | 6.114606514  | -0.57512767 | 45.52969637 | 1.50E-11 | 8.63E-10 | -4.650190627 | -4.777156855 | -2.073364206 | 0.434658742  | 0.518960621  |
| ENSG00000214009 | PCNAP3        | proliferating cell nuclear antigen pseudogene 3 [Source:HGNC Symbol;Acc:43736]                                          | -2.3168236   | 4.875714686 | 45.47937385 | 1.54E-11 | 8.82E-10 | 5.66758082   | 5.679957148  | 3.271955645  | 2.756300061  | 4.806321398  |
| ENSG00000117632 | STMN1         | stathmin 1 [Source:HGNC Symbol;Acc:6510]                                                                                | -2.505893967 | 6.446667947 | 45.05885325 | 1.91E-11 | 1.09E-09 | 7.221772163  | 6.991063891  | 4.967809772  | 4.154255136  | 6.784928124  |
| ENSG00000168268 | NT5DC2        | 5'-nucleotidase domain containing 2 [Source:HGNC Symbol;Acc:25717]                                                      | -2.524239359 | 4.293413779 | 44.99979101 | 1.97E-11 | 1.12E-09 | 5.276354728  | 4.950112174  | 2.37706662   | 2.354509285  | 4.151542524  |
| ENSG00000214049 | UCA1          | urothelial cancer associated 1 (non-protein coding) [Source:HGNC Symbol;Acc:37126]                                      | -4.452189696 | 1.950941401 | 44.82091273 | 2.16E-11 | 1.22E-09 | 3.15547772   | 3.006291013  | -4.621297774 | -2.670141381 | 0.898226269  |
| ENSG00000132465 | IGJ           | immunoglobulin J polypeptide, linker protein for immunoglobulin alpha and mu polypeptides [Source:HGNC Symbol;Acc:5713] | -4.804836014 | 7.929098313 | 44.79675252 | 2.19E-11 | 1.23E-09 | 9.434166502  | 8.528594032  | 5.085469664  | 2.175352965  | 6.892269576  |
| ENSG00000213177 | PRDX2P4       | peroxiredoxin 2 pseudogene 4 [Source:HGNC Symbol;Acc:44969]                                                             | -2.910232029 | 5.724424493 | 44.74302193 | 2.25E-11 | 1.26E-09 | 6.69270022   | 6.788223555  | 4.148568005  | 2.528862927  | 4.730902235  |
| ENSG00000215049 | PRDX2P1       | peroxiredoxin 2 pseudogene 1 [Source:HGNC Symbol;Acc:30020]                                                             | -2.846536747 | 4.663818747 | 44.73450769 | 2.26E-11 | 1.27E-09 | 5.69993678   | 5.640703774  | 3.061151464  | 1.538247531  | 3.733124947  |
| ENSG00000151725 | CENPU         | centromere protein U [Source:HGNC Symbol;Acc:21348]                                                                     | -2.880415495 | 3.809699403 | 44.45859719 | 2.60E-11 | 1.45E-09 | 4.843020085  | 4.670464478  | 1.053829154  | 1.493047208  | 3.425717652  |
| ENSG00000256663 | RP11-424C20.2 |                                                                                                                         | -3.219283089 | 3.427791987 | 44.23068018 | 2.92E-11 | 1.63E-09 | 3.897115495  | 4.211604524  | -0.453950945 | 0.642123966  | 4.154230432  |
| ENSG00000215580 | BCORP1        | BCL6 corepressor pseudogene 1 [Source:HGNC Symbol;Acc:23953]                                                            | 9.626099804  | 1.412938588 | 44.08552609 | 3.14E-11 | 1.75E-09 | -7.002070102 | -7.002070102 | -7.002070102 | 1.926103707  | 3.215315242  |
| ENSG00000085999 | RAD54L        | RAD54-like (S. cerevisiae) [Source:HGNC Symbol;Acc:9826]                                                                | -3.099181079 | 2.950923015 | 44.02098854 | 3.25E-11 | 1.80E-09 | 3.884658084  | 3.664397071  | -0.589913612 | -0.194626373 | 3.230677622  |

|                 |          |                                                                                                                                                  |              |              |             |          |          |              |              |              |              |              |
|-----------------|----------|--------------------------------------------------------------------------------------------------------------------------------------------------|--------------|--------------|-------------|----------|----------|--------------|--------------|--------------|--------------|--------------|
| ENSG00000164237 | CMBL     | carboxymethylglutamate lyase (Pseudomonas) [Source:HGNC Symbol;Acc:25090]                                                                        | -3.219469271 | 3.278289094  | 43.99157737 | 3.30E-11 | 1.82E-09 | 4.464143145  | 4.033640892  | -0.589913612 | 0.61425099   | 2.919198591  |
| ENSG00000076382 | SPAG5    | sperm associated antigen 5 [Source:HGNC Symbol;Acc:13452]                                                                                        | -2.387189873 | 4.575766026  | 43.75629597 | 3.72E-11 | 2.05E-09 | 5.259568469  | 5.463639162  | 2.642776537  | 2.724061344  | 4.563054379  |
| ENSG00000162063 | CCNF     | cyclin F [Source:HGNC Symbol;Acc:1591]                                                                                                           | -2.528688954 | 4.139369456  | 43.52546647 | 4.18E-11 | 2.30E-09 | 4.939521629  | 5.03708129   | 2.404162378  | 1.65228493   | 3.986396982  |
| ENSG00000118113 | MMP8     | matrix metalloproteinase 8 (neutrophil collagenase) [Source:HGNC Symbol;Acc:7175]                                                                | -3.854048087 | 5.294282011  | 43.33663236 | 4.61E-11 | 2.51E-09 | 5.869936475  | 4.003013182  | 1.163613388  | 0.696304622  | 6.878518871  |
| ENSG00000254244 | PAICSP4  | phosphoribosylaminoimidazole carboxylase, phosphoribosylaminoimidazole succinocarboxamide synthetase pseudogene 4 [Source:HGNC Symbol;Acc:38097] | -2.424940348 | 4.927097701  | 43.33549042 | 4.61E-11 | 2.51E-09 | 5.884868544  | 5.64732062   | 3.506736406  | 2.580193821  | 4.658912683  |
| ENSG00000235169 | SMIM1    | small integral membrane protein 1 (Vel blood group) [Source:HGNC Symbol;Acc:44204]                                                               | -3.154006475 | 2.428984707  | 43.24763776 | 4.82E-11 | 2.62E-09 | 3.536089402  | 3.476530889  | -0.271377577 | -0.194626373 | 1.11240278   |
| ENSG00000211890 | IGHA2    | immunoglobulin heavy constant alpha 2 (A2m marker) [Source:HGNC Symbol;Acc:5479]                                                                 | -4.554279313 | 7.807400896  | 43.10500502 | 5.19E-11 | 2.81E-09 | 9.106923328  | 8.279054341  | 4.966295509  | 2.249705807  | 7.792661161  |
| ENSG00000131153 | GINS2    | GINS complex subunit 2 (Psf2 homolog) [Source:HGNC Symbol;Acc:24575]                                                                             | -3.125930774 | 2.704757814  | 43.0509546  | 5.33E-11 | 2.88E-09 | 3.736557285  | 3.516835107  | -0.589913612 | -0.350682213 | 2.602374247  |
| ENSG00000077152 | UBE2T    | ubiquitin-conjugating enzyme E2T (putative) [Source:HGNC Symbol;Acc:25009]                                                                       | -2.813833146 | 3.332946811  | 42.98952165 | 5.50E-11 | 2.96E-09 | 4.459950745  | 4.088156756  | 1.076464519  | 0.917704421  | 2.821122975  |
| ENSG00000109255 | NMU      | neuromedin U [Source:HGNC Symbol;Acc:7859]                                                                                                       | -5.161023161 | 2.479999119  | 42.96803363 | 5.56E-11 | 2.99E-09 | 4.215787888  | 2.916017525  | -2.845623393 | -7.002070102 | 0.415212929  |
| ENSG00000004799 | PK4      | pyruvate dehydrogenase kinase, isozyme 4 [Source:HGNC Symbol;Acc:8812]                                                                           | 2.263029826  | 5.39411854   | 42.91483723 | 5.72E-11 | 3.06E-09 | 3.794307631  | 4.078396779  | 5.870591667  | 6.061972391  | 5.753027148  |
| ENSG00000100526 | CDKN3    | cyclin-dependent kinase inhibitor 3 [Source:HGNC Symbol;Acc:1791]                                                                                | -2.908876918 | 3.001963766  | 42.85311627 | 5.90E-11 | 3.15E-09 | 3.995980462  | 3.839289117  | 0.437007322  | -0.053815412 | 2.841278738  |
| ENSG00000142731 | PLK4     | polo-like kinase 4 [Source:HGNC Symbol;Acc:11397]                                                                                                | -2.631417268 | 4.104233508  | 42.77884981 | 6.13E-11 | 3.26E-09 | 4.921340809  | 4.929901731  | 1.732719555  | 2.003353492  | 4.135309052  |
| ENSG00000128050 | PAICS    | phosphoribosylaminoimidazole carboxylase, phosphoribosylaminoimidazole succinocarboxamide synthetase [Source:HGNC Symbol;Acc:8587]               | -2.179570911 | 5.819591605  | 42.75045634 | 6.22E-11 | 3.30E-09 | 6.626909194  | 6.623494129  | 4.635719974  | 3.985013877  | 5.457941045  |
| ENSG00000100162 | CENPM    | centromere protein M [Source:HGNC Symbol;Acc:18352]                                                                                              | -2.859745603 | 2.994806245  | 42.66061667 | 6.51E-11 | 3.44E-09 | 3.948891281  | 3.853665234  | 0.632982468  | 0.301169826  | 2.779946473  |
| ENSG00000128683 | GAD1     | glutamate decarboxylase 1 (brain, 67kDa) [Source:HGNC Symbol;Acc:4092]                                                                           | -9.536341807 | 0.991152044  | 42.53553153 | 6.94E-11 | 3.66E-09 | 2.429680882  | 1.607225949  | -7.002070102 | -7.002070102 | 0.264147325  |
| ENSG00000214357 | NEURL1B  | neuralized E3 ubiquitin protein ligase 1B [Source:HGNC Symbol;Acc:35422]                                                                         | -2.799439352 | 3.236148426  | 42.10156912 | 8.67E-11 | 4.55E-09 | 4.178001936  | 4.114661149  | 0.570569237  | 0.556835562  | 3.074840951  |
| ENSG00000228716 | DHFR     | dihydrofolate reductase [Source:HGNC Symbol;Acc:2861]                                                                                            | -2.144377924 | 5.237230454  | 41.83806434 | 9.92E-11 | 5.20E-09 | 5.911209348  | 6.153052141  | 3.869549403  | 3.501502523  | 4.954005614  |
| ENSG00000211664 | IGLV2-18 | immunoglobulin lambda variable 2-18 [Source:HGNC Symbol;Acc:5889]                                                                                | -4.332741951 | 2.106899174  | 41.61372192 | 1.11E-10 | 5.80E-09 | 3.507937861  | 2.401300588  | -2.539967122 | -2.97427061  | 2.109797605  |
| ENSG00000162337 | LRP5     | low density lipoprotein receptor-related protein 5 [Source:HGNC Symbol;Acc:6697]                                                                 | -2.748735894 | 3.466526225  | 41.61019781 | 1.11E-10 | 5.80E-09 | 4.43453724   | 4.349864383  | 1.432844522  | 0.669468625  | 3.114026435  |
| ENSG00000051180 | RAD51    | RAD51 recombinase [Source:HGNC Symbol;Acc:9817]                                                                                                  | -2.895485208 | 3.019057066  | 41.47948498 | 1.19E-10 | 6.19E-09 | 3.84019003   | 3.90149947   | -0.10933503  | 0.154058352  | 3.157544141  |
| ENSG00000154620 | TMSB4Y   | thymosin beta 4, Y-linked [Source:HGNC Symbol;Acc:11882]                                                                                         | 9.283181139  | 0.22920686   | 41.37677561 | 1.26E-10 | 6.50E-09 | -7.002070102 | -7.002070102 | -4.621297774 | 1.692827451  | 1.198257616  |
| ENSG00000171241 | SHCBP1   | SHC SH2-domain binding protein 1 [Source:HGNC Symbol;Acc:29547]                                                                                  | -2.643566308 | 3.953264864  | 41.25528102 | 1.34E-10 | 6.90E-09 | 4.761906008  | 4.817053504  | 1.415193986  | 1.79568083   | 3.971234054  |
| ENSG00000173898 | SPTBN2   | spectrin, beta, non-erythrocytic 2 [Source:HGNC Symbol;Acc:11276]                                                                                | -3.262370633 | 3.532553363  | 41.06155109 | 1.48E-10 | 7.59E-09 | 4.661426622  | 4.564332671  | -1.57307192  | 1.168289627  | 2.586540774  |
| ENSG00000211644 | IGLV1-51 | immunoglobulin lambda variable 1-51 [Source:HGNC Symbol;Acc:5882]                                                                                | -3.910821489 | 3.606744294  | 40.66898153 | 1.80E-10 | 9.26E-09 | 5.010036873  | 4.090586468  | 1.007464306  | -1.854339469 | 3.184090844  |
| ENSG00000167325 | RRM1     | ribonucleotide reductase M1 [Source:HGNC Symbol;Acc:10451]                                                                                       | -2.13713607  | 5.896649132  | 40.42218473 | 2.05E-10 | 1.05E-08 | 6.639939052  | 6.610431387  | 4.724388461  | 4.038427289  | 5.839903917  |
| ENSG00000136542 | GALNT5   | UDP-N-acetyl-alpha-D-galactosamine:polypeptide N-acetylgalactosaminyltransferase 5 (GalNAc-T5) [Source:HGNC Symbol;Acc:4127]                     | -5.868594767 | 1.61157069   | 40.12697239 | 2.38E-10 | 1.21E-08 | 2.80506858   | 2.860151049  | -4.621297774 | -7.002070102 | -0.649489103 |
| ENSG00000144130 | NTSDC4   | 5'-nucleotidase domain containing 4 [Source:HGNC Symbol;Acc:27678]                                                                               | 5.023879403  | -0.485649494 | 40.09691348 | 2.42E-10 | 1.23E-08 | -3.79890385  | -3.414167066 | -1.315629595 | 0.527247606  | 0.378903451  |

|                 |               |                                                                                               |              |              |             |          |          |              |              |              |              |              |
|-----------------|---------------|-----------------------------------------------------------------------------------------------|--------------|--------------|-------------|----------|----------|--------------|--------------|--------------|--------------|--------------|
| ENSG00000088340 | FER1L4        | fer-1-like 4 (C. elegans), pseudogene [Source:HGNC Symbol;Acc:15801]                          | -3.532204313 | 2.766130002  | 40.05988959 | 2.46E-10 | 1.25E-08 | 4.072115865  | 3.446494941  | -0.453950945 | -2.97427061  | 2.363133567  |
| ENSG00000183111 | ARHGFB37      | Rho guanine nucleotide exchange factor (GEF) 37 [Source:HGNC Symbol;Acc:34430]                | -3.345840281 | 2.330808675  | 40.03607803 | 2.49E-10 | 1.26E-08 | 3.216393469  | 3.534789485  | -1.315629595 | -1.854339469 | 1.702990823  |
| ENSG00000180537 | RNF182        | ring finger protein 182 [Source:HGNC Symbol;Acc:28522]                                        | -3.880621039 | 2.213440885  | 40.02515056 | 2.51E-10 | 1.26E-08 | 3.458362025  | 3.110529943  | -3.233942493 | -2.419096061 | 1.564363944  |
| ENSG00000213959 | RP5-1100H13.3 |                                                                                               | -3.616622907 | 1.962214851  | 39.96417163 | 2.59E-10 | 1.30E-08 | 3.042264405  | 2.837184307  | -2.539967122 | -1.449512048 | 1.702990823  |
| ENSG00000168447 | SCNN1B        | sodium channel, non-voltage-gated 1, beta subunit [Source:HGNC Symbol;Acc:10600]              | -9.003121511 | 0.393161012  | 39.8729806  | 2.71E-10 | 1.36E-08 | 1.752861822  | 1.339492543  | -7.002070102 | -7.002070102 | -1.55968627  |
| ENSG00000166147 | FBN1          | fibrillin 1 [Source:HGNC Symbol;Acc:3603]                                                     | -2.984241789 | 2.984012712  | 39.46814515 | 3.33E-10 | 1.67E-08 | 4.170324518  | 3.92347243   | -0.329705368 | 0.798919003  | 1.81594051   |
| ENSG00000080819 | CPOX          | coproporphyrinogen oxidase [Source:HGNC Symbol;Acc:2321]                                      | -2.026015378 | 5.657254672  | 39.28803416 | 3.66E-10 | 1.82E-08 | 6.291625332  | 6.570082921  | 4.535127562  | 4.066983011  | 5.274935181  |
| ENSG00000136824 | SMC2          | structural maintenance of chromosomes 2 [Source:HGNC Symbol;Acc:14011]                        | -2.075291789 | 5.504726319  | 39.06673637 | 4.10E-10 | 2.04E-08 | 6.100853092  | 6.29201996   | 4.321978924  | 3.60780319   | 5.570886009  |
| ENSG00000017483 | SLC38A5       | solute carrier family 38, member 5 [Source:HGNC Symbol;Acc:18070]                             | -2.676270765 | 5.31443829   | 39.02323579 | 4.19E-10 | 2.08E-08 | 6.241825604  | 6.25621489   | 4.096915113  | 2.580193821  | 4.550866558  |
| ENSG00000080986 | NDC80         | NDC80 kinetochore complex component [Source:HGNC Symbol;Acc:16909]                            | -2.513536556 | 3.816675865  | 38.91732503 | 4.42E-10 | 2.19E-08 | 4.674149786  | 4.659050332  | 2.118106677  | 1.168289627  | 3.674416329  |
| ENSG00000118523 | CTGF          | connective tissue growth factor [Source:HGNC Symbol;Acc:2500]                                 | -9.794228633 | 1.288322115  | 38.86404692 | 4.54E-10 | 2.24E-08 | 2.730456787  | 2.163523194  | -7.002070102 | -7.002070102 | -0.376928291 |
| ENSG00000110400 | PVRL1         | poliovirus receptor-related 1 (herpesvirus entry mediator C) [Source:HGNC Symbol;Acc:9706]    | -2.235297658 | 5.495525533  | 38.83979315 | 4.60E-10 | 2.26E-08 | 6.284530805  | 6.296236409  | 3.694039364  | 4.283760478  | 5.181845156  |
| ENSG00000177324 | BEND2         | BEN domain containing 2 [Source:HGNC Symbol;Acc:28509]                                        | 3.58690193   | 2.872956123  | 38.64922442 | 5.07E-10 | 2.49E-08 | 0.401371743  | 1.050973916  | 2.814185793  | 4.192457932  | 2.93178569   |
| ENSG00000204385 | SLC44A4       | solute carrier family 44, member 4 [Source:HGNC Symbol;Acc:13941]                             | -4.689491111 | 1.763900245  | 38.41013103 | 5.73E-10 | 2.80E-08 | 3.08644716   | 2.932364153  | -4.621297774 | -3.888428289 | -1.3021922   |
| ENSG00000242550 | SERPINB10     | serpin peptidase inhibitor, clade B (ovalbumin), member 10 [Source:HGNC Symbol;Acc:8942]      | -2.637141936 | 3.759197196  | 38.1829641  | 6.44E-10 | 3.14E-08 | 4.304969154  | 4.403615446  | 1.746900214  | 0.335717742  | 4.451656561  |
| ENSG00000123473 | STIL          | SCL/TAL1 interrupting locus [Source:HGNC Symbol;Acc:10879]                                    | -2.514318483 | 3.649540726  | 38.11489472 | 6.67E-10 | 3.24E-08 | 4.511499931  | 4.550279288  | 1.501363361  | 1.477660161  | 3.403296679  |
| ENSG00000047457 | CP            | ceruloplasmin (ferroxidase) [Source:HGNC Symbol;Acc:2295]                                     | -4.179282876 | 2.040509193  | 38.03761239 | 6.94E-10 | 3.37E-08 | 3.54006658   | 2.948527637  | -4.621297774 | -2.419096061 | -0.57637152  |
| ENSG00000112312 | GMNN          | geminin, DNA replication inhibitor [Source:HGNC Symbol;Acc:17493]                             | -2.566696618 | 3.861707415  | 38.02546173 | 6.98E-10 | 3.38E-08 | 4.975210034  | 4.514534988  | 1.815785154  | 1.880029835  | 3.443406881  |
| ENSG00000118513 | MYB           | v-myb avian myeloblastosis viral oncogene homolog [Source:HGNC Symbol;Acc:7545]               | -2.811439606 | 5.708929199  | 37.91295642 | 7.40E-10 | 3.57E-08 | 6.507579784  | 6.323346988  | 2.687575605  | 3.848125445  | 6.115649361  |
| ENSG00000252090 | CTC-820M8.1   |                                                                                               | -3.171986091 | 2.301010599  | 37.67329883 | 8.36E-10 | 4.02E-08 | 3.371751013  | 3.061830389  | -1.202308962 | -0.46496394  | 2.164148811  |
| ENSG00000127589 | TUBBP1        | tubulin, beta pseudogene 1 [Source:HGNC Symbol;Acc:12414]                                     | -2.045652472 | 6.378496929  | 37.51524016 | 9.07E-10 | 4.35E-08 | 7.121490019  | 7.090008309  | 4.9201124    | 5.019609773  | 6.276024361  |
| ENSG00000101938 | CHRD1         | chordin-like 1 [Source:HGNC Symbol;Acc:29861]                                                 | -5.147307529 | 1.646762345  | 37.49305898 | 9.17E-10 | 4.39E-08 | 3.047861816  | 2.535760257  | -7.002070102 | -3.888428289 | 0.264147325  |
| ENSG00000123975 | CKS2          | CDC28 protein kinase regulatory subunit 2 [Source:HGNC Symbol;Acc:2000]                       | -2.737579349 | 3.423267612  | 37.44232251 | 9.42E-10 | 4.49E-08 | 4.597980204  | 4.026044706  | 1.030832979  | 1.414416401  | 3.02284327   |
| ENSG00000117411 | B4GALT2       | UDP-Gal:betaGlcNAc beta 1,4-galactosyltransferase, polypeptide 2 [Source:HGNC Symbol;Acc:925] | -2.571009307 | 3.241873035  | 37.21663307 | 1.06E-09 | 5.03E-08 | 4.276645101  | 4.138340674  | 1.163613388  | 0.984547783  | 2.529713762  |
| ENSG00000213088 | DARC          | Duffy blood group, atypical chemokine receptor [Source:HGNC Symbol;Acc:4035]                  | -4.652760622 | 1.512940133  | 36.88707157 | 1.25E-09 | 5.93E-08 | 2.394966414  | 2.772072928  | -3.766908349 | -4.730697034 | 0.791775511  |
| ENSG00000255075 | RP11-2387.3   |                                                                                               | -2.966993656 | 2.566774249  | 36.88620859 | 1.25E-09 | 5.93E-08 | 3.650879106  | 3.516835107  | -0.329705368 | 0.154058352  | 1.760570749  |
| ENSG00000211630 | IGKV1D-13     | immunoglobulin kappa variable 1D-13 [Source:HGNC Symbol;Acc:5747]                             | -3.405627817 | 2.874308625  | 36.84493712 | 1.28E-09 | 6.04E-08 | 3.636091341  | 3.143667191  | -2.845623393 | -0.296766077 | 3.827080113  |
| ENSG00000154839 | SKA1          | spindle and kinetochore associated complex subunit 1 [Source:HGNC Symbol;Acc:28109]           | -2.754821706 | 2.812316036  | 36.64285376 | 1.42E-09 | 6.68E-08 | 3.665516831  | 3.756023105  | -0.059127673 | 0.154058352  | 2.708594515  |
| ENSG00000257331 | RP11-47889.3  |                                                                                               | -2.415520832 | 3.705905943  | 36.48570321 | 1.54E-09 | 7.22E-08 | 4.60748737   | 4.455435609  | 2.016416749  | 1.65228493   | 3.516256447  |
| ENSG00000182512 | GLRX5         | glutaredoxin 5 [Source:HGNC Symbol;Acc:20134]                                                 | -2.003217172 | 5.426901403  | 36.36982748 | 1.63E-09 | 7.64E-08 | 6.186444049  | 6.24207749   | 4.286013837  | 4.074673831  | 4.902179967  |
| ENSG00000154917 | RAB6B         | RAB6B, member RAS oncogene family [Source:HGNC Symbol;Acc:14902]                              | -2.559531049 | 3.274367861  | 36.2518356  | 1.73E-09 | 8.10E-08 | 4.033140065  | 4.444079802  | 0.934997507  | 1.187332556  | 2.513057684  |
| ENSG00000231535 | LINC00278     | long intergenic non-protein coding RNA 278 [Source:HGNC Symbol;Acc:38712]                     | 8.903429359  | -0.349526206 | 36.00855492 | 1.96E-09 | 9.15E-08 | -7.002070102 | -7.002070102 | -7.002070102 | 1.12943269   | 0.518960621  |
| ENSG00000167244 | IGF2          | insulin-like growth factor 2 (somatomedin A) [Source:HGNC Symbol;Acc:5466]                    | -5.242500763 | 1.327251199  | 35.95560555 | 2.02E-09 | 9.37E-08 | 2.882290283  | 2.163523194  | -7.002070102 | -3.888428289 | -1.70800759  |
| ENSG00000115163 | CENPA         | centromere protein A [Source:HGNC Symbol;Acc:1851]                                            | -3.340015743 | 2.351055638  | 35.94913741 | 2.03E-09 | 9.38E-08 | 3.407021786  | 3.120075649  | -2.539967122 | -1.449512048 | 2.426764636  |
| ENSG00000129810 | SGOL1         | shugoshin-like 1 (S. pombe) [Source:HGNC Symbol;Acc:25088]                                    | -2.780471427 | 2.684909638  | 35.8501209  | 2.13E-09 | 9.82E-08 | 3.669153174  | 3.487635086  | 0.036330944  | -0.350682213 | 2.610226292  |

|                 |                |                                                                                                             |              |              |             |          |          |              |              |              |              |              |
|-----------------|----------------|-------------------------------------------------------------------------------------------------------------|--------------|--------------|-------------|----------|----------|--------------|--------------|--------------|--------------|--------------|
| ENSG00000157404 | KIT            | v-kit Hardy-Zuckerman 4 feline sarcoma viral oncogene homolog [Source:HGNC Symbol;Acc:6342]                 | -2.718878364 | 3.836745806  | 35.85519659 | 2.13E-09 | 9.82E-08 | 4.834948985  | 4.08084297   | 1.304500245  | 1.242998101  | 4.384566858  |
| ENSG00000169397 | RNASE3         | ribonuclease, RNase A family, 3 [Source:HGNC Symbol;Acc:10046]                                              | -3.304094888 | 2.856619418  | 35.72558212 | 2.27E-09 | 1.04E-07 | 3.757204751  | 3.435068262  | -2.073364206 | 0.114810932  | 3.362039354  |
| ENSG00000239571 | IGKV2D-30      | immunoglobulin kappa variable 2D-30 [Source:HGNC Symbol;Acc:5801]                                           | -4.04842492  | 1.675881623  | 35.69456068 | 2.31E-09 | 1.06E-07 | 3.317173381  | 2.135558076  | -2.539967122 | -2.419096061 | -0.045536284 |
| ENSG00000188582 | PAQR9          | progesterin and adipoQ receptor family member IX [Source:HGNC Symbol;Acc:30131]                             | -9.732642548 | 1.258546919  | 35.67360309 | 2.33E-09 | 1.07E-07 | 2.207636582  | 2.618906922  | -7.002070102 | -7.002070102 | -0.257803757 |
| ENSG00000156802 | ATAD2          | ATPase family, AAA domain containing 2 [Source:HGNC Symbol;Acc:30123]                                       | -1.99948916  | 5.563681348  | 35.63220881 | 2.38E-09 | 1.09E-07 | 6.118249329  | 6.306723932  | 4.451010711  | 3.742650341  | 5.708916583  |
| ENSG00000117650 | NEK2           | NIMA-related kinase 2 [Source:HGNC Symbol;Acc:7745]                                                         | -2.969761734 | 2.267645208  | 35.53137328 | 2.51E-09 | 1.14E-07 | 3.32180121   | 3.171477064  | -0.82139248  | -0.7248947   | 1.84284836   |
| ENSG00000213005 | PTTG3P         | pituitary tumor-transforming 3, pseudogene [Source:HGNC Symbol;Acc:13422]                                   | -2.657688107 | 3.103984614  | 35.53467164 | 2.51E-09 | 1.14E-07 | 4.118070306  | 3.867899509  | 0.6928072    | 0.773941511  | 2.887241838  |
| ENSG00000071539 | TRIP13         | thyroid hormone receptor interactor 13 [Source:HGNC Symbol;Acc:12307]                                       | -2.782609137 | 2.71380908   | 35.50518974 | 2.54E-09 | 1.15E-07 | 3.715610023  | 3.498654468  | -0.329705368 | -0.053815412 | 2.656461736  |
| ENSG00000011465 | DCN            | decorin [Source:HGNC Symbol;Acc:2705]                                                                       | -4.961398641 | 1.523649826  | 35.35021205 | 2.75E-09 | 1.24E-07 | 2.900966723  | 2.591720352  | -4.621297774 | -4.730697034 | -1.083770229 |
| ENSG00000162367 | TALL1          | T-cell acute lymphocytic leukemia 1 [Source:HGNC Symbol;Acc:11556]                                          | -2.665267245 | 5.698249692  | 35.34140936 | 2.77E-09 | 1.25E-07 | 6.481448336  | 6.733304648  | 3.055465682  | 4.37586574   | 5.106126652  |
| ENSG00000184371 | CSF1           | colony stimulating factor 1 (macrophage) [Source:HGNC Symbol;Acc:2432]                                      | -2.279375405 | 4.651829404  | 35.30726529 | 2.82E-09 | 1.26E-07 | 5.804485679  | 5.390588949  | 3.531522919  | 2.60872607   | 3.305127547  |
| ENSG00000119333 | WDR34          | WD repeat domain 34 [Source:HGNC Symbol;Acc:28296]                                                          | -2.185489101 | 4.333272383  | 35.29917316 | 2.83E-09 | 1.27E-07 | 5.088171916  | 5.156692896  | 2.490973667  | 2.730566978  | 4.21213175   |
| ENSG00000261349 | RP3-465N24.5   |                                                                                                             | 6.999395481  | -0.28449975  | 35.14374707 | 3.06E-09 | 1.37E-07 | -4.650190627 | -7.002070102 | -4.621297774 | 0.894716898  | 0.923655414  |
| ENSG00000160949 | TONSL          | tonsoku-like, DNA repair protein [Source:HGNC Symbol;Acc:7801]                                              | -2.148133283 | 4.460180336  | 35.12820297 | 3.09E-09 | 1.38E-07 | 5.327874839  | 5.120294025  | 3.061151464  | 2.650493526  | 4.335675838  |
| ENSG00000231831 | MTHFD1P1       | methylene tetrahydrofolate dehydrogenase (NADP+ dependent) 1 pseudogene 1 [Source:HGNC Symbol;Acc:7433]     | -1.966510883 | 5.570355166  | 35.09416709 | 3.14E-09 | 1.40E-07 | 6.338621987  | 6.252964688  | 4.543275669  | 4.092461225  | 5.311515536  |
| ENSG00000023909 | GCLM           | glutamate-cysteine ligase, modifier subunit [Source:HGNC Symbol;Acc:4312]                                   | -2.004635991 | 4.987492186  | 35.00135872 | 3.29E-09 | 1.46E-07 | 5.597747815  | 5.922234132  | 3.823456948  | 3.18362115   | 4.699962837  |
| ENSG00000149150 | SLC43A1        | solute carrier family 43 (amino acid system L transporter), member 1 [Source:HGNC Symbol;Acc:9225]          | -2.047650037 | 5.059639947  | 34.96255566 | 3.36E-09 | 1.49E-07 | 5.873092938  | 5.888421125  | 3.98172333   | 3.266541267  | 4.534454294  |
| ENSG00000188486 | H2AFX          | H2A histone family, member X [Source:HGNC Symbol;Acc:4739]                                                  | -2.109782666 | 5.139731382  | 34.79306531 | 3.67E-09 | 1.62E-07 | 5.828261361  | 5.631555772  | 3.455848046  | 3.680166494  | 5.51760751   |
| ENSG00000103202 | NME4           | NME/NM23 nucleoside diphosphate kinase 4 [Source:HGNC Symbol;Acc:7852]                                      | -2.091382224 | 5.672188089  | 34.79015137 | 3.67E-09 | 1.62E-07 | 6.432008102  | 6.426964992  | 4.689939282  | 3.790136562  | 5.413758877  |
| ENSG00000268119 | CTD-256J22.5   |                                                                                                             | -3.322401754 | 2.061107019  | 34.78397815 | 3.68E-09 | 1.62E-07 | 2.811663962  | 3.368549783  | -1.886652327 | -1.70641174  | 1.374569317  |
| ENSG00000173626 | TRAPP3L        | trafficking protein particle complex 3-like [Source:HGNC Symbol;Acc:21090]                                  | 4.174920226  | 0.669016078  | 34.64615899 | 3.95E-09 | 1.73E-07 | -1.921450438 | -1.507080648 | 0.081791624  | 1.914722448  | 1.155968757  |
| ENSG00000214888 | Xyac-YM21GA2.7 |                                                                                                             | -9.442761224 | 0.927461254  | 34.61100815 | 4.03E-09 | 1.76E-07 | 2.103982592  | 2.235550428  | -7.002070102 | -7.002070102 | -2.832686105 |
| ENSG00000273112 | RP11-25K21.6   |                                                                                                             | 4.595948522  | -0.706761297 | 34.58289229 | 4.08E-09 | 1.78E-07 | -3.267125794 | -3.414167066 | -1.886652327 | 0.369457657  | 0.04992943   |
| ENSG00000259358 | RP11-456J20.1  |                                                                                                             | -3.759379824 | 1.463031344  | 34.5494267  | 4.16E-09 | 1.81E-07 | 2.552892059  | 2.320804564  | -3.766908349 | -2.205328685 | 1.218946104  |
| ENSG00000167747 | C19orf48       | chromosome 19 open reading frame 48 [Source:HGNC Symbol;Acc:29667]                                          | -2.029135591 | 5.095505411  | 34.53589889 | 4.18E-09 | 1.81E-07 | 6.020576715  | 5.736128797  | 3.990689068  | 3.67004846   | 4.573132831  |
| ENSG00000173848 | NET1           | neuroepithelial cell transforming 1 [Source:HGNC Symbol;Acc:14592]                                          | -2.334168968 | 4.859591206  | 34.52666284 | 4.20E-09 | 1.82E-07 | 5.707913644  | 5.799878799  | 3.765432491  | 2.311762486  | 4.193959434  |
| ENSG00000173262 | SLC2A14        | solute carrier family 2 (facilitated glucose transporter), member 14 [Source:HGNC Symbol;Acc:18301]         | -3.015484871 | 2.298548921  | 34.51380101 | 4.23E-09 | 1.83E-07 | 3.437191842  | 3.260485804  | -1.438615935 | -0.7248947   | 1.531661491  |
| ENSG00000068137 | PLEKH3         | pleckstrin homology domain containing, family H (with MyTH4 domain) member 3 [Source:HGNC Symbol;Acc:26105] | -2.778972843 | 2.609361613  | 34.48873338 | 4.29E-09 | 1.84E-07 | 3.428636013  | 3.718811978  | -0.453950945 | 0.301169826  | 2.098677261  |
| ENSG00000241859 | KALP           | Kallmann syndrome sequence pseudogene [Source:HGNC Symbol;Acc:6214]                                         | 7.096322213  | -0.206891639 | 34.37455466 | 4.55E-09 | 1.95E-07 | -7.002070102 | -4.777156855 | -7.002070102 | 1.224680533  | 0.735452007  |
| ENSG00000079257 | LXN            | latexin [Source:HGNC Symbol;Acc:13347]                                                                      | -2.399180237 | 3.648845062  | 34.36950207 | 4.56E-09 | 1.95E-07 | 4.730925147  | 4.476025242  | 2.096120255  | 1.314027603  | 2.772967998  |
| ENSG00000116774 | OLFML3         | olfactomedin-like 3 [Source:HGNC Symbol;Acc:24956]                                                          | -3.661190359 | 1.431130867  | 34.31977633 | 4.68E-09 | 2.00E-07 | 2.791786669  | 2.409108576  | -3.23942493  | -2.0191864   | -0.80787826  |
| ENSG00000188985 | DHFRP1         | dihydrofolate reductase pseudogene 1 [Source:HGNC Symbol;Acc:2862]                                          | -2.085276549 | 4.312136203  | 34.28602757 | 4.76E-09 | 2.03E-07 | 5.117746192  | 5.089041497  | 3.009154251  | 2.543716201  | 4.033874407  |
| ENSG00000211599 | IGKV5-2        | immunoglobulin kappa variable 5-2 [Source:HGNC Symbol;Acc:5835]                                             | -3.898360973 | 1.916993619  | 34.21208066 | 4.94E-09 | 2.10E-07 | 2.961531071  | 2.126114598  | -1.721358966 | -4.730697034 | 2.618035833  |
| ENSG00000239819 | IGKV1D-8       | immunoglobulin kappa variable 1D-8 [Source:HGNC Symbol;Acc:5759]                                            | -3.717297103 | 1.768452289  | 34.1978428  | 4.98E-09 | 2.11E-07 | 3.260449604  | 2.304152017  | -1.315629595 | -2.97427061  | 0.763888603  |

|                 |                |                                                                                                           |              |              |             |          |          |              |              |              |              |              |
|-----------------|----------------|-----------------------------------------------------------------------------------------------------------|--------------|--------------|-------------|----------|----------|--------------|--------------|--------------|--------------|--------------|
| ENSG00000211934 | IGHV1-2        | immunoglobulin heavy variable 1-2 [Source:HGNC Symbol;Acc:5550]                                           | -4.392154364 | 7.0245231    | 34.13705405 | 5.14E-09 | 2.17E-07 | 8.519245345  | 7.694642444  | 4.373157081  | 0.917704421  | 5.754799245  |
| ENSG00000168542 | COL3A1         | collagen, type III, alpha 1 [Source:HGNC Symbol;Acc:2201]                                                 | -9.613628133 | 1.064528481  | 34.08561839 | 5.27E-09 | 2.23E-07 | 2.560743753  | 2.01793956   | -7.002070102 | -7.002070102 | -2.526883755 |
| ENSG00000162062 | C16orf59       | chromosome 16 open reading frame 59 [Source:HGNC Symbol;Acc:25849]                                        | -3.082694899 | 1.981467207  | 33.99718122 | 5.52E-09 | 2.32E-07 | 2.937609558  | 2.848713379  | -1.315629595 | -1.133744865 | 1.895203721  |
| ENSG00000223519 | KIF28P         | kinesin family member 28, pseudogene [Source:HGNC Symbol;Acc:49205]                                       | 3.759092057  | 0.313549263  | 33.94007314 | 5.68E-09 | 2.39E-07 | -1.47369337  | -1.507080648 | 0.437007322  | 1.79568083   | -1.42520211  |
| ENSG00000134668 | SPOCD1         | SPOC domain containing 1 [Source:HGNC Symbol;Acc:26338]                                                   | 4.206467013  | 1.995659798  | 33.93309346 | 5.70E-09 | 2.39E-07 | -1.47369337  | 0.056395802  | 1.432844522  | 3.37017149   | 2.381602043  |
| ENSG00000223723 | BX842568.2     |                                                                                                           | -1.87267929  | 5.513899674  | 33.8452959  | 5.97E-09 | 2.49E-07 | 6.21719769   | 6.322830407  | 4.345467014  | 4.102527846  | 5.177887994  |
| ENSG00000211632 | IGKV3D-11      | immunoglobulin kappa variable 3D-11 [Source:HGNC Symbol;Acc:5823]                                         | -3.324832306 | 2.281230092  | 33.79294873 | 6.13E-09 | 2.56E-07 | 3.621150429  | 2.605377675  | -0.520331194 | -1.572251189 | 2.206202022  |
| ENSG00000211633 | IGKV1D-42      | immunoglobulin kappa variable 1D-42 (non-functional) [Source:HGNC Symbol;Acc:5757]                        | -4.491681418 | 1.434282551  | 33.77453363 | 6.19E-09 | 2.57E-07 | 2.785099575  | 1.986973075  | -2.845623393 | -7.002070102 | 1.155968757  |
| ENSG00000154330 | PGM5           | phosphoglucomutase 5 [Source:HGNC Symbol;Acc:8908]                                                        | 4.659045712  | -0.030601481 | 33.54070403 | 6.98E-09 | 2.90E-07 | -3.267125794 | -2.726009782 | -1.097244829 | 1.261086007  | 0.584199832  |
| ENSG00000260197 | RP11-424G14.1  |                                                                                                           | 8.463532297  | -0.316095338 | 33.42453446 | 7.41E-09 | 3.07E-07 | -7.002070102 | -7.002070102 | -7.002070102 | 0.798919003  | 0.997359302  |
| ENSG00000165124 | SVEP1          | sushi, von Willebrand factor type A, EGF and pentraxin domain containing 1 [Source:HGNC Symbol;Acc:15985] | -9.255418109 | 0.82085954   | 33.35373247 | 7.68E-09 | 3.17E-07 | 2.332130562  | 1.761572815  | -7.002070102 | -7.002070102 | -3.754655114 |
| ENSG00000112212 | TSP02          | translocator protein 2 [Source:HGNC Symbol;Acc:21256]                                                     | -5.717525953 | 1.405157882  | 33.2998756  | 7.90E-09 | 3.25E-07 | 1.832851647  | 2.877139309  | -4.621297774 | -7.002070102 | 0.948644093  |
| ENSG00000092853 | CLSPN          | claspin [Source:HGNC Symbol;Acc:19715]                                                                    | -2.697534922 | 3.244609183  | 33.29141347 | 7.93E-09 | 3.26E-07 | 3.909466259  | 4.159324949  | -0.271377577 | 0.940331404  | 3.516256447  |
| ENSG00000143479 | DYRK3          | dual-specificity tyrosine-(Y)-phosphorylation regulated kinase 3 [Source:HGNC Symbol;Acc:3094]            | -2.8925842   | 2.270199914  | 33.14101739 | 8.57E-09 | 3.52E-07 | 3.165810641  | 3.281905652  | -0.907612816 | -1.042179808 | 2.030092686  |
| ENSG00000227165 | WDR11-AS1      | WDR11 antisense RNA 1 [Source:HGNC Symbol;Acc:27437]                                                      | 4.274608079  | 1.586418494  | 33.10147989 | 8.75E-09 | 3.58E-07 | -0.856736938 | -0.855949929 | 0.983710868  | 3.32789308   | 0.646616095  |
| ENSG00000120158 | RCL1           | RNA terminal phosphate cyclase-like 1 [Source:HGNC Symbol;Acc:17687]                                      | -2.164354298 | 4.630963537  | 33.06992248 | 8.89E-09 | 3.63E-07 | 5.610096937  | 5.433303763  | 3.622778389  | 2.664151552  | 3.68560772   |
| ENSG00000100321 | SYNGR1         | synaptogyrin 1 [Source:HGNC Symbol;Acc:11498]                                                             | -1.931310678 | 5.293255651  | 32.9668333  | 9.37E-09 | 3.82E-07 | 6.040366658  | 6.034387989  | 3.901593689  | 3.951990081  | 5.086559371  |
| ENSG00000137757 | CASP5          | caspace 5, apoptosis-related cysteine peptidase [Source:HGNC Symbol;Acc:1506]                             | 3.364717153  | 1.464052938  | 32.92738709 | 9.57E-09 | 3.89E-07 | -0.698419327 | -0.204475541 | 1.342349735  | 2.175352965  | 2.32547185   |
| ENSG00000116748 | AMPD1          | adenosine monophosphate deaminase 1 [Source:HGNC Symbol;Acc:468]                                          | -4.607864376 | 1.765429326  | 32.90237121 | 9.69E-09 | 3.93E-07 | 3.33559629   | 2.439924693  | -3.766908349 | -4.730697034 | 0.095393329  |
| ENSG00000136842 | TMOD1          | tropomodulin 1 [Source:HGNC Symbol;Acc:11871]                                                             | -2.387819897 | 3.63162505   | 32.85855355 | 9.91E-09 | 4.01E-07 | 4.380109475  | 4.724655254  | 2.213098418  | 1.187332556  | 2.900109607  |
| ENSG00000153044 | CENPH          | centromere protein H [Source:HGNC Symbol;Acc:17268]                                                       | -2.29915903  | 3.793963214  | 32.8293588  | 1.01E-08 | 4.06E-07 | 4.666893152  | 4.607387401  | 2.358715867  | 1.39816257   | 3.524590078  |
| ENSG00000237972 | TUBG1P         | tubulin, gamma 1 pseudogene [Source:HGNC Symbol;Acc:12418]                                                | -2.177665836 | 4.055811469  | 32.72355576 | 1.06E-08 | 4.27E-07 | 4.805513338  | 5.085391481  | 2.723873993  | 2.165783527  | 3.295420086  |
| ENSG00000233614 | DDX11L10       | DEAD/H (Asp-Glu-Ala-Asp/His) box helicase 11 like 10 [Source:HGNC Symbol;Acc:14125]                       | 4.88956103   | 2.372965771  | 32.72789165 | 1.06E-08 | 4.27E-07 | -1.921450438 | -0.204475541 | 1.467510679  | 4.168699992  | 1.882291923  |
| ENSG00000196584 | XRCC2          | X-ray repair complementing defective repair in Chinese hamster cells 2 [Source:HGNC Symbol;Acc:12829]     | -2.473940172 | 3.070812261  | 32.62852955 | 1.12E-08 | 4.47E-07 | 4.024649331  | 3.881994713  | 1.163613388  | 0.434658742  | 2.8278729    |
| ENSG00000131002 | TXLNG2P        | taxilin gamma 2, pseudogene [Source:HGNC Symbol;Acc:18473]                                                | 7.972080975  | 4.931235413  | 32.55406806 | 1.16E-08 | 4.64E-07 | -2.108017771 | -1.91149394  | -1.886652327 | 6.233239397  | 6.253639536  |
| ENSG00000211670 | IGLV3-9        | immunoglobulin lambda variable 3-9 (gene/pseudogene) [Source:HGNC Symbol;Acc:5918]                        | -3.014476952 | 3.211596472  | 32.46153693 | 1.22E-08 | 4.85E-07 | 4.18817535   | 2.980321272  | 0.28980717   | -0.350682213 | 4.167595364  |
| ENSG00000067646 | ZFY            | zinc finger protein, Y-linked [Source:HGNC Symbol;Acc:12870]                                              | 6.174245335  | 2.857026955  | 32.33243043 | 1.30E-08 | 5.17E-07 | -2.574166106 | -2.475439898 | -2.539967122 | 3.823992547  | 4.414022873  |
| ENSG00000250334 | LINC00989      | long intergenic non-protein coding RNA 989 [Source:HGNC Symbol;Acc:48918]                                 | 3.518116849  | 2.74429424   | 32.28347053 | 1.33E-08 | 5.29E-07 | 0.133035942  | 0.664086661  | 2.02807612   | 3.805624207  | 3.644141113  |
| ENSG00000111339 | ART4           | ADP-ribosyltransferase 4 (Dombrock blood group) [Source:HGNC Symbol;Acc:726]                              | -5.47652359  | 1.589726749  | 32.16759111 | 1.41E-08 | 5.60E-07 | 2.197599956  | 2.865836059  | -4.621297774 | -7.002070102 | 1.481174441  |
| ENSG00000272327 | RP11-1002K11.1 |                                                                                                           | 3.543306934  | 1.731805867  | 32.13258238 | 1.44E-08 | 5.69E-07 | -2.879434292 | -1.507080648 | 0.210162819  | 0.497040107  | 3.743871718  |
| ENSG00000181631 | P2RY13         | purinergic receptor P2Y, G-protein coupled, 13 [Source:HGNC Symbol;Acc:4537]                              | 1.864106089  | 5.723203092  | 32.06651865 | 1.49E-08 | 5.88E-07 | 4.328155027  | 4.428798332  | 5.947049467  | 6.22116301   | 6.425913578  |
| ENSG00000259179 | UBE2CP4        | ubiquitin-conjugating enzyme E2C pseudogene 4 [Source:HGNC Symbol;Acc:43553]                              | -3.25513104  | 1.721703763  | 32.04235774 | 1.51E-08 | 5.94E-07 | 2.857006212  | 2.564011614  | -2.287883461 | -1.336401299 | 1.279288931  |
| ENSG0000012048  | BRCA1          | breast cancer 1, early onset [Source:HGNC Symbol;Acc:1100]                                                | -2.086418567 | 4.461072301  | 31.6945379  | 1.80E-08 | 7.09E-07 | 5.1230588    | 5.202341784  | 2.650340322  | 2.947141733  | 4.595060667  |

|                 |              |                                                                                                       |              |             |             |          |          |              |              |              |              |              |
|-----------------|--------------|-------------------------------------------------------------------------------------------------------|--------------|-------------|-------------|----------|----------|--------------|--------------|--------------|--------------|--------------|
| ENSG00000106537 | TSPAN13      | tetraspanin 13 [Source:HGNC Symbol;Acc:21643]                                                         | -2.177821976 | 3.993036913 | 31.56965561 | 1.92E-08 | 7.54E-07 | 4.670526032  | 4.419164558  | 2.171650019  | 1.596392694  | 4.641776785  |
| ENSG00000146592 | CREB5        | cAMP responsive element binding protein 5 [Source:HGNC Symbol;Acc:16844]                              | 2.114604018  | 5.716981857 | 31.49275139 | 2.00E-08 | 7.83E-07 | 3.621150429  | 4.321184566  | 5.625934453  | 6.485326789  | 6.515395492  |
| ENSG00000105507 | CABP5        | calcium binding protein 5 [Source:HGNC Symbol;Acc:13714]                                              | 3.603937037  | 1.520114341 | 31.48095359 | 2.01E-08 | 7.86E-07 | -0.555769858 | -0.408932621 | 1.184602189  | 2.730566978  | 1.895203721  |
| ENSG00000233013 | FAM157B      | family with sequence similarity 157, member B [Source:HGNC Symbol;Acc:34080]                          | 3.589048182  | 0.262973037 | 31.47489423 | 2.02E-08 | 7.86E-07 | -1.756270337 | -1.394066322 | 0.081791624  | 1.261086007  | 0.676839958  |
| ENSG00000164292 | RHOBTB3      | Rho-related BTB domain containing 3 [Source:HGNC Symbol;Acc:18757]                                    | -2.314414211 | 4.220160163 | 31.46921536 | 2.03E-08 | 7.87E-07 | 5.180241648  | 5.042111296  | 2.139763053  | 2.818693563  | 3.609304371  |
| ENSG00000165702 | GFI1B        | growth factor independent 1B transcription repressor [Source:HGNC Symbol;Acc:4238]                    | -2.540341553 | 5.49982241  | 31.43322171 | 2.06E-08 | 8.00E-07 | 6.359590578  | 6.492739786  | 2.899175647  | 4.296970828  | 4.734498925  |
| ENSG00000186603 | HPDL         | 4-hydroxyphenylpyruvate dioxygenase-like [Source:HGNC Symbol;Acc:28242]                               | -3.038808596 | 1.973982483 | 31.41866786 | 2.08E-08 | 8.04E-07 | 3.236140248  | 2.73527877   | -0.329705368 | -1.572251189 | 1.090116303  |
| ENSG00000172752 | COL6A5       | collagen, type VI, alpha 5 [Source:HGNC Symbol;Acc:26674]                                             | -5.375117847 | 1.153884004 | 31.39336223 | 2.11E-08 | 8.13E-07 | 2.304339895  | 2.295753104  | -7.002070102 | -4.730697034 | -0.147769603 |
| ENSG00000099725 | PRKY         | protein kinase, Y-linked, pseudogene [Source:HGNC Symbol;Acc:9444]                                    | 7.113868035  | 4.104635847 | 31.22041502 | 2.30E-08 | 8.87E-07 | -1.756270337 | -2.475439898 | -2.073364206 | 5.682866335  | 5.072418452  |
| ENSG00000121621 | KIF18A       | kinesin family member 18A [Source:HGNC Symbol;Acc:29441]                                              | -2.397402345 | 2.982060569 | 31.19351308 | 2.34E-08 | 8.97E-07 | 3.77756088   | 3.845056765  | 1.030832979  | 0.798919003  | 2.874258264  |
| ENSG00000071794 | HLTF         | helicase-like transcription factor [Source:HGNC Symbol;Acc:11099]                                     | -1.980036406 | 5.247334666 | 31.0643614  | 2.50E-08 | 9.57E-07 | 5.928000649  | 6.053195615  | 4.307700297  | 3.284338193  | 5.034989944  |
| ENSG00000146918 | NCAPG2       | non-SMC condensin II complex, subunit G2 [Source:HGNC Symbol;Acc:21904]                               | -1.855493383 | 4.971278828 | 31.04392435 | 2.52E-08 | 9.65E-07 | 5.523357725  | 5.759221375  | 3.71943079   | 3.462952422  | 5.008497083  |
| ENSG00000211598 | IGKV4-1      | immunoglobulin kappa variable 4-1 [Source:HGNC Symbol;Acc:5834]                                       | -3.858604642 | 8.382615734 | 30.92785642 | 2.68E-08 | 1.02E-06 | 9.915681259  | 8.83870785   | 3.840088097  | 5.97902694   | 7.386669125  |
| ENSG00000196139 | AKR1C3       | aldo-keto reductase family 1, member C3 [Source:HGNC Symbol;Acc:386]                                  | -2.374405617 | 4.5966422   | 30.86212621 | 2.77E-08 | 1.05E-06 | 5.791198376  | 5.1578519    | 2.596541649  | 3.120624317  | 3.892932647  |
| ENSG00000113924 | HGD          | homogentisate 1,2-dioxygenase [Source:HGNC Symbol;Acc:4892]                                           | 3.196542535  | 1.610531743 | 30.86683134 | 2.76E-08 | 1.05E-06 | 0.000762307  | 0.277241192  | 1.829176068  | 2.830854872  | 1.06748014   |
| ENSG00000183878 | UTY          | ubiquitously transcribed tetratricopeptide repeat containing, Y-linked [Source:HGNC Symbol;Acc:12638] | 7.48448167   | 4.065219902 | 30.86310185 | 2.77E-08 | 1.05E-06 | -2.879434292 | -1.763731145 | -2.539967122 | 5.571315722  | 5.140421471  |
| ENSG00000242766 | IGKV1D-17    | immunoglobulin kappa variable 1D-17 [Source:HGNC Symbol;Acc:5749]                                     | -4.049596981 | 1.353554849 | 30.81528245 | 2.84E-08 | 1.07E-06 | 2.818229329  | 1.785765038  | -3.766908349 | -2.97427061  | 0.84598249   |
| ENSG00000157734 | SNX22        | sorting nexin 22 [Source:HGNC Symbol;Acc:16315]                                                       | -2.354050617 | 4.715718059 | 30.78785175 | 2.88E-08 | 1.09E-06 | 5.544299326  | 5.290579393  | 3.510897178  | 2.13668837   | 4.882862945  |
| ENSG00000111843 | TMEM14C      | transmembrane protein 14C [Source:HGNC Symbol;Acc:20952]                                              | -1.844192467 | 5.418385976 | 30.77476966 | 2.90E-08 | 1.09E-06 | 6.24730942   | 6.136686079  | 4.357069198  | 4.390318387  | 4.6851703    |
| ENSG00000167701 | GPT          | glutamic-pyruvate transaminase (alanine aminotransferase) [Source:HGNC Symbol;Acc:4552]               | -3.300662759 | 1.13114873  | 30.68391411 | 3.04E-08 | 1.14E-06 | 2.341276415  | 2.097407515  | -2.287883461 | -2.0191864   | -0.257803757 |
| ENSG00000136982 | DSCC1        | DNA replication and sister chromatid cohesion 1 [Source:HGNC Symbol;Acc:24453]                        | -2.520989212 | 2.692687342 | 30.65726199 | 3.08E-08 | 1.15E-06 | 3.628640226  | 3.590786525  | 0.125863448  | 0.335717742  | 2.390748373  |
| ENSG00000076248 | UNG          | uracil-DNA glycosylase [Source:HGNC Symbol;Acc:12572]                                                 | -1.9198069   | 4.652781641 | 30.45560634 | 3.42E-08 | 1.28E-06 | 5.394191815  | 5.249855047  | 3.49837869   | 2.918936894  | 4.729100523  |
| ENSG00000214688 | C10orf105    | chromosome 10 open reading frame 105 [Source:HGNC Symbol;Acc:20304]                                   | 3.258555061  | 1.919877748 | 30.45588673 | 3.42E-08 | 1.28E-06 | 0.000762307  | 0.527293245  | 1.829176068  | 3.140302572  | 1.933259916  |
| ENSG00000185198 | PRSS57       | protease, serine, 57 [Source:HGNC Symbol;Acc:31397]                                                   | -2.898620117 | 4.222433372 | 30.44028799 | 3.44E-08 | 1.28E-06 | 5.070406928  | 4.828743922  | 0.210162819  | 2.36290873   | 4.628306871  |
| ENSG00000114374 | USP9Y        | ubiquitin specific peptidase 9, Y-linked [Source:HGNC Symbol;Acc:12633]                               | 7.53284949   | 4.169554711 | 30.41259178 | 3.49E-08 | 1.30E-06 | -1.921450438 | -3.940353384 | -3.233942493 | 5.49503679   | 5.465535705  |
| ENSG00000169313 | P2RY12       | purinergic receptor P2Y, G-protein coupled, 12 [Source:HGNC Symbol;Acc:18124]                         | 3.148419191  | 2.165288887 | 30.37808694 | 3.56E-08 | 1.32E-06 | 0.174562846  | 0.859104642  | 2.321298905  | 3.361814346  | 1.97033799   |
| ENSG00000156265 | MAP3K7CL     | MAP3K7 C-terminal like [Source:HGNC Symbol;Acc:16457]                                                 | 1.946038287  | 5.688356144 | 30.36082225 | 3.59E-08 | 1.33E-06 | 4.269476339  | 4.681789027  | 5.975178438  | 6.497298392  | 5.891559125  |
| ENSG0000012817  | KDM5D        | lysine (K)-specific demethylase 5D [Source:HGNC Symbol;Acc:11115]                                     | 7.920254969  | 5.692849322 | 30.3279666  | 3.65E-08 | 1.35E-06 | -1.237502295 | -1.100062965 | -1.721358966 | 6.979620611  | 7.033273063  |
| ENSG00000271736 | RP11-85G21.3 |                                                                                                       | -3.687051604 | 1.208134812 | 30.09585814 | 4.11E-08 | 1.52E-06 | 1.819824215  | 2.57098885   | -2.539967122 | -3.360122781 | 0.551948963  |
| ENSG00000231331 | AC103563.2   |                                                                                                       | -4.382163068 | 1.27138033  | 30.05016345 | 4.21E-08 | 1.55E-06 | 2.850615345  | 1.761572815  | -2.845623393 | -7.002070102 | 0.04992943   |
| ENSG00000134755 | DSC2         | desmocollin 2 [Source:HGNC Symbol;Acc:3036]                                                           | 3.761447406  | 3.63404551  | 29.9661423  | 4.40E-08 | 1.61E-06 | -0.365194284 | 1.128690501  | 2.430758609  | 4.199509687  | 5.134988789  |
| ENSG00000135446 | CDK4         | cyclin-dependent kinase 4 [Source:HGNC Symbol;Acc:1773]                                               | -1.829495829 | 5.756033295 | 29.95404194 | 4.42E-08 | 1.62E-06 | 6.55207786   | 6.348943042  | 4.854504969  | 4.45852833   | 5.448117365  |
| ENSG00000211895 | IGHA1        | immunoglobulin heavy constant alpha 1 [Source:HGNC Symbol;Acc:5478]                                   | -4.323794933 | 10.91200984 | 29.92010596 | 4.50E-08 | 1.65E-06 | 12.26482637  | 11.57775588  | 7.695510513  | 5.291193806  | 10.46085151  |

|                 |              |                                                                                                    |              |              |             |          |          |              |              |              |              |              |
|-----------------|--------------|----------------------------------------------------------------------------------------------------|--------------|--------------|-------------|----------|----------|--------------|--------------|--------------|--------------|--------------|
| ENSG00000081803 | CADPS2       | Ca <sup>++</sup> -dependent secretion activator 2 [Source:HGNC Symbol;Acc:16018]                   | -9.22237299  | 0.683647474  | 29.8672518  | 4.63E-08 | 1.69E-06 | 2.197599956  | 1.339492543  | -7.002070102 | -7.002070102 | -0.72651138  |
| ENSG00000221988 | PPT2         | palmitoyl-protein thioesterase 2 [Source:HGNC Symbol;Acc:9326]                                     | -2.290022859 | 3.641673391  | 29.86197572 | 4.64E-08 | 1.69E-06 | 4.693919354  | 4.453549171  | 2.386155201  | 1.381723529  | 2.693890668  |
| ENSG00000101825 | MXRA5        | matrix-remodelling associated 5 [Source:HGNC Symbol;Acc:7539]                                      | -9.085282266 | 0.679309807  | 29.8292397  | 4.72E-08 | 1.71E-06 | 2.177314774  | 1.607225949  | -7.002070102 | -7.002070102 | -3.221241555 |
| ENSG00000151023 | ENKUR        | enkurin, TRPC channel interacting protein [Source:HGNC Symbol;Acc:28388]                           | 3.392352672  | 2.295024625  | 29.81860229 | 4.74E-08 | 1.72E-06 | 0.566455146  | 0.498306264  | 2.096120255  | 3.676801694  | 2.098677261  |
| ENSG00000103569 | AQP9         | aquaporin 9 [Source:HGNC Symbol;Acc:643]                                                           | 2.899737583  | 6.291271799  | 29.75774182 | 4.90E-08 | 1.77E-06 | 3.807566461  | 4.528939153  | 5.72596636   | 7.508400022  | 6.897492756  |
| ENSG00000139329 | LUM          | lumican [Source:HGNC Symbol;Acc:6724]                                                              | -9.205919345 | 0.63677357   | 29.53078301 | 5.50E-08 | 1.99E-06 | 2.114689606  | 1.508923295  | -7.002070102 | -7.002070102 | -1.87334355  |
| ENSG00000249992 | TMEM158      | transmembrane protein 158 (gene/pseudogene) [Source:HGNC Symbol;Acc:30293]                         | 3.233995323  | 0.255514397  | 29.49631035 | 5.60E-08 | 2.02E-06 | -1.921450438 | -1.394066322 | 0.602113338  | 0.527247606  | 1.090116303  |
| ENSG00000134571 | MYBPC3       | myosin binding protein C, cardiac [Source:HGNC Symbol;Acc:7551]                                    | 3.303305891  | 2.677578388  | 29.39990265 | 5.89E-08 | 2.12E-06 | 0.365960855  | 0.881727766  | 1.980862385  | 3.793247421  | 3.430160334  |
| ENSG00000185480 | PARBP        | PARP1 binding protein [Source:HGNC Symbol;Acc:26074]                                               | -2.289420015 | 3.433810024  | 29.30344946 | 6.19E-08 | 2.22E-06 | 4.44729995   | 4.102674026  | 1.517996407  | 1.462107232  | 3.189342067  |
| ENSG00000225523 | IGKV6D-21    | immunoglobulin kappa variable 6D-21 (non-functional) [Source:HGNC Symbol;Acc:5837]                 | -4.165727936 | 1.11136374   | 29.13740478 | 6.74E-08 | 2.42E-06 | 2.429680882  | 1.537699846  | -3.233942493 | -4.730697034 | 1.06748014   |
| ENSG00000137135 | ARHGEF39     | Rho guanine nucleotide exchange factor (GEF) 39 [Source:HGNC Symbol;Acc:25909]                     | -2.564840864 | 2.370300668  | 29.05445291 | 7.04E-08 | 2.52E-06 | 3.201403963  | 3.212211862  | -0.390491059 | -0.296766077 | 2.461903625  |
| ENSG00000115641 | FHL2         | four and a half LIM domains 2 [Source:HGNC Symbol;Acc:3703]                                        | -2.544137403 | 3.034601417  | 29.02690616 | 7.14E-08 | 2.55E-06 | 4.096626906  | 3.990057211  | -0.010608983 | 1.224680533  | 2.109797605  |
| ENSG00000238201 | AC114752.3   |                                                                                                    | 4.260318813  | -0.2249337   | 28.9568768  | 7.40E-08 | 2.64E-06 | -3.79890385  | -2.726009782 | -1.57307192  | 0.527247606  | 1.021113618  |
| ENSG00000150048 | CLEC1A       | C-type lectin domain family 1, member A [Source:HGNC Symbol;Acc:24355]                             | 3.525664107  | 0.398012129  | 28.9453326  | 7.44E-08 | 2.65E-06 | -1.921450438 | -0.647226338 | 0.437007322  | 1.508271876  | 0.264147325  |
| ENSG00000135776 | ABCB10       | ATP-binding cassette, sub-family B (MDR/TAP), member 10 [Source:HGNC Symbol;Acc:41]                | -1.764299372 | 5.491288697  | 28.88532835 | 7.68E-08 | 2.72E-06 | 5.976499327  | 6.412957065  | 4.336117616  | 4.277109662  | 5.202768638  |
| ENSG00000181634 | TNFSF15      | tumor necrosis factor (ligand) superfamily, member 15 [Source:HGNC Symbol;Acc:11931]               | 3.707769928  | 0.053430127  | 28.85757292 | 7.79E-08 | 2.76E-06 | -2.322346157 | -1.763731145 | -0.907612816 | 0.722650538  | 1.177268129  |
| ENSG00000236304 | AP001189.4   |                                                                                                    | 3.609184464  | 3.509677127  | 28.85363812 | 7.81E-08 | 2.76E-06 | 0.46968809   | 1.32305554   | 2.694908712  | 4.996853041  | 3.843827185  |
| ENSG00000163735 | CXCL5        | chemokine (C-X-C motif) ligand 5 [Source:HGNC Symbol;Acc:10642]                                    | 2.542858975  | 3.622051044  | 28.8496208  | 7.82E-08 | 2.76E-06 | 1.431768352  | 2.181869923  | 3.591687772  | 4.390318387  | 4.395967379  |
| ENSG00000137310 | TCF19        | transcription factor 19 [Source:HGNC Symbol;Acc:11629]                                             | -1.920905207 | 4.879307837  | 28.79042586 | 8.06E-08 | 2.84E-06 | 5.46284102   | 5.651440791  | 3.904759317  | 3.105687454  | 4.853393618  |
| ENSG00000123243 | ITIH5        | inter-alpha-trypsin inhibitor heavy chain family, member 5 [Source:HGNC Symbol;Acc:21449]          | -8.443245244 | -0.092164154 | 28.77371879 | 8.13E-08 | 2.86E-06 | 1.361587606  | 0.812765477  | -7.002070102 | -7.002070102 | -4.610216385 |
| ENSG00000250771 | RP11-153M7.3 |                                                                                                    | 5.773897674  | 1.952047645  | 28.76524879 | 8.17E-08 | 2.86E-06 | -1.608074432 | -3.414167066 | -1.721358966 | 3.736199089  | 2.31590077   |
| ENSG00000117394 | SLC2A1       | solute carrier family 2 (facilitated glucose transporter), member 1 [Source:HGNC Symbol;Acc:11005] | -2.048025858 | 6.401625688  | 28.75146506 | 8.23E-08 | 2.88E-06 | 6.92942515   | 7.417495033  | 5.588036618  | 4.519907545  | 5.870464764  |
| ENSG00000092200 | RPGRIP1      | retinitis pigmentosa GTPase regulator interacting protein 1 [Source:HGNC Symbol;Acc:13436]         | 3.344344782  | 1.934459769  | 28.71772143 | 8.37E-08 | 2.92E-06 | -0.555769858 | 0.610915408  | 1.829176068  | 3.145180481  | 2.076176073  |
| ENSG00000106714 | CNTNAP3      | contactin associated protein-like 3 [Source:HGNC Symbol;Acc:13834]                                 | 4.397702077  | 0.766332978  | 28.6423663  | 8.71E-08 | 3.03E-06 | -2.322346157 | -3.414167066 | -3.233942493 | 1.381723529  | 2.399837082  |
| ENSG00000198692 | EIF1AY       | eukaryotic translation initiation factor 1A, Y-linked [Source:HGNC Symbol;Acc:3252]                | 5.678500441  | 2.022970549  | 28.61710167 | 8.82E-08 | 3.07E-06 | -2.322346157 | -3.414167066 | -3.233942493 | 2.991153022  | 3.553384437  |
| ENSG00000161800 | RACGAP1      | Rac GTPase activating protein 1 [Source:HGNC Symbol;Acc:9804]                                      | -2.186778875 | 3.759002896  | 28.59696516 | 8.91E-08 | 3.09E-06 | 4.709895349  | 4.370006427  | 1.980862385  | 1.90325069   | 3.68560772   |
| ENSG00000204872 | AC092653.5   |                                                                                                    | 3.87233307   | 0.575343756  | 28.58516111 | 8.97E-08 | 3.10E-06 | -1.608074432 | -1.014020025 | 0.328039018  | 2.035234912  | -0.045536284 |
| ENSG00000088882 | CPXM1        | carboxypeptidase X (M14 family), member 1 [Source:HGNC Symbol;Acc:15771]                           | -2.756061792 | 3.164023204  | 28.58102284 | 8.99E-08 | 3.11E-06 | 4.160023991  | 3.845056765  | -0.66302287  | 1.314027603  | 3.194574245  |
| ENSG00000198176 | TFDP1        | transcription factor Dp-1 [Source:HGNC Symbol;Acc:11749]                                           | -1.745000451 | 6.177792936  | 28.54952715 | 9.13E-08 | 3.15E-06 | 6.744892565  | 6.953514507  | 5.191663542  | 5.022263589  | 5.940650325  |
| ENSG00000234819 | RP11-336N8.4 |                                                                                                    | -2.668697459 | 2.333097675  | 28.53459908 | 9.20E-08 | 3.17E-06 | 3.583106845  | 2.819716087  | -0.215316613 | 0.074465887  | 1.982488568  |
| ENSG00000108244 | KRT23        | keratin 23 (histone deacetylase inducible) [Source:HGNC Symbol;Acc:6438]                           | 3.903213589  | 0.637213661  | 28.41007129 | 9.82E-08 | 3.37E-06 | -1.608074432 | -1.394066322 | -0.215316613 | 1.948600359  | 1.044483142  |
| ENSG00000224259 | LINC01133    | long intergenic non-protein coding RNA 1133 [Source:HGNC Symbol;Acc:49447]                         | -5.260919017 | 1.140489522  | 28.34817646 | 1.01E-07 | 3.47E-06 | 2.521050858  | 1.997369264  | -4.621297774 | -7.002070102 | -0.095747566 |
| ENSG00000111602 | TIMELESS     | timeless circadian clock [Source:HGNC Symbol;Acc:11813]                                            | -1.749997498 | 5.491577766  | 28.3025734  | 1.04E-07 | 3.55E-06 | 6.136752081  | 6.062508275  | 4.300507637  | 4.146978108  | 5.645377617  |
| ENSG00000216775 | RP1-152L7.5  |                                                                                                    | -2.888665085 | 1.727031865  | 28.28214972 | 1.05E-07 | 3.58E-06 | 2.673662624  | 2.477541651  | -1.57307192  | -1.042179808 | 1.802296017  |
| ENSG00000183625 | CCR3         | chemokine (C-C motif) receptor 3 [Source:HGNC Symbol;Acc:1604]                                     | 2.9998543    | 0.103348136  | 28.18115836 | 1.10E-07 | 3.77E-06 | -1.237502295 | -1.191564836 | 0.602113338  | 0.556835562  | 0.341656497  |



|                 |               |                                                                                                |              |              |             |          |          |              |              |              |              |              |
|-----------------|---------------|------------------------------------------------------------------------------------------------|--------------|--------------|-------------|----------|----------|--------------|--------------|--------------|--------------|--------------|
| ENSG00000197256 | KANK2         | KN motif and ankyrin repeat domains 2 [Source:HGNC Symbol;Acc:29300]                           | -2.347987641 | 3.921557626  | 28.17210584 | 1.11E-07 | 3.78E-06 | 4.618813883  | 4.890006675  | 1.304500245  | 2.329013491  | 3.779126901  |
| ENSG00000225356 | RP11-43303.1  |                                                                                                | -3.924028996 | 0.601238702  | 28.05076094 | 1.18E-07 | 4.01E-06 | 1.908638473  | 1.523383318  | -3.766908349 | -3.888428289 | -0.9858258   |
| ENSG00000156140 | ADAMTS3       | ADAM metalloproteinase with thrombospondin type 1 motif, 3 [Source:HGNC Symbol;Acc:219]        | -3.632548263 | 1.330156829  | 28.02665487 | 1.20E-07 | 4.06E-06 | 2.496700121  | 2.295753104  | -2.845623393 | -3.888428289 | 0.584199832  |
| ENSG00000211645 | IGLV1-50      | immunoglobulin lambda variable 1-50 (non-functional) [Source:HGNC Symbol;Acc:5881]             | -3.318923052 | 1.597409448  | 28.00240914 | 1.21E-07 | 4.10E-06 | 2.791786669  | 1.912023327  | -1.886652327 | -2.670141381 | 1.908000984  |
| ENSG00000164879 | CA3           | carbonic anhydrase III, muscle specific [Source:HGNC Symbol;Acc:1374]                          | -3.619983365 | 1.784552296  | 27.97699521 | 1.23E-07 | 4.14E-06 | 2.332130562  | 3.286151722  | -2.539967122 | -3.888428289 | 0.872340852  |
| ENSG00000171772 | SYCE1         | synaptonemal complex central element protein 1 [Source:HGNC Symbol;Acc:28852]                  | 3.595669334  | 0.085986365  | 27.92999752 | 1.26E-07 | 4.24E-06 | -1.756270337 | -1.507080648 | -0.520331194 | 1.39816257   | 0.04992943   |
| ENSG00000180573 | HIST1H2AC     | histone cluster 1, H2ac [Source:HGNC Symbol;Acc:4733]                                          | 2.405598976  | 5.798357322  | 27.88326526 | 1.29E-07 | 4.33E-06 | 4.080332569  | 4.447875012  | 5.658180351  | 6.988468895  | 5.948414135  |
| ENSG00000258445 | RP11-307P22.1 |                                                                                                | -2.340624379 | 3.09800257   | 27.84778322 | 1.31E-07 | 4.41E-06 | 4.128673657  | 3.721949827  | 1.450281721  | 0.527247606  | 2.938038295  |
| ENSG00000183098 | GPC6          | glypican 6 [Source:HGNC Symbol;Acc:4454]                                                       | -5.141621216 | 0.102007709  | 27.82675646 | 1.33E-07 | 4.44E-06 | 1.32517403   | 1.289608822  | -4.621297774 | -7.002070102 | -4.610216385 |
| ENSG00000254709 | IGLL5         | immunoglobulin lambda-like polypeptide 5 [Source:HGNC Symbol;Acc:38476]                        | -2.733894646 | 2.594151788  | 27.79461939 | 1.35E-07 | 4.51E-06 | 3.617390898  | 2.658749679  | -0.329705368 | -0.296766077 | 3.285646864  |
| ENSG00000140937 | CDH11         | cadherin 11, type 2, OB-cadherin (osteoblast) [Source:HGNC Symbol;Acc:1750]                    | -8.963791489 | 0.510440861  | 27.76955549 | 1.37E-07 | 4.56E-06 | 2.167064212  | 1.16603332   | -7.002070102 | -7.002070102 | -3.754655114 |
| ENSG00000168078 | PBK           | PDZ binding kinase [Source:HGNC Symbol;Acc:18282]                                              | -2.396359137 | 2.775804737  | 27.4142669  | 1.64E-07 | 5.47E-06 | 3.909466259  | 3.570041503  | 0.505333341  | 0.642123966  | 2.018338105  |
| ENSG00000109265 | KIAA1211      | KIAA1211 [Source:HGNC Symbol;Acc:29219]                                                        | -2.619777054 | 3.260919612  | 27.38319658 | 1.67E-07 | 5.54E-06 | 4.183097611  | 4.13363576   | -0.329705368 | 1.523337554  | 3.04038489   |
| ENSG00000067048 | DDX3Y         | DEAD (Asp-Glu-Ala-Asp) box helicase 3, Y-linked [Source:HGNC Symbol;Acc:2699]                  | 7.427643273  | 6.002986998  | 27.38293313 | 1.67E-07 | 5.54E-06 | -0.250832646 | 0.095631612  | -0.390491059 | 7.6412226    | 6.88338704   |
| ENSG00000127920 | GNG11         | guanine nucleotide binding protein (G protein), gamma 11 [Source:HGNC Symbol;Acc:4403]         | 2.697581591  | 4.946711885  | 27.37534465 | 1.68E-07 | 5.55E-06 | 2.6444045    | 3.356486108  | 4.470369175  | 6.089437782  | 5.559778477  |
| ENSG00000163535 | SGOL2         | shugoshin-like 2 (S. pombe) [Source:HGNC Symbol;Acc:30812]                                     | -1.981350224 | 3.994686598  | 27.34116976 | 1.71E-07 | 5.64E-06 | 4.706360385  | 4.693025375  | 2.34945221   | 2.303059008  | 4.121640215  |
| ENSG00000157168 | NRG1          | neuregulin 1 [Source:HGNC Symbol;Acc:7997]                                                     | 2.503944362  | 3.874552093  | 27.25578386 | 1.78E-07 | 5.88E-06 | 0.597320328  | 1.418980604  | 2.56487414   | 3.946411867  | 5.573900552  |
| ENSG00000162407 | PPAP2B        | phosphatidic acid phosphatase type 2B [Source:HGNC Symbol;Acc:9229]                            | -2.718831022 | 2.119977312  | 27.24707727 | 1.79E-07 | 5.90E-06 | 3.462559037  | 2.916017525  | -0.66302287  | -0.406691783 | 0.551948963  |
| ENSG00000119865 | CNR1P1        | cannabinoid receptor interacting protein 1 [Source:HGNC Symbol;Acc:24546]                      | -3.113106038 | 3.918335105  | 27.07541974 | 1.96E-07 | 6.43E-06 | 5.133625684  | 4.707344697  | -0.99931534  | 1.914722448  | 3.290541751  |
| ENSG00000170522 | ELOVL6        | ELOVL fatty acid elongase 6 [Source:HGNC Symbol;Acc:15829]                                     | -2.029044029 | 4.260465503  | 27.06032373 | 1.97E-07 | 6.47E-06 | 5.158416133  | 4.95944769   | 3.286590651  | 2.249705807  | 3.827080113  |
| ENSG00000138411 | HECW2         | HECT, C2 and WW domain containing E3 ubiquitin protein ligase 2 [Source:HGNC Symbol;Acc:29853] | 3.382835494  | 0.189184233  | 27.01487699 | 2.02E-07 | 6.61E-06 | -1.608074432 | -1.629706251 | -0.059127673 | 1.36509501   | 0.303422373  |
| ENSG00000205639 | MFS2B         | major facilitator superfamily domain containing 2B [Source:HGNC Symbol;Acc:37207]              | -2.488078634 | 4.007209093  | 27.01061722 | 2.02E-07 | 6.61E-06 | 4.760202192  | 5.076838692  | 1.076464519  | 2.551085884  | 3.490962768  |
| ENSG00000175746 | C15orf54      | chromosome 15 open reading frame 54 [Source:HGNC Symbol;Acc:33797]                             | 3.691270113  | 0.281778527  | 26.90131288 | 2.14E-07 | 6.99E-06 | -2.322346157 | -0.932821174 | 0.471574783  | 1.745170531  | -1.70800759  |
| ENSG00000130770 | ATPIF1        | ATPase inhibitory factor 1 [Source:HGNC Symbol;Acc:871]                                        | -1.737096194 | 6.207730144  | 26.87490682 | 2.17E-07 | 7.07E-06 | 6.990648113  | 6.828810736  | 5.345190169  | 5.073060563  | 5.757453315  |
| ENSG00000112936 | C7            | complement component 7 [Source:HGNC Symbol;Acc:1346]                                           | -5.111235137 | 0.702176071  | 26.84990598 | 2.20E-07 | 7.15E-06 | 2.071376358  | 1.773719635  | -4.621297774 | -7.002070102 | -2.832686105 |
| ENSG00000007541 | PIGQ          | phosphatidylinositol glycan anchor biosynthesis, class Q [Source:HGNC Symbol;Acc:14135]        | -1.698979848 | 6.396892099  | 26.76155709 | 2.30E-07 | 7.47E-06 | 7.025108654  | 7.152682415  | 5.518446459  | 5.403344377  | 5.914729217  |
| ENSG00000165152 | TMEM246       | transmembrane protein 246 [Source:HGNC Symbol;Acc:28180]                                       | -2.91531355  | 2.171519986  | 26.75432665 | 2.31E-07 | 7.48E-06 | 3.420029142  | 2.932364153  | -2.845623393 | -0.406691783 | 1.580441325  |
| ENSG00000203999 | RP11-290F20.1 |                                                                                                | 3.980501681  | 1.250520337  | 26.70354975 | 2.37E-07 | 7.67E-06 | -1.47369337  | -2.475439898 | -1.57307192  | 1.937395883  | 2.800681624  |
| ENSG00000248323 | LUCAT1        | lung cancer associated transcript 1 (non-protein coding) [Source:HGNC Symbol;Acc:48498]        | 4.430500279  | 1.547395022  | 26.64811546 | 2.44E-07 | 7.88E-06 | -0.942926472 | -1.763731145 | -0.453950945 | 2.947141733  | 2.3444256    |
| ENSG00000159189 | C1QC          | complement component 1, q subcomponent, C chain [Source:HGNC Symbol;Acc:1245]                  | -2.895027602 | 1.945464255  | 26.62791831 | 2.47E-07 | 7.94E-06 | 3.326414242  | 2.361613919  | -0.66302287  | -1.042179808 | 1.428856327  |
| ENSG00000225342 | AC079630.4    |                                                                                                | 3.946202256  | -0.424353064 | 26.60167411 | 2.50E-07 | 8.04E-06 | -3.79890385  | -1.91149394  | -0.907612816 | 0.369457657  | 0.378903451  |
| ENSG00000112118 | MCM3          | minichromosome maintenance complex component 3 [Source:HGNC Symbol;Acc:6945]                   | -1.831836807 | 6.659171465  | 26.5903903  | 2.51E-07 | 8.07E-06 | 7.322478468  | 7.301680528  | 5.841151855  | 5.044626073  | 6.598170193  |

|                 |               |                                                                                                                                              |              |              |             |          |          |              |              |              |              |              |
|-----------------|---------------|----------------------------------------------------------------------------------------------------------------------------------------------|--------------|--------------|-------------|----------|----------|--------------|--------------|--------------|--------------|--------------|
| ENSG00000100350 | FOXRED2       | FAD-dependent oxidoreductase domain containing 2 [Source:HGNC Symbol;Acc:26264]                                                              | -2.014041535 | 3.770194571  | 26.54242008 | 2.58E-07 | 8.26E-06 | 4.52961579   | 4.595461025  | 2.507726234  | 1.75796486   | 3.532875847  |
| ENSG00000175305 | CCNE2         | cyclin E2 [Source:HGNC Symbol;Acc:1590]                                                                                                      | -2.240269143 | 2.954012939  | 26.49221612 | 2.65E-07 | 8.46E-06 | 3.449931193  | 3.75908114   | 0.6928072    | 0.669468625  | 3.430160334  |
| ENSG00000171385 | KCND3         | potassium voltage-gated channel, Shal-related subfamily, member 3 [Source:HGNC Symbol;Acc:6239]                                              | 3.270711272  | 0.620630574  | 26.44791039 | 2.71E-07 | 8.64E-06 | -0.942926472 | -1.289265519 | 0.210162819  | 1.856429106  | 0.763888603  |
| ENSG00000224607 | IGKV1D-27     | immunoglobulin kappa variable 1D-27 (pseudogene) [Source:HGNC Symbol;Acc:5751]                                                               | -3.903529313 | 1.150530636  | 26.34044641 | 2.86E-07 | 9.12E-06 | 2.688072143  | 1.403429499  | -2.539967122 | -4.730697034 | 0.615745481  |
| ENSG00000164087 | POC1A         | POC1 centriolar protein A [Source:HGNC Symbol;Acc:24488]                                                                                     | -2.184476768 | 3.174676464  | 26.32689048 | 2.88E-07 | 9.17E-06 | 4.001759993  | 3.918010484  | 1.007464306  | 1.331251704  | 3.199787516  |
| ENSG00000197496 | SLC2A10       | solute carrier family 2 (facilitated glucose transporter), member 10 [Source:HGNC Symbol;Acc:13444]                                          | -4.448229266 | 1.041863982  | 26.26899878 | 2.97E-07 | 9.43E-06 | 2.37729083   | 1.85599892   | -7.002070102 | -3.888428289 | 0.139468177  |
| ENSG00000181856 | SLC2A4        | solute carrier family 2 (facilitated glucose transporter), member 4 [Source:HGNC Symbol;Acc:11009]                                           | -5.037181025 | 0.913214285  | 26.2447832  | 3.01E-07 | 9.53E-06 | 1.780020869  | 2.107040151  | -4.621297774 | -7.002070102 | 0.378903451  |
| ENSG00000075702 | WDR62         | WD repeat domain 62 [Source:HGNC Symbol;Acc:24502]                                                                                           | -2.056640528 | 3.609950066  | 26.2393016  | 3.02E-07 | 9.54E-06 | 4.386750265  | 4.16855421   | 1.907011864  | 1.567613022  | 3.921613159  |
| ENSG00000167536 | DHRS13        | dehydrogenase/reductase (SDR family) member 13 [Source:HGNC Symbol;Acc:28326]                                                                | -1.722400193 | 4.837734553  | 26.17285748 | 3.12E-07 | 9.86E-06 | 5.525365311  | 5.600352436  | 3.95448688   | 3.628851426  | 4.338041939  |
| ENSG00000128322 | IGLL1         | immunoglobulin lambda-like polypeptide 1 [Source:HGNC Symbol;Acc:5870]                                                                       | -2.22947271  | 3.344133474  | 26.16121436 | 3.14E-07 | 9.90E-06 | 3.621150429  | 3.086385644  | 0.505333341  | 0.61425099   | 4.745235504  |
| ENSG00000136840 | ST6GALNAC4    | ST6 (alpha-N-acetyl-neuraminyl-2,3-beta-galactosyl-1,3)-N-acetylgalactosaminide alpha-2,6-sialyltransferase 4 [Source:HGNC Symbol;Acc:17846] | -1.801489658 | 5.158796639  | 26.14395789 | 3.17E-07 | 9.97E-06 | 5.854049734  | 5.973159515  | 4.384539572  | 3.642714894  | 4.600983593  |
| ENSG00000166793 | YPEL4         | yippee-like 4 (Drosophila) [Source:HGNC Symbol;Acc:18328]                                                                                    | -2.521842763 | 2.796789332  | 26.10720568 | 3.23E-07 | 1.01E-05 | 3.449931193  | 3.987451996  | 1.379231566  | -0.099242291 | 2.030092686  |
| ENSG00000151650 | VENTX         | VENT homeobox [Source:HGNC Symbol;Acc:13639]                                                                                                 | 2.700805161  | 4.242916055  | 26.07498989 | 3.28E-07 | 1.03E-05 | 1.96888231   | 2.825562359  | 3.939130343  | 5.59200618   | 4.306975745  |
| ENSG0000011837  | MAK           | male germ cell-associated kinase [Source:HGNC Symbol;Acc:6816]                                                                               | 3.841411087  | 1.12629384   | 25.98450471 | 3.44E-07 | 1.08E-05 | -0.942926472 | -1.289265519 | -0.390491059 | 2.50629229   | 1.702990823  |
| ENSG00000237075 | RP11-497H16.2 |                                                                                                                                              | 4.825767864  | 3.458404887  | 25.9730183  | 3.46E-07 | 1.08E-05 | -0.14487434  | 0.376157587  | 1.205290011  | 5.493125     | 2.334979851  |
| ENSG00000137699 | TRIM29        | tripartite motif containing 29 [Source:HGNC Symbol;Acc:17274]                                                                                | -5.124709048 | 0.402168791  | 25.95861091 | 3.49E-07 | 1.09E-05 | 1.696960037  | 1.464652754  | -7.002070102 | -4.730697034 | -2.060109799 |
| ENSG00000104147 | OIP5          | Opa interacting protein 5 [Source:HGNC Symbol;Acc:20300]                                                                                     | -2.611617678 | 2.134619797  | 25.92879715 | 3.54E-07 | 1.10E-05 | 3.241034999  | 2.831385036  | -0.589913612 | -0.797916568 | 1.945725455  |
| ENSG00000230481 | IGKV1OR22-5   | immunoglobulin kappa variable 1/OR22-5 (pseudogene) [Source:HGNC Symbol;Acc:5773]                                                            | -8.720518914 | 0.356772217  | 25.92032862 | 3.56E-07 | 1.11E-05 | 1.623891846  | 1.202433699  | -7.002070102 | -7.002070102 | -0.506781561 |
| ENSG00000260903 | XKR7          | XK, Kell blood group complex subunit-related family, member 7 [Source:HGNC Symbol;Acc:23062]                                                 | 3.078008124  | -0.02086228  | 25.82423731 | 3.74E-07 | 1.16E-05 | -1.47369337  | -1.191564836 | -0.215316613 | 0.894716898  | 0.182236344  |
| ENSG00000136859 | ANGPTL2       | angiopoietin-like 2 [Source:HGNC Symbol;Acc:490]                                                                                             | -8.079867731 | -0.350073707 | 25.80516498 | 3.78E-07 | 1.17E-05 | 1.018120824  | 0.555709266  | -7.002070102 | -7.002070102 | -3.221241555 |
| ENSG00000196230 | TUBB          | tubulin, beta class I [Source:HGNC Symbol;Acc:20778]                                                                                         | -2.276798478 | 8.914288153  | 25.79301573 | 3.80E-07 | 1.17E-05 | 9.669927692  | 9.640336798  | 7.505547211  | 7.543462522  | 8.751957553  |
| ENSG00000135916 | ITM2C         | integral membrane protein 2C [Source:HGNC Symbol;Acc:6175]                                                                                   | -1.944054769 | 5.941476481  | 25.79144446 | 3.80E-07 | 1.17E-05 | 6.608088569  | 6.392917765  | 5.005158829  | 3.886500298  | 6.295025729  |
| ENSG00000140451 | PIF1          | PIF1 5'-to-3' DNA helicase [Source:HGNC Symbol;Acc:26220]                                                                                    | -2.2286959   | 3.001324092  | 25.76066825 | 3.86E-07 | 1.19E-05 | 3.984351473  | 3.442696095  | 1.076464519  | 0.847612951  | 3.194574245  |
| ENSG00000075618 | FSCN1         | fascin homolog 1, actin-bundling protein (Strongylocentrotus purpuratus) [Source:HGNC Symbol;Acc:11148]                                      | -1.981326776 | 3.895344279  | 25.74714057 | 3.89E-07 | 1.20E-05 | 4.763607814  | 4.399701841  | 2.404162378  | 2.096958951  | 4.025090588  |
| ENSG00000172236 | TPSAB1        | trypsin alpha/beta 1 [Source:HGNC Symbol;Acc:12019]                                                                                          | -4.266043637 | 3.744238733  | 25.74354533 | 3.90E-07 | 1.20E-05 | 5.797857325  | 2.948527637  | -0.390491059 | 1.0274492    | -0.726511138 |
| ENSG00000253705 | IGHV3-41      | immunoglobulin heavy variable 3-41 (pseudogene) [Source:HGNC Symbol;Acc:5602]                                                                | -3.801571891 | 0.674870021  | 25.73231721 | 3.92E-07 | 1.20E-05 | 1.945089405  | 1.479561055  | -3.766908349 | -3.888428289 | -0.147769603 |
| ENSG00000049759 | NEDD4L        | neural precursor cell expressed, developmentally down-regulated 4-like, E3 ubiquitin protein ligase [Source:HGNC Symbol;Acc:7728]            | -1.944112511 | 3.792474293  | 25.73140846 | 3.92E-07 | 1.20E-05 | 4.519579521  | 4.530729604  | 2.413082378  | 2.475638093  | 3.589580856  |
| ENSG00000123119 | NECAB1        | N-terminal EF-hand calcium binding protein 1 [Source:HGNC Symbol;Acc:20983]                                                                  | -3.455996593 | 1.413140854  | 25.6604304  | 4.07E-07 | 1.24E-05 | 2.636996308  | 2.329059307  | -4.621297774 | -2.419096061 | 0.615745481  |

|                 |               |                                                                                                                 |              |              |             |          |          |              |              |              |              |              |
|-----------------|---------------|-----------------------------------------------------------------------------------------------------------------|--------------|--------------|-------------|----------|----------|--------------|--------------|--------------|--------------|--------------|
| ENSG00000135929 | CYP27A1       | cytochrome P450, family 27, subfamily A, polypeptide 1 [Source:HGNC Symbol;Acc:2605]                            | 2.463366205  | 5.653431562  | 25.58830105 | 4.23E-07 | 1.29E-05 | 3.528102002  | 4.505458803  | 5.445328656  | 6.844445403  | 5.873730193  |
| ENSG00000063241 | ISOC2         | isochorismatase domain containing 2 [Source:HGNC Symbol;Acc:26278]                                              | -1.843133957 | 4.240193447  | 25.56859294 | 4.27E-07 | 1.30E-05 | 5.138880244  | 4.903888565  | 3.180883743  | 2.824787032  | 3.68560772   |
| ENSG00000134121 | CHL1          | cell adhesion molecule L1-like [Source:HGNC Symbol;Acc:1939]                                                    | -2.838974589 | 1.797521294  | 25.46008212 | 4.52E-07 | 1.37E-05 | 2.80506858   | 2.813846027  | -2.845623393 | -0.7248947   | 1.198257616  |
| ENSG00000233864 | TTY15         | testis-specific transcript, Y-linked 15 (non-protein coding) [Source:HGNC Symbol;Acc:18567]                     | 5.388786505  | 2.072000589  | 25.38985505 | 4.68E-07 | 1.42E-05 | -2.108017771 | -2.076136033 | -4.621297774 | 3.225676865  | 3.447795505  |
| ENSG00000271375 | RP11-295P22.2 |                                                                                                                 | -3.98472658  | 0.746968763  | 25.37542733 | 4.72E-07 | 1.43E-05 | 2.332130562  | 1.255368251  | -3.233942493 | -4.730697034 | -0.894110176 |
| ENSG00000258648 | UBE2CP1       | ubiquitin-conjugating enzyme E2C pseudogene 1 [Source:HGNC Symbol;Acc:19670]                                    | -3.00643398  | 1.12804579   | 25.34618751 | 4.79E-07 | 1.45E-05 | 2.026722384  | 2.068117593  | -2.073364206 | -2.419096061 | 0.948644093  |
| ENSG00000171798 | KNDC1         | kinase non-catalytic C-lobe domain (KIND) containing 1 [Source:HGNC Symbol;Acc:29374]                           | 2.617598211  | 2.301052942  | 25.30456815 | 4.90E-07 | 1.48E-05 | 0.566455146  | 1.551875699  | 2.694908712  | 3.42334388   | 1.446507348  |
| ENSG00000232528 | RP4-673D20.3  |                                                                                                                 | 3.426382032  | -0.235454482 | 25.28146085 | 4.95E-07 | 1.49E-05 | -1.921450438 | -2.262017103 | -0.740035668 | 0.823471408  | 0.182236344  |
| ENSG00000241527 | CA15P1        | carbonic anhydrase XV, pseudogene 1 [Source:HGNC Symbol;Acc:44364]                                              | 4.046877262  | -0.734971712 | 25.23441054 | 5.08E-07 | 1.53E-05 | -2.879434292 | -3.940353384 | -2.073364206 | 0.301169826  | 0.095393329  |
| ENSG00000230910 | RP3-525N10.2  |                                                                                                                 | 3.855758604  | 1.091552689  | 25.21998122 | 5.11E-07 | 1.53E-05 | -2.108017771 | -0.30308518  | 1.076464519  | 2.724061344  | -0.80787826  |
| ENSG00000086506 | HBQ1          | hemoglobin, theta 1 [Source:HGNC Symbol;Acc:4833]                                                               | -2.845285833 | 1.287983618  | 25.18557765 | 5.21E-07 | 1.56E-05 | 2.463579632  | 1.965953212  | -1.202308962 | -1.231517591 | 0.706443614  |
| ENSG00000188153 | COL4A5        | collagen, type IV, alpha 5 [Source:HGNC Symbol;Acc:2207]                                                        | -4.364562814 | 0.808049875  | 25.1700016  | 5.25E-07 | 1.57E-05 | 2.247099092  | 1.832965453  | -3.766908349 | -7.002070102 | -4.610216385 |
| ENSG00000127954 | STEAP4        | STEAP family member 4 [Source:HGNC Symbol;Acc:21923]                                                            | 2.108407791  | 4.89298552   | 25.06944102 | 5.53E-07 | 1.65E-05 | 2.973344712  | 3.520443902  | 4.51455366   | 5.376632009  | 6.013512509  |
| ENSG00000090013 | BLVRB         | biliverdin reductase B (flavin reductase (NADPH)) [Source:HGNC Symbol;Acc:1063]                                 | -2.051603014 | 6.795554803  | 25.05850202 | 5.56E-07 | 1.66E-05 | 7.546344528  | 7.508663577  | 4.927912984  | 5.930406088  | 6.564719069  |
| ENSG00000138792 | ENPEP         | glutamyl aminopeptidase (aminopeptidase A) [Source:HGNC Symbol;Acc:3355]                                        | -4.960793037 | 0.512691899  | 25.04805894 | 5.59E-07 | 1.66E-05 | 1.752861822  | 1.711936244  | -4.621297774 | -7.002070102 | -3.221241555 |
| ENSG00000130558 | OLFM1         | olfactomedin 1 [Source:HGNC Symbol;Acc:17187]                                                                   | 3.271426376  | 1.97652044   | 25.0246624  | 5.66E-07 | 1.68E-05 | 0.000762307  | 0.836121102  | 1.613958159  | 3.520398046  | 1.021113618  |
| ENSG00000106070 | GRB10         | growth factor receptor-bound protein 10 [Source:HGNC Symbol;Acc:4564]                                           | -1.97330756  | 4.175734033  | 25.01987615 | 5.67E-07 | 1.68E-05 | 4.927426575  | 4.888611111  | 2.430758609  | 3.070221344  | 4.019204856  |
| ENSG00000138180 | CEP55         | centrosomal protein 55kDa [Source:HGNC Symbol;Acc:1161]                                                         | -2.160508027 | 2.980377083  | 24.98610912 | 5.77E-07 | 1.71E-05 | 3.628640226  | 3.419690528  | 0.805492218  | 0.466186565  | 3.700395796  |
| ENSG00000119326 | CTNNAL1       | catenin (cadherin-associated protein), alpha-like 1 [Source:HGNC Symbol;Acc:2512]                               | -2.303981083 | 3.574199504  | 24.97394855 | 5.81E-07 | 1.72E-05 | 4.432399102  | 4.385920009  | 0.9100098    | 1.959718487  | 3.456532906  |
| ENSG00000248810 | RP11-362F19.1 |                                                                                                                 | 2.636782858  | 2.752959213  | 24.94813148 | 5.89E-07 | 1.74E-05 | 1.018120824  | 1.809558268  | 3.11133962   | 4.009294922  | 1.643016926  |
| ENSG00000129824 | RPS4Y1        | ribosomal protein S4, Y-linked 1 [Source:HGNC Symbol;Acc:10425]                                                 | 5.802949069  | 4.921510214  | 24.93807215 | 5.92E-07 | 1.74E-05 | 0.254194054  | -0.112176905 | -0.329705368 | 6.159216549  | 6.264875363  |
| ENSG00000257878 | RP11-256L6.3  |                                                                                                                 | 3.711416657  | -0.012077043 | 24.89457782 | 6.06E-07 | 1.78E-05 | -1.47369337  | -2.726009782 | -0.99931534  | 1.224680533  | 0.415212929  |
| ENSG00000235513 | RP4-756G23.5  |                                                                                                                 | 3.777929101  | 0.070631397  | 24.82738026 | 6.27E-07 | 1.84E-05 | -2.879434292 | -1.289265519 | -0.740035668 | 1.314027603  | 0.415212929  |
| ENSG00000123700 | KCNJ2         | potassium inwardly-rectifying channel, subfamily J, member 2 [Source:HGNC Symbol;Acc:6263]                      | 2.948508541  | 2.58930131   | 24.8221538  | 6.29E-07 | 1.84E-05 | 0.435934254  | -0.583862591 | 1.703933103  | 2.622783341  | 4.206962975  |
| ENSG00000253525 | CTD-2114J12.1 |                                                                                                                 | -4.956820244 | 0.334048638  | 24.74130661 | 6.56E-07 | 1.92E-05 | 1.623891846  | 1.387708937  | -7.002070102 | -4.730697034 | -2.060109799 |
| ENSG00000106546 | AHR           | aryl hydrocarbon receptor [Source:HGNC Symbol;Acc:348]                                                          | 2.366773403  | 6.676855818  | 24.67941757 | 6.77E-07 | 1.98E-05 | 4.851046282  | 5.568459271  | 6.6538419    | 8.03154189   | 6.181690116  |
| ENSG00000139514 | SLC7A1        | solute carrier family 7 (cationic amino acid transporter, y+ system), member 1 [Source:HGNC Symbol;Acc:11057]   | -1.7027906   | 5.793718559  | 24.65763201 | 6.85E-07 | 2.00E-05 | 6.274420125  | 6.662803985  | 5.064392409  | 4.388262566  | 5.456852822  |
| ENSG00000237781 | RP11-54A4.2   |                                                                                                                 | 3.517598461  | 1.094318728  | 24.63131484 | 6.94E-07 | 2.02E-05 | -1.132483902 | -0.713501401 | -0.215316613 | 2.36290873   | 1.732068029  |
| ENSG00000109685 | WHSC1         | Wolf-Hirschhorn syndrome candidate 1 [Source:HGNC Symbol;Acc:12766]                                             | -1.661843599 | 6.752684289  | 24.55010779 | 7.24E-07 | 2.10E-05 | 7.20777661   | 7.480686038  | 5.927728104  | 5.667691125  | 6.654312605  |
| ENSG00000100181 | TPTEP1        | transmembrane phosphatase with tensin homology pseudogene 1 [Source:HGNC Symbol;Acc:43648]                      | 3.814001435  | 4.056845149  | 24.52107855 | 7.35E-07 | 2.13E-05 | 0.714573228  | 1.889873947  | 2.709464044  | 5.625553375  | 4.436279042  |
| ENSG00000213318 | RP11-331F4.1  |                                                                                                                 | 5.876950059  | 4.960227185  | 24.48830534 | 7.48E-07 | 2.17E-05 | -0.094677427 | -0.252938016 | -0.010608983 | 6.090070331  | 6.401234604  |
| ENSG00000103257 | SLC7A5        | solute carrier family 7 (amino acid transporter light chain, L system), member 5 [Source:HGNC Symbol;Acc:11063] | -1.618637107 | 5.299956568  | 24.4257039  | 7.72E-07 | 2.23E-05 | 5.830698698  | 6.035018876  | 4.340799889  | 3.923880795  | 5.276169588  |
| ENSG00000186354 | C9orf47       | chromosome 9 open reading frame 47 [Source:HGNC Symbol;Acc:23669]                                               | 4.281677283  | 1.540853488  | 24.40147443 | 7.82E-07 | 2.26E-05 | -0.775407551 | -1.394066322 | -0.161352853 | 3.284338193  | 1.3928929    |
| ENSG00000137563 | GGH           | gamma-glutamyl hydrolase (conjugase, folypolyglutamyl hydrolase) [Source:HGNC Symbol;Acc:4248]                  | -2.148644577 | 3.232620037  | 24.31682337 | 8.17E-07 | 2.36E-05 | 4.139199645  | 3.69346042   | 1.142314722  | 1.12943269   | 3.557451401  |

|                 |               |                                                                                                                           |              |             |             |          |          |              |              |              |              |              |
|-----------------|---------------|---------------------------------------------------------------------------------------------------------------------------|--------------|-------------|-------------|----------|----------|--------------|--------------|--------------|--------------|--------------|
| ENSG00000179588 | ZFPM1         | zinc finger protein, FOG family member 1 [Source:HGNC Symbol;Acc:19762]                                                   | -1.670597452 | 4.765375267 | 24.20431003 | 8.66E-07 | 2.49E-05 | 5.538346965  | 5.459885251  | 3.816750433  | 3.632329802  | 4.224973246  |
| ENSG00000108576 | SLC6A4        | solute carrier family 6 (neurotransmitter transporter), member 4 [Source:HGNC Symbol;Acc:11050]                           | 3.39948568   | 0.312836465 | 24.19674309 | 8.70E-07 | 2.50E-05 | -2.108017771 | -0.408932621 | 0.210162819  | 1.348272594  | 0.303422373  |
| ENSG00000237249 | RP1-102G20.2  |                                                                                                                           | -3.978760376 | 0.614147193 | 24.18610058 | 8.75E-07 | 2.51E-05 | 1.414540624  | 1.867379203  | -7.002070102 | -3.360122781 | -0.147769603 |
| ENSG00000135045 | C9orf40       | chromosome 9 open reading frame 40 [Source:HGNC Symbol;Acc:23433]                                                         | -2.085009129 | 3.025719754 | 24.17174153 | 8.81E-07 | 2.52E-05 | 3.98142952   | 3.743725731  | 1.732719555  | 1.069111613  | 2.537970241  |
| ENSG00000112175 | BMP5          | bone morphogenetic protein 5 [Source:HGNC Symbol;Acc:1072]                                                                | -8.954581938 | 0.39321376  | 24.16524451 | 8.84E-07 | 2.53E-05 | 2.071376358  | 1.03087254   | -7.002070102 | -7.002070102 | -7.002070102 |
| ENSG00000173210 | ABLIM3        | actin binding LIM protein family, member 3 [Source:HGNC Symbol;Acc:29132]                                                 | 2.592074784  | 3.304193947 | 24.1533364  | 8.90E-07 | 2.54E-05 | 1.287817526  | 1.986973075  | 3.072456242  | 4.479923268  | 3.581615324  |
| ENSG00000127252 | HRASL5        | HRAS-like suppressor [Source:HGNC Symbol;Acc:14922]                                                                       | 3.724260427  | -0.4427703  | 24.14602941 | 8.93E-07 | 2.54E-05 | -2.108017771 | -2.475439898 | -2.539967122 | 0.722650538  | 0.223773082  |
| ENSG00000174776 | WDR49         | WD repeat domain 49 [Source:HGNC Symbol;Acc:26587]                                                                        | 3.558889903  | 1.259333563 | 24.13695127 | 8.97E-07 | 2.55E-05 | -0.775407551 | -0.408932621 | 0.168628767  | 2.794059013  | 1.177268129  |
| ENSG00000163251 | FZD5          | frizzled family receptor 5 [Source:HGNC Symbol;Acc:4043]                                                                  | -2.339116399 | 2.880626113 | 24.10498908 | 9.12E-07 | 2.59E-05 | 3.54006658   | 3.765177832  | 0.168628767  | 1.261086007  | 2.956635145  |
| ENSG00000159713 | TPPP3         | tubulin polymerization-promoting protein family member 3 [Source:HGNC Symbol;Acc:24162]                                   | 2.722631076  | 3.553862179 | 24.0726972  | 9.28E-07 | 2.63E-05 | 1.306616686  | 2.261659784  | 3.334328805  | 4.923509977  | 3.421261246  |
| ENSG00000180190 | TDRP          | testis development related protein [Source:HGNC Symbol;Acc:26951]                                                         | 3.722397465  | 1.221698542 | 24.03142525 | 9.48E-07 | 2.68E-05 | -1.921450438 | -0.025429826 | 0.401591237  | 2.60872607   | 1.428856327  |
| ENSG00000164109 | MAD2L1        | MAD2 mitotic arrest deficient-like 1 (yeast) [Source:HGNC Symbol;Acc:6763]                                                | -2.024149889 | 3.400532977 | 23.96434716 | 9.81E-07 | 2.77E-05 | 4.321238306  | 4.138340674  | 2.253389193  | 1.224680533  | 2.962781202  |
| ENSG00000113810 | SMC4          | structural maintenance of chromosomes 4 [Source:HGNC Symbol;Acc:14013]                                                    | -1.633459198 | 6.688061311 | 23.933113   | 9.97E-07 | 2.82E-05 | 7.213079789  | 7.35368656   | 5.829538813  | 5.382840447  | 6.71063621   |
| ENSG00000113231 | PDE8B         | phosphodiesterase 8B [Source:HGNC Symbol;Acc:8794]                                                                        | 2.823368066  | 0.066827687 | 23.92462344 | 1.00E-06 | 2.82E-05 | -1.350769713 | -0.713501401 | 0.210162819  | 0.847612951  | 0.002986071  |
| ENSG00000198732 | SMOC1         | SPARC related modular calcium binding 1 [Source:HGNC Symbol;Acc:20318]                                                    | -3.675858669 | 0.974377863 | 23.88382492 | 1.02E-06 | 2.88E-05 | 2.446729819  | 1.85599892   | -7.002070102 | -2.670141381 | -1.87334355  |
| ENSG00000099377 | HSD3B7        | hydroxy-delta-5-steroid dehydrogenase, 3 beta- and steroid delta-isomerase 7 [Source:HGNC Symbol;Acc:18324]               | -2.320076411 | 2.356844948 | 23.868083   | 1.03E-06 | 2.89E-05 | 3.437191842  | 3.086385644  | 0.168628767  | 0.556835562  | 1.760570749  |
| ENSG00000131462 | TUBG1         | tubulin, gamma 1 [Source:HGNC Symbol;Acc:12417]                                                                           | -2.093337992 | 3.078906016 | 23.86901015 | 1.03E-06 | 2.89E-05 | 3.906388466  | 4.026044706  | 1.32354911   | 1.745170531  | 2.257101262  |
| ENSG00000186871 | ERCC6L        | excision repair cross-complementing rodent repair deficiency, complementation group 6-like [Source:HGNC Symbol;Acc:20794] | -2.47935499  | 2.665429083 | 23.79961486 | 1.07E-06 | 2.99E-05 | 3.639802517  | 3.576989707  | 1.184602189  | -1.231517591 | 2.109797605  |
| ENSG00000048140 | TSPAN17       | tetraspanin 17 [Source:HGNC Symbol;Acc:13594]                                                                             | -1.602213184 | 6.391783173 | 23.80139073 | 1.07E-06 | 2.99E-05 | 7.037470417  | 7.096973808  | 5.467976758  | 5.545720136  | 5.913936412  |
| ENSG00000174837 | EMR1          | egf-like module containing, mucin-like, hormone receptor-like 1 [Source:HGNC Symbol;Acc:3336]                             | 2.028312223  | 5.504134532 | 23.76056894 | 1.09E-06 | 3.04E-05 | 3.733087128  | 4.72152329   | 5.660991275  | 6.480992576  | 5.55718077   |
| ENSG00000272839 | RP11-452C13.1 |                                                                                                                           | 4.017188794  | 0.047412644 | 23.69828292 | 1.13E-06 | 3.14E-05 | -2.879434292 | -1.629706251 | -1.097244829 | 1.27894994   | 0.615745481  |
| ENSG00000226091 | LINC00937     | long intergenic non-protein coding RNA 937 [Source:HGNC Symbol;Acc:48629]                                                 | 2.981106411  | 3.922047042 | 23.66063205 | 1.15E-06 | 3.20E-05 | 1.431768352  | 2.477541651  | 3.380537789  | 5.450411635  | 3.707733377  |
| ENSG00000258944 | RP4-647C14.3  |                                                                                                                           | 3.050788333  | 1.468964982 | 23.57705669 | 1.20E-06 | 3.33E-05 | -0.196880952 | -0.30308518  | 1.225685365  | 2.717526241  | 1.564363944  |
| ENSG00000138080 | EMILIN1       | elastin microfibril interfacer 1 [Source:HGNC Symbol;Acc:19880]                                                           | -2.11313037  | 2.758568233 | 23.57293651 | 1.20E-06 | 3.34E-05 | 3.376207305  | 3.667655396  | 1.142314722  | 0.642123966  | 2.737560122  |
| ENSG00000106341 | PPP1R17       | protein phosphatase 1, regulatory subunit 17 [Source:HGNC Symbol;Acc:16973]                                               | 2.755638924  | -0.12308817 | 23.56087258 | 1.21E-06 | 3.35E-05 | -1.237502295 | -0.713501401 | 0.437007322  | 0.335717742  | -0.57637152  |
| ENSG00000108846 | ABCC3         | ATP-binding cassette, sub-family C (CFTR/MRP), member 3 [Source:HGNC Symbol;Acc:54]                                       | 2.542799409  | 5.019566108 | 23.40648646 | 1.31E-06 | 3.63E-05 | 2.70942011   | 3.918010484  | 4.749255852  | 6.380638865  | 4.906969078  |
| ENSG00000204169 | AGAP7         | ArfGAP with GTPase domain, ankyrin repeat and PH domain 7 [Source:HGNC Symbol;Acc:23465]                                  | 4.142520822  | 1.054243487 | 23.39049069 | 1.32E-06 | 3.65E-05 | -1.756270337 | -0.583862591 | -0.66302287  | 2.818693563  | 0.485200289  |
| ENSG00000168874 | ATOH8         | atonal homolog 8 (Drosophila) [Source:HGNC Symbol;Acc:24126]                                                              | 3.170972186  | 1.401428706 | 23.35707975 | 1.35E-06 | 3.71E-05 | -0.250832646 | -0.408932621 | 0.210162819  | 2.436381066  | 2.257101262  |
| ENSG00000118520 | ARG1          | arginase 1 [Source:HGNC Symbol;Acc:663]                                                                                   | -2.862413338 | 2.831085295 | 23.2333335  | 1.43E-06 | 3.95E-05 | 3.402659809  | 1.900991143  | -0.99931534  | -1.336401299 | 4.335675838  |
| ENSG00000090889 | KIF4A         | kinesin family member 4A [Source:HGNC Symbol;Acc:13339]                                                                   | -2.771453332 | 1.646309731 | 23.19602361 | 1.46E-06 | 4.02E-05 | 2.521050858  | 2.528610122  | -1.886652327 | -2.205328685 | 1.746389777  |
| ENSG00000198336 | MYL4          | myosin, light chain 4, alkali; atrial, embryonic [Source:HGNC Symbol;Acc:7585]                                            | -2.251143083 | 4.018968197 | 23.18577214 | 1.47E-06 | 4.03E-05 | 4.725696366  | 5.220204443  | 1.613958159  | 2.794059013  | 2.800681624  |
| ENSG00000184551 | AC132872.1    |                                                                                                                           | 3.973387113  | 0.619101761 | 23.16434907 | 1.49E-06 | 4.07E-05 | -1.350769713 | -1.629706251 | -1.097244829 | 2.258736156  | 0.485200289  |
| ENSG00000129988 | LBP           | lipopolysaccharide binding protein [Source:HGNC Symbol;Acc:6517]                                                          | -5.216586289 | 0.731192571 | 23.15386579 | 1.50E-06 | 4.09E-05 | 2.47193131   | 1.16603322   | -4.621297774 | -7.002070102 | -2.526883755 |

|                 |               |                                                                                                                                               |              |             |             |          |          |              |              |              |              |              |
|-----------------|---------------|-----------------------------------------------------------------------------------------------------------------------------------------------|--------------|-------------|-------------|----------|----------|--------------|--------------|--------------|--------------|--------------|
| ENSG00000237803 | LINC00211     | long intergenic non-protein coding RNA 211 [Source:HGNC Symbol;Acc:37459]                                                                     | 2.8109062    | 0.297360406 | 23.12611491 | 1.52E-06 | 4.14E-05 | -1.034594152 | -0.855949929 | 0.036330944  | 0.917704421  | 0.948644093  |
| ENSG00000127831 | VIL1          | villin 1 [Source:HGNC Symbol;Acc:12690]<br>apolipoprotein B mRNA editing enzyme, catalytic polypeptide-like 3A [Source:HGNC Symbol;Acc:17343] | 2.940102028  | 1.406434532 | 23.07379392 | 1.56E-06 | 4.25E-05 | -0.625332215 | 0.376157587  | 1.076464519  | 2.379562322  | 1.895203721  |
| ENSG00000128383 | APOBEC3A      | apolipoprotein B mRNA editing enzyme, catalytic polypeptide-like 3A [Source:HGNC Symbol;Acc:17343]                                            | 1.792936198  | 5.802631057 | 22.99551265 | 1.62E-06 | 4.42E-05 | 4.344166237  | 4.61584628   | 5.674964329  | 6.549744331  | 6.479408743  |
| ENSG00000231650 | RFESP1        | Rieske (Fe-S) domain containing pseudogene 1 [Source:HGNC Symbol;Acc:39420]                                                                   | -2.867545425 | 1.193647409 | 22.97481702 | 1.64E-06 | 4.46E-05 | 2.266432806  | 2.068117593  | -0.99931534  | -3.360122781 | 0.615745481  |
| ENSG00000114054 | PCCB          | propionyl CoA carboxylase, beta polypeptide [Source:HGNC Symbol;Acc:8654]                                                                     | -1.624331815 | 5.283210088 | 22.93912385 | 1.67E-06 | 4.54E-05 | 6.051554497  | 5.930395455  | 4.206153886  | 4.320880041  | 4.8401004    |
| ENSG00000137962 | ARHGAP29      | Rho GTPase activating protein 29 [Source:HGNC Symbol;Acc:30207]                                                                               | 2.877580066  | 0.50580046  | 22.86459229 | 1.74E-06 | 4.71E-05 | -0.425964666 | -0.782968247 | 0.328039018  | 1.538247531  | 0.415212929  |
| ENSG00000100427 | MLC1          | megalencephalic leukoencephalopathy with subcortical cysts 1 [Source:HGNC Symbol;Acc:17082]                                                   | -2.024208285 | 5.814493165 | 22.85683689 | 1.75E-06 | 4.72E-05 | 6.761168998  | 6.333127059  | 3.914214735  | 4.849230022  | 5.5788573    |
| ENSG00000102384 | CENPI         | centromere protein 1 [Source:HGNC Symbol;Acc:3968]                                                                                            | -2.338431996 | 2.155116432 | 22.79627344 | 1.80E-06 | 4.86E-05 | 3.145070257  | 2.948527637  | -0.161352853 | -0.46496394  | 1.920685729  |
| ENSG00000230006 | ANKRD36BP2    | ankyrin repeat domain 36B pseudogene 2 [Source:HGNC Symbol;Acc:33607]                                                                         | -1.991612219 | 3.418865823 | 22.78098243 | 1.82E-06 | 4.90E-05 | 4.440932708  | 4.227146839  | 2.439516168  | 1.348272594  | 2.247064062  |
| ENSG00000122223 | LTF           | lactotransferrin [Source:HGNC Symbol;Acc:6720]                                                                                                | -4.56963865  | 6.6654719   | 22.76796936 | 1.83E-06 | 4.92E-05 | 7.999657807  | 4.846103827  | 0.505333341  | 3.306279995  | 7.723535322  |
| ENSG00000100473 | COCH          | cochlin [Source:HGNC Symbol;Acc:2180]                                                                                                         | -1.773809302 | 4.246339016 | 22.75793321 | 1.84E-06 | 4.94E-05 | 5.305852844  | 4.975312216  | 3.154531226  | 2.974805722  | 2.765955603  |
| ENSG00000186567 | CEACAM19      | carcinoembryonic antigen-related cell adhesion molecule 19 [Source:HGNC Symbol;Acc:31951]                                                     | 3.371723877  | 1.227233051 | 22.72101314 | 1.87E-06 | 5.03E-05 | -0.942926472 | -0.112176905 | 0.125863448  | 2.580193821  | 1.531661491  |
| ENSG00000250138 | RP11-848G14.5 |                                                                                                                                               | 2.803479628  | 4.704199763 | 22.69486022 | 1.90E-06 | 5.09E-05 | 2.537059301  | 2.79012399   | 3.679326777  | 6.0913346    | 5.183161802  |
| ENSG00000175445 | LPL           | lipoprotein lipase [Source:HGNC Symbol;Acc:6677]                                                                                              | -2.610595599 | 2.378331791 | 22.66236867 | 1.93E-06 | 5.17E-05 | 3.890900236  | 2.975070752  | -0.82139248  | 0.335717742  | 0.223773082  |
| ENSG00000162747 | FCGR3B        | Fc fragment of IgG, low affinity IIIb, receptor (CD16b) [Source:HGNC Symbol;Acc:3620]                                                         | 2.483380931  | 5.254498623 | 22.65088982 | 1.94E-06 | 5.19E-05 | 3.54006658   | 3.29881546   | 4.485248201  | 6.391456188  | 5.972219808  |
| ENSG00000108821 | COL1A1        | collagen, type I, alpha 1 [Source:HGNC Symbol;Acc:2197]                                                                                       | -3.204610406 | 1.316466169 | 22.64113818 | 1.95E-06 | 5.21E-05 | 2.256798335  | 2.772072928  | -2.539967122 | -3.888428289 | -2.060109799 |
| ENSG00000111247 | RAD51AP1      | RAD51 associated protein 1 [Source:HGNC Symbol;Acc:16956]                                                                                     | -2.182059342 | 2.492121025 | 22.6031384  | 1.99E-06 | 5.31E-05 | 3.245913199  | 3.225538486  | 0.168628767  | 0.229488395  | 2.74471156   |
| ENSG00000203813 | HIST1H3H      | histone cluster 1, H3h [Source:HGNC Symbol;Acc:4775]                                                                                          | 2.533379049  | 2.301819326 | 22.55285735 | 2.04E-06 | 5.44E-05 | 1.084982398  | 1.07079906   | 2.292585253  | 3.419322554  | 2.185328638  |
| ENSG00000140090 | SLC24A4       | solute carrier family 24 (sodium/potassium/calcium exchanger), member 4 [Source:HGNC Symbol;Acc:10978]                                        | 1.955594157  | 5.236080168 | 22.52103728 | 2.08E-06 | 5.52E-05 | 3.609842318  | 4.231556919  | 5.149585589  | 6.323150454  | 5.37856212   |
| ENSG00000181908 | AP003774.4    | HCG1652096, isoform CRA_a; Uncharacterized protein; cDNA FLJ37045 fis, clone BRACE2012185 [Source:UniProtKB/TrEMBL;Acc:Q8N9J4]                | 2.855385977  | 1.04229536  | 22.5050633  | 2.10E-06 | 5.56E-05 | -0.625332215 | -0.523165112 | 0.721814282  | 1.981700954  | 1.627625634  |
| ENSG00000110987 | BCL7A         | B-cell CLL/lymphoma 7A [Source:HGNC Symbol;Acc:1004]                                                                                          | -1.875806029 | 4.392182599 | 22.49539398 | 2.11E-06 | 5.58E-05 | 5.042641743  | 4.652487188  | 3.089249033  | 2.106994346  | 5.079506237  |
| ENSG00000090104 | RGS1          | regulator of G-protein signaling 1 [Source:HGNC Symbol;Acc:9991]                                                                              | -2.611373449 | 5.137281833 | 22.48410053 | 2.12E-06 | 5.60E-05 | 6.754766009  | 5.129775555  | 3.196467253  | 3.874800997  | 3.146787158  |
| ENSG00000253957 | IIGHV3-22     | immunoglobulin heavy variable 3-22 (pseudogene) [Source:HGNC Symbol;Acc:5587]                                                                 | -3.29747528  | 1.112934432 | 22.47361724 | 2.13E-06 | 5.62E-05 | 2.651774847  | 1.355744383  | -1.886652327 | -3.360122781 | 0.415212929  |
| ENSG00000249138 | RP11-701P16.1 |                                                                                                                                               | 4.275801005  | 0.165228061 | 22.40023122 | 2.21E-06 | 5.83E-05 | -1.921450438 | -2.262017103 | -1.886652327 | 1.692827451  | 0.415212929  |
| ENSG00000074696 | PTPLAD1       | protein tyrosine phosphatase-like A domain containing 1 [Source:HGNC Symbol;Acc:24175]                                                        | -1.549984799 | 5.375308273 | 22.39074714 | 2.22E-06 | 5.85E-05 | 6.029091381  | 6.111185334  | 4.57938316   | 4.183001653  | 4.941611722  |
| ENSG00000175216 | CKAP5         | cytoskeleton associated protein 5 [Source:HGNC Symbol;Acc:28959]                                                                              | -1.601285603 | 6.264731902 | 22.354003   | 2.27E-06 | 5.96E-05 | 6.645948858  | 6.979311433  | 5.525661302  | 4.872947848  | 6.365727161  |
| ENSG00000136010 | ALDH1L2       | aldehyde dehydrogenase 1 family, member L2 [Source:HGNC Symbol;Acc:26777]                                                                     | -2.486207033 | 2.003061417 | 22.3373246  | 2.29E-06 | 6.00E-05 | 3.201403963  | 2.69752161   | -0.66302287  | -0.7248947   | 1.498200525  |
| ENSG00000138821 | SLC39A8       | solute carrier family 39 (zinc transporter), member 8 [Source:HGNC Symbol;Acc:20862]                                                          | -1.785733587 | 5.701625697 | 22.28381494 | 2.35E-06 | 6.16E-05 | 6.476787366  | 6.405657863  | 5.158895582  | 4.038427289  | 5.083742254  |
| ENSG00000162998 | FRZB          | frizzled-related protein [Source:HGNC Symbol;Acc:3959]                                                                                        | -8.745775965 | 0.317604185 | 22.22970684 | 2.42E-06 | 6.31E-05 | 1.752861822  | 1.220295226  | -7.002070102 | -7.002070102 | -2.274700861 |
| ENSG00000151090 | THRB          | thyroid hormone receptor, beta [Source:HGNC Symbol;Acc:11799]                                                                                 | -2.552787057 | 1.855193883 | 22.23158668 | 2.42E-06 | 6.31E-05 | 3.08644716   | 2.48494876   | -0.10933503  | -1.042179808 | 1.198257616  |

|                 |               |                                                                                                                                                               |              |              |             |          |          |              |              |              |              |              |
|-----------------|---------------|---------------------------------------------------------------------------------------------------------------------------------------------------------------|--------------|--------------|-------------|----------|----------|--------------|--------------|--------------|--------------|--------------|
| ENSG00000189060 | H1FO          | H1 histone family, member 0 [Source:HGNC Symbol;Acc:4714]                                                                                                     | -1.677813385 | 6.465541572  | 22.23359054 | 2.41E-06 | 6.31E-05 | 6.651014597  | 6.921117846  | 4.784053235  | 5.39517774   | 7.231463478  |
| ENSG00000135338 | LCA5          | Leber congenital amaurosis 5 [Source:HGNC Symbol;Acc:31923]                                                                                                   | -2.68180137  | 1.491678138  | 22.21905164 | 2.43E-06 | 6.32E-05 | 2.629549878  | 2.401300588  | -1.315629595 | -2.0191864   | 0.706443614  |
| ENSG00000154920 | EME1          | essential meiotic structure-specific endonuclease 1 [Source:HGNC Symbol;Acc:24965]                                                                            | -2.350011069 | 1.968723778  | 22.21994416 | 2.43E-06 | 6.32E-05 | 2.591730062  | 2.759912177  | -0.271377577 | -0.7248947   | 2.334979851  |
| ENSG00000267288 | RP13-890H12.2 |                                                                                                                                                               | 2.763976346  | 0.068928942  | 22.21906591 | 2.43E-06 | 6.32E-05 | -1.132483902 | -1.394066322 | 0.125863448  | 0.61425099   | 0.615745481  |
| ENSG00000111886 | GABRR2        | gamma-aminobutyric acid (GABA) A receptor, rho 2 [Source:HGNC Symbol;Acc:4091]                                                                                | 2.871862     | 0.54772493   | 22.19840564 | 2.46E-06 | 6.38E-05 | -1.034594152 | -0.713501401 | -0.215316613 | 1.242998101  | 1.446507348  |
| ENSG00000211672 | IGLV4-3       | immunoglobulin lambda variable 4-3 [Source:HGNC Symbol;Acc:5919]                                                                                              | -3.689532627 | 0.894379886  | 22.17775864 | 2.49E-06 | 6.44E-05 | 2.636996308  | 1.147482679  | -2.539967122 | -4.730697034 | -1.42520211  |
| ENSG00000261253 | AC137932.6    |                                                                                                                                                               | 2.978782923  | 0.535829424  | 22.16544645 | 2.50E-06 | 6.47E-05 | -1.237502295 | -0.464918547 | 0.538319988  | 1.75796486   | -0.045536284 |
| ENSG00000253616 | RP11-875O11.3 |                                                                                                                                                               | 2.982861786  | 0.177717189  | 22.16269106 | 2.50E-06 | 6.47E-05 | -1.132483902 | -1.191564836 | 0.036330944  | 1.348272594  | -0.147769603 |
| ENSG00000257698 | RP11-620J15.3 |                                                                                                                                                               | -2.150092686 | 3.34305507   | 22.14752913 | 2.52E-06 | 6.51E-05 | 4.35097416   | 3.873554127  | 1.245796404  | 1.959718487  | 3.189342067  |
| ENSG00000255197 | RP11-750H9.5  |                                                                                                                                                               | 2.176202504  | 5.103853185  | 22.14091488 | 2.53E-06 | 6.52E-05 | 3.241034999  | 4.121805905  | 4.91854721   | 6.191406778  | 5.37395741   |
| ENSG00000154928 | EPHB1         | EPH receptor B1 [Source:HGNC Symbol;Acc:3392]                                                                                                                 | 3.672602641  | 0.996912807  | 22.12748048 | 2.55E-06 | 6.56E-05 | -2.322346157 | -2.726009782 | -2.845623393 | 1.109604583  | 2.83459139   |
| ENSG00000165891 | E2F7          | E2F transcription factor 7 [Source:HGNC Symbol;Acc:23820]                                                                                                     | -2.489646703 | 2.088180261  | 22.0629742  | 2.64E-06 | 6.77E-05 | 2.512979527  | 3.115310691  | -1.721358966 | -0.589083246 | 2.487707366  |
| ENSG00000152990 | GPR125        | G protein-coupled receptor 125 [Source:HGNC Symbol;Acc:13839]                                                                                                 | -2.126570662 | 2.66552168   | 22.05742764 | 2.65E-06 | 6.78E-05 | 3.579246723  | 3.229953478  | 0.959559782  | 0.335717742  | 2.786891356  |
| ENSG00000254326 | IGHV7-27      | immunoglobulin heavy variable 7-27 (pseudogene) [Source:HGNC Symbol;Acc:5663]                                                                                 | -8.652219871 | 0.163474557  | 22.04986687 | 2.66E-06 | 6.80E-05 | 1.832851647  | 0.583576386  | -7.002070102 | -7.002070102 | -2.060109799 |
| ENSG00000115590 | IL1R2         | interleukin 1 receptor, type II [Source:HGNC Symbol;Acc:5994]                                                                                                 | 3.202755092  | 2.517260659  | 22.02452882 | 2.69E-06 | 6.88E-05 | 0.848890306  | 0.664086661  | 1.644577544  | 3.985013877  | 2.578558393  |
| ENSG0000015413  | DPEP1         | dipeptidase 1 (renal) [Source:HGNC Symbol;Acc:3002]                                                                                                           | -8.05842773  | -0.302520825 | 21.94606621 | 2.80E-06 | 7.16E-05 | 1.040754067  | 0.095631612  | -7.002070102 | -7.002070102 | -0.649489103 |
| ENSG00000177335 | C8orf31       | chromosome 8 open reading frame 31 [Source:HGNC Symbol;Acc:26731]                                                                                             | 2.961351461  | 0.258998263  | 21.92078648 | 2.84E-06 | 7.23E-05 | -1.034594152 | -1.014020025 | -0.390491059 | 1.27894994   | 0.615745481  |
| ENSG00000272555 | RP11-459I19.1 |                                                                                                                                                               | 3.831245397  | -0.158649023 | 21.92190021 | 2.84E-06 | 7.23E-05 | -1.921450438 | -2.076136033 | -1.315629595 | 1.109604583  | 0.182236344  |
| ENSG00000127507 | EMR2          | egf-like module containing, mucin-like, hormone receptor-like 2 [Source:HGNC Symbol;Acc:3337]                                                                 | 2.177653085  | 6.695187727  | 21.89455957 | 2.88E-06 | 7.32E-05 | 4.699264367  | 5.484112873  | 6.34330282   | 7.777445234  | 7.194727388  |
| ENSG00000182492 | BGN           | biglycan [Source:HGNC Symbol;Acc:1044]                                                                                                                        | -8.277677254 | -0.128195601 | 21.89124647 | 2.89E-06 | 7.32E-05 | 1.210071084  | 0.740340508  | -7.002070102 | -7.002070102 | -1.87334355  |
| ENSG00000242472 | IGHJ5         | immunoglobulin heavy joining 5 [Source:HGNC Symbol;Acc:5539]                                                                                                  | -1.87450445  | 3.413751884  | 21.88253128 | 2.90E-06 | 7.34E-05 | 4.474571151  | 3.516835107  | 1.613958159  | 3.275467173  | 2.71589062   |
| ENSG00000153721 | CNKSR3        | CNKSR family member 3 [Source:HGNC Symbol;Acc:23034]                                                                                                          | -2.757393312 | 1.66652282   | 21.80555822 | 3.02E-06 | 7.63E-05 | 2.811663962  | 2.492318033  | -3.233942493 | -1.042179808 | 1.218946104  |
| ENSG00000213160 | KLHL23        | kelch-like family member 23 [Source:HGNC Symbol;Acc:27506]                                                                                                    | -2.268472097 | 2.209750512  | 21.79063088 | 3.04E-06 | 7.68E-05 | 3.181172573  | 2.92693583   | 0.081791624  | -0.406691783 | 2.120832889  |
| ENSG00000177989 | ODF3B         | outer dense fiber of sperm tails 3B [Source:HGNC Symbol;Acc:34388]                                                                                            | 2.162374805  | 5.248786727  | 21.77739196 | 3.06E-06 | 7.72E-05 | 3.30320015   | 3.830594178  | 4.9843626    | 6.384253659  | 5.659636098  |
| ENSG00000244682 | FCGR2C        | Fc fragment of IgG, low affinity IIc, receptor for (CD32) (gene/pseudogene) [Source:HGNC Symbol;Acc:15626]                                                    | 1.784419231  | 5.062968694  | 21.760766   | 3.09E-06 | 7.78E-05 | 3.890900236  | 4.255574294  | 5.207131666  | 5.924743627  | 5.139065217  |
| ENSG00000166664 | CHRFAM7A      | CHRNA7 (cholinergic receptor, nicotinic, alpha 7, exons 5-10) and FAM7A (family with sequence similarity 7A, exons A-E) fusion [Source:HGNC Symbol;Acc:15781] | 3.490381901  | -0.583861443 | 21.73345332 | 3.13E-06 | 7.88E-05 | -2.322346157 | -2.076136033 | -3.233942493 | 0.466186565  | 0.182236344  |
| ENSG00000119457 | SLC46A2       | solute carrier family 46, member 2 [Source:HGNC Symbol;Acc:16055]                                                                                             | 2.611751637  | 4.119300123  | 21.7161737  | 3.16E-06 | 7.94E-05 | 1.89628059   | 2.729054134  | 3.547813796  | 5.341999652  | 4.585134766  |
| ENSG0000046604  | DSG2          | desmoglein 2 [Source:HGNC Symbol;Acc:3049]                                                                                                                    | -2.454774064 | 2.130582511  | 21.64270201 | 3.28E-06 | 8.24E-05 | 3.18625708   | 2.932364153  | -1.721358966 | -0.053815412 | 1.84284836   |
| ENSG00000259749 | CTD-2022H16.2 |                                                                                                                                                               | -3.702902176 | 0.387142403  | 21.62350317 | 3.32E-06 | 8.31E-05 | 1.32517403   | 1.403429499  | -3.766908349 | -4.730697034 | -0.045536284 |
| ENSG00000164125 | FAM198B       | family with sequence similarity 198, member B [Source:HGNC Symbol;Acc:25312]                                                                                  | 2.023095562  | 6.58857071   | 21.61502722 | 3.33E-06 | 8.33E-05 | 4.332747819  | 5.281037529  | 6.160725479  | 7.071849427  | 7.753978556  |
| ENSG00000109674 | NEIL3         | nei endonuclease VIII-like 3 (E. coli) [Source:HGNC Symbol;Acc:24573]                                                                                         | -2.566378474 | 1.809426445  | 21.57270945 | 3.41E-06 | 8.48E-05 | 2.673662624  | 2.577932504  | -1.886652327 | -1.336401299 | 2.076176073  |
| ENSG00000235534 | FECHP1        | ferrochelatase pseudogene 1 [Source:HGNC Symbol;Acc:3648]                                                                                                     | -2.129334111 | 2.348737474  | 21.57470653 | 3.40E-06 | 8.48E-05 | 3.160653431  | 3.243117961  | 0.805492218  | 0.114810932  | 1.97033799   |
| ENSG00000197451 | HNRNPAB       | heterogeneous nuclear ribonucleoprotein A/B [Source:HGNC Symbol;Acc:5034]                                                                                     | -1.556196089 | 6.327738668  | 21.57487925 | 3.40E-06 | 8.48E-05 | 7.001505717  | 6.8594097    | 5.313383893  | 5.64720597   | 6.070117803  |
| ENSG00000171611 | PTCRA         | pre T-cell antigen receptor alpha [Source:HGNC Symbol;Acc:21290]                                                                                              | 2.715699224  | 2.491811313  | 21.56656298 | 3.42E-06 | 8.50E-05 | 0.534915169  | 1.109650305  | 2.1289755    | 3.710101675  | 2.758908956  |
| ENSG00000265625 | RP11-68I3.11  |                                                                                                                                                               | 4.033698773  | 1.090032806  | 21.55119867 | 3.45E-06 | 8.55E-05 | -1.237502295 | -0.782968247 | -0.215316613 | 2.830854872  | 0.415212929  |

|                 |               |                                                                                                                        |              |              |             |          |             |              |              |              |              |              |
|-----------------|---------------|------------------------------------------------------------------------------------------------------------------------|--------------|--------------|-------------|----------|-------------|--------------|--------------|--------------|--------------|--------------|
| ENSG00000166928 | MS4A14        | membrane-spanning 4-domains, subfamily A, member 14 [Source:HGNC Symbol;Acc:30706]                                     | 2.650473215  | 3.965298816  | 21.52955757 | 3.48E-06 | 8.64E-05    | 1.883815937  | 2.905015959  | 3.686701825  | 5.295588046  | 3.853782901  |
| ENSG00000143942 | CHAC2         | ChaC, cation transport regulator homolog 2 (E. coli) [Source:HGNC Symbol;Acc:32363]                                    | -2.359917252 | 2.029894866  | 21.50148808 | 3.54E-06 | 8.75E-05    | 3.042264405  | 2.825562359  | 0.505333341  | -0.956081001 | 1.515028015  |
| ENSG00000165507 | C10orf10      | chromosome 10 open reading frame 10 [Source:HGNC Symbol;Acc:23355]                                                     | -2.673289708 | 1.506536675  | 21.4773925  | 3.58E-06 | 8.85E-05    | 2.837748047  | 2.126114598  | -1.438615935 | -1.449512048 | 0.735452007  |
| ENSG00000100079 | LGALS2        | lectin, galactoside-binding, soluble, 2 [Source:HGNC Symbol;Acc:6562]                                                  | 1.878742357  | 5.099249727  | 21.47221043 | 3.59E-06 | 8.86E-05    | 3.160653431  | 4.16855421   | 5.170777967  | 5.678666986  | 5.832371273  |
| ENSG00000114268 | PFKFB4        | 6-phosphofructo-2-kinase/fructose-2,6-biphosphatase 4 [Source:HGNC Symbol;Acc:8875]                                    | 1.864228074  | 5.077945394  | 21.43714258 | 3.66E-06 | 9.01E-05    | 3.621150429  | 4.114661149  | 4.969322447  | 5.937453053  | 5.535242871  |
| ENSG00000086200 | IPO11         | importin 11 [Source:HGNC Symbol;Acc:20628]                                                                             | -1.615331547 | 4.320633551  | 21.41080906 | 3.71E-06 | 9.11E-05    | 5.046840739  | 4.998786624  | 3.324906709  | 3.20246409   | 3.940421563  |
| ENSG00000154856 | APCDD1        | adenomatosis polyposis coli down-regulated 1 [Source:HGNC Symbol;Acc:15718]                                            | 2.813860538  | 1.30553667   | 21.41193082 | 3.70E-06 | 9.11E-05    | -0.698419327 | -0.025429826 | 0.28980717   | 1.856429106  | 2.504656975  |
| ENSG00000235036 | RP5-1099D15.1 |                                                                                                                        | -1.775796363 | 3.732771064  | 21.403102   | 3.72E-06 | 9.14E-05    | 4.507443104  | 4.550279288  | 2.665349954  | 2.156150191  | 3.199787516  |
| ENSG00000048462 | TNFRSF17      | tumor necrosis factor receptor superfamily, member 17 [Source:HGNC Symbol;Acc:11913]                                   | -2.413559302 | 2.04477967   | 21.38919145 | 3.75E-06 | 9.19E-05    | 3.260449604  | 2.46261236   | -0.010608983 | -0.244792505 | 1.774613685  |
| ENSG00000148053 | NTRK2         | neurotrophic tyrosine kinase, receptor, type 2 [Source:HGNC Symbol;Acc:8032]                                           | -3.222321716 | 1.045411402  | 21.3576162  | 3.81E-06 | 9.33E-05    | 2.688072143  | 1.634124584  | -2.287883461 | -3.360122781 | -2.526883755 |
| ENSG00000108950 | FAM20A        | family with sequence similarity 20, member A [Source:HGNC Symbol;Acc:23015]                                            | 2.481536185  | 2.559989892  | 21.31971456 | 3.89E-06 | 9.50E-05    | -0.14487434  | 0.376157587  | 0.778135316  | 2.106994346  | 4.398236712  |
| ENSG00000176208 | ATAD5         | ATPase family, AAA domain containing 5 [Source:HGNC Symbol;Acc:25752]                                                  | -1.700635018 | 4.064615813  | 21.27068087 | 3.99E-06 | 9.72E-05    | 4.741326197  | 4.749469165  | 2.847469331  | 2.580193821  | 4.048396296  |
| ENSG00000131355 | EMR3          | egf-like module containing, mucin-like, hormone receptor-like 3 [Source:HGNC Symbol;Acc:23647]                         | 2.031143266  | 4.031703171  | 21.27327903 | 3.98E-06 | 9.72E-05    | 2.622064814  | 3.315529363  | 4.249129201  | 5.141787525  | 3.465217709  |
| ENSG00000106462 | EZH2          | enhancer of zeste homolog 2 (Drosophila) [Source:HGNC Symbol;Acc:3527]                                                 | -1.569105273 | 4.793542142  | 21.26256499 | 4.00E-06 | 9.75E-05    | 5.454436398  | 5.339408959  | 3.664462604  | 3.572025663  | 4.881241457  |
| ENSG00000029993 | HMGB3         | high mobility group box 3 [Source:HGNC Symbol;Acc:5004]                                                                | -2.084558712 | 3.449716037  | 21.22158975 | 4.09E-06 | 9.95E-05    | 4.318925344  | 4.207132934  | 1.184602189  | 2.231473747  | 3.157544141  |
| ENSG00000101868 | POLA1         | polymerase (DNA directed), alpha 1, catalytic subunit [Source:HGNC Symbol;Acc:9173]                                    | -1.603056934 | 4.703783711  | 21.19880118 | 4.14E-06 | 0.000100389 | 5.296478906  | 5.36170963   | 3.91735282   | 3.275467173  | 4.632168294  |
| ENSG00000146070 | PLA2G7        | phospholipase A2, group VII (platelet-activating factor acetylhydrolase, plasma) [Source:HGNC Symbol;Acc:9040]         | 2.384057507  | 3.759783522  | 21.20080869 | 4.14E-06 | 0.000100389 | 1.883815937  | 2.66528446   | 3.531522919  | 4.743838665  | 4.252828525  |
| ENSG00000094963 | FMO2          | flavin containing monooxygenase 2 (non-functional) [Source:HGNC Symbol;Acc:3770]                                       | -4.693784099 | 0.656070407  | 21.18333614 | 4.17E-06 | 0.000100924 | 2.060341768  | 1.634124584  | -4.621297774 | -7.002070102 | -2.060109799 |
| ENSG00000124469 | CEACAM8       | carcinoembryonic antigen-related cell adhesion molecule 8 [Source:HGNC Symbol;Acc:1820]                                | -3.193631032 | 3.738387664  | 21.18399892 | 4.17E-06 | 0.000100924 | 4.470408989  | 2.424598913  | -2.287883461 | 0.369457657  | 5.22977811   |
| ENSG00000123374 | CDK2          | cyclin-dependent kinase 2 [Source:HGNC Symbol;Acc:1771]                                                                | -1.488872049 | 5.284843861  | 21.14267332 | 4.26E-06 | 0.000102946 | 5.865188795  | 5.843028919  | 4.415940919  | 4.41678084   | 5.179208255  |
| ENSG00000243063 | IGKV3-7       | immunoglobulin kappa variable 3-7 (non-functional) [Source:HGNC Symbol;Acc:5821]                                       | -3.319491573 | 0.648178593  | 21.10273368 | 4.35E-06 | 0.00010497  | 2.026722384  | 1.202433699  | -2.845623393 | -3.888428289 | -0.045536284 |
| ENSG00000173218 | VANGL1        | VANGL planar cell polarity protein 1 [Source:HGNC Symbol;Acc:15512]                                                    | -1.73705853  | 4.019366634  | 21.08840297 | 4.39E-06 | 0.000105613 | 4.744776617  | 4.834553798  | 2.635172888  | 2.848906753  | 3.585603588  |
| ENSG00000119681 | LTBP2         | latent transforming growth factor beta binding protein 2 [Source:HGNC Symbol;Acc:6715]                                 | -2.094341839 | 2.721151096  | 21.07616655 | 4.41E-06 | 0.000106144 | 3.820704546  | 3.502308971  | 1.397324829  | 0.497040107  | 1.658245749  |
| ENSG00000229762 | RP11-419M24.1 |                                                                                                                        | -2.615425195 | 1.371388047  | 21.07130065 | 4.43E-06 | 0.000106268 | 2.304339895  | 2.385556684  | -2.073364206 | -0.956081001 | 0.763888603  |
| ENSG00000204577 | LILRB3        | leukocyte immunoglobulin-like receptor, subfamily B (with TM and ITIM domains), member 3 [Source:HGNC Symbol;Acc:6607] | 2.256173997  | 4.725779423  | 21.06228599 | 4.45E-06 | 0.000106623 | 2.504862786  | 3.43888722   | 4.14321713   | 5.544797556  | 5.677496869  |
| ENSG00000068078 | FGFR3         | fibroblast growth factor receptor 3 [Source:HGNC Symbol;Acc:3690]                                                      | -3.993906339 | 0.710261491  | 21.02295676 | 4.54E-06 | 0.000108555 | 1.562650064  | 1.933837788  | -7.002070102 | -3.888428289 | 0.002986071  |
| ENSG00000224397 | RP11-290F20.3 |                                                                                                                        | 1.833872233  | 5.661260078  | 21.02265062 | 4.54E-06 | 0.000108555 | 4.190707534  | 4.924464118  | 5.804334409  | 6.697360094  | 5.474166643  |
| ENSG00000240563 | L1TD1         | LINE-1 type transposase domain containing 1 [Source:HGNC Symbol;Acc:25595]                                             | 2.90893603   | -0.038238859 | 20.93801998 | 4.74E-06 | 0.000113304 | -1.921450438 | -0.464918547 | 0.081791624  | 0.894716898  | -0.57637152  |
| ENSG00000177483 | RBM44         | RNA binding motif protein 44 [Source:HGNC Symbol;Acc:24756]                                                            | 2.590469427  | 1.282174343  | 20.92762097 | 4.77E-06 | 0.000113766 | 0.133035942  | 0.207316148  | 1.205290011  | 2.096958951  | 1.612068369  |

|                 |                |                                                                                                       |              |             |             |          |             |              |              |              |              |              |
|-----------------|----------------|-------------------------------------------------------------------------------------------------------|--------------|-------------|-------------|----------|-------------|--------------|--------------|--------------|--------------|--------------|
| ENSG00000173338 | KCNK7          | potassium channel, subfamily K, member 7 [Source:HGNC Symbol;Acc:6282]                                | 3.35815462   | 1.317397854 | 20.90996323 | 4.81E-06 | 0.000114664 | -0.489407866 | -0.523165112 | 0.328039018  | 2.872629851  | 1.11240278   |
| ENSG00000069482 | GAL            | galanin/GMAP prepropeptide [Source:HGNC Symbol;Acc:4114]                                              | -8.614328423 | 0.20952839  | 20.90338586 | 4.83E-06 | 0.000114902 | 1.957037891  | 0.637745977  | -7.002070102 | -7.002070102 | -4.610216385 |
| ENSG00000251442 | LINC01094      | long intergenic non-protein coding RNA 1094 [Source:HGNC Symbol;Acc:49219]                            | 3.033014931  | 1.254297654 | 20.89915223 | 4.84E-06 | 0.000115    | -1.47369337  | 0.277241192  | 0.884581662  | 2.045707388  | 2.041752268  |
| ENSG00000225217 | HSPA7          | heat shock 70kDa protein 7 (HSP70B) [Source:HGNC Symbol;Acc:5240]                                     | 1.834503913  | 4.478302145 | 20.86021353 | 4.94E-06 | 0.000117204 | 3.499792625  | 3.446494941  | 4.52898614   | 5.410452458  | 4.544733818  |
| ENSG00000197146 | AL133458.1     |                                                                                                       | 1.544275871  | 4.902521461 | 20.83901482 | 5.00E-06 | 0.000118188 | 4.069366531  | 4.339686916  | 5.407889352  | 5.725829945  | 4.074172926  |
| ENSG00000264868 | CTB-167B5.2    |                                                                                                       | 2.638374356  | 2.25290895  | 20.84017195 | 4.99E-06 | 0.000118188 | -0.196880952 | -0.025429826 | 1.142314722  | 2.444318394  | 3.82032647   |
| ENSG00000148218 | ALAD           | aminolevulinatase dehydratase [Source:HGNC Symbol;Acc:395]                                            | -1.547232701 | 6.858948841 | 20.819348   | 5.05E-06 | 0.000119248 | 7.328239757  | 7.640949063  | 6.091568225  | 5.920482148  | 6.508059478  |
| ENSG00000140284 | SLC27A2        | solute carrier family 27 (fatty acid transporter), member 2 [Source:HGNC Symbol;Acc:10996]            | -2.187222778 | 2.636776956 | 20.79821789 | 5.10E-06 | 0.000120408 | 3.613621545  | 3.435068262  | -0.161352853 | 0.894716898  | 2.31590077   |
| ENSG00000187554 | TLR5           | toll-like receptor 5 [Source:HGNC Symbol;Acc:11851]                                                   | 1.989323232  | 4.512802358 | 20.77319567 | 5.17E-06 | 0.000121828 | 2.5449974    | 3.450283811  | 4.263996407  | 5.108457793  | 5.440430209  |
| ENSG00000160789 | LMNA           | lamin A/C [Source:HGNC Symbol;Acc:6636]                                                               | -1.605603615 | 5.778167561 | 20.7586075  | 5.21E-06 | 0.000122595 | 6.584693598  | 6.409068754  | 4.618470392  | 5.065361115  | 5.132264757  |
| ENSG00000156206 | C15orf26       | chromosome 15 open reading frame 26 [Source:HGNC Symbol;Acc:26782]                                    | 2.838651547  | 0.495992423 | 20.73220729 | 5.28E-06 | 0.000124131 | -1.756270337 | -0.157588231 | 0.328039018  | 1.242998101  | 0.973207307  |
| ENSG00000198157 | HMGN5          | high mobility group nucleosome binding domain 5 [Source:HGNC Symbol;Acc:8013]                         | -2.061342829 | 2.552132043 | 20.72749373 | 5.30E-06 | 0.00012427  | 3.575376245  | 3.29881546   | 0.778135316  | 0.642123966  | 1.994537666  |
| ENSG00000131398 | KCNK3          | potassium voltage-gated channel, Shaw-related subfamily, member 3 [Source:HGNC Symbol;Acc:6235]       | 2.380351016  | 3.649085721 | 20.71150905 | 5.34E-06 | 0.000125145 | 1.89628059   | 2.598565174  | 3.4384784    | 4.823595141  | 3.754539027  |
| ENSG00000233392 | AC104809.4     |                                                                                                       | 1.95496231   | 4.36865702  | 20.69817285 | 5.38E-06 | 0.000125851 | 2.622064814  | 3.909778597  | 5.093815094  | 5.240813742  | 3.300281982  |
| ENSG00000148346 | LCN2           | lipocalin 2 [Source:HGNC Symbol;Acc:6526]                                                             | -3.179043665 | 5.273477477 | 20.67772063 | 5.43E-06 | 0.000127033 | 6.137408525  | 3.69346042   | 1.342349735  | 2.615771827  | 6.661415443  |
| ENSG00000006042 | TMEM98         | transmembrane protein 98 [Source:HGNC Symbol;Acc:24529]                                               | -2.777154867 | 1.282814421 | 20.65801904 | 5.49E-06 | 0.000128177 | 2.394966414  | 2.439924693  | -3.766908349 | -1.449512048 | -0.506781561 |
| ENSG00000128578 | STRIP2         | striatin interacting protein 2 [Source:HGNC Symbol;Acc:22209]                                         | -2.126769457 | 2.299165242 | 20.64735536 | 5.52E-06 | 0.000128721 | 2.979215452  | 3.43888722   | 0.036330944  | 0.335717742  | 1.702990823  |
| ENSG00000101162 | TUBB1          | tubulin, beta 1 class VI [Source:HGNC Symbol;Acc:16257]                                               | 2.447850692  | 7.576415893 | 20.64086313 | 5.54E-06 | 0.000128987 | 5.226632795  | 6.238274777  | 7.324739942  | 8.808404155  | 7.860890036  |
| ENSG00000144647 | POMGNT2        | protein O-linked mannose N-acetylglucosaminyltransferase 2 (beta 1,4-) [Source:HGNC Symbol;Acc:25902] | -1.737439271 | 3.720641836 | 20.63227181 | 5.57E-06 | 0.000129396 | 4.474571151  | 4.612468678  | 2.6198443    | 2.231473747  | 3.011029232  |
| ENSG00000233901 | RP11-65J3.1    |                                                                                                       | 2.87526322   | 2.101585518 | 20.62329624 | 5.59E-06 | 0.000129832 | 0.000762307  | 0.98980953   | 1.450281721  | 3.178871708  | 2.679035416  |
| ENSG00000237476 | Xbac-B135H6.15 |                                                                                                       | 2.589035702  | 0.765110884 | 20.60078192 | 5.66E-06 | 0.000131194 | -0.625332215 | -0.252938016 | 0.632982468  | 1.582074621  | 1.134350211  |
| ENSG00000213557 | RP11-240E2.2   |                                                                                                       | 3.05019282   | 0.926119421 | 20.58695589 | 5.70E-06 | 0.000131971 | -1.034594152 | -0.025429826 | 0.934997507  | 2.294302704  | -0.147769603 |
| ENSG00000185128 | TBC1D3F        | TBC1 domain family, member 3F [Source:HGNC Symbol;Acc:18257]                                          | 2.662801701  | 0.061811748 | 20.56471007 | 5.76E-06 | 0.000133337 | -1.237502295 | -0.782968247 | -0.271377577 | 0.722650538  | 0.551948963  |
| ENSG00000213551 | DNAJC9         | Dnaj (Hsp40) homolog, subfamily C, member 9 [Source:HGNC Symbol;Acc:19123]                            | -1.550455463 | 5.14265895  | 20.54139944 | 5.84E-06 | 0.000134793 | 5.852451395  | 5.768355894  | 4.386805333  | 3.765005219  | 4.884482612  |
| ENSG00000176619 | LMNB2          | lamin B2 [Source:HGNC Symbol;Acc:6638]                                                                | -1.44867446  | 5.917569085 | 20.51613346 | 5.91E-06 | 0.000136405 | 6.43574878   | 6.523636984  | 5.145577126  | 4.73415894   | 5.939092537  |
| ENSG00000130560 | UBAC1          | UBA domain containing 1 [Source:HGNC Symbol;Acc:30221]                                                | -1.49277265  | 6.320906032 | 20.47177313 | 6.05E-06 | 0.00013942  | 6.892182271  | 7.070139413  | 5.40900449   | 5.592899069  | 5.794106566  |
| ENSG00000205213 | LGR4           | leucine-rich repeat containing G protein-coupled receptor 4 [Source:HGNC Symbol;Acc:13299]            | -2.014824232 | 2.690129009 | 20.45015724 | 6.12E-06 | 0.000140819 | 3.420029142  | 3.69346042   | 0.6928072    | 1.0274492    | 2.216526545  |
| ENSG00000123131 | PRDX4          | peroxiredoxin 4 [Source:HGNC Symbol;Acc:17169]                                                        | -1.716366774 | 4.730386072 | 20.44195045 | 6.15E-06 | 0.000141239 | 5.73852217   | 5.086609179  | 3.622778389  | 3.403124214  | 4.471189828  |
| ENSG00000147394 | ZNF185         | zinc finger protein 185 (LIM domain) [Source:HGNC Symbol;Acc:12976]                                   | 2.172345305  | 5.966811048 | 20.43919462 | 6.16E-06 | 0.000141257 | 4.190707534  | 4.808223102  | 5.511195355  | 7.199266765  | 6.201316827  |
| ENSG00000163918 | RFC4           | replication factor C (activator 1) 4, 37kDa [Source:HGNC Symbol;Acc:9972]                             | -1.616077268 | 4.449264623 | 20.4270218  | 6.19E-06 | 0.000141973 | 5.151933519  | 5.123856905  | 3.615068323  | 2.806428868  | 4.267798636  |
| ENSG00000229754 | CXCR2P1        | chemokine (C-X-C motif) receptor 2 pseudogene 1 [Source:HGNC Symbol;Acc:6028]                         | 1.791847591  | 4.868496078 | 20.42450865 | 6.20E-06 | 0.000141974 | 3.326414242  | 4.088156756  | 5.060139753  | 5.724200942  | 5.023275359  |
| ENSG00000126861 | OMG            | oligodendrocyte myelin glycoprotein [Source:HGNC Symbol;Acc:8135]                                     | 2.825901971  | 0.804206204 | 20.42034785 | 6.22E-06 | 0.000142098 | -0.14487434  | -1.289265519 | 0.570569237  | 1.414416401  | 1.596341512  |
| ENSG00000143382 | ADAMTSL4       | ADAMTS-like 4 [Source:HGNC Symbol;Acc:19706]                                                          | 1.928793001  | 6.05622184  | 20.41566249 | 6.23E-06 | 0.000142261 | 4.085784489  | 4.898351828  | 5.739326907  | 6.806845016  | 6.910269821  |
| ENSG00000104267 | CA2            | carbonic anhydrase II [Source:HGNC Symbol;Acc:1373]                                                   | -2.38257491  | 6.467048113 | 20.35642378 | 6.43E-06 | 0.000146543 | 7.175861076  | 7.545216297  | 3.690375259  | 5.497899733  | 5.714390898  |
| ENSG00000102174 | PHEX           | phosphate regulating endopeptidase homolog, X-linked [Source:HGNC Symbol;Acc:8918]                    | 2.973880234  | 0.131847739 | 20.33907203 | 6.49E-06 | 0.000147686 | -2.322346157 | -1.394066322 | -1.315629595 | 0.154058352  | 1.658245749  |
| ENSG00000258732 | RP11-603B24.1  |                                                                                                       | 2.595264703  | -0.04075893 | 20.33421848 | 6.50E-06 | 0.000147869 | -1.034594152 | -1.014020025 | 0.401591237  | 0.798919003  | -0.894110176 |



|                 |               |                                                                                                                                   |              |              |             |          |             |              |              |              |              |              |
|-----------------|---------------|-----------------------------------------------------------------------------------------------------------------------------------|--------------|--------------|-------------|----------|-------------|--------------|--------------|--------------|--------------|--------------|
| ENSG00000130700 | GATA5         | GATA binding protein 5 [Source:HGNC Symbol;Acc:15802]                                                                             | -8.325402345 | -0.155477427 | 20.28611116 | 6.67E-06 | 0.000151438 | 1.431768352  | 0.555709266  | -7.002070102 | -7.002070102 | -7.002070102 |
| ENSG00000254056 | IGHV3-71      | immunoglobulin heavy variable 3-71 (pseudogene) [Source:HGNC Symbol;Acc:5621]                                                     | -3.704145793 | 0.75782681   | 20.28250867 | 6.68E-06 | 0.000151528 | 2.187493018  | 0.968831255  | -2.845623393 | -7.002070102 | 0.615745481  |
| ENSG00000101412 | E2F1          | E2F transcription factor 1 [Source:HGNC Symbol;Acc:3113]                                                                          | -1.740643773 | 3.956600257  | 20.27682587 | 6.70E-06 | 0.000151703 | 4.337326037  | 4.585159354  | 2.253389193  | 2.580193821  | 4.484066609  |
| ENSG00000256448 | RP11-809N8.4  |                                                                                                                                   | 2.422241753  | 1.313847596  | 20.27536427 | 6.71E-06 | 0.000151703 | -0.094677427 | 0.171040209  | 1.517996407  | 2.203686226  | 1.3928929    |
| ENSG00000175262 | C1orf127      | chromosome 1 open reading frame 127 [Source:HGNC Symbol;Acc:26730]                                                                | 2.582933165  | 0.249605311  | 20.24883544 | 6.80E-06 | 0.000153623 | -1.237502295 | -0.157588231 | 0.28980717   | 0.940331404  | 0.264147325  |
| ENSG00000147883 | CDKN2B        | cyclin-dependent kinase inhibitor 2B (p15, inhibits CDK4) [Source:HGNC Symbol;Acc:1788]                                           | 2.785102993  | 1.505216418  | 20.24597454 | 6.81E-06 | 0.000153655 | -0.365194284 | -0.112176905 | 0.9100098    | 2.354509285  | 2.390748373  |
| ENSG00000197721 | CR1L          | complement component (3b/4b) receptor 1-like [Source:HGNC Symbol;Acc:2335]                                                        | -2.445401227 | 1.6168938    | 20.22096096 | 6.90E-06 | 0.000155477 | 2.42108026   | 2.671789775  | -1.721358966 | -1.231517591 | 1.35601001   |
| ENSG00000198208 | RPS6KL1       | ribosomal protein S6 kinase-like 1 [Source:HGNC Symbol;Acc:20222]                                                                 | -2.094138371 | 2.674492681  | 20.21697502 | 6.91E-06 | 0.000155602 | 3.609842318  | 3.690259922  | 1.517996407  | 0.03296005   | 1.374569317  |
| ENSG00000218809 | RP1-229K20.5  |                                                                                                                                   | 4.51205772   | 1.336422255  | 20.20086345 | 6.97E-06 | 0.000156717 | -1.034594152 | -2.262017103 | -1.438615935 | 2.812574249  | 2.087470534  |
| ENSG00000141574 | SECTM1        | secreted and transmembrane 1 [Source:HGNC Symbol;Acc:10707]                                                                       | 2.02330199   | 6.316225493  | 20.16509526 | 7.10E-06 | 0.000159471 | 4.474571151  | 5.270360911  | 6.125883162  | 7.379536813  | 6.657631615  |
| ENSG00000118515 | SGK1          | serum/glucocorticoid regulated kinase 1 [Source:HGNC Symbol;Acc:10810]                                                            | 1.959422658  | 6.985002021  | 20.1462013  | 7.17E-06 | 0.000160848 | 5.640051903  | 5.499736832  | 6.777716269  | 8.09531238   | 7.274099455  |
| ENSG00000213694 | S1PR3         | sphingosine-1-phosphate receptor 3 [Source:HGNC Symbol;Acc:3167]                                                                  | 2.355294408  | 4.430929457  | 20.13615547 | 7.21E-06 | 0.000161489 | 2.636996308  | 3.185183524  | 3.926726325  | 5.682866335  | 4.681448344  |
| ENSG00000248429 | RP11-597D13.9 |                                                                                                                                   | 3.1758246    | 3.092598168  | 20.06129122 | 7.50E-06 | 0.000167722 | 0.848890306  | 1.494316873  | 1.992811462  | 4.521784194  | 3.430160334  |
| ENSG00000185499 | MUC1          | mucin 1, cell surface associated [Source:HGNC Symbol;Acc:7508]                                                                    | -1.991125914 | 2.534055616  | 20.01246736 | 7.69E-06 | 0.00017184  | 3.598444871  | 3.251828018  | 1.053829154  | 0.962608982  | 1.580441325  |
| ENSG00000151892 | GFRA1         | GDNF family receptor alpha 1 [Source:HGNC Symbol;Acc:4243]                                                                        | -7.967291865 | -0.337021073 | 20.00230313 | 7.73E-06 | 0.000172425 | 0.742455703  | 0.904001603  | -7.002070102 | -7.002070102 | -3.754655114 |
| ENSG00000164023 | SGMS2         | sphingomyelin synthase 2 [Source:HGNC Symbol;Acc:28395]                                                                           | 1.967493994  | 3.937180513  | 20.00111155 | 7.74E-06 | 0.000172425 | 2.038016118  | 3.105733301  | 4.068967903  | 4.462441992  | 4.632168294  |
| ENSG00000103196 | CRISPLD2      | cysteine-rich secretory protein LCCL domain containing 2 [Source:HGNC Symbol;Acc:25248]                                           | 1.729918206  | 4.962175166  | 19.99481942 | 7.77E-06 | 0.000172774 | 3.211414251  | 4.198147959  | 5.097969776  | 5.604456613  | 5.94446052   |
| ENSG00000088827 | SIGLEC1       | sialic acid binding Ig-like lectin 1, sialoadhesin [Source:HGNC Symbol;Acc:11127]                                                 | 2.94175205   | 3.926823639  | 19.95843061 | 7.91E-06 | 0.00017587  | 1.845762494  | 2.038220677  | 2.709464044  | 5.299968942  | 4.4668719    |
| ENSG00000273174 | RP11-434H6.6  |                                                                                                                                   | 2.859602723  | 1.611515072  | 19.95016935 | 7.95E-06 | 0.000176409 | 0.254194054  | 0.133828548  | 1.265630948  | 2.918936894  | 1.446507348  |
| ENSG00000215458 | AP001053.11   |                                                                                                                                   | 2.06352041   | 4.288994527  | 19.94589964 | 7.97E-06 | 0.00017658  | 2.394966414  | 3.491317573  | 4.370869767  | 5.340937098  | 4.302136394  |
| ENSG00000197299 | BLM           | Bloom syndrome, RecQ helicase-like [Source:HGNC Symbol;Acc:1058]                                                                  | -1.618895449 | 4.201296242  | 19.93861954 | 8.00E-06 | 0.00017703  | 4.782196375  | 4.825830186  | 3.206763523  | 2.622783341  | 4.352157627  |
| ENSG00000095002 | MSH2          | mutS homolog 2 [Source:HGNC Symbol;Acc:7325]                                                                                      | -1.76658684  | 5.769093578  | 19.89826091 | 8.17E-06 | 0.000180579 | 6.397898246  | 6.50599754   | 5.264935772  | 3.998553766  | 5.417119883  |
| ENSG00000101935 | AMMECR1       | Alport syndrome, mental retardation, midface hypoplasia and elliptocytosis chromosomal region gene 1 [Source:HGNC Symbol;Acc:467] | -1.527353955 | 5.177385752  | 19.8956459  | 8.18E-06 | 0.000180599 | 5.779470742  | 5.983655362  | 4.612674392  | 3.985013877  | 4.4668719    |
| ENSG00000259529 | RP11-468E2.4  | E3 ubiquitin-protein ligase RNF31 [Source:UniProtKB/TrEMBL;Acc:HOYM83]                                                            | 2.810940713  | 1.182595122  | 19.85745705 | 8.34E-06 | 0.000184011 | -0.365194284 | 0.207316148  | 0.6928072    | 2.354509285  | 1.259453775  |
| ENSG00000188158 | NHS           | Nance-Horan syndrome (congenital cataracts and dental anomalies) [Source:HGNC Symbol;Acc:7820]                                    | 2.799677983  | 2.37557879   | 19.79731204 | 8.61E-06 | 0.000189655 | 0.292419846  | 0.881727766  | 1.689321579  | 3.745865181  | 2.5705316    |
| ENSG00000100749 | VRK1          | vaccinia related kinase 1 [Source:HGNC Symbol;Acc:12718]                                                                          | -1.590945193 | 4.903521522  | 19.786998   | 8.66E-06 | 0.000190234 | 5.619524849  | 5.51157143   | 4.193266557  | 3.344953407  | 4.707302615  |
| ENSG00000144381 | HSPD1         | heat shock 60kDa protein 1 (chaperonin) [Source:HGNC Symbol;Acc:5261]                                                             | -1.471399913 | 6.31921762   | 19.78430729 | 8.67E-06 | 0.000190234 | 6.999701781  | 6.903606579  | 5.637397835  | 5.244227703  | 5.990383954  |
| ENSG00000101188 | NTSR1         | neurotensin receptor 1 (high affinity) [Source:HGNC Symbol;Acc:8039]                                                              | 2.78006547   | 1.036715727  | 19.78485454 | 8.67E-06 | 0.000190234 | -1.608074432 | -0.782968247 | -1.438615935 | 0.74852395   | 2.8278729    |
| ENSG00000206538 | VGLL3         | vestigial like 3 (Drosophila) [Source:HGNC Symbol;Acc:24327]                                                                      | -8.372528688 | -0.043234618 | 19.70570031 | 9.03E-06 | 0.000197974 | 1.249467958  | 1.09035546   | -7.002070102 | -7.002070102 | -7.002070102 |
| ENSG00000186638 | KIF24         | kinesin family member 24 [Source:HGNC Symbol;Acc:19916]                                                                           | -2.17925183  | 2.118689949  | 19.69936909 | 9.06E-06 | 0.000198383 | 2.979215452  | 2.865836059  | -0.453950945 | -0.099242291 | 2.19580308   |
| ENSG00000119280 | C1orf198      | chromosome 1 open reading frame 198 [Source:HGNC Symbol;Acc:25900]                                                                | -1.546886962 | 4.29157192   | 19.66916961 | 9.21E-06 | 0.000201042 | 5.011469904  | 5.002662158  | 3.281728793  | 3.140302572  | 3.883244358  |
| ENSG00000159714 | ZDHC1         | zinc finger, DHHC-type containing 1 [Source:HGNC Symbol;Acc:17916]                                                                | 2.558837866  | 1.290135465  | 19.67129604 | 9.20E-06 | 0.000201042 | 0.174562846  | 0.376157587  | 1.030832979  | 2.267710332  | 1.410986673  |
| ENSG00000085063 | CD59          | CD59 molecule, complement regulatory protein [Source:HGNC Symbol;Acc:1689]                                                        | -1.729906581 | 5.55626239   | 19.64754784 | 9.31E-06 | 0.000203077 | 6.329459238  | 6.169809228  | 4.976862123  | 3.67004846   | 5.261286535  |

|                 |               |                                                                                                                              |              |              |             |          |             |              |              |              |              |              |
|-----------------|---------------|------------------------------------------------------------------------------------------------------------------------------|--------------|--------------|-------------|----------|-------------|--------------|--------------|--------------|--------------|--------------|
| ENSG00000135519 | KCNH3         | potassium voltage-gated channel, subfamily H (eag-related), member 3 [Source:HGNC Symbol;Acc:6252]                           | 1.988711157  | 3.456102263  | 19.63865481 | 9.36E-06 | 0.000203519 | 1.752861822  | 2.612158157  | 3.571910301  | 4.092461225  | 4.016252961  |
| ENSG00000236345 | RP11-59D5_B.2 |                                                                                                                              | 2.491536275  | 0.290832734  | 19.63913837 | 9.35E-06 | 0.000203519 | -1.034594152 | -0.408932621 | 0.505333341  | 0.58582888   | 0.763888603  |
| ENSG00000213430 | HSPD1P1       | heat shock 60kDa protein 1 (chaperonin) pseudogene 1 [Source:HGNC Symbol;Acc:35133]                                          | -1.503294469 | 6.523281354  | 19.60125658 | 9.54E-06 | 0.000207285 | 7.243886426  | 7.123911359  | 5.821186175  | 5.253292298  | 6.20715315   |
| ENSG00000253250 | C8orf88       | chromosome 8 open reading frame 88 [Source:HGNC Symbol;Acc:44672]                                                            | -2.383970219 | 1.621356286  | 19.59302416 | 9.58E-06 | 0.000207922 | 2.591730062  | 2.377619831  | -0.99931534  | -0.655391447 | 1.446507348  |
| ENSG00000183722 | LHFP          | lipoma HMGIC fusion partner [Source:HGNC Symbol;Acc:6586]                                                                    | -2.334350585 | 1.62859108   | 19.56651306 | 9.72E-06 | 0.000210567 | 2.606977165  | 2.470096317  | -1.438615935 | -0.46496394  | 1.279288931  |
| ENSG00000183508 | FAM46C        | family with sequence similarity 46, member C [Source:HGNC Symbol;Acc:24712]                                                  | -1.825598766 | 6.368085904  | 19.5600213  | 9.75E-06 | 0.000211024 | 7.355860198  | 6.890767956  | 5.855128878  | 4.57878161   | 5.598779761  |
| ENSG00000127423 | AUNIP         | aurora kinase A and ninein interacting protein [Source:HGNC Symbol;Acc:28363]                                                | -2.415417425 | 1.596279877  | 19.5445636  | 9.83E-06 | 0.000212232 | 2.403723654  | 2.48494876   | -1.438615935 | -1.572251189 | 1.688229459  |
| ENSG00000138182 | KIF20B        | kinesin family member 20B [Source:HGNC Symbol;Acc:7212]                                                                      | -1.540621085 | 4.821440681  | 19.54441133 | 9.83E-06 | 0.000212232 | 5.341612239  | 5.562345304  | 4.145895048  | 3.234858397  | 4.709131739  |
| ENSG00000138028 | CGREF1        | cell growth regulator with EF-hand domain 1 [Source:HGNC Symbol;Acc:16962]                                                   | -2.81277409  | 1.218646975  | 19.50564918 | 1.00E-05 | 0.000216316 | 2.496700121  | 2.077947121  | -2.539967122 | -2.670141381 | 0.182236344  |
| ENSG00000102098 | SCML2         | sex comb on midleg-like 2 (Drosophila) [Source:HGNC Symbol;Acc:10581]                                                        | -1.870610552 | 2.80462609   | 19.48092129 | 1.02E-05 | 0.000218866 | 3.503870991  | 3.583904609  | 1.285196495  | 0.871357159  | 2.814341322  |
| ENSG00000270472 | IGHV3OR16-9   | immunoglobulin heavy variable 3/OR16-9 (non-functional) [Source:HGNC Symbol;Acc:5644]                                        | -4.711288012 | 0.222554211  | 19.39556201 | 1.06E-05 | 0.000228589 | 1.806678074  | 0.527293245  | -4.621297774 | -7.002070102 | -0.80787826  |
| ENSG00000166866 | MYO1A         | myosin IA [Source:HGNC Symbol;Acc:7595]                                                                                      | 2.364601713  | 0.088315897  | 19.34477296 | 1.09E-05 | 0.000234462 | -0.775407551 | -0.408932621 | 0.721814282  | 0.369457657  | -0.376928291 |
| ENSG00000143452 | HORMAD1       | HORMA domain containing 1 [Source:HGNC Symbol;Acc:25245]                                                                     | 2.772491641  | 0.226106299  | 19.29853185 | 1.12E-05 | 0.000239916 | -1.034594152 | -0.583862591 | -0.329705368 | 1.168289627  | 0.450630967  |
| ENSG00000165392 | WRN           | Werner syndrome, RecQ helicase-like [Source:HGNC Symbol;Acc:12791]                                                           | -1.497239166 | 4.703469339  | 19.26724382 | 1.14E-05 | 0.000243582 | 5.272774078  | 5.464576116  | 4.043343998  | 3.37017149   | 4.345117047  |
| ENSG00000137959 | IFI44L        | interferon-induced protein 44-like [Source:HGNC Symbol;Acc:17817]                                                            | 2.170916401  | 4.554196322  | 19.25082619 | 1.15E-05 | 0.000245386 | 2.857006212  | 3.256163405  | 4.054788623  | 5.392103294  | 5.385441744  |
| ENSG00000223552 | RP11-24F11.2  |                                                                                                                              | 2.459700806  | 0.598291954  | 19.22164267 | 1.16E-05 | 0.000248863 | -1.132483902 | -0.408932621 | -0.010608983 | 0.402426505  | 1.933259916  |
| ENSG00000170891 | CYTL1         | cytokine-like 1 [Source:HGNC Symbol;Acc:24435]                                                                               | -2.639873086 | 2.799616957  | 19.2149766  | 1.17E-05 | 0.000249429 | 3.887782536  | 3.494990685  | -1.57307192  | 1.314027603  | 2.487707366  |
| ENSG00000233822 | HIST1H2BN     | histone cluster 1, H2bn [Source:HGNC Symbol;Acc:4749]                                                                        | 2.640485003  | -0.089992043 | 19.20725221 | 1.17E-05 | 0.000250136 | -0.775407551 | -1.394066322 | -0.215316613 | 0.527247606  | 0.223773082  |
| ENSG00000166927 | MS4A7         | membrane-spanning 4-domains, subfamily A, member 7 [Source:HGNC Symbol;Acc:13378]                                            | 2.050979035  | 6.208719111  | 19.19267201 | 1.18E-05 | 0.000251748 | 4.453639214  | 5.351615674  | 6.056417168  | 7.332733458  | 6.304130865  |
| ENSG00000173535 | TNFRSF10C     | tumor necrosis factor receptor superfamily, member 10c, decoy without an intracellular domain [Source:HGNC Symbol;Acc:11906] | 1.970046681  | 4.233123628  | 19.15452448 | 1.21E-05 | 0.000256477 | 2.831271105  | 3.323814258  | 4.105194787  | 5.213207262  | 4.479787106  |
| ENSG00000172243 | CLEC7A        | C-type lectin domain family 7, member A [Source:HGNC Symbol;Acc:14558]                                                       | 2.328346774  | 7.19255208   | 19.15251988 | 1.21E-05 | 0.000256477 | 5.162291765  | 6.045075729  | 6.876957304  | 8.462085472  | 7.313408764  |
| ENSG00000214548 | MEG3          | maternally expressed 3 (non-protein coding) [Source:HGNC Symbol;Acc:14575]                                                   | 3.554328653  | 1.95183827   | 19.14281564 | 1.21E-05 | 0.000257473 | 0.329658892  | 0.095631612  | -0.059127673 | 3.848125445  | 0.378903451  |
| ENSG00000180535 | BHLHA15       | basic helix-loop-helix family, member a15 [Source:HGNC Symbol;Acc:22265]                                                     | -3.807824195 | 0.326103744  | 19.12746978 | 1.22E-05 | 0.000259238 | 1.79341104   | 0.715367718  | -3.233942493 | -7.002070102 | -0.376928291 |
| ENSG00000272632 | RP11-362F19.3 |                                                                                                                              | 3.205440155  | 0.549380773  | 19.12208183 | 1.23E-05 | 0.000259657 | -1.608074432 | -0.583862591 | 0.250534523  | 1.79568083   | 0.450630967  |
| ENSG00000196873 | CBWD3         | COBW domain containing 3 [Source:HGNC Symbol;Acc:18519]                                                                      | 2.507748906  | 0.103169808  | 19.11640294 | 1.23E-05 | 0.000260117 | -0.425964666 | -0.523165112 | 0.210162819  | 0.984547783  | -0.9858258   |
| ENSG00000161944 | ASGR2         | asialoglycoprotein receptor 2 [Source:HGNC Symbol;Acc:743]                                                                   | 1.838985901  | 4.984638236  | 19.09695814 | 1.24E-05 | 0.000262465 | 3.449931193  | 4.359970556  | 5.153582945  | 5.972180623  | 4.816538401  |
| ENSG00000187715 | KBTBD12       | kelch repeat and BTB (POZ) domain containing 12 [Source:HGNC Symbol;Acc:25731]                                               | -2.716530264 | 1.221625959  | 19.08461644 | 1.25E-05 | 0.00026385  | 2.350364654  | 2.287305009  | -3.233942493 | -2.0191864   | 0.002986071  |
| ENSG00000136732 | GYPC          | glycophorin C (Gerbich blood group) [Source:HGNC Symbol;Acc:4704]                                                            | -1.855893312 | 6.678169304  | 18.99853416 | 1.31E-05 | 0.000275693 | 7.371010443  | 7.456164799  | 6.162710168  | 4.693112741  | 6.191536847  |
| ENSG00000186407 | CD300E        | CD300e molecule [Source:HGNC Symbol;Acc:28874]                                                                               | 2.536461786  | 7.692766177  | 18.98546308 | 1.32E-05 | 0.000277256 | 5.034206909  | 6.111783523  | 6.950025987  | 8.875250741  | 8.405371625  |
| ENSG00000223511 | RP13-297E16.4 |                                                                                                                              | 2.441097458  | 0.114665937  | 18.94471186 | 1.35E-05 | 0.000282902 | -0.489407866 | -0.464918547 | 0.125863448  | 0.847612951  | -0.316136847 |
| ENSG00000113303 | BTNL8         | butyrophilin-like 8 [Source:HGNC Symbol;Acc:26131]                                                                           | 3.368886857  | 0.835653741  | 18.92975535 | 1.36E-05 | 0.000284787 | -1.132483902 | -2.076136033 | -3.233942493 | 1.493047208  | 2.3444256    |
| ENSG0000018280  | SLC11A1       | solute carrier family 11 (proton-coupled divalent metal ion transporter), member 1 [Source:HGNC Symbol;Acc:10907]            | 2.456634936  | 8.032631787  | 18.89346463 | 1.38E-05 | 0.00028991  | 5.900421316  | 6.615501972  | 7.573759962  | 9.357259047  | 8.251804454  |
| ENSG00000106991 | ENG           | endoglin [Source:HGNC Symbol;Acc:3349]                                                                                       | -1.591544437 | 6.142002829  | 18.85164239 | 1.41E-05 | 0.000295983 | 6.806862961  | 6.78034359   | 4.821385224  | 5.507402052  | 5.83656093   |

|                 |               |                                                                                                                                                                                                                 |              |              |             |          |             |              |              |              |              |              |
|-----------------|---------------|-----------------------------------------------------------------------------------------------------------------------------------------------------------------------------------------------------------------|--------------|--------------|-------------|----------|-------------|--------------|--------------|--------------|--------------|--------------|
| ENSG00000087842 | PIR           | pirin (iron-binding nuclear protein) [Source:HGNC Symbol;Acc:30048]                                                                                                                                             | -2.600714238 | 1.299099508  | 18.81704932 | 1.44E-05 | 0.000301041 | 2.504862786  | 2.253009061  | -2.845623393 | -1.572251189 | 0.095393329  |
| ENSG00000203804 | ADAMTSL4-AS1  | ADAMTSL4 antisense RNA 1 [Source:HGNC Symbol;Acc:32041]                                                                                                                                                         | 3.87618509   | -0.623996686 | 18.75147    | 1.49E-05 | 0.000311201 | -2.108017771 | -3.940353384 | -3.23942493  | 0.61425099   | 0.04992943   |
| ENSG0000011644  | ACRBP         | acrosin binding protein [Source:HGNC Symbol;Acc:17195]                                                                                                                                                          | 1.725283545  | 4.785702225  | 18.73749445 | 1.50E-05 | 0.000312976 | 3.483362881  | 3.958479768  | 4.782333156  | 5.692895183  | 4.984532378  |
| ENSG00000152207 | CYSLTR2       | cysteinyl leukotriene receptor 2 [Source:HGNC Symbol;Acc:18274]                                                                                                                                                 | 2.048266289  | 2.45912255   | 18.73609205 | 1.50E-05 | 0.000312976 | 1.16956809   | 1.711936244  | 2.840873769  | 3.32789308   | 2.164148811  |
| ENSG00000270120 | RP11-327F22.6 |                                                                                                                                                                                                                 | 3.009301752  | 0.521450651  | 18.7150627  | 1.52E-05 | 0.000316071 | -1.237502295 | -0.647226338 | 0.081791624  | 1.679439471  | 0.646616095  |
| ENSG00000175793 | SFN           | stratifin [Source:HGNC Symbol;Acc:10773]                                                                                                                                                                        | 3.314673323  | -0.022842732 | 18.70582663 | 1.53E-05 | 0.000317229 | -1.237502295 | -2.262017103 | -1.202308962 | 1.206127397  | 0.341656497  |
| ENSG00000118785 | SPP1          | secreted phosphoprotein 1 [Source:HGNC Symbol;Acc:11255]                                                                                                                                                        | -3.06949206  | 0.766183059  | 18.69775966 | 1.53E-05 | 0.000318197 | 1.498692903  | 2.244306154  | -1.886652327 | -7.002070102 | -1.70800759  |
| ENSG00000261056 | RP11-454F8.2  |                                                                                                                                                                                                                 | -2.514653571 | 0.813313867  | 18.68067714 | 1.55E-05 | 0.000320681 | 1.89628059   | 1.607225949  | -1.721358966 | -2.0191864   | 0.223773082  |
| ENSG00000261997 | RP11-212I21.4 |                                                                                                                                                                                                                 | 2.920152584  | 0.639549426  | 18.67360358 | 1.55E-05 | 0.000321493 | -1.034594152 | -0.932821174 | 0.28980717   | 1.770646721  | 0.898226269  |
| ENSG00000152455 | SUV39H2       | suppressor of variegation 3-9 homolog 2 (Drosophila) [Source:HGNC Symbol;Acc:17287]                                                                                                                             | -1.957557666 | 2.520917175  | 18.6264507  | 1.59E-05 | 0.000329154 | 3.358298947  | 3.269091943  | 1.120696904  | 0.03296005   | 2.408868893  |
| ENSG00000184678 | HIST2H2BE     | histone cluster 2, H2be [Source:HGNC Symbol;Acc:4760]                                                                                                                                                           | 1.88856517   | 4.680802778  | 18.6213343  | 1.59E-05 | 0.00032965  | 3.536089402  | 3.247479563  | 4.283583984  | 5.575838958  | 5.311515536  |
| ENSG00000119686 | FLVCR2        | feline leukemia virus subgroup C cellular receptor family, member 2 [Source:HGNC Symbol;Acc:20105]                                                                                                              | 1.967188884  | 3.983820968  | 18.58675848 | 1.62E-05 | 0.000335289 | 2.071376358  | 2.964512035  | 3.730177502  | 4.643988414  | 4.836757869  |
| ENSG00000136492 | BRIP1         | BRCA1 interacting protein C-terminal helicase 1 [Source:HGNC Symbol;Acc:20473]                                                                                                                                  | -1.916301795 | 2.844932716  | 18.5838027  | 1.63E-05 | 0.000335414 | 3.385078807  | 3.563059673  | 1.582674799  | 0.402426505  | 3.178820438  |
| ENSG00000226971 | AF196972.4    |                                                                                                                                                                                                                 | -1.515557505 | 4.434633104  | 18.57956516 | 1.63E-05 | 0.000335766 | 5.170011935  | 5.093893865  | 3.46445507   | 3.48235623   | 3.949734605  |
| ENSG00000124313 | IQSEC2        | IQ motif and Sec7 domain 2 [Source:HGNC Symbol;Acc:29059]                                                                                                                                                       | 1.873535447  | 4.23005775   | 18.57108483 | 1.64E-05 | 0.000336868 | 2.869703637  | 3.229953478  | 4.083009179  | 5.186245939  | 4.554940616  |
| ENSG00000135919 | SERPINE2      | serpin peptidase inhibitor, clade E (nexin, plasminogen activator inhibitor type 1), member 2 [Source:HGNC Symbol;Acc:8951]                                                                                     | -2.050529109 | 3.109883825  | 18.55684487 | 1.65E-05 | 0.000338996 | 4.118070306  | 3.82768418   | 2.118106677  | 0.369457657  | 2.504656975  |
| ENSG0000010030  | ETV7          | ets variant 7 [Source:HGNC Symbol;Acc:18160]                                                                                                                                                                    | 2.368630261  | 0.901327705  | 18.54541804 | 1.66E-05 | 0.000340636 | -0.196880952 | 0.468724906  | 1.098750223  | 1.75796486   | 0.341656497  |
| ENSG00000114698 | PLSCR4        | phospholipid scramblase 4 [Source:HGNC Symbol;Acc:16497]                                                                                                                                                        | -2.74951417  | 1.166709116  | 18.54028346 | 1.66E-05 | 0.000341156 | 2.103982592  | 2.135558076  | -3.233942493 | -2.419096061 | 0.948644093  |
| ENSG00000125885 | MCM8          | minichromosome maintenance complex component 8 [Source:HGNC Symbol;Acc:16147]                                                                                                                                   | -1.488264601 | 4.633792255  | 18.532264   | 1.67E-05 | 0.000342093 | 5.277546306  | 5.233457778  | 3.840088097  | 3.095642933  | 4.618607854  |
| ENSG00000260929 | RP11-327F22.1 |                                                                                                                                                                                                                 | 2.588116659  | 0.351202202  | 18.53060323 | 1.67E-05 | 0.000342093 | -1.034594152 | -0.464918547 | 0.365283811  | 1.27894994   | 0.223773082  |
| ENSG00000154096 | THY1          | Thy-1 cell surface antigen [Source:HGNC Symbol;Acc:11801]                                                                                                                                                       | -8.134494681 | -0.223546725 | 18.51569925 | 1.69E-05 | 0.000344378 | 1.040754067  | 0.812765477  | -7.002070102 | -7.002070102 | -2.832686105 |
| ENSG00000241489 | IDS           | Iduronate 2-sulfatase (Hunter syndrome), isoform CRA_e; Iduronate 2-sulfatase 14 kDa chain; cDNA FLJ42669 fis, clone BRAMY2022168, highly similar to IDURONATE 2-SULFATASE [Source:UniProtKB/TrEMBL;Acc:B3KWA1] | 2.542500487  | 0.08614527   | 18.48310146 | 1.71E-05 | 0.000349911 | -1.756270337 | -0.355038393 | 0.250534523  | 0.03296005   | 0.819133578  |
| ENSG00000109881 | CCDC34        | coiled-coil domain containing 34 [Source:HGNC Symbol;Acc:25079]                                                                                                                                                 | -1.865150955 | 2.72072927   | 18.43222645 | 1.76E-05 | 0.000358934 | 3.583106845  | 3.480241792  | 1.415193986  | 0.527247606  | 2.435629945  |
| ENSG00000225062 | AC021016.6    |                                                                                                                                                                                                                 | 2.964966766  | 0.192098931  | 18.43015407 | 1.76E-05 | 0.000358934 | -1.608074432 | -1.191564836 | -1.097244829 | 0.871357159  | 1.259453775  |
| ENSG00000204634 | TBC1D8        | TBC1 domain family, member 8 (with GRAM domain) [Source:HGNC Symbol;Acc:17791]                                                                                                                                  | 1.856392672  | 5.143375009  | 18.40310735 | 1.79E-05 | 0.000363643 | 3.613621545  | 4.182288334  | 4.926356237  | 6.241234525  | 5.321115655  |
| ENSG00000230724 | LINC01001     | long intergenic non-protein coding RNA 1001 [Source:HGNC Symbol;Acc:38540]                                                                                                                                      | 2.388850915  | 2.230793588  | 18.39804721 | 1.79E-05 | 0.000364188 | 0.94800933   | 0.689955027  | 1.842443831  | 3.145180481  | 2.854561153  |
| ENSG00000222009 | BTBD19        | BTB (POZ) domain containing 19 [Source:HGNC Symbol;Acc:27145]                                                                                                                                                   | 2.652846379  | 1.720523814  | 18.39022563 | 1.80E-05 | 0.000365263 | 0.292419846  | 0.277241192  | 1.120696904  | 2.918936894  | 2.006486965  |
| ENSG00000061656 | SPAG4         | sperm associated antigen 4 [Source:HGNC Symbol;Acc:11214]                                                                                                                                                       | -2.516993628 | 1.452398239  | 18.38077448 | 1.81E-05 | 0.000366656 | 2.702339162  | 1.933837788  | -0.740035668 | -2.205328685 | 1.177268129  |
| ENSG00000104889 | RNASEH2A      | ribonuclease H2, subunit A [Source:HGNC Symbol;Acc:18518]                                                                                                                                                       | -1.58809023  | 3.940376241  | 18.36314756 | 1.83E-05 | 0.000369637 | 4.646747126  | 4.571308358  | 2.860570679  | 2.836897298  | 3.725915699  |
| ENSG00000214881 | TMEM14D       | transmembrane protein 14D (pseudogene) [Source:HGNC Symbol;Acc:15660]                                                                                                                                           | -1.389370692 | 5.535914984  | 18.35285079 | 1.84E-05 | 0.000371212 | 6.367445835  | 6.13315478   | 4.717204047  | 4.414762411  | 4.967822647  |
| ENSG00000082014 | SMARCD3       | SWI/SNF related, matrix associated, actin dependent regulator of chromatin, subfamily d, member 3 [Source:HGNC Symbol;Acc:11108]                                                                                | 1.874245365  | 5.293351843  | 18.31532307 | 1.87E-05 | 0.000378161 | 3.658216533  | 4.512724313  | 5.106243416  | 6.25314475   | 5.632905242  |

|                 |                |                                                                                                   |              |              |             |          |             |              |              |              |              |              |
|-----------------|----------------|---------------------------------------------------------------------------------------------------|--------------|--------------|-------------|----------|-------------|--------------|--------------|--------------|--------------|--------------|
| ENSG00000113140 | SPARC          | secreted protein, acidic, cysteine-rich (osteonectin) [Source:HGNC Symbol;Acc:11219]              | 1.701217316  | 6.691548237  | 18.30625546 | 1.88E-05 | 0.000379528 | 5.042641743  | 5.73845476   | 6.51625548   | 7.395233088  | 7.412157921  |
| ENSG00000215440 | NPEPL1         | aminopeptidase-like 1 [Source:HGNC Symbol;Acc:16244]                                              | 1.501714858  | 4.434171062  | 18.28330468 | 1.90E-05 | 0.000383687 | 3.544032825  | 3.950476219  | 5.019831858  | 4.96548179   | 4.088296742  |
| ENSG00000255163 | HSPE1P18       | heat shock 10kDa protein 1 pseudogene 18 [Source:HGNC Symbol;Acc:49337]                           | 2.887304804  | 1.105094052  | 18.27642607 | 1.91E-05 | 0.000384634 | -1.47369337  | 0.498306264  | 1.956663165  | 1.992567844  | -0.257803757 |
| ENSG00000205846 | CLEC6A         | C-type lectin domain family 6, member A [Source:HGNC Symbol;Acc:14556]                            | 2.694910376  | 0.9958681    | 18.26853294 | 1.92E-05 | 0.000385788 | -0.856736938 | 0.277241192  | 0.721814282  | 1.856429106  | 1.410986673  |
| ENSG00000261222 | CTD-2006K23.1  |                                                                                                   | 2.368292452  | 2.847341596  | 18.26468054 | 1.92E-05 | 0.000386127 | 0.686141241  | 1.844528154  | 2.71668701   | 3.900992258  | 3.168221511  |
| ENSG00000173894 | CBX2           | chromobox homolog 2 [Source:HGNC Symbol;Acc:1552]                                                 | -2.20388562  | 2.872997379  | 18.26170975 | 1.93E-05 | 0.000386288 | 3.690780833  | 3.607849048  | -0.66302287  | 1.43048915   | 2.981063822  |
| ENSG00000142178 | SIK1           | salt-inducible kinase 1 [Source:HGNC Symbol;Acc:11142]                                            | -1.563079252 | 6.321159335  | 18.23859097 | 1.95E-05 | 0.000390558 | 7.297145635  | 6.681863005  | 5.483939025  | 5.585740437  | 5.547562832  |
| ENSG00000226259 | GTF2H2B        | general transcription factor IIH, polypeptide 2B (pseudogene) [Source:HGNC Symbol;Acc:31393]      | 2.481694015  | 0.375398695  | 18.22730042 | 1.96E-05 | 0.000392432 | -0.365194284 | -0.157588231 | 0.250534523  | 1.261086007  | -0.095747566 |
| ENSG00000144354 | CDCA7          | cell division cycle associated 7 [Source:HGNC Symbol;Acc:14628]                                   | -1.574887607 | 3.996264561  | 18.1997738  | 1.99E-05 | 0.000397692 | 4.34870842   | 4.359970556  | 2.680205034  | 2.213008328  | 4.785667729  |
| ENSG00000167995 | BEST1          | bestrophin 1 [Source:HGNC Symbol;Acc:12703]                                                       | 2.305345394  | 3.85359224   | 18.18526831 | 2.00E-05 | 0.000400276 | 2.093195522  | 2.455089377  | 3.154531226  | 4.864099294  | 4.599011985  |
| ENSG00000182704 | TSKU           | tsukushi, small leucine rich proteoglycan [Source:HGNC Symbol;Acc:28850]                          | -3.874486584 | 0.369746701  | 18.18091745 | 2.01E-05 | 0.000400736 | 1.752861822  | 1.202433699  | -3.766908349 | -7.002070102 | -1.3021922   |
| ENSG00000223855 | AC147651.3     |                                                                                                   | 2.986136609  | 1.333432818  | 18.16999596 | 2.02E-05 | 0.000402583 | -1.034594152 | 0.133828548  | 0.632982468  | 2.572971709  | 1.688229459  |
| ENSG00000196209 | SIRPB2         | signal-regulatory protein beta 2 [Source:HGNC Symbol;Acc:16247]                                   | 1.782762529  | 5.643306681  | 18.16604384 | 2.02E-05 | 0.000402962 | 4.149649391  | 4.976626419  | 5.656303354  | 6.584276941  | 5.754799245  |
| ENSG00000272625 | RP11-737O24.5  |                                                                                                   | 2.772172365  | 0.360165946  | 18.15361707 | 2.04E-05 | 0.000405141 | -1.350769713 | -0.583862591 | 0.125863448  | 1.296595379  | 0.615745481  |
| ENSG00000187902 | SHISA7         | shisa family member 7 [Source:HGNC Symbol;Acc:35409]                                              | -8.173336294 | -0.162578136 | 18.13251095 | 2.06E-05 | 0.000409193 | 0.365968855  | 1.237938318  | -7.002070102 | -7.002070102 | -1.083770229 |
| ENSG00000164694 | FNDC1          | fibronectin type III domain containing 1 [Source:HGNC Symbol;Acc:21184]                           | -4.444023385 | -0.031240429 | 18.08607085 | 2.11E-05 | 0.000418821 | 1.268770164  | 1.010487126  | -7.002070102 | -4.730697034 | -3.221241555 |
| ENSG00000137309 | HMGAI1         | high mobility group AT-hook 1 [Source:HGNC Symbol;Acc:5010]                                       | -1.528056799 | 7.332690561  | 18.0791247  | 2.12E-05 | 0.000419878 | 7.997490037  | 7.929748255  | 6.581999324  | 6.495867034  | 6.909872245  |
| ENSG00000160298 | C21orf58       | chromosome 21 open reading frame 58 [Source:HGNC Symbol;Acc:1300]                                 | -1.576695151 | 4.026505675  | 18.07470313 | 2.12E-05 | 0.000420379 | 4.449416135  | 4.702587364  | 2.918097532  | 2.311762486  | 4.377683051  |
| ENSG00000260528 | FAM157C        | family with sequence similarity 157, member C [Source:HGNC Symbol;Acc:34081]                      | 2.781717162  | 3.871801942  | 18.05771739 | 2.14E-05 | 0.000423669 | 1.819824215  | 1.955327308  | 2.532495892  | 5.159976647  | 4.583141364  |
| ENSG00000166483 | WEE1           | WEE1 G2 checkpoint kinase [Source:HGNC Symbol;Acc:12761]                                          | -1.561335935 | 4.087353338  | 18.03770017 | 2.17E-05 | 0.000427665 | 4.825203682  | 4.707344697  | 2.997340322  | 2.756300061  | 3.95282564   |
| ENSG00000235323 | COTL1P2        | coactosin-like 1 (Dictyostelium) pseudogene 2 [Source:HGNC Symbol;Acc:24322]                      | 1.663614044  | 4.53792989   | 18.00932839 | 2.20E-05 | 0.000433599 | 3.424338996  | 4.048714319  | 4.704544584  | 5.263422351  | 4.591098498  |
| ENSG00000138623 | SEMA7A         | semaphorin 7A, GPI membrane anchor (John Milton Hagen blood group) [Source:HGNC Symbol;Acc:10741] | -1.629099503 | 3.855623214  | 17.99823465 | 2.21E-05 | 0.000435644 | 4.654105544  | 4.571308358  | 2.548775847  | 2.615771827  | 3.478147665  |
| ENSG00000261596 | CTB-31N19.3    |                                                                                                   | 2.30618842   | 2.023358443  | 17.98712023 | 2.22E-05 | 0.000437703 | 0.657137645  | 1.050973916  | 1.932051102  | 2.824787032  | 2.461903625  |
| ENSG00000197253 | TPSB2          | trypsin beta 2 (gene/pseudogene) [Source:HGNC Symbol;Acc:14120]                                   | -3.627205534 | 2.509209291  | 17.93009957 | 2.29E-05 | 0.000450509 | 4.52961579   | 1.355744383  | -1.57307192  | -0.146146183 | 0.415212929  |
| ENSG00000178175 | ZNF366         | zinc finger protein 366 [Source:HGNC Symbol;Acc:18316]                                            | 2.815835086  | 0.248327835  | 17.90115779 | 2.33E-05 | 0.0004569   | -2.108017771 | -0.157588231 | 0.401591237  | 0.669468625  | 0.706443614  |
| ENSG00000152253 | SPC25          | SPC25, NDC80 kinetochore complex component [Source:HGNC Symbol;Acc:24031]                         | -2.23840744  | 1.91648747   | 17.89447821 | 2.33E-05 | 0.000457994 | 3.036645193  | 2.521424373  | -0.82139248  | -0.350682213 | 1.71760268   |
| ENSG00000134780 | DAGLA          | diacylglycerol lipase, alpha [Source:HGNC Symbol;Acc:1165]                                        | 2.255637879  | 2.809222642  | 17.88675258 | 2.34E-05 | 0.000459344 | 0.874315765  | 2.08771013   | 2.873554121  | 3.774480849  | 2.938038295  |
| ENSG00000235117 | RP11-229P13.20 |                                                                                                   | 1.89130817   | 2.287279981  | 17.87870646 | 2.35E-05 | 0.000460776 | 1.16956809   | 1.494316873  | 2.814185793  | 2.475638093  | 2.701261324  |
| ENSG00000256433 | RP1-102E24.8   |                                                                                                   | 3.68014212   | -0.323788572 | 17.82311387 | 2.42E-05 | 0.000473908 | -4.650190627 | -1.394066322 | -1.097244829 | 0.58582888   | 0.415212929  |
| ENSG00000211899 | IGHM           | immunoglobulin heavy constant mu [Source:HGNC Symbol;Acc:5541]                                    | -2.383073493 | 10.67707846  | 17.80672046 | 2.45E-05 | 0.000477477 | 12.06634136  | 11.14435456  | 8.54751425   | 8.866139395  | 9.631185998  |
| ENSG00000225936 | RP11-501J20.5  |                                                                                                   | 2.530789636  | 1.587087557  | 17.78101196 | 2.48E-05 | 0.000483434 | -0.196880952 | 0.277241192  | 1.360908506  | 2.664151552  | 1.908000984  |
| ENSG00000116991 | SIPA1L2        | signal-induced proliferation-associated 1 like 2 [Source:HGNC Symbol;Acc:23800]                   | 1.98024839   | 3.341819341  | 17.76889706 | 2.49E-05 | 0.000485982 | 1.79341104   | 1.965953212  | 2.905510557  | 3.963082217  | 4.321397158  |
| ENSG00000133739 | LRRCC1         | leucine rich repeat and coiled-coil centrosomal protein 1 [Source:HGNC Symbol;Acc:29373]          | -1.546452266 | 4.012182014  | 17.75953261 | 2.51E-05 | 0.000487839 | 4.521592368  | 4.67694653   | 2.955212673  | 2.420374188  | 4.227527885  |
| ENSG00000140479 | PCSK6          | proprotein convertase subtilisin/kexin type 6 [Source:HGNC Symbol;Acc:8569]                       | 2.687528131  | 3.240862835  | 17.73932557 | 2.53E-05 | 0.000492502 | 0.329658892  | 1.965953212  | 2.627528952  | 4.400553776  | 3.860382081  |

|                 |               |                                                                                                                                             |              |              |             |          |             |              |              |              |              |              |
|-----------------|---------------|---------------------------------------------------------------------------------------------------------------------------------------------|--------------|--------------|-------------|----------|-------------|--------------|--------------|--------------|--------------|--------------|
| ENSG00000182310 | SPACA6P       | sperm acrosome associated 6, pseudogene [Source:HGNC Symbol;Acc:27113]                                                                      | 2.435360437  | 0.14160091   | 17.71647492 | 2.56E-05 | 0.000497902 | -1.132483902 | -0.252938016 | 0.036330944  | 0.722650538  | 0.341656497  |
| ENSG00000166508 | MCM7          | minichromosome maintenance complex component 7 [Source:HGNC Symbol;Acc:6950]                                                                | -1.579564498 | 7.380988375  | 17.71342209 | 2.57E-05 | 0.000498151 | 7.950637677  | 8.025555626  | 6.762964825  | 6.226350987  | 7.146680044  |
| ENSG00000196565 | HGB2          | hemoglobin, gamma G [Source:HGNC Symbol;Acc:4832]                                                                                           | -3.046683997 | 4.467338929  | 17.71082316 | 2.57E-05 | 0.000498282 | 5.592012371  | 5.597792608  | 3.425312536  | -0.589083246 | 1.134350211  |
| ENSG00000168497 | SDPR          | serum deprivation response [Source:HGNC Symbol;Acc:10690]                                                                                   | 2.235255862  | 6.501993429  | 17.63511624 | 2.68E-05 | 0.000517372 | 4.633778887  | 5.33121339   | 5.892283867  | 7.774693597  | 6.7736102    |
| ENSG00000152503 | TRIM36        | tripartite motif containing 36 [Source:HGNC Symbol;Acc:16280]                                                                               | 2.497873766  | 0.615813147  | 17.63693869 | 2.67E-05 | 0.000517372 | -0.775407551 | 0.056395802  | 0.210162819  | 1.381723529  | 0.997359302  |
| ENSG00000182022 | CHST15        | carbohydrate (N-acetylglucosamine 4-sulfate 6-O) sulfotransferase 15 [Source:HGNC Symbol;Acc:18137]                                         | 1.806903198  | 6.788033246  | 17.63067355 | 2.68E-05 | 0.000518012 | 5.298828106  | 5.64732062   | 6.446286176  | 7.858201765  | 7.165382769  |
| ENSG00000143226 | FCGR2A        | Fc fragment of IgG, low affinity Ila, receptor (CD32) [Source:HGNC Symbol;Acc:3616]                                                         | 1.822780633  | 7.155258899  | 17.6149041  | 2.70E-05 | 0.000521751 | 5.492903791  | 6.050702052  | 6.91748469   | 7.999072743  | 7.810023262  |
| ENSG00000170323 | FABP4         | fatty acid binding protein 4, adipocyte [Source:HGNC Symbol;Acc:3559]                                                                       | -8.080298762 | -0.399194143 | 17.58945025 | 2.74E-05 | 0.000528201 | 1.210071084  | 0.095631612  | -7.002070102 | -7.002070102 | -3.221241555 |
| ENSG00000225177 | RP11-390P2.4  |                                                                                                                                             | 2.424979197  | 0.157580426  | 17.55249329 | 2.79E-05 | 0.000537976 | -1.132483902 | -0.523165112 | 0.28980717   | 0.917704421  | 0.04992943   |
| ENSG00000164070 | HSPA4L        | heat shock 70kDa protein 4-like [Source:HGNC Symbol;Acc:17041]                                                                              | -2.788181923 | 0.998465502  | 17.54974234 | 2.80E-05 | 0.000538165 | 2.015339542  | 2.048255313  | -4.621297774 | -2.205328685 | 0.303422373  |
| ENSG00000070731 | ST6GALNAC2    | ST6 (alpha-N-acetyl-neuraminy-2,3-beta-galactosyl-1,3)-N-acetylglucosaminidase alpha-2,6-sialyltransferase 2 [Source:HGNC Symbol;Acc:10867] | 2.282578368  | 2.6659139    | 17.54187005 | 2.81E-05 | 0.000539806 | 1.431768352  | 1.010487126  | 2.150470541  | 3.427354029  | 3.532875847  |
| ENSG00000117114 | LPHN2         | latrophilin 2 [Source:HGNC Symbol;Acc:18582]                                                                                                | -7.843227794 | -0.573210396 | 17.53294732 | 2.82E-05 | 0.000541497 | 0.657137645  | 0.468724906  | -7.002070102 | -7.002070102 | -3.754655114 |
| ENSG00000105808 | RASA4         | RAS p21 protein activator 4 [Source:HGNC Symbol;Acc:23181]                                                                                  | 2.446249775  | 1.913442503  | 17.53176729 | 2.83E-05 | 0.000541497 | 0.174562846  | 1.355744383  | 1.89432737   | 2.947141733  | 1.774613685  |
| ENSG00000272168 | CASC15        | cancer susceptibility candidate 15 (non-protein coding) [Source:HGNC Symbol;Acc:28245]                                                      | 3.113867159  | -0.358716023 | 17.52737724 | 2.83E-05 | 0.000542157 | -1.756270337 | -2.475439898 | -2.073364206 | 0.773941511  | 0.264147325  |
| ENSG00000269925 | RP3-467L1.6   |                                                                                                                                             | 3.069470153  | 0.502254798  | 17.4959238  | 2.88E-05 | 0.0005506   | -0.775407551 | -1.100062965 | -0.215316613 | 1.75796486   | 0.584199832  |
| ENSG00000183853 | KIRREL        | kin of IRRE like (Drosophila) [Source:HGNC Symbol;Acc:15734]                                                                                | -3.668526536 | 0.319734583  | 17.47492427 | 2.91E-05 | 0.00055611  | 1.79341104   | 1.147482679  | -3.23942493  | -7.002070102 | -2.832686105 |
| ENSG00000232486 | RP11-18B3.2   |                                                                                                                                             | -2.607603653 | 0.626088893  | 17.47119157 | 2.92E-05 | 0.000556597 | 1.46561866   | 1.418980604  | -2.845623393 | -2.205328685 | 0.706443614  |
| ENSG00000228519 | RP11-29B3.2   |                                                                                                                                             | -1.388118335 | 5.022815489  | 17.46262311 | 2.93E-05 | 0.000558505 | 5.737656593  | 5.550039086  | 4.110688288  | 3.808701883  | 4.943166794  |
| ENSG00000167703 | SLC43A2       | solute carrier family 43 (amino acid system L transporter), member 2 [Source:HGNC Symbol;Acc:23087]                                         | 1.800813717  | 7.000392982  | 17.45155056 | 2.95E-05 | 0.000561158 | 5.487765045  | 6.032493671  | 6.790180281  | 8.074686826  | 7.221886413  |
| ENSG00000204131 | NHSL2         | NHS-like 2 [Source:HGNC Symbol;Acc:33737]                                                                                                   | 1.554888375  | 4.620172576  | 17.44404755 | 2.96E-05 | 0.000562767 | 3.298512169  | 3.830594178  | 4.68073531   | 5.351527589  | 5.007010895  |
| ENSG00000238113 | RP11-262H14.1 |                                                                                                                                             | 2.094325404  | 4.197519923  | 17.39949442 | 3.03E-05 | 0.00057549  | 2.695223288  | 3.476530889  | 4.094144628  | 5.425567145  | 3.782605494  |
| ENSG00000211665 | IGLV3-16      | immunoglobulin lambda variable 3-16 [Source:HGNC Symbol;Acc:5901]                                                                           | -3.062810018 | 0.594810574  | 17.39286455 | 3.04E-05 | 0.000576876 | 2.093195522  | 0.904001603  | -2.845623393 | -3.360122781 | -0.147769603 |
| ENSG00000109084 | TMEM97        | transmembrane protein 97 [Source:HGNC Symbol;Acc:28106]                                                                                     | -1.708508372 | 3.053524934  | 17.37125444 | 3.07E-05 | 0.000582843 | 3.780925818  | 3.774274833  | 1.802268781  | 1.567613022  | 2.874258264  |
| ENSG00000059573 | ALDH18A1      | aldehyde dehydrogenase 18 family, member A1 [Source:HGNC Symbol;Acc:9722]                                                                   | -1.507772031 | 5.633145823  | 17.3467032  | 3.11E-05 | 0.000589784 | 6.260024507  | 6.294656685  | 5.178645532  | 4.046271435  | 5.321115655  |
| ENSG00000250510 | GPR162        | G protein-coupled receptor 162 [Source:HGNC Symbol;Acc:16693]                                                                               | 2.376462237  | 3.892439641  | 17.31813031 | 3.16E-05 | 0.000598073 | 1.546924617  | 2.671789775  | 3.242232575  | 4.976471071  | 4.569109895  |
| ENSG00000184113 | CLDN5         | claudin 5 [Source:HGNC Symbol;Acc:2047]                                                                                                     | 3.032165627  | 1.390282936  | 17.28661635 | 3.21E-05 | 0.00060742  | -0.856736938 | 0.171040209  | 0.538319988  | 2.848906753  | 1.298855074  |
| ENSG00000105270 | CLIP3         | CAP-GLY domain containing linker protein 3 [Source:HGNC Symbol;Acc:24314]                                                                   | 2.23842148   | 0.625993489  | 17.25966978 | 3.26E-05 | 0.000615433 | -0.046168491 | -0.30308518  | 0.805492218  | 1.048430793  | 0.898226269  |
| ENSG00000173559 | NABP1         | nucleic acid binding protein 1 [Source:HGNC Symbol;Acc:26232]                                                                               | 1.467244738  | 6.030108833  | 17.25196877 | 3.27E-05 | 0.000617269 | 5.113748858  | 5.076838692  | 6.060680796  | 6.612289061  | 6.54744251   |
| ENSG00000137168 | PP1L1         | peptidylprolyl isomerase (cyclophilin)-like 1 [Source:HGNC Symbol;Acc:9260]                                                                 | -1.619546852 | 4.169678348  | 17.24940671 | 3.28E-05 | 0.000617439 | 5.001408664  | 4.817053504  | 3.5025636    | 2.460063232  | 3.659358136  |
| ENSG00000166523 | CLEC4E        | C-type lectin domain family 4, member E [Source:HGNC Symbol;Acc:14555]                                                                      | 1.864982124  | 5.11309732   | 17.24522247 | 3.29E-05 | 0.000618137 | 3.424338996  | 4.180008374  | 4.838040135  | 5.972180623  | 5.715301268  |
| ENSG00000236537 | RP11-732M18.3 |                                                                                                                                             | 2.334118139  | -0.009812258 | 17.2293268  | 3.31E-05 | 0.000622663 | -0.698419327 | -1.014020025 | 0.125863448  | 0.154058352  | 0.485200289  |
| ENSG00000166527 | CLEC4D        | C-type lectin domain family 4, member D [Source:HGNC Symbol;Acc:14554]                                                                      | 2.19428068   | 4.012347985  | 17.18905218 | 3.38E-05 | 0.000635324 | 2.463579632  | 2.796091168  | 3.442840456  | 5.043320185  | 4.591098498  |
| ENSG00000105011 | ASF1B         | anti-silencing function 1B histone chaperone [Source:HGNC Symbol;Acc:20996]                                                                 | -1.543254389 | 4.039627094  | 17.17792629 | 3.40E-05 | 0.000638373 | 4.476647738  | 4.637610028  | 2.650340322  | 2.749909693  | 4.445086256  |

|                 |               |                                                                                                 |              |              |             |          |             |              |              |              |              |              |
|-----------------|---------------|-------------------------------------------------------------------------------------------------|--------------|--------------|-------------|----------|-------------|--------------|--------------|--------------|--------------|--------------|
| ENSG00000168393 | DTYMK         | deoxythymidylate kinase (thymidylate kinase) [Source:HGNC Symbol;Acc:3061]                      | -1.49446564  | 4.480325237  | 17.16597028 | 3.43E-05 | 0.000641034 | 5.252314135  | 5.053365096  | 3.799846468  | 3.130496995  | 4.113376315  |
| ENSG00000255328 | RP11-326C3.12 |                                                                                                 | 2.322498046  | -0.128330922 | 17.16696589 | 3.42E-05 | 0.000641034 | -0.775407551 | -0.932821174 | 0.471574783  | 0.669468625  | -2.274700861 |
| ENSG00000170779 | CDC4A         | cell division cycle associated 4 [Source:HGNC Symbol;Acc:14625]                                 | -1.373550487 | 4.863584795  | 17.14149086 | 3.47E-05 | 0.000647967 | 5.464934547  | 5.485959793  | 4.153899108  | 3.774480849  | 4.632168294  |
| ENSG00000273272 | CTA-384D8.34  |                                                                                                 | 3.564418676  | 0.688193084  | 17.14285462 | 3.47E-05 | 0.000647967 | -1.47369337  | -1.191564836 | -1.438615935 | 1.992567844  | 1.3928929    |
| ENSG00000253981 | ALG1L13P      | asparagine-linked glycosylation 1-like 13, pseudogene [Source:HGNC Symbol;Acc:44382]            | 2.700102379  | 0.106960636  | 17.12846018 | 3.49E-05 | 0.000651734 | -0.942926472 | -1.014020025 | -0.99931534  | 1.12943269   | 0.485200289  |
| ENSG00000165959 | CLMN          | calmin (calponin-like, transmembrane) [Source:HGNC Symbol;Acc:19972]                            | 2.054668241  | 5.122079124  | 17.12033392 | 3.51E-05 | 0.000653834 | 3.733087128  | 3.590786525  | 4.426992082  | 6.298184651  | 5.593838124  |
| ENSG00000212127 | TAS2R14       | taste receptor, type 2, member 14 [Source:HGNC Symbol;Acc:14920]                                | 2.292316043  | -0.173354284 | 17.07084044 | 3.60E-05 | 0.000670385 | -0.942926472 | -0.713501401 | 0.28980717   | 0.229488395  | -0.649489103 |
| ENSG00000164104 | HMG82         | high mobility group box 2 [Source:HGNC Symbol;Acc:5000]                                         | -1.527980374 | 7.125228825  | 17.06278705 | 3.62E-05 | 0.000672521 | 7.59781201   | 7.694043382  | 6.468919368  | 5.938858325  | 7.199940107  |
| ENSG00000137266 | SLC22A23      | solute carrier family 22, member 23 [Source:HGNC Symbol;Acc:21106]                              | -1.701915111 | 3.816725701  | 17.04648162 | 3.65E-05 | 0.000677602 | 4.449416135  | 4.72152329   | 3.133097051  | 2.086853261  | 3.152175675  |
| ENSG00000169515 | CCDC8         | coiled-coil domain containing 8 [Source:HGNC Symbol;Acc:25367]                                  | -8.089704138 | -0.22944329  | 17.00804088 | 3.72E-05 | 0.000690729 | 1.127895066  | 0.277241192  | -7.002070102 | -7.002070102 | -0.80787826  |
| ENSG00000184497 | TMEM255B      | transmembrane protein 255B [Source:HGNC Symbol;Acc:28297]                                       | 2.731091691  | -0.220163459 | 16.99196363 | 3.75E-05 | 0.000695867 | -1.756270337 | -0.713501401 | -1.202308962 | 0.58582888   | 0.223773082  |
| ENSG00000241566 | IGKV2D-24     | immunoglobulin kappa variable 2D-24 (non-functional) [Source:HGNC Symbol;Acc:5797]              | -3.093789355 | 0.684778121  | 16.98207835 | 3.77E-05 | 0.000698762 | 2.187493018  | 0.904001603  | -2.073364206 | -4.730697034 | 0.095393329  |
| ENSG00000189316 | RP11-797H7.5  |                                                                                                 | -3.370203382 | 0.325315861  | 16.95564376 | 3.83E-05 | 0.000707812 | 1.806678074  | 0.925936776  | -7.002070102 | -2.97427061  | -1.18885156  |
| ENSG00000189127 | ANKRD34B      | ankyrin repeat domain 34B [Source:HGNC Symbol;Acc:33736]                                        | 2.338323989  | -0.003600961 | 16.94081057 | 3.86E-05 | 0.000712614 | -0.425964666 | -0.855949929 | 0.365283811  | 0.696304622  | -0.9858258   |
| ENSG00000151948 | GLT1D1        | glycosyltransferase 1 domain containing 1 [Source:HGNC Symbol;Acc:26483]                        | 1.870982414  | 5.652804699  | 16.93213795 | 3.87E-05 | 0.000715124 | 4.099324826  | 4.560832138  | 5.12807726   | 6.723686917  | 6.126640144  |
| ENSG00000272053 | RP11-367G6.3  |                                                                                                 | 1.942652143  | 2.671667741  | 16.92249411 | 3.89E-05 | 0.000718011 | 1.832851647  | 1.660530868  | 2.867077005  | 3.497693538  | 2.648857997  |
| ENSG00000105767 | CADM4         | cell adhesion molecule 4 [Source:HGNC Symbol;Acc:30825]                                         | 2.303773488  | 0.410871289  | 16.89779405 | 3.94E-05 | 0.000726652 | -0.856736938 | 0.016063025  | 0.471574783  | 0.894716898  | 0.646616095  |
| ENSG00000262944 | RP11-473I1.9  |                                                                                                 | 1.537675044  | 5.388163893  | 16.89274125 | 3.96E-05 | 0.000727825 | 4.557351498  | 4.662320742  | 5.486054045  | 6.275562429  | 5.246248345  |
| ENSG00000079308 | TNS1          | tensin 1 [Source:HGNC Symbol;Acc:11973]                                                         | -2.035912801 | 4.71434713   | 16.88624234 | 3.97E-05 | 0.000729556 | 4.922864659  | 5.880018163  | 2.253389193  | 3.938003897  | 4.431855191  |
| ENSG00000213876 | RPL7AP64      | ribosomal protein L7a pseudogene 64 [Source:HGNC Symbol;Acc:35821]                              | 2.34380476   | 2.617006297  | 16.87148994 | 4.00E-05 | 0.00073448  | 0.796654307  | 1.647388141  | 2.150470541  | 3.520398046  | 3.265899528  |
| ENSG00000137210 | TMEM14B       | transmembrane protein 14B [Source:HGNC Symbol;Acc:21384]                                        | -1.386754391 | 5.194221186  | 16.86721186 | 4.01E-05 | 0.0007346   | 5.913510612  | 5.815385668  | 4.628078944  | 4.156672678  | 4.561030213  |
| ENSG00000074964 | ARHGEF10L     | Rho guanine nucleotide exchange factor (GEF) 10-like [Source:HGNC Symbol;Acc:25540]             | 1.943318616  | 5.076875826  | 16.86728989 | 4.01E-05 | 0.0007346   | 3.008216069  | 4.277066647  | 4.842999345  | 6.135513082  | 5.393426727  |
| ENSG00000116062 | MSH6          | mutS homolog 6 [Source:HGNC Symbol;Acc:7329]                                                    | -1.37262096  | 5.84695732   | 16.85947623 | 4.03E-05 | 0.000736064 | 6.350560454  | 6.371097946  | 5.289363194  | 4.701415938  | 5.858153151  |
| ENSG00000205085 | FAM71F2       | family with sequence similarity 71, member F2 [Source:HGNC Symbol;Acc:27998]                    | 2.704235493  | 0.015327786  | 16.86061976 | 4.02E-05 | 0.000736064 | -1.921450438 | -0.355038393 | -0.453950945 | 0.962608982  | 0.04992943   |
| ENSG00000170190 | SLC16A5       | solute carrier family 16 (monocarboxylate transporter), member 5 [Source:HGNC Symbol;Acc:10926] | 1.545846953  | 4.681785177  | 16.84872421 | 4.05E-05 | 0.000739475 | 3.650879106  | 4.056192383  | 4.789201202  | 5.461209116  | 4.76295413   |
| ENSG00000197558 | SSPO          | SCO-spondin [Source:HGNC Symbol;Acc:21998]                                                      | 2.037443077  | 2.276877246  | 16.82798498 | 4.09E-05 | 0.000746823 | 1.040754067  | 1.724506406  | 2.456873398  | 3.20713662   | 1.945725455  |
| ENSG00000136867 | SLC31A2       | solute carrier family 31 (copper transporter), member 2 [Source:HGNC Symbol;Acc:11017]          | 2.036237704  | 5.545713858  | 16.80884686 | 4.13E-05 | 0.000753609 | 3.875243923  | 4.447875012  | 4.946464078  | 6.71304952   | 5.931278265  |
| ENSG00000169085 | C8orf46       | chromosome 8 open reading frame 46 [Source:HGNC Symbol;Acc:28498]                               | 2.288592547  | 0.068157219  | 16.79452209 | 4.17E-05 | 0.000758532 | -1.034594152 | -0.204475541 | 0.28980717   | 0.402426505  | 0.095393329  |
| ENSG00000111275 | ALDH2         | aldehyde dehydrogenase 2 family (mitochondrial) [Source:HGNC Symbol;Acc:404]                    | 1.741743625  | 6.509138819  | 16.76107164 | 4.24E-05 | 0.000771222 | 5.032796296  | 5.661281456  | 6.302481455  | 7.518773637  | 6.774483969  |
| ENSG00000237491 | RP11-206L10.9 |                                                                                                 | 2.347100164  | 0.40930636   | 16.74553163 | 4.27E-05 | 0.00077676  | -0.046168491 | -0.583862591 | 0.75024962   | 0.894716898  | 0.264147325  |
| ENSG00000106976 | DNM1          | dynamitin 1 [Source:HGNC Symbol;Acc:2972]                                                       | 2.20934842   | 1.930053838  | 16.72619191 | 4.32E-05 | 0.000783907 | 0.401371743  | 1.434365866  | 2.051115931  | 2.697741416  | 2.041752268  |
| ENSG00000149503 | INCENP        | inner centromere protein antigens 135/155kDa [Source:HGNC Symbol;Acc:6058]                      | -1.376606523 | 4.830962982  | 16.71463526 | 4.34E-05 | 0.000787881 | 5.449158537  | 5.360703406  | 4.051935967  | 3.579252501  | 4.843435205  |
| ENSG00000162543 | UBXN10        | UBX domain protein 10 [Source:HGNC Symbol;Acc:26354]                                            | -1.762725771 | 2.970510757  | 16.69935724 | 4.38E-05 | 0.000792387 | 3.951879815  | 3.641380386  | 2.073793572  | 1.168289627  | 2.164148811  |
| ENSG00000139318 | DUSP6         | dual specificity phosphatase 6 [Source:HGNC Symbol;Acc:3072]                                    | 1.810521733  | 7.67343262   | 16.70082462 | 4.38E-05 | 0.000792387 | 5.840407077  | 6.477503674  | 7.50502584   | 8.487755024  | 8.381196346  |

|                 |               |                                                                                                                                                                            |              |              |             |          |             |              |              |              |              |              |
|-----------------|---------------|----------------------------------------------------------------------------------------------------------------------------------------------------------------------------|--------------|--------------|-------------|----------|-------------|--------------|--------------|--------------|--------------|--------------|
| ENSG00000198121 | LPAR1         | lysophosphatidic acid receptor 1 [Source:HGNC Symbol;Acc:3166]                                                                                                             | 2.601012818  | 2.661408141  | 16.69794669 | 4.38E-05 | 0.000792387 | 0.769809504  | 1.272590116  | 1.613958159  | 3.865963837  | 3.260920169  |
| ENSG00000124731 | TREM1         | triggering receptor expressed on myeloid cells 1 [Source:HGNC Symbol;Acc:17760]                                                                                            | 2.657101643  | 6.449345854  | 16.68000471 | 4.42E-05 | 0.000799094 | 4.366735481  | 4.507278613  | 4.960222513  | 7.805639866  | 7.112807219  |
| ENSG00000104093 | DMXL2         | Dmx-like 2 [Source:HGNC Symbol;Acc:2938]                                                                                                                                   | 1.982681764  | 7.327144822  | 16.67467645 | 4.44E-05 | 0.000800518 | 5.212995974  | 6.32024472   | 7.112173624  | 8.420819471  | 7.676397272  |
| ENSG00000005189 | AC004381.6    | Putative RNA exonuclease NEF-sp [Source:UniProtKB/Swiss-Prot;Acc:Q96IC2]                                                                                                   | -1.882609698 | 2.621978488  | 16.66296301 | 4.46E-05 | 0.000804649 | 3.479226043  | 3.315529363  | 0.401591237  | 0.962608982  | 2.610226292  |
| ENSG00000161911 | TREML1        | triggering receptor expressed on myeloid cells-like 1 [Source:HGNC Symbol;Acc:20434]                                                                                       | 2.001483449  | 4.269141775  | 16.64591498 | 4.50E-05 | 0.00081025  | 2.038016118  | 3.411939754  | 4.175028678  | 5.127069289  | 4.826683557  |
| ENSG00000115155 | OTOF          | otofelin [Source:HGNC Symbol;Acc:8515]                                                                                                                                     | 2.27391729   | 0.295090576  | 16.64781036 | 4.50E-05 | 0.00081025  | -0.856736938 | 0.016063025  | 0.983710868  | 0.335717742  | 0.095393329  |
| ENSG00000135709 | KIAA0513      | KIAA0513 [Source:HGNC Symbol;Acc:29058]                                                                                                                                    | 1.641144877  | 6.776067954  | 16.62590072 | 4.55E-05 | 0.000818007 | 5.389790814  | 5.938510869  | 6.646769245  | 7.780387605  | 6.958738962  |
| ENSG00000138798 | EGF           | epidermal growth factor [Source:HGNC Symbol;Acc:3229]                                                                                                                      | 2.513966276  | 2.404509516  | 16.5643215  | 4.70E-05 | 0.000844138 | 0.046214424  | 1.464652754  | 2.073793572  | 3.284338193  | 3.080504462  |
| ENSG00000225101 | ORS2K3P       | olfactory receptor, family 52, subfamily K, member 3 pseudogene [Source:HGNC Symbol;Acc:15224]                                                                             | 2.854062136  | 2.403576574  | 16.55515495 | 4.73E-05 | 0.000847362 | -0.094677427 | 1.010487126  | 1.245796404  | 3.524147633  | 3.225574983  |
| ENSG00000254017 | IGHEP2        | immunoglobulin heavy constant epsilon P2 (pseudogene) [Source:HGNC Symbol;Acc:5524]                                                                                        | 3.519050424  | 0.962761299  | 16.54817548 | 4.74E-05 | 0.000849619 | -0.555769858 | -1.289265519 | -1.097244829 | 2.483362921  | 1.198257616  |
| ENSG00000244482 | LILRA6        | leukocyte immunoglobulin-like receptor, subfamily A (with TM domain), member 6 [Source:HGNC Symbol;Acc:15495]                                                              | 1.916097381  | 6.367768435  | 16.51352267 | 4.83E-05 | 0.000864406 | 4.652269455  | 5.522410173  | 6.05071266   | 7.500808448  | 6.55610665   |
| ENSG00000141497 | ZMYND15       | zinc finger, MYND-type containing 15 [Source:HGNC Symbol;Acc:20997]                                                                                                        | 1.985010667  | 2.229573032  | 16.47335807 | 4.93E-05 | 0.000882014 | 0.823008709  | 1.579816252  | 2.650340322  | 3.105687454  | 1.81594051   |
| ENSG00000100292 | HMOX1         | heme oxygenase (decycling) 1 [Source:HGNC Symbol;Acc:5013]                                                                                                                 | 1.513303236  | 6.272193368  | 16.47059839 | 4.94E-05 | 0.0008824   | 5.10168997   | 5.422763437  | 6.225453304  | 7.080151331  | 6.626514479  |
| ENSG00000154146 | NRGN          | neurogranin (protein kinase C substrate, RC3) [Source:HGNC Symbol;Acc:8000]                                                                                                | 1.955781251  | 7.296979618  | 16.4502512  | 4.99E-05 | 0.000891016 | 5.253525726  | 6.100977991  | 6.902518994  | 8.345602691  | 7.87215837   |
| ENSG00000181938 | GINS3         | GINS complex subunit 3 (PsF3 homolog) [Source:HGNC Symbol;Acc:25851]                                                                                                       | -1.764564593 | 2.657902903  | 16.43232883 | 5.04E-05 | 0.000898566 | 3.371751013  | 3.344320706  | 0.959559782  | 1.006157955  | 2.765955603  |
| ENSG00000114346 | ECT2          | epithelial cell transforming sequence 2 oncogene [Source:HGNC Symbol;Acc:3155]                                                                                             | -1.697188308 | 3.874582132  | 16.422239   | 5.07E-05 | 0.000902445 | 4.597980204  | 4.468572057  | 2.243421497  | 2.737043408  | 3.9341793    |
| ENSG00000226046 | AC007316.3    |                                                                                                                                                                            | 1.913019608  | 2.328199481  | 16.41194014 | 5.10E-05 | 0.000906443 | 1.361587606  | 1.634124584  | 2.465474326  | 2.895699157  | 2.633529225  |
| ENSG00000261015 | RP1-90J20.11  |                                                                                                                                                                            | 2.191131795  | 1.099235585  | 16.37433281 | 5.20E-05 | 0.000923499 | -0.555769858 | -0.157588231 | 0.884581662  | 1.381723529  | 2.153441144  |
| ENSG00000207980 | MIR23A        | microRNA 23a [Source:HGNC Symbol;Acc:31605]                                                                                                                                | 3.366518776  | -0.810112641 | 16.37276764 | 5.20E-05 | 0.000923499 | -2.322346157 | -7.002070102 | -2.845623393 | 0.192266291  | 0.139468177  |
| ENSG00000008516 | MMP25         | matrix metalloproteinase 25 [Source:HGNC Symbol;Acc:14246]                                                                                                                 | 2.202812023  | 6.193616418  | 16.35573848 | 5.25E-05 | 0.000930893 | 4.659599832  | 4.083285021  | 5.132134572  | 7.160342999  | 7.183587426  |
| ENSG00000183773 | AIFM3         | apoptosis-inducing factor, mitochondrion-associated, 3 [Source:HGNC Symbol;Acc:26398]                                                                                      | 2.053945206  | 3.399279123  | 16.35339982 | 5.26E-05 | 0.000931102 | 1.819824215  | 2.612158157  | 3.201624573  | 4.442766639  | 3.569583953  |
| ENSG00000198039 | ZNF273        | zinc finger protein 273 [Source:HGNC Symbol;Acc:13067]                                                                                                                     | -1.662721631 | 3.871503624  | 16.34973056 | 5.27E-05 | 0.000931545 | 4.668710735  | 4.630948391  | 3.186096972  | 1.981700954  | 3.265899528  |
| ENSG00000112902 | SEMA5A        | sema domain, seven thrombospondin repeats (type 1 and type 1-like), transmembrane domain (TM) and short cytoplasmic domain, (semaphorin) 5A [Source:HGNC Symbol;Acc:10736] | 2.299333112  | 0.408837131  | 16.34867671 | 5.27E-05 | 0.000931545 | -1.132483902 | -0.408932621 | 0.471574783  | 0.962608982  | 0.872340852  |
| ENSG00000261356 | RP11-46D6.5   |                                                                                                                                                                            | 1.776295991  | 3.419687103  | 16.32888272 | 5.32E-05 | 0.000940379 | 2.146341971  | 2.66528446   | 3.29626549   | 3.886500298  | 4.159591272  |
| ENSG00000121957 | GPSM2         | G-protein signaling modulator 2 [Source:HGNC Symbol;Acc:29501]                                                                                                             | -1.797604894 | 3.858577692  | 16.32649204 | 5.33E-05 | 0.00094062  | 4.484924323  | 4.474165552  | 1.629349082  | 2.622783341  | 4.199174923  |
| ENSG00000105520 | DKFZP761J1410 | Lipid phosphate phosphatase-related protein type 2 [Source:UniProtKB/Swiss-Prot;Acc:Q96GM1]                                                                                | 1.559820134  | 5.712822866  | 16.30709834 | 5.39E-05 | 0.000949341 | 4.440932708  | 4.977939425  | 5.663796734  | 6.594120875  | 5.940650325  |
| ENSG00000219088 | RP3-359N14.1  |                                                                                                                                                                            | -2.030971026 | 1.642614869  | 16.30171967 | 5.40E-05 | 0.000950842 | 2.504862786  | 2.361613919  | -0.329705368 | -0.296766077 | 1.531661491  |
| ENSG00000174125 | TLR1          | toll-like receptor 1 [Source:HGNC Symbol;Acc:11847]                                                                                                                        | 1.622149767  | 5.917028912  | 16.30030448 | 5.41E-05 | 0.000950842 | 4.505410405  | 4.929901731  | 5.554165184  | 6.580230437  | 6.727880313  |
| ENSG00000111442 | METAP2        | methionyl aminopeptidase 2 [Source:HGNC Symbol;Acc:16672]                                                                                                                  | -1.307536487 | 6.136774894  | 16.29734171 | 5.41E-05 | 0.000951376 | 6.716179048  | 6.772041963  | 5.56621082   | 5.174364615  | 5.744133867  |
| ENSG00000082397 | EPB41L3       | erythrocyte membrane protein band 4.1-like 3 [Source:HGNC Symbol;Acc:3380]                                                                                                 | 1.598212537  | 5.109146108  | 16.2580158  | 5.53E-05 | 0.000969711 | 3.628640226  | 4.50181228   | 5.231288657  | 5.922614461  | 5.287231979  |
| ENSG00000197852 | FAM212B       | family with sequence similarity 212, member B [Source:HGNC Symbol;Acc:28045]                                                                                               | 2.289200146  | 4.922409794  | 16.25738294 | 5.53E-05 | 0.000969711 | 3.260449604  | 3.286151722  | 3.853256341  | 6.068406509  | 5.656795653  |
| ENSG00000167261 | DPEP2         | dipeptidase 2 [Source:HGNC Symbol;Acc:23028]                                                                                                                               | 1.371237888  | 6.288956797  | 16.23662201 | 5.59E-05 | 0.000979417 | 5.36309909   | 5.671866971  | 6.571081935  | 7.070247415  | 6.11012241   |
| ENSG00000258734 | RP11-112J1.3  |                                                                                                                                                                            | -3.00667232  | 0.194509381  | 16.18889054 | 5.73E-05 | 0.001003092 | 1.268770164  | 1.237938318  | -7.002070102 | -2.670141381 | -1.083770229 |

|                 |               |                                                                                                                  |              |              |             |          |             |              |              |              |              |              |
|-----------------|---------------|------------------------------------------------------------------------------------------------------------------|--------------|--------------|-------------|----------|-------------|--------------|--------------|--------------|--------------|--------------|
| ENSG00000263823 | RP11-326K13.4 |                                                                                                                  | 2.213372876  | -0.121648939 | 16.18759677 | 5.74E-05 | 0.001003092 | -0.775407551 | -0.782968247 | 0.570569237  | 0.229488395  | -0.9858258   |
| ENSG00000204103 | MAFB          | v-maf avian musculoaponeurotic fibrosarcoma oncogene homolog B [Source:HGNC Symbol;Acc:6408]                     | 1.858905816  | 6.532016841  | 16.18417977 | 5.75E-05 | 0.001003903 | 5.007166533  | 5.132136233  | 5.840325445  | 7.592724165  | 7.178645258  |
| ENSG00000136108 | CKAP2         | cytoskeleton associated protein 2 [Source:HGNC Symbol;Acc:1990]                                                  | -1.384450713 | 5.197696074  | 16.16783955 | 5.80E-05 | 0.001011594 | 5.70082528   | 5.764556871  | 3.993665308  | 4.199509687  | 5.410390022  |
| ENSG00000253368 | TRNP1         | TMF1-regulated nuclear protein 1 [Source:HGNC Symbol;Acc:34348]                                                  | 2.213573222  | 0.203969049  | 16.16179383 | 5.82E-05 | 0.00101382  | -0.625332215 | -0.583862591 | 0.250534523  | 0.669468625  | 0.485200289  |
| ENSG00000179869 | ABCA13        | ATP-binding cassette, sub-family A (ABC1), member 13 [Source:HGNC Symbol;Acc:14638]                              | -2.387248586 | 3.544292489  | 16.15062767 | 5.85E-05 | 0.001018803 | 3.650879106  | 1.976501425  | -0.907612816 | 0.61425099   | 5.307898957  |
| ENSG00000102743 | SLC25A15      | solute carrier family 25 (mitochondrial carrier; ornithine transporter) member 15 [Source:HGNC Symbol;Acc:10985] | -1.687306544 | 3.127654011  | 16.1392869  | 5.89E-05 | 0.001023905 | 4.021807945  | 3.810099846  | 2.161099145  | 1.296595379  | 2.633529225  |
| ENSG00000180914 | OXTR          | oxytocin receptor [Source:HGNC Symbol;Acc:8529]                                                                  | 2.178148987  | 0.216773418  | 16.13082131 | 5.91E-05 | 0.001027474 | -0.775407551 | -0.112176905 | 0.505333341  | 0.497040107  | 0.264147325  |
| ENSG00000180061 | TMEM150B      | transmembrane protein 150B [Source:HGNC Symbol;Acc:34415]                                                        | 2.100476422  | 3.228104116  | 16.05080669 | 6.17E-05 | 0.001070757 | 1.608823392  | 2.361613919  | 2.899175647  | 4.238831357  | 3.589580856  |
| ENSG00000134779 | TPGS2         | tubulin polyglutamylase complex subunit 2 [Source:HGNC Symbol;Acc:24561]                                         | -1.286236201 | 6.061499719  | 16.04175031 | 6.20E-05 | 0.001073819 | 6.694039461  | 6.700275842  | 5.514307435  | 5.279040176  | 5.377412319  |
| ENSG00000120949 | TNFRSF8       | tumor necrosis factor receptor superfamily, member 8 [Source:HGNC Symbol;Acc:11923]                              | 2.350527143  | 3.697057899  | 16.04165805 | 6.20E-05 | 0.001073819 | 1.696960037  | 2.584842899  | 2.905510557  | 4.939041784  | 4.099497077  |
| ENSG00000129219 | PLD2          | phospholipase D2 [Source:HGNC Symbol;Acc:9068]                                                                   | 1.4392118    | 4.776228438  | 16.01664098 | 6.28E-05 | 0.001087028 | 3.784282926  | 4.289810032  | 5.022748641  | 5.467064767  | 4.736293913  |
| ENSG00000122863 | CHST3         | carbohydrate (chondroitin 6) sulfotransferase 3 [Source:HGNC Symbol;Acc:1971]                                    | -4.22979662  | -0.289445491 | 15.98980752 | 6.37E-05 | 0.001101458 | 0.874315765  | 0.836121102  | -4.621297774 | -7.002070102 | -3.221241555 |
| ENSG00000149054 | ZNF215        | zinc finger protein 215 [Source:HGNC Symbol;Acc:13007]                                                           | -2.546412419 | 1.354707007  | 15.98687543 | 6.38E-05 | 0.00110208  | 2.5449974    | 1.85599892   | -1.721358966 | -2.97427061  | 1.3928929    |
| ENSG00000104522 | TSTA3         | tissue specific transplantation antigen P35B [Source:HGNC Symbol;Acc:12390]                                      | -1.282679681 | 5.605624038  | 15.98118815 | 6.40E-05 | 0.001104309 | 6.197188107  | 6.147811841  | 5.195546149  | 4.817496626  | 5.089370998  |
| ENSG00000130962 | PRRG1         | proline rich Gla (G-carboxyglutamic acid) 1 [Source:HGNC Symbol;Acc:9469]                                        | 2.244672476  | -0.150784987 | 15.9696464  | 6.44E-05 | 0.00110997  | -0.365194284 | -0.713501401 | 0.036330944  | 0.61425099   | -1.87334355  |
| ENSG00000123095 | BHLHE41       | basic helix-loop-helix family, member e41 [Source:HGNC Symbol;Acc:16617]                                         | -2.080385587 | 1.881858853  | 15.96357573 | 6.46E-05 | 0.001112443 | 3.08644716   | 2.287305009  | 0.036330944  | 0.074465887  | 1.428856327  |
| ENSG00000170893 | TRH           | thyrotropin-releasing hormone [Source:HGNC Symbol;Acc:12298]                                                     | -3.663524958 | 0.455454996  | 15.93918513 | 6.54E-05 | 0.001125765 | 0.742455703  | 1.523383318  | -7.002070102 | -3.888428289 | 0.948644093  |
| ENSG00000182326 | C15           | complement component 1, s subcomponent [Source:HGNC Symbol;Acc:1247]                                             | -2.119155293 | 1.767290866  | 15.93224045 | 6.57E-05 | 0.00112876  | 3.091876065  | 2.549955088  | -0.010608983 | -0.589083246 | -0.57637152  |
| ENSG00000101665 | METTL13       | methyltransferase like 13 [Source:HGNC Symbol;Acc:24248]                                                         | -1.328390622 | 5.587477065  | 15.93044741 | 6.57E-05 | 0.00112876  | 6.267240271  | 6.051949372  | 4.994798186  | 4.45852833   | 5.422704219  |
| ENSG00000196664 | TLR7          | toll-like receptor 7 [Source:HGNC Symbol;Acc:15631]                                                              | 1.560397692  | 5.048190009  | 15.92301843 | 6.60E-05 | 0.001130046 | 3.606053165  | 4.33559574   | 4.961743161  | 5.482564629  | 5.83153188   |
| ENSG00000269220 | LINC00528     | long intergenic non-protein coding RNA 528 [Source:HGNC Symbol;Acc:26875]                                        | 1.801831743  | 3.426746986  | 15.92406799 | 6.59E-05 | 0.001130046 | 2.744312733  | 2.270258944  | 3.481516588  | 4.386203812  | 3.305127547  |
| ENSG00000137462 | TLR2          | toll-like receptor 2 [Source:HGNC Symbol;Acc:11848]                                                              | 2.021788213  | 6.975346138  | 15.9227446  | 6.60E-05 | 0.001130046 | 5.078633344  | 5.83652954   | 6.482754511  | 8.00528999   | 7.581732434  |
| ENSG00000180891 | CUEDC1        | CUE domain containing 1 [Source:HGNC Symbol;Acc:31350]                                                           | 1.961496506  | 4.069412988  | 15.8888201  | 6.72E-05 | 0.001148355 | 2.521050858  | 3.129558609  | 3.66819303   | 5.156357122  | 4.377683051  |
| ENSG00000197046 | SIGLEC15      | sialic acid binding Ig-like lectin 15 [Source:HGNC Symbol;Acc:27596]                                             | 2.43470737   | 1.685873338  | 15.88863673 | 6.72E-05 | 0.001148355 | -0.306880589 | 1.010487126  | 1.534439871  | 2.428399826  | 2.236956541  |
| ENSG00000231419 | LINC00689     | long intergenic non-protein coding RNA 689 [Source:HGNC Symbol;Acc:27217]                                        | 2.402439952  | 0.543308532  | 15.87121268 | 6.78E-05 | 0.001157849 | 0.174562846  | -0.025429826 | 0.328039018  | 1.844482366  | -7.002070102 |
| ENSG00000183696 | UPP1          | uridine phosphorylase 1 [Source:HGNC Symbol;Acc:12576]                                                           | 1.284356456  | 6.092062498  | 15.86586312 | 6.80E-05 | 0.001159998 | 5.257154408  | 5.608852542  | 6.605049683  | 6.631969868  | 5.839068896  |
| ENSG00000114013 | CD86          | CD86 molecule [Source:HGNC Symbol;Acc:1705]                                                                      | 1.638760754  | 6.51675101   | 15.85329834 | 6.84E-05 | 0.001166592 | 5.048237693  | 5.780445976  | 6.39430624   | 7.381088304  | 6.891061537  |
| ENSG00000153823 | PID1          | phosphotyrosine interaction domain containing 1 [Source:HGNC Symbol;Acc:26084]                                   | 1.558893411  | 3.993110112  | 15.84762618 | 6.87E-05 | 0.001168959 | 2.695223288  | 3.465340561  | 4.55339651   | 4.485703603  | 3.995418829  |
| ENSG00000105472 | CLEC11A       | C-type lectin domain family 11, member A [Source:HGNC Symbol;Acc:10576]                                          | -1.692648489 | 3.991557203  | 15.84480945 | 6.88E-05 | 0.001169566 | 4.240439676  | 4.479737444  | 2.02807612   | 2.830854872  | 4.747017192  |
| ENSG00000133808 | MICALCL       | MICAL C-terminal like [Source:HGNC Symbol;Acc:25933]                                                             | 2.303878288  | 2.071787816  | 15.8418715  | 6.89E-05 | 0.001170249 | 0.435934254  | 1.109650305  | 1.517996407  | 2.958271065  | 2.723150012  |
| ENSG00000172322 | CLEC12A       | C-type lectin domain family 12, member A [Source:HGNC Symbol;Acc:31713]                                          | 1.693966321  | 6.433575953  | 15.83378375 | 6.92E-05 | 0.001174125 | 4.913697322  | 5.601204704  | 6.171936119  | 7.239735604  | 7.022280309  |
| ENSG00000224307 | RP11-344B5.2  |                                                                                                                  | 2.548418853  | 2.114079852  | 15.82836178 | 6.94E-05 | 0.001176356 | 0.000762307  | 0.637745977  | 1.098750223  | 3.080443796  | 3.04038489   |
| ENSG00000228974 | AC006483.5    |                                                                                                                  | 1.622431791  | 4.366689869  | 15.8183269  | 6.97E-05 | 0.00118147  | 3.181172573  | 3.93162677   | 4.44232286   | 5.087070373  | 4.511578169  |



|                 |               |                                                                                                  |              |              |             |          |             |              |              |              |              |              |
|-----------------|---------------|--------------------------------------------------------------------------------------------------|--------------|--------------|-------------|----------|-------------|--------------|--------------|--------------|--------------|--------------|
| ENSG00000205730 | ITPRIPL2      | inositol 1,4,5-trisphosphate receptor interacting protein-like 2 [Source:HGNC Symbol;Acc:27257]  | 1.615187314  | 3.485102364  | 15.81374921 | 6.99E-05 | 0.00118205  | 2.156740297  | 2.69752161   | 3.72302193   | 3.926716498  | 4.033874407  |
| ENSG00000160013 | PTGIR         | prostaglandin I2 (prostacyclin) receptor (IP) [Source:HGNC Symbol;Acc:9602]                      | 1.902655813  | 3.647162487  | 15.81456675 | 6.99E-05 | 0.00118205  | 1.79341104   | 3.091246938  | 4.011394951  | 4.504805816  | 3.528738911  |
| ENSG00000216490 | IFI30         | interferon, gamma-inducible protein 30 [Source:HGNC Symbol;Acc:5398]                             | 3.146234071  | 3.975290895  | 15.80698971 | 7.01E-05 | 0.001185138 | 2.227502762  | 1.565913615  | 2.139763053  | 5.791861012  | 3.439004866  |
| ENSG00000147894 | C9orf72       | chromosome 9 open reading frame 72 [Source:HGNC Symbol;Acc:28337]                                | 1.795105932  | 6.849263559  | 15.7890401  | 7.08E-05 | 0.001195285 | 5.373166446  | 5.983655362  | 6.594305985  | 7.857087322  | 7.160043447  |
| ENSG00000135525 | MAP7          | microtubule-associated protein 7 [Source:HGNC Symbol;Acc:6869]                                   | -1.718493081 | 2.913288376  | 15.76316191 | 7.18E-05 | 0.001210583 | 3.606053165  | 3.545455828  | 1.120696904  | 1.610570062  | 3.05196192   |
| ENSG00000134817 | APLNR         | apelin receptor [Source:HGNC Symbol;Acc:339]                                                     | -7.86163599  | -0.527308718 | 15.75746337 | 7.20E-05 | 0.001212355 | 0.742455703  | 0.277241192  | -7.002070102 | -7.002070102 | -1.87334355  |
| ENSG00000174705 | SH3PXD2B      | SH3 and PX domains 2B [Source:HGNC Symbol;Acc:29242]                                             | 2.47837621   | 1.457315713  | 15.75676295 | 7.20E-05 | 0.001212355 | -0.555769858 | 0.376157587  | -0.059127673 | 2.126858114  | 2.625803327  |
| ENSG00000187164 | KIAA1598      | KIAA1598 [Source:HGNC Symbol;Acc:29319]                                                          | 1.626347522  | 5.333815851  | 15.75136325 | 7.22E-05 | 0.001214656 | 3.903304094  | 4.699407071  | 5.339352777  | 6.280558759  | 5.399103349  |
| ENSG00000269600 | ACD16629.3    |                                                                                                  | -7.810534268 | -0.530220459 | 15.74933686 | 7.23E-05 | 0.001214794 | 0.848890306  | 0.343933181  | -7.002070102 | -7.002070102 | -3.754655114 |
| ENSG00000120885 | CLU           | clusterin [Source:HGNC Symbol;Acc:2095]                                                          | 1.823109963  | 6.635325167  | 15.7283284  | 7.31E-05 | 0.001227186 | 4.934997859  | 5.482263587  | 6.05071266   | 7.535357162  | 7.406814325  |
| ENSG00000132122 | SPATA6        | spermatogenesis associated 6 [Source:HGNC Symbol;Acc:18309]                                      | 1.930727024  | 2.968459622  | 15.72084101 | 7.34E-05 | 0.001230876 | 1.46561866   | 2.181869923  | 2.886421762  | 3.868915576  | 3.255923565  |
| ENSG00000068489 | PRR11         | proline rich 11 [Source:HGNC Symbol;Acc:25619]                                                   | -1.572560137 | 4.479538181  | 15.70485137 | 7.40E-05 | 0.001240141 | 5.138880244  | 5.078063628  | 2.860570679  | 3.568398624  | 4.530321888  |
| ENSG00000129009 | ISLR          | immunoglobulin superfamily containing leucine-rich repeat [Source:HGNC Symbol;Acc:6133]          | -7.695077952 | -0.625149325 | 15.69418519 | 7.45E-05 | 0.001244969 | 0.657137645  | 0.343933181  | -7.002070102 | -7.002070102 | -3.754655114 |
| ENSG00000169184 | MN1           | meningioma (disrupted in balanced translocation) 1 [Source:HGNC Symbol;Acc:7180]                 | 2.299201418  | 0.31122283   | 15.69389625 | 7.45E-05 | 0.001244969 | -0.365194284 | -1.014020025 | -0.271377577 | 0.61425099   | 1.218946104  |
| ENSG00000235105 | RP11-329A14.1 |                                                                                                  | -1.363238388 | 4.56102153   | 15.68251406 | 7.49E-05 | 0.001251258 | 5.121732481  | 5.253112255  | 3.836777169  | 3.301918251  | 4.36613654   |
| ENSG00000137393 | RNF144B       | ring finger protein 144B [Source:HGNC Symbol;Acc:21578]                                          | 1.743962119  | 5.423714901  | 15.68076658 | 7.50E-05 | 0.001251258 | 4.297940103  | 4.620897903  | 5.195546149  | 6.530299841  | 5.356557658  |
| ENSG00000271178 | IGHV3OR16-13  | immunoglobulin heavy variable 3/OR16-13 (non-functional) [Source:HGNC Symbol;Acc:5637]           | -4.301429769 | -0.147688753 | 15.67431513 | 7.52E-05 | 0.001254341 | 1.343495699  | 0.310972527  | -4.621297774 | -7.002070102 | -1.3021922   |
| ENSG00000156273 | BACH1         | BTB and CNC homology 1, basic leucine zipper transcription factor 1 [Source:HGNC Symbol;Acc:935] | 1.536719232  | 6.809568667  | 15.66982248 | 7.54E-05 | 0.001256131 | 5.409490446  | 5.901626523  | 6.757284464  | 7.830836215  | 6.935879984  |
| ENSG00000164047 | CAMP          | cathelicidin antimicrobial peptide [Source:HGNC Symbol;Acc:1472]                                 | -3.274684894 | 3.04624742   | 15.65640019 | 7.60E-05 | 0.001262355 | 4.743052439  | 1.749322856  | -1.315629595 | 0.696304622  | 3.157544141  |
| ENSG00000166046 | TCP11L2       | t-complex 11, testis-specific-like 2 [Source:HGNC Symbol;Acc:28627]                              | 1.306436052  | 4.952297892  | 15.65629847 | 7.60E-05 | 0.001262355 | 4.133946251  | 4.516343393  | 5.512233461  | 5.260053564  | 4.91332993   |
| ENSG00000085514 | PILRA         | paired immunoglobulin-like type 2 receptor alpha [Source:HGNC Symbol;Acc:20396]                  | 1.5365182    | 6.673005341  | 15.65509902 | 7.60E-05 | 0.001262355 | 5.374280717  | 6.097962036  | 6.788467495  | 7.589819901  | 6.596194734  |
| ENSG00000204136 | GGTA1P        | glycoprotein, alpha-galactosyltransferase 1 pseudogene [Source:HGNC Symbol;Acc:4253]             | 1.965881604  | 3.30171527   | 15.64672873 | 7.63E-05 | 0.001266756 | 1.711139862  | 2.038220677  | 2.672796614  | 3.982290583  | 4.285069672  |
| ENSG00000242498 | C15orf38      | chromosome 15 open reading frame 38 [Source:HGNC Symbol;Acc:28782]                               | 1.88202408   | 3.353770552  | 15.63648297 | 7.68E-05 | 0.001272435 | 2.237334199  | 2.921487006  | 3.622778389  | 4.623161458  | 0.615745481  |
| ENSG00000270346 | RP1-90J20.12  |                                                                                                  | 2.502378824  | 0.029544286  | 15.60704972 | 7.80E-05 | 0.001291176 | -1.608074432 | -0.932821174 | -0.453950945 | 0.642123966  | 0.763888603  |
| ENSG00000177575 | CD163         | CD163 molecule [Source:HGNC Symbol;Acc:1631]                                                     | 1.730922486  | 6.560127283  | 15.59292931 | 7.85E-05 | 0.001299629 | 4.582637211  | 5.64732062   | 6.211460264  | 7.069285353  | 7.5628906    |
| ENSG00000104524 | PYCR1         | pyrroline-5-carboxylate reductase-like [Source:HGNC Symbol;Acc:25846]                            | -1.664054916 | 2.93925165   | 15.55916545 | 8.00E-05 | 0.001321532 | 3.823970458  | 3.559556046  | 1.992811462  | 1.331251704  | 2.487707366  |
| ENSG00000196559 | LINC00610     | long intergenic non-protein coding RNA 610 [Source:HGNC Symbol;Acc:23262]                        | 2.381216437  | 0.579936194  | 15.55776857 | 8.00E-05 | 0.001321532 | -0.555769858 | -0.355038393 | 0.401591237  | 1.706092334  | 0.182236344  |
| ENSG00000141540 | TTYH2         | tweety family member 2 [Source:HGNC Symbol;Acc:13877]                                            | 1.507204371  | 5.337492266  | 15.5410886  | 8.07E-05 | 0.001331991 | 4.215787888  | 4.76780347   | 5.362561955  | 6.196702673  | 5.377412319  |
| ENSG00000128283 | CDC42EP1      | CDC42 effector protein (Rho GTPase binding) 1 [Source:HGNC Symbol;Acc:17014]                     | 2.343017335  | 2.525743486  | 15.53816809 | 8.09E-05 | 0.001332797 | 0.769809504  | 1.387708937  | 1.89432737   | 3.696873774  | 2.906500707  |
| ENSG00000182054 | IDH2          | isocitrate dehydrogenase 2 (NADP+), mitochondrial [Source:HGNC Symbol;Acc:5383]                  | -1.363475023 | 7.007225085  | 15.53100971 | 8.12E-05 | 0.001336323 | 7.46657301   | 7.63201114   | 6.199909595  | 6.277229796  | 6.865456199  |
| ENSG00000262877 | RP11-105B8.4  |                                                                                                  | 2.186483854  | 2.074831979  | 15.52962701 | 8.12E-05 | 0.001336323 | 0.174562846  | 1.387708937  | 2.253389193  | 2.924622147  | 2.226777706  |
| ENSG00000198948 | MFAP3L        | microfibrillar-associated protein 3-like [Source:HGNC Symbol;Acc:29083]                          | 2.069313496  | 3.533298495  | 15.51116758 | 8.20E-05 | 0.001348172 | 2.082327188  | 2.703883491  | 3.201624573  | 4.62141223   | 3.704069251  |

|                 |              |                                                                                                                |              |              |             |          |             |              |              |              |              |              |
|-----------------|--------------|----------------------------------------------------------------------------------------------------------------|--------------|--------------|-------------|----------|-------------|--------------|--------------|--------------|--------------|--------------|
| ENSG00000137872 | SEMA6D       | sema domain, transmembrane domain (TM), and cytoplasmic domain, (semaphorin) 6D [Source:HGNC Symbol;Acc:16770] | -7.61305732  | -0.709542947 | 15.50895    | 8.21E-05 | 0.001348492 | 0.597320328  | 0.242702272  | -7.002070102 | -7.002070102 | -4.610216385 |
| ENSG00000008441 | NFIX         | nuclear factor I/X (CCAAT-binding transcription factor) [Source:HGNC Symbol;Acc:7788]                          | -1.597916281 | 4.437528641  | 15.49916821 | 8.25E-05 | 0.001354222 | 5.070406928  | 5.221313549  | 2.766259878  | 3.758653379  | 4.068484455  |
| ENSG00000100304 | TTL12        | tubulin tyrosine ligase-like family, member 12 [Source:HGNC Symbol;Acc:28974]                                  | -1.259418032 | 5.961893314  | 15.47447791 | 8.36E-05 | 0.001370746 | 6.478860767  | 6.489521302  | 5.214803978  | 5.098432609  | 5.928925706  |
| ENSG00000185842 | DNAH14       | dynein, axonemal, heavy chain 14 [Source:HGNC Symbol;Acc:2945]                                                 | -3.016079878 | 0.133824465  | 15.471322   | 8.38E-05 | 0.001371756 | 1.229903997  | 1.128690501  | -4.621297774 | -3.360122781 | -0.9858258   |
| ENSG00000170456 | DENN5B       | DENN/MADD domain containing 5B [Source:HGNC Symbol;Acc:28338]                                                  | -1.532770171 | 3.852408518  | 15.46792285 | 8.39E-05 | 0.001372944 | 4.613161742  | 4.279198377  | 2.702204734  | 2.697741416  | 3.912116199  |
| ENSG00000104447 | TRPS1        | trichorhinophalangeal syndrome 1 [Source:HGNC Symbol;Acc:12340]                                                | 1.42965905   | 5.071540321  | 15.46213672 | 8.42E-05 | 0.001375872 | 3.881526851  | 4.499985557  | 5.268626356  | 5.889567528  | 5.029144542  |
| ENSG00000186010 | NDUFA13      | NADH dehydrogenase (ubiquinone) 1 alpha subcomplex, 13 [Source:HGNC Symbol;Acc:17194]                          | 2.184635919  | -0.002190016 | 15.45076666 | 8.47E-05 | 0.001382886 | -0.942926472 | -0.157588231 | 0.471574783  | 0.154058352  | -0.316136847 |
| ENSG00000255397 | AC022182.2   |                                                                                                                | -1.28522692  | 5.557333777  | 15.4238649  | 8.59E-05 | 0.001400274 | 6.055727669  | 6.103386224  | 4.9843626    | 4.45656751   | 5.532146371  |
| ENSG00000139970 | RTN1         | reticulin 1 [Source:HGNC Symbol;Acc:10467]                                                                     | 1.613132252  | 5.215602797  | 15.42364006 | 8.59E-05 | 0.001400274 | 3.609842318  | 4.595461025  | 5.25876374   | 6.039879229  | 5.493399508  |
| ENSG00000185215 | TNFAIP2      | tumor necrosis factor, alpha-induced protein 2 [Source:HGNC Symbol;Acc:11895]                                  | 2.336560572  | 8.954436169  | 15.40966515 | 8.65E-05 | 0.001409359 | 6.926769471  | 7.609315131  | 8.55848514   | 10.30838193  | 9.017148667  |
| ENSG00000249795 | RP11-18011.2 |                                                                                                                | 2.185607106  | 4.425535695  | 15.40376742 | 8.68E-05 | 0.001412454 | 3.307872948  | 3.327938933  | 3.64944369   | 5.636853273  | 4.637941118  |
| ENSG00000137634 | NXPE4        | neurexophilin and PC-esterase domain family, member 4 [Source:HGNC Symbol;Acc:23117]                           | -8.130746819 | -0.197583642 | 15.40075872 | 8.70E-05 | 0.001413395 | 1.287817526  | 0.610915408  | -7.002070102 | -7.002070102 | -3.754655114 |
| ENSG00000182118 | FAM89A       | family with sequence similarity 89, member A [Source:HGNC Symbol;Acc:25057]                                    | -1.723274519 | 2.589646932  | 15.39455213 | 8.72E-05 | 0.001414117 | 3.462559037  | 3.221109942  | 1.225685365  | 0.773941511  | 2.435629945  |
| ENSG00000171860 | C3AR1        | complement component 3a receptor 1 [Source:HGNC Symbol;Acc:1319]                                               | 1.770568708  | 4.820252781  | 15.39513131 | 8.72E-05 | 0.001414117 | 3.206417789  | 3.743725731  | 4.278711965  | 5.512129844  | 5.736979558  |
| ENSG00000236438 | FAM157A      | family with sequence similarity 157, member A [Source:HGNC Symbol;Acc:34079]                                   | 2.424143608  | 1.97847816   | 15.39680288 | 8.71E-05 | 0.001414117 | 0.742455703  | 0.527293245  | 1.076464519  | 2.8843467    | 2.772967998  |
| ENSG00000158578 | ALAS2        | aminolevulinatase, delta-, synthase 2 [Source:HGNC Symbol;Acc:397]                                             | -3.436963638 | 6.569769039  | 15.38941099 | 8.75E-05 | 0.001415036 | 7.207151423  | 7.815235762  | 5.134833122  | -0.244792505 | 6.037004484  |
| ENSG00000166451 | CENPN        | centromere protein N [Source:HGNC Symbol;Acc:30873]                                                            | -1.726884178 | 2.788589907  | 15.38809693 | 8.75E-05 | 0.001415036 | 3.669153174  | 3.527634524  | 1.098750223  | 1.39816257   | 2.381602043  |
| ENSG00000134955 | SLC37A2      | solute carrier family 37 (glucose-6-phosphate transporter), member 2 [Source:HGNC Symbol;Acc:20644]            | 1.714540998  | 4.709955548  | 15.39135458 | 8.74E-05 | 0.001415036 | 3.367280913  | 4.117046668  | 4.583339883  | 5.690394499  | 4.769981094  |
| ENSG00000147536 | GIN54        | GIN5 complex subunit 4 (Sld5 homolog) [Source:HGNC Symbol;Acc:28226]                                           | -1.596806599 | 3.226558188  | 15.3845761  | 8.77E-05 | 0.001416371 | 3.912537499  | 3.884797304  | 2.243421497  | 1.446384807  | 3.204982016  |
| ENSG00000204020 | LIPN         | lipase, family member N [Source:HGNC Symbol;Acc:23452]                                                         | 2.017888743  | 2.410202931  | 15.37595101 | 8.81E-05 | 0.001421543 | 1.210071084  | 1.773719635  | 2.540658833  | 3.399046051  | 2.064792492  |
| ENSG00000226818 | SLC6A6P1     | solute carrier family 6, member 6 pseudogene 1 [Source:HGNC Symbol;Acc:11053]                                  | 1.761023513  | 3.07351584   | 15.34313773 | 8.96E-05 | 0.00144382  | 2.103982592  | 2.172725723  | 3.049757403  | 3.863006047  | 3.348020491  |
| ENSG00000111181 | SLC6A12      | solute carrier family 6 (neurotransmitter transporter), member 12 [Source:HGNC Symbol;Acc:11045]               | 2.332333873  | 1.651020338  | 15.34310322 | 8.96E-05 | 0.00144382  | 0.090278201  | 1.128690501  | 1.450281721  | 2.677681489  | 1.596341512  |
| ENSG00000162733 | DDR2         | discoidin domain receptor tyrosine kinase 2 [Source:HGNC Symbol;Acc:2731]                                      | -1.970423561 | 1.713033086  | 15.33700899 | 8.99E-05 | 0.001447157 | 2.824764954  | 2.638965838  | -0.390491059 | 0.03296005   | -0.045536284 |
| ENSG00000164010 | ERMAP        | erythroblast membrane-associated protein (Scianna blood group) [Source:HGNC Symbol;Acc:15743]                  | -1.404391868 | 5.585282152  | 15.33309624 | 9.01E-05 | 0.001448829 | 5.944598765  | 6.439409225  | 4.379997347  | 4.890483788  | 5.353052382  |
| ENSG00000006327 | TNFRSF12A    | tumor necrosis factor receptor superfamily, member 12A [Source:HGNC Symbol;Acc:18152]                          | 2.615150004  | 1.530985319  | 15.32881906 | 9.03E-05 | 0.001450784 | 0.329658892  | 0.056395802  | 0.778135316  | 2.9638037    | 1.218946104  |
| ENSG00000145623 | OSMR         | oncostatin M receptor [Source:HGNC Symbol;Acc:8507]                                                            | -4.137257509 | -0.070577189 | 15.31676116 | 9.09E-05 | 0.001458739 | 1.18996172   | 1.050973916  | -7.002070102 | -4.730697034 | -4.610216385 |
| ENSG00000196305 | IARS         | isoleucyl-tRNA synthetase [Source:HGNC Symbol;Acc:5330]                                                        | -1.471037835 | 6.778363626  | 15.31031668 | 9.12E-05 | 0.001462387 | 7.458978129  | 7.351155636  | 6.385835512  | 5.440525121  | 6.362825211  |
| ENSG00000110203 | FOLR3        | folate receptor 3 (gamma) [Source:HGNC Symbol;Acc:3795]                                                        | 2.355453067  | 2.909079159  | 15.30719915 | 9.14E-05 | 0.001463466 | 1.397104685  | 1.607225949  | 2.073793572  | 4.059250973  | 3.421261246  |
| ENSG00000013306 | SLC25A39     | solute carrier family 25, member 39 [Source:HGNC Symbol;Acc:24279]                                             | -1.396837743 | 6.669922986  | 15.2957478  | 9.19E-05 | 0.001471023 | 7.211210303  | 7.351155636  | 6.295865611  | 5.63944842   | 6.107350974  |

|                 |                |                                                                                                                                                          |              |             |             |             |             |              |              |              |              |              |
|-----------------|----------------|----------------------------------------------------------------------------------------------------------------------------------------------------------|--------------|-------------|-------------|-------------|-------------|--------------|--------------|--------------|--------------|--------------|
| ENSG00000238225 | CRIP1P2        | cysteine-rich protein 1 (intestinal pseudogene 2 [Source:HGNC Symbol;Acc:44517]                                                                          | 1.501810555  | 3.69362554  | 15.2849237  | 9.25E-05    | 0.001478129 | 3.181172573  | 2.969801053  | 3.929837342  | 4.327332549  | 3.609304371  |
| ENSG00000165801 | ARHGEF40       | Rho guanine nucleotide exchange factor (GEF) 40 [Source:HGNC Symbol;Acc:25516]                                                                           | 1.812028296  | 6.194723463 | 15.27720241 | 9.28E-05    | 0.001481485 | 4.443058246  | 5.380695729  | 5.857581416  | 7.176217485  | 6.642874821  |
| ENSG00000261888 | AC144831.1     |                                                                                                                                                          | 2.543909152  | 0.923008487 | 15.27868851 | 9.28E-05    | 0.001481485 | 0.046214424  | -0.713501401 | 0.538319988  | 2.126858114  | 0.791775511  |
| ENSG00000159131 | GART           | phosphoribosylglycinamide formyltransferase, phosphoribosylglycinamide synthetase, phosphoribosylaminoimidazole synthetase [Source:HGNC Symbol;Acc:4163] | -1.293262884 | 6.141816475 | 15.24566649 | 9.44E-05    | 0.00150506  | 6.701161162  | 6.707813094  | 5.64119881   | 5.066647213  | 5.924996229  |
| ENSG00000218537 | AP000350.4     | Uncharacterized protein [Source:UniProtKB/TrEMBL;Acc:85MCZ7]                                                                                             | 2.264403174  | 0.0820185   | 15.23241    | 9.51E-05    | 0.001514286 | -1.608074432 | -0.713501401 | 0.036330944  | 0.03296005   | 1.044483142  |
| ENSG00000145335 | SNCA           | synuclein, alpha (non A4 component of amyloid precursor) [Source:HGNC Symbol;Acc:11138]                                                                  | -1.429520845 | 5.156165529 | 15.21785816 | 9.58E-05    | 0.001524615 | 5.619524849  | 5.827089554  | 3.836777169  | 4.412741153  | 5.188416401  |
| ENSG00000092470 | WDR76          | WD repeat domain 76 [Source:HGNC Symbol;Acc:25773]                                                                                                       | -1.471835412 | 4.172271542 | 15.19645034 | 9.69E-05    | 0.0015406   | 4.749936823  | 4.853275919  | 3.481516588  | 2.46787168   | 4.116136211  |
| ENSG00000267174 | CTC-510F12.4   |                                                                                                                                                          | 2.361519489  | 1.904913594 | 15.1873607  | 9.74E-05    | 0.001546633 | 0.365960855  | 1.03087254   | 1.285196495  | 2.924622147  | 2.3444256    |
| ENSG00000148680 | HTR7           | 5-hydroxytryptamine (serotonin) receptor 7, adenylate cyclase-coupled [Source:HGNC Symbol;Acc:5302]                                                      | 2.171955738  | 0.798257607 | 15.18285993 | 9.76E-05    | 0.001548922 | -0.489407866 | 0.277241192  | 0.538319988  | 1.27894994   | 1.3928929    |
| ENSG0000019169  | MARCO          | macrophage receptor with collagenous structure [Source:HGNC Symbol;Acc:6895]                                                                             | 2.050014361  | 2.710085666 | 15.16263182 | 9.86E-05    | 0.00156419  | 1.32517403   | 2.107040151  | 2.642776537  | 3.84212996   | 2.32547185   |
| ENSG00000259337 | IGHV10R15-2    | immunoglobulin heavy variable 1/OR15-2 (pseudogene) [Source:HGNC Symbol;Acc:5564]                                                                        | -2.504002941 | 0.774895871 | 15.15251311 | 9.92E-05    | 0.001571176 | 2.103982592  | 1.220295226  | -3.233942493 | -1.572251189 | 0.264147325  |
| ENSG00000255734 | HNRNPABP1      | heterogeneous nuclear ribonucleoprotein A/B pseudogene 1 [Source:HGNC Symbol;Acc:48744]                                                                  | -1.306106789 | 5.083524189 | 15.13468506 | 0.000100107 | 0.001584106 | 5.658462756  | 5.715811808  | 3.984718105  | 4.192457932  | 5.002543123  |
| ENSG00000256660 | CLEC12B        | C-type lectin domain family 12, member B [Source:HGNC Symbol;Acc:31966]                                                                                  | 1.912553809  | 2.615076425 | 15.13209005 | 0.000100245 | 0.001584106 | 1.431768352  | 1.523383318  | 2.499374267  | 3.349187152  | 3.162892704  |
| ENSG00000179542 | SLITRK4        | SLIT and NTRK-like family, member 4 [Source:HGNC Symbol;Acc:23502]                                                                                       | 2.254036809  | 2.376327185 | 15.13193448 | 0.000100253 | 0.001584106 | 0.502670228  | 1.289608822  | 1.829176068  | 3.164528843  | 3.220454233  |
| ENSG00000129538 | RNASE1         | ribonuclease, RNase A family, 1 (pancreatic) [Source:HGNC Symbol;Acc:10044]                                                                              | -2.258731834 | 0.838690749 | 15.11918679 | 0.000100932 | 0.001590543 | 1.711139862  | 1.508923295  | -2.287883461 | -1.449512048 | 0.973207307  |
| ENSG00000184445 | KNTC1          | kinetochore associated 1 [Source:HGNC Symbol;Acc:17255]                                                                                                  | -1.238413571 | 5.632806697 | 15.11986854 | 0.000100896 | 0.001590543 | 6.076414358  | 6.262693411  | 5.129430966  | 4.587767468  | 5.475241888  |
| ENSG00000254614 | AP003068.23    | Uncharacterized protein [Source:UniProtKB/TrEMBL;Acc:E9PK70]                                                                                             | 1.839838108  | 3.293419596 | 15.12253298 | 0.000100753 | 0.001590543 | 2.217603867  | 2.424598913  | 3.201624573  | 4.426830846  | 2.999117651  |
| ENSG00000188282 | RUFY4          | RUN and FYVE domain containing 4 [Source:HGNC Symbol;Acc:24804]                                                                                          | 2.312033622  | 1.564576891 | 15.11731193 | 0.000101033 | 0.001590696 | 0.329658892  | 1.010487126  | 1.225685365  | 2.794059013  | 0.948644093  |
| ENSG00000141198 | TOM1L1         | target of myb1 (chicken)-like 1 [Source:HGNC Symbol;Acc:11983]                                                                                           | -2.273387498 | 1.20258933  | 15.10940214 | 0.000101457 | 0.001595943 | 2.5449974    | 1.997369264  | -1.886652327 | -1.336401299 | -0.506781561 |
| ENSG00000248712 | CCDC153        | coiled-coil domain containing 153 [Source:HGNC Symbol;Acc:27446]                                                                                         | 2.232942638  | 0.68034965  | 15.10589331 | 0.000101645 | 0.001597481 | -0.425964666 | -0.157588231 | 0.437007322  | 1.508271876  | 0.923655414  |
| ENSG00000232912 | RP5-1115A15.1  |                                                                                                                                                          | 2.275905589  | 0.002911798 | 15.09019978 | 0.000102494 | 0.001609376 | -0.489407866 | -1.394066322 | 0.471574783  | 0.074465887  | 0.303422373  |
| ENSG00000179331 | RAB39A         | RAB39A, member RAS oncogene family [Source:HGNC Symbol;Acc:16521]                                                                                        | 2.202596812  | 1.149816919 | 15.07270428 | 0.000103448 | 0.00162291  | 0.174562846  | 0.555709266  | 0.934997507  | 2.02468586   | 1.155968757  |
| ENSG00000198142 | SOWAHC         | so sondowah ankryrin repeat domain family member C [Source:HGNC Symbol;Acc:26149]                                                                        | 2.208695184  | 1.720999959 | 15.0647806  | 0.000103884 | 0.001628282 | 0.435934254  | 0.468724906  | 1.432844522  | 2.768996501  | 1.982488568  |
| ENSG00000100095 | SEZ6L          | seizure related 6 homolog (mouse)-like [Source:HGNC Symbol;Acc:10763]                                                                                    | 2.129033418  | 2.415256745 | 15.02346093 | 0.000106183 | 0.001662838 | 0.742455703  | 1.773719635  | 2.413082378  | 3.60780319   | 1.908000984  |
| ENSG00000248702 | RP11-294J22.5  |                                                                                                                                                          | 1.628075258  | 3.189880495 | 15.01499716 | 0.00010666  | 0.001668823 | 2.429680882  | 2.492318033  | 3.227138203  | 3.817895715  | 3.443406881  |
| ENSG00000269929 | RP11-286.2     |                                                                                                                                                          | 2.009127525  | 1.826165108 | 14.99134537 | 0.000108005 | 0.001688366 | 1.287817526  | 0.881727766  | 2.213098418  | 2.749909693  | 0.84598249   |
| ENSG00000136231 | IGF2BP3        | insulin-like growth factor 2 mRNA binding protein 3 [Source:HGNC Symbol;Acc:28868]                                                                       | 2.114866853  | 1.273058679 | 14.97241732 | 0.000109094 | 0.001703869 | 0.254194054  | 0.343933181  | 1.007464306  | 1.948600359  | 1.802296017  |
| ENSG00000271335 | RP11-324J22.4  |                                                                                                                                                          | 2.147350895  | 0.437349407 | 14.96184724 | 0.000109707 | 0.001711918 | -0.856736938 | -0.025429826 | 0.9100098    | 0.114810932  | 1.021113618  |
| ENSG00000258476 | RP11-76E17.3   |                                                                                                                                                          | 2.551033138  | 0.316581259 | 14.95961237 | 0.000109837 | 0.001712424 | -0.425964666 | -0.782968247 | -0.66302287  | 1.296595379  | 0.615745481  |
| ENSG00000235245 | RP11-122K13.12 |                                                                                                                                                          | 1.772192793  | 2.148968756 | 14.95577729 | 0.000110061 | 0.001714386 | 1.343495699  | 1.749322856  | 2.709464044  | 2.743490894  | 1.463945021  |
| ENSG00000238005 | RP11-44387.1   |                                                                                                                                                          | 2.437957212  | 0.347386057 | 14.94703969 | 0.000110571 | 0.001720817 | -0.856736938 | -0.713501401 | -0.907612816 | 0.984547783  | 1.279288931  |
| ENSG00000084110 | HAL            | histidine ammonia-lyase [Source:HGNC Symbol;Acc:4806]                                                                                                    | 1.94448169   | 4.532985989 | 14.93940969 | 0.000111019 | 0.001726259 | 3.08644716   | 3.380513419  | 3.836777169  | 5.415508302  | 5.307898957  |
| ENSG00000214283 | RP11-85F14.1   |                                                                                                                                                          | -2.114314001 | 1.474175043 | 14.93584681 | 0.000111229 | 0.001727992 | 2.341276415  | 2.007691074  | -1.202308962 | -0.655391447 | 1.788521245  |
| ENSG00000089127 | OAS1           | 2'-5'-oligoadenylate synthetase 1, 40/46kDa [Source:HGNC Symbol;Acc:8086]                                                                                | 1.474432763  | 6.1637703   | 14.9195001  | 0.000112197 | 0.001739949 | 4.96341172   | 5.390588949  | 6.038515166  | 6.836551042  | 6.714739006  |

|                 |              |                                                                                             |              |              |             |             |             |              |              |              |              |              |
|-----------------|--------------|---------------------------------------------------------------------------------------------|--------------|--------------|-------------|-------------|-------------|--------------|--------------|--------------|--------------|--------------|
| ENSG00000183023 | SLC8A1       | solute carrier family 8 (sodium/calcium exchanger), member 1 [Source:HGNC Symbol;Acc:11068] | 1.568814612  | 5.342856525  | 14.92085957 | 0.000112116 | 0.001739949 | 3.865767927  | 4.546744448  | 5.100732931  | 6.286090018  | 5.709830413  |
| ENSG00000177602 | GSG2         | germ cell associated 2 (haspin) [Source:HGNC Symbol;Acc:19682]                              | -2.024566913 | 2.027979108  | 14.91677401 | 0.000112359 | 0.001740927 | 2.818229329  | 2.825562359  | -0.740035668 | 0.669468625  | 1.908000984  |
| ENSG00000180155 | LYNX1        | Ly6/neurotoxin 1 [Source:HGNC Symbol;Acc:29604]                                             | 1.797195525  | 2.882630526  | 14.90810876 | 0.000112877 | 0.0017474   | 1.752861822  | 2.424598913  | 3.201624573  | 3.895212931  | 1.908000984  |
| ENSG00000226029 | RP4-798A10.2 |                                                                                             | 1.95781068   | 1.298927049  | 14.90328533 | 0.000113166 | 0.00175033  | 0.254194054  | 0.438524285  | 1.613958159  | 1.914722448  | 1.410986673  |
| ENSG00000079931 | MOXD1        | monoxygenase, DBH-like 1 [Source:HGNC Symbol;Acc:21063]                                     | -2.314482913 | 1.164226873  | 14.88920122 | 0.000114014 | 0.001761894 | 2.463579632  | 1.900991143  | -1.315629595 | -2.419096061 | 0.095393329  |
| ENSG00000188290 | HES4         | hes family bHLH transcription factor 4 [Source:HGNC Symbol;Acc:24149]                       | 2.603309944  | 0.374283841  | 14.88425632 | 0.000114313 | 0.001764965 | -1.237502295 | -1.100062965 | 0.210162819  | 1.462107232  | 0.485200289  |
| ENSG00000096006 | CRISP3       | cysteine-rich secretory protein 3 [Source:HGNC Symbol;Acc:16904]                            | -2.389407418 | 2.337146443  | 14.87592034 | 0.000114819 | 0.001771224 | 3.520070133  | 2.172725723  | 0.858697288  | -1.572251189 | 2.786891356  |
| ENSG00000100288 | CHKB         | choline kinase beta [Source:HGNC Symbol;Acc:1938]                                           | 1.996342179  | 0.805962018  | 14.87101467 | 0.000115118 | 0.001774278 | 0.329658892  | 0.095631612  | 1.205290011  | 1.148991974  | 0.706443614  |
| ENSG00000170955 | PRKDCBP      | protein kinase C, delta binding protein [Source:HGNC Symbol;Acc:9400]                       | 3.11673599   | -0.108770573 | 14.86840931 | 0.000115277 | 0.001775172 | -1.608074432 | -2.262017103 | -3.233942493 | 0.823471408  | 0.973207307  |
| ENSG00000198838 | RYR3         | ryanodine receptor 3 [Source:HGNC Symbol;Acc:10485]                                         | -2.359528659 | 2.223470658  | 14.84464692 | 0.000116739 | 0.001796101 | 3.241034999  | 3.091246938  | -2.539967122 | 1.148991974  | 1.410986673  |
| ENSG00000008438 | PGLYRP1      | peptidoglycan recognition protein 1 [Source:HGNC Symbol;Acc:8904]                           | -2.056608915 | 2.53494837   | 14.79777066 | 0.000119677 | 0.001838082 | 3.617390898  | 2.671789775  | 1.32354911   | -0.296766077 | 2.751827722  |
| ENSG00000166035 | LPC          | lipase, hepatic [Source:HGNC Symbol;Acc:6619]                                               | 2.095151837  | 0.233453511  | 14.79821387 | 0.000119649 | 0.001838082 | -0.625332215 | -0.408932621 | 0.168628767  | 0.229488395  | 0.948644093  |
| ENSG00000100297 | MCM5         | minichromosome maintenance complex component 5 [Source:HGNC Symbol;Acc:6948]                | -1.31364389  | 6.833425983  | 14.79573459 | 0.000119806 | 0.001838459 | 7.346522278  | 7.324825424  | 6.004245915  | 6.129987298  | 6.815389977  |
| ENSG00000137331 | IER3         | immediate early response 3 [Source:HGNC Symbol;Acc:5392]                                    | 2.036975964  | 4.469885326  | 14.7901279  | 0.000120163 | 0.001842323 | 3.462559037  | 2.969801053  | 3.740844752  | 5.547563528  | 4.978478481  |
| ENSG00000042832 | TG           | thyroglobulin [Source:HGNC Symbol;Acc:11764]                                                | 2.276012753  | -0.168666175 | 14.77873977 | 0.000120891 | 0.001851866 | -0.856736938 | -1.507080648 | 0.168628767  | -0.296766077 | 0.450630967  |
| ENSG00000171793 | CTPS1        | CTP synthase 1 [Source:HGNC Symbol;Acc:2519]                                                | -1.32230954  | 4.566585861  | 14.77550355 | 0.000121098 | 0.001853429 | 5.187866611  | 5.110749769  | 3.796441777  | 3.394956328  | 4.509480421  |
| ENSG00000167772 | ANGPTL4      | angiotensin-like 4 [Source:HGNC Symbol;Acc:16039]                                           | -7.936440861 | -0.414608307 | 14.7326398  | 0.000123883 | 0.001894395 | 1.148882041  | 0.242702272  | -7.002070102 | -7.002070102 | -4.610216385 |
| ENSG00000100234 | TIMP3        | TIMP metalloproteinase inhibitor 3 [Source:HGNC Symbol;Acc:11822]                           | -2.015939542 | 2.40462596   | 14.72719817 | 0.000124241 | 0.001898217 | 3.376207305  | 3.344320706  | -1.097244829 | 1.168289627  | 1.531661491  |
| ENSG00000243244 | STON1        | stonin 1 [Source:HGNC Symbol;Acc:17003]                                                     | 1.934481748  | 1.110508793  | 14.72394947 | 0.000124455 | 0.001899837 | 0.435934254  | 0.498306264  | 1.450281721  | 1.538247531  | 1.090116303  |
| ENSG00000196562 | SULF2        | sulfatase 2 [Source:HGNC Symbol;Acc:20392]                                                  | 1.645263585  | 7.282379359  | 14.70911589 | 0.000125438 | 0.001913181 | 5.515299326  | 6.563101292  | 7.384351513  | 8.298898396  | 7.283337198  |
| ENSG00000254995 | STX16-NPEPL1 | STX16-NPEPL1 readthrough (NMD candidate) [Source:HGNC Symbol;Acc:41993]                     | 1.52379355   | 3.374119987  | 14.7041087  | 0.000125772 | 0.001916604 | 2.446729819  | 3.056868784  | 4.017256742  | 4.02790164   | 2.399837082  |
| ENSG00000213934 | HBG1         | hemoglobin, gamma A [Source:HGNC Symbol;Acc:4831]                                           | -3.386428467 | 4.542722798  | 14.68469535 | 0.000127074 | 0.001933326 | 5.754014405  | 5.697597441  | 3.232187228  | -3.360122781 | -0.257803757 |
| ENSG00000171777 | RASGRP4      | RAS guanyl releasing protein 4 [Source:HGNC Symbol;Acc:18958]                               | 1.652755649  | 6.637436279  | 14.68446345 | 0.00012709  | 0.001933326 | 5.142808642  | 5.762272646  | 6.308469644  | 7.559994571  | 7.1286112    |
| ENSG00000101425 | BPI          | bactericidal/permeability-increasing protein [Source:HGNC Symbol;Acc:1095]                  | -1.478363626 | 4.991026761  | 14.67783588 | 0.000127537 | 0.001936375 | 5.728100811  | 5.110749769  | 3.697694186  | 4.02790164   | 5.388869293  |
| ENSG00000062822 | POLD1        | polymerase (DNA directed), delta 1, catalytic subunit [Source:HGNC Symbol;Acc:9175]         | -1.263685319 | 5.311463468  | 14.67659836 | 0.000127621 | 0.001936375 | 5.820107035  | 5.910592651  | 4.686264737  | 4.149407864  | 5.252533318  |
| ENSG00000134830 | C5AR2        | complement component 5a receptor 2 [Source:HGNC Symbol;Acc:4527]                            | 1.697402925  | 3.905464904  | 14.67762058 | 0.000127552 | 0.001936375 | 2.831271105  | 2.932364153  | 3.708603425  | 4.770917032  | 4.287520171  |
| ENSG00000237632 | S100A11P1    | S100 calcium binding protein A11 pseudogene 1 [Source:HGNC Symbol;Acc:10491]                | 1.810556286  | 3.11654199   | 14.66215027 | 0.000128603 | 0.00194959  | 1.806678074  | 2.564011614  | 3.11133962   | 3.827031329  | 3.439004866  |
| ENSG00000260898 | ADPGK-AS1    | ADPGK antisense RNA 1 [Source:HGNC Symbol;Acc:44144]                                        | 2.934918842  | 0.590995282  | 14.64749966 | 0.000129606 | 0.001963107 | -0.250832646 | -1.014020025 | -1.202308962 | 2.076676283  | 0.303422373  |
| ENSG00000165244 | ZNF367       | zinc finger protein 367 [Source:HGNC Symbol;Acc:18320]                                      | -1.479195661 | 3.568955356  | 14.64547879 | 0.000129746 | 0.001963519 | 4.165183448  | 4.268508089  | 2.36792042   | 2.240618578  | 3.577616005  |
| ENSG00000117877 | CD3EAP       | CD3e molecule, epsilon associated protein [Source:HGNC Symbol;Acc:24219]                    | -1.654060985 | 2.689122621  | 14.63974666 | 0.000130141 | 0.001966341 | 3.511993298  | 3.392378661  | 1.746900214  | 1.048430793  | 2.206202022  |
| ENSG00000128944 | KNSTRN       | kinetochore-localized astrin/SPAG5 binding protein [Source:HGNC Symbol;Acc:30767]           | -1.516292933 | 3.824960734  | 14.63952567 | 0.000130156 | 0.001966341 | 4.599886656  | 4.353915352  | 2.556847448  | 2.824787032  | 3.689318974  |
| ENSG00000248098 | BCKDHA       | branched chain keto acid dehydrogenase E1, alpha polypeptide [Source:HGNC Symbol;Acc:986]   | 2.040306535  | 0.170329476  | 14.60781673 | 0.000132364 | 0.001996268 | -0.196880952 | -0.30308518  | 0.28980717   | 0.434658742  | 0.139468177  |

|                 |               |                                                                                                                                                                                      |              |              |             |             |             |              |              |              |              |              |
|-----------------|---------------|--------------------------------------------------------------------------------------------------------------------------------------------------------------------------------------|--------------|--------------|-------------|-------------|-------------|--------------|--------------|--------------|--------------|--------------|
| ENSG00000244607 | CCDC13        | coiled-coil domain containing 13 [Source:HGNC Symbol;Acc:26358]                                                                                                                      | 2.118808504  | 0.396937173  | 14.60829354 | 0.000132331 | 0.001996268 | -0.365194284 | 0.095631612  | 0.081791624  | 1.109604583  | 0.303422373  |
| ENSG00000148737 | TCF7L2        | transcription factor 7-like 2 (T-cell specific, HMG-box) [Source:HGNC Symbol;Acc:11641]                                                                                              | 1.621656503  | 4.313713002  | 14.59993072 | 0.000132919 | 0.002002919 | 3.002462395  | 3.818918804  | 4.39583296   | 5.394153653  | 3.796436594  |
| ENSG00000185710 | RP11-645C24.2 |                                                                                                                                                                                      | 2.130561932  | 0.082928063  | 14.58977716 | 0.000133638 | 0.002012013 | -0.14487434  | -0.464918547 | 0.250534523  | 0.642123966  | -0.649489103 |
| ENSG00000158402 | CDC25C        | cell division cycle 25C [Source:HGNC Symbol;Acc:1727]                                                                                                                                | -2.171386459 | 1.417487004  | 14.56520345 | 0.000135392 | 0.002035165 | 2.313663059  | 2.107040151  | -2.073364206 | -1.336401299 | 1.658245749  |
| ENSG00000152672 | CLEC4F        | C-type lectin domain family 4, member F [Source:HGNC Symbol;Acc:25357]                                                                                                               | 2.468405655  | 1.706701612  | 14.56498949 | 0.000135407 | 0.002035165 | -0.698419327 | 1.09035546   | 2.096120255  | 2.543716201  | 1.673315497  |
| ENSG00000204054 | LINC00963     | long intergenic non-protein coding RNA 963 [Source:HGNC Symbol;Acc:48716]                                                                                                            | 1.422327481  | 5.651398296  | 14.56257718 | 0.000135581 | 0.002036029 | 4.493153696  | 4.98970302   | 5.546078521  | 6.336006582  | 6.113579235  |
| ENSG00000138092 | CENPO         | centromere protein O [Source:HGNC Symbol;Acc:28152]                                                                                                                                  | -1.391600525 | 4.159134349  | 14.53504198 | 0.000137577 | 0.002062474 | 4.810461175  | 4.776883982  | 3.133097051  | 3.059925941  | 4.039700715  |
| ENSG00000133216 | EPHB2         | EPH receptor B2 [Source:HGNC Symbol;Acc:3393]                                                                                                                                        | 2.064132508  | 1.759727429  | 14.53524317 | 0.000137562 | 0.002062474 | 0.435934254  | 0.836121102  | 1.245796404  | 2.506292229  | 2.453198788  |
| ENSG00000225774 | SIRPAP1       | signal-regulatory protein alpha pseudogene 1 [Source:HGNC Symbol;Acc:9663]                                                                                                           | 1.554794748  | 4.943378415  | 14.51578862 | 0.00013899  | 0.002081882 | 3.524091657  | 4.235953559  | 4.717204047  | 5.600910297  | 5.596805137  |
| ENSG00000225169 | BR13P1        | brain protein 13 pseudogene 1 [Source:HGNC Symbol;Acc:33533]                                                                                                                         | 1.768468887  | 3.405922645  | 14.50973313 | 0.000139437 | 0.002086804 | 2.32292636   | 2.753793145  | 3.216986831  | 4.19716293   | 3.736716106  |
| ENSG00000143158 | MPC2          | mitochondrial pyruvate carrier 2 [Source:HGNC Symbol;Acc:24515]                                                                                                                      | -1.284083491 | 5.548822354  | 14.50200362 | 0.000140011 | 0.002093599 | 6.301030756  | 6.005064844  | 4.731537276  | 4.7550502    | 5.214406097  |
| ENSG00000144407 | PTH2R         | parathyroid hormone 2 receptor [Source:HGNC Symbol;Acc:9609]                                                                                                                         | -2.678647847 | 0.561463722  | 14.48130163 | 0.000141558 | 0.002113134 | 1.498692903  | 1.147482679  | -4.621297774 | -2.419096061 | 0.872340852  |
| ENSG00000205913 | SRRM2-AS1     | SRRM2 antisense RNA 1 [Source:HGNC Symbol;Acc:44162]                                                                                                                                 | 2.116283736  | -0.109684564 | 14.48148463 | 0.000141544 | 0.002113134 | -0.365194284 | -0.782968247 | 0.168628767  | 0.074465887  | -0.257803757 |
| ENSG00000107242 | PIPSK1B       | phosphatidylinositol-4-phosphate 5-kinase, type 1, beta [Source:HGNC Symbol;Acc:8995]                                                                                                | -1.777685552 | 4.011202722  | 14.45225516 | 0.000143758 | 0.00214415  | 4.755078638  | 4.680176667  | 1.907011864  | 3.301918251  | 3.813541063  |
| ENSG00000233038 | AC011899.9    |                                                                                                                                                                                      | 2.141314117  | 3.508857958  | 14.44760586 | 0.000144113 | 0.002147625 | 1.593595892  | 2.618906922  | 2.979436032  | 4.596697704  | 3.943532595  |
| ENSG00000264456 | RP11-848P1.2  |                                                                                                                                                                                      | 2.243052335  | 1.400116     | 14.44045406 | 0.000144661 | 0.002153967 | 0.090278201  | 0.527293245  | 1.225685365  | 2.460063232  | 1.35601001   |
| ENSG00000147459 | DOCK5         | dedicator of cytokinesis 5 [Source:HGNC Symbol;Acc:23476]                                                                                                                            | 1.766944157  | 6.401090915  | 14.41740058 | 0.000146443 | 0.002177515 | 4.924386901  | 5.233457778  | 5.80178958   | 7.527906484  | 6.832272507  |
| ENSG00000179299 | NSUN7         | NOP2/Sun domain family, member 7 [Source:HGNC Symbol;Acc:25857]                                                                                                                      | 2.732542291  | 0.866742923  | 14.41678498 | 0.000146491 | 0.002177515 | 0.046214424  | -1.100062965 | -0.66302287  | 1.959718487  | 1.498200525  |
| ENSG00000268942 | CKS1B         | CDC28 protein kinase regulatory subunit 1B, isoform CRA_b; cDNA, FJ92030, Homo sapiens CDC28 protein kinase regulatory subunit 1B (CKS1B), mRNA [Source:UniProtKB/TrEMBL;Acc:Q5T178] | -1.823761375 | 2.042727476  | 14.41485941 | 0.000146641 | 0.002177899 | 3.047861816  | 2.598565174  | 0.663204908  | 0.114810932  | 1.732068029  |
| ENSG00000238039 | AF011889.2    |                                                                                                                                                                                      | 2.354095237  | -0.169259645 | 14.40421157 | 0.000147472 | 0.002188397 | -1.921450438 | -0.713501401 | 0.365283811  | -0.874832399 | 0.584199832  |
| ENSG00000167207 | NOD2          | nucleotide-binding oligomerization domain containing 2 [Source:HGNC Symbol;Acc:5331]                                                                                                 | 1.54280107   | 5.577497396  | 14.39271115 | 0.000148376 | 0.002199943 | 4.27425947   | 4.979251238  | 5.438791925  | 6.44237844   | 5.839068896  |
| ENSG00000163507 | KIAA1524      | KIAA1524 [Source:HGNC Symbol;Acc:29302]                                                                                                                                              | -1.530675337 | 3.805556564  | 14.38412874 | 0.000149053 | 0.002208128 | 4.432399102  | 4.321184566  | 2.474024282  | 2.580193821  | 4.045503588  |
| ENSG00000143595 | AQP10         | aquaporin 10 [Source:HGNC Symbol;Acc:16029]                                                                                                                                          | 1.839548442  | 1.924168185  | 14.37108121 | 0.00015009  | 0.002221607 | 0.597320328  | 1.184348258  | 2.404162378  | 2.412303653  | 2.109797605  |
| ENSG00000198814 | GK            | glycerol kinase [Source:HGNC Symbol;Acc:4289]                                                                                                                                        | 1.968955085  | 3.3168978    | 14.36629422 | 0.000150472 | 0.002225386 | 1.752861822  | 2.116608898  | 2.572856422  | 4.017298632  | 4.302136394  |
| ENSG00000175899 | A2M           | alpha-2-macroglobulin [Source:HGNC Symbol;Acc:7]                                                                                                                                     | -1.961243389 | 1.481463094  | 14.36064187 | 0.000150924 | 0.002226449 | 2.512979527  | 2.439924693  | -0.520331194 | -0.874832399 | 0.341656497  |
| ENSG00000124207 | CSE1L         | CSE1 chromosome segregation 1-like (yeast) [Source:HGNC Symbol;Acc:2431]                                                                                                             | -1.275428747 | 6.241598673  | 14.36242799 | 0.000150781 | 0.002226449 | 6.773045739  | 6.810871874  | 5.79583413   | 5.135673164  | 6.03773248   |
| ENSG00000048342 | CC2D2A        | coiled-coil and C2 domain containing 2A [Source:HGNC Symbol;Acc:29253]                                                                                                               | 2.11703961   | 0.448158589  | 14.3611759  | 0.000150881 | 0.002226449 | -0.856736938 | 0.056395802  | 0.28980717   | 0.74852395   | 1.044483142  |
| ENSG00000252500 | AP003068.18   |                                                                                                                                                                                      | 2.262222242  | 0.637086114  | 14.34910751 | 0.000151852 | 0.00223825  | -0.14487434  | -0.355038393 | 0.632982468  | 1.79568083   | -0.376928291 |
| ENSG00000181444 | ZNF467        | zinc finger protein 467 [Source:HGNC Symbol;Acc:23154]                                                                                                                               | 1.608221466  | 5.635050352  | 14.33833653 | 0.000152723 | 0.002249203 | 4.041581121  | 4.89279376   | 5.386536308  | 6.475193297  | 6.154427687  |
| ENSG00000139835 | GRTP1         | growth hormone regulated TBC protein 1 [Source:HGNC Symbol;Acc:20310]                                                                                                                | -1.852298768 | 1.87036752   | 14.32903832 | 0.000153479 | 0.002258445 | 2.811663962  | 2.778115078  | -0.10933503  | -0.053815412 | 1.134350211  |
| ENSG00000140836 | ZFH3          | zinc finger homeobox 3 [Source:HGNC Symbol;Acc:777]                                                                                                                                  | 1.71883001   | 4.375366581  | 14.31744093 | 0.000154427 | 0.002270498 | 2.723478589  | 3.570041503  | 4.028909353  | 5.380773935  | 4.75589272   |
| ENSG00000136869 | TLR4          | toll-like receptor 4 [Source:HGNC Symbol;Acc:11850]                                                                                                                                  | 1.762052208  | 7.259581802  | 14.29973406 | 0.000155887 | 0.002290037 | 5.372051314  | 6.230556812  | 6.897760548  | 8.024444566  | 8.075674702  |
| ENSG00000073150 | PANX2         | pannexin 2 [Source:HGNC Symbol;Acc:8600]                                                                                                                                             | 2.408143777  | 1.324183819  | 14.2890722  | 0.000156772 | 0.002301119 | 0.090278201  | 0.056395802  | 0.437007322  | 2.404187718  | 1.802296017  |

|                 |               |                                                                                                                      |              |              |             |             |             |              |              |              |              |              |
|-----------------|---------------|----------------------------------------------------------------------------------------------------------------------|--------------|--------------|-------------|-------------|-------------|--------------|--------------|--------------|--------------|--------------|
| ENSG00000150681 | RGS18         | regulator of G-protein signaling 18<br>[Source:HGNC Symbol;Acc:14261]                                                | 1.656981662  | 6.583506525  | 14.28708103 | 0.000156938 | 0.00230163  | 5.112413948  | 5.715811808  | 6.315028071  | 7.426372905  | 7.134067905  |
| ENSG00000157551 | KCNJ15        | potassium inwardly-rectifying channel, subfamily J, member 15 [Source:HGNC Symbol;Acc:6261]                          | 3.181926372  | 4.220822452  | 14.28410907 | 0.000157186 | 0.002303343 | 2.177314774  | 1.09035546   | 1.703933103  | 5.524350082  | 5.210537365  |
| ENSG00000187244 | BCAM          | basal cell adhesion molecule (Lutheran blood group) [Source:HGNC Symbol;Acc:6722]                                    | -2.288628264 | 1.752773938  | 14.25350371 | 0.000159763 | 0.00233915  | 2.313663059  | 2.948527637  | 0.036330944  | -4.730697034 | 1.498200525  |
| ENSG00000254419 | RP11-261P9.4  |                                                                                                                      | 1.843265358  | 1.662744739  | 14.24902481 | 0.000160144 | 0.00234277  | 0.714573228  | 1.272590116  | 2.273120332  | 2.22227058   | 0.997359302  |
| ENSG00000123416 | TUBA1B        | tubulin, alpha 1b [Source:HGNC Symbol;Acc:18809]                                                                     | -1.608864586 | 8.559140229  | 14.24658138 | 0.000160352 | 0.00234386  | 9.185277518  | 9.110369539  | 7.317335015  | 7.838761823  | 8.501252674  |
| ENSG00000164825 | DEFB1         | defensin, beta 1 [Source:HGNC Symbol;Acc:2766]                                                                       | -3.404990837 | -0.00055943  | 14.23993848 | 0.000160919 | 0.002350191 | 0.823008709  | 1.03087254   | -7.002070102 | -3.888428289 | -0.316136847 |
| ENSG00000135407 | AVIL          | advillin [Source:HGNC Symbol;Acc:14188]                                                                              | 1.750079094  | 2.189781106  | 14.23462107 | 0.000161374 | 0.002354882 | 1.18996172   | 1.523383318  | 2.482523865  | 2.756300061  | 2.334979851  |
| ENSG00000071246 | VASH1         | vasohibin 1 [Source:HGNC Symbol;Acc:19964]                                                                           | 1.288784537  | 5.917151958  | 14.23143189 | 0.000161648 | 0.002356917 | 4.777150473  | 5.374727068  | 6.08181195   | 6.373381992  | 6.363406068  |
| ENSG00000225439 | BOLA3-AS1     | BOLA3 antisense RNA 1 (head to head) [Source:HGNC Symbol;Acc:42922]                                                  | -1.775606452 | 2.066295261  | 14.22805298 | 0.000161938 | 0.002359193 | 2.949619895  | 2.937772127  | 0.538319988  | 0.696304622  | 1.11240278   |
| ENSG00000124635 | HIST1H2BJ     | histone cluster 1, H2b [Source:HGNC Symbol;Acc:4761]                                                                 | 2.192538169  | 1.594930577  | 14.22415275 | 0.000162274 | 0.002362127 | 0.534915169  | 0.376157587  | 1.342349735  | 2.636704962  | 1.732068029  |
| ENSG00000116990 | MYCL          | v-myc avian myelocytomatosis viral oncogene lung carcinoma derived homolog [Source:HGNC Symbol;Acc:7555]             | 1.535420303  | 4.986534894  | 14.21958917 | 0.000162668 | 0.0023659   | 3.265262705  | 4.314964006  | 5.072860299  | 5.5149591    | 5.625175993  |
| ENSG00000089041 | P2RX7         | purinergic receptor P2X, ligand-gated ion channel, 7 [Source:HGNC Symbol;Acc:8537]                                   | 1.562012786  | 4.942636551  | 14.2100741  | 0.000163493 | 0.002375925 | 3.78763224   | 4.287693936  | 4.752773603  | 5.841541259  | 5.163284825  |
| ENSG00000139618 | BRCA2         | breast cancer 2, early onset [Source:HGNC Symbol;Acc:1101]                                                           | -1.485498168 | 3.572429565  | 14.19920236 | 0.00016444  | 0.002387715 | 3.85941584   | 4.407518463  | 2.404162378  | 2.066427005  | 3.803302735  |
| ENSG00000087245 | MMP2          | matrix metalloproteinase 2 (gelatinase A, 72kDa gelatinase, 72kDa type IV collagenase) [Source:HGNC Symbol;Acc:7166] | -3.277355605 | 0.815224896  | 14.19316846 | 0.000164968 | 0.002391428 | 2.038016118  | 1.109650305  | -4.621297774 | -3.888428289 | 1.11240278   |
| ENSG00000208028 | MIR616        | microRNA 616 [Source:HGNC Symbol;Acc:32872]                                                                          | 3.008739182  | 0.786738283  | 14.19421092 | 0.000164877 | 0.002391428 | -0.942926472 | -1.289265519 | -1.097244829 | 2.536308679  | 0.139468177  |
| ENSG00000175643 | RM12          | RecQ mediated genome instability 2 [Source:HGNC Symbol;Acc:28349]                                                    | -1.679761175 | 2.391246995  | 14.14881449 | 0.000168904 | 0.002444436 | 3.02534068   | 3.100920657  | 0.632982468  | 0.642123966  | 2.610226292  |
| ENSG00000055732 | MCOLN3        | mucoilin 3 [Source:HGNC Symbol;Acc:13358]                                                                            | 2.478780429  | 0.420076082  | 14.15012969 | 0.000168785 | 0.002444436 | -1.608074432 | 0.376157587  | 1.815785154  | 0.265774258  | -3.754655114 |
| ENSG00000088305 | DNMT3B        | DNA (cytosine-5)-methyltransferase 3 beta [Source:HGNC Symbol;Acc:2979]                                              | -1.713645358 | 2.610034772  | 14.13465885 | 0.000170179 | 0.00245899  | 3.547988195  | 3.152996839  | 0.832340008  | 1.109604583  | 2.513057684  |
| ENSG00000103313 | MEFV          | Mediterranean fever [Source:HGNC Symbol;Acc:6998]                                                                    | 1.592180626  | 6.26911443   | 14.1345476  | 0.000170189 | 0.00245899  | 4.661426622  | 5.564094797  | 6.102638058  | 7.094408075  | 6.746257499  |
| ENSG00000184221 | OLIG1         | oligodendrocyte transcription factor 1 [Source:HGNC Symbol;Acc:16983]                                                | 1.995894571  | 3.343417191  | 14.11764061 | 0.000171726 | 0.002477112 | 1.448792784  | 2.837184307  | 3.434103115  | 4.430831327  | 3.03456135   |
| ENSG00000265666 | CTD-2267D19.2 |                                                                                                                      | 2.176881391  | 1.270726716  | 14.11771547 | 0.000171719 | 0.002477112 | 0.046214424  | 0.095631612  | 0.959559782  | 2.146452098  | 1.732068029  |
| ENSG00000163435 | ELF3          | E74-like factor 3 (ets domain transcription factor, epithelial-specific ) [Source:HGNC Symbol;Acc:3318]              | 2.447239032  | 0.915275299  | 14.11308958 | 0.000172142 | 0.002481074 | -0.425964666 | 0.277241192  | 0.168628767  | 2.213008328  | 0.485200289  |
| ENSG00000106952 | TNFSF8        | tumor necrosis factor (ligand) superfamily, member 8 [Source:HGNC Symbol;Acc:11938]                                  | 1.284067119  | 5.439840294  | 14.11120295 | 0.000172314 | 0.002481526 | 4.537594837  | 5.183117208  | 6.044985507  | 5.889567528  | 4.995065952  |
| ENSG00000139946 | PELI2         | pellino E3 ubiquitin protein ligase family member 2 [Source:HGNC Symbol;Acc:8828]                                    | 1.434758228  | 5.312193314  | 14.10494666 | 0.000172889 | 0.002487752 | 4.180552023  | 4.605689658  | 5.224970667  | 6.097639375  | 5.644422022  |
| ENSG00000025708 | TYMP          | thymidine phosphorylase [Source:HGNC Symbol;Acc:3148]                                                                | 1.79417547   | 7.683265806  | 14.08824535 | 0.00017443  | 0.002507884 | 5.924201569  | 6.615080104  | 7.443503286  | 8.696863537  | 8.127374541  |
| ENSG00000095637 | SORBS1        | sorbin and SH3 domain containing 1 [Source:HGNC Symbol;Acc:14565]                                                    | -1.739834001 | 2.105725903  | 14.08369436 | 0.000174853 | 0.002511903 | 2.961531071  | 2.985552753  | 0.632982468  | 0.74852395   | 1.177268129  |
| ENSG00000141338 | ABCA8         | ATP-binding cassette, sub-family A (ABC1), member 8 [Source:HGNC Symbol;Acc:38]                                      | -3.992886802 | -0.069772199 | 14.06671865 | 0.000176438 | 0.002530555 | 0.899300886  | 1.306429105  | -7.002070102 | -4.730697034 | -4.610216385 |
| ENSG00000125618 | PAX8          | paired box 8 [Source:HGNC Symbol;Acc:8622]                                                                           | 2.317363595  | 0.645289533  | 14.06670407 | 0.00017644  | 0.002530555 | -0.094677427 | -0.204475541 | -0.589913612 | 1.508271876  | 1.155968757  |
| ENSG00000142405 | NLRP12        | NLR family, pyrin domain containing 12 [Source:HGNC Symbol;Acc:22938]                                                | 1.540919007  | 5.438111213  | 14.05803033 | 0.000177255 | 0.002536037 | 4.01610833   | 4.784407659  | 5.271081512  | 6.164631713  | 5.963817525  |
| ENSG00000171368 | TPPP          | tubulin polymerization promoting protein [Source:HGNC Symbol;Acc:24164]                                              | 1.848539678  | 0.966754178  | 14.06051586 | 0.000177021 | 0.002536037 | 0.502670228  | 0.637745977  | 1.534439871  | 1.261086007  | 0.303422373  |
| ENSG00000225331 | APO105.6      |                                                                                                                      | 2.200564289  | 0.43495637   | 14.05914474 | 0.00017715  | 0.002536037 | -0.489407866 | -0.855949929 | 0.250534523  | 0.894716898  | 1.134350211  |
| ENSG00000107623 | GDF10         | growth differentiation factor 10 [Source:HGNC Symbol;Acc:4215]                                                       | -3.35951982  | 0.153155819  | 14.03113462 | 0.000179809 | 0.002570473 | 1.414540624  | 1.255368251  | -4.621297774 | -4.730697034 | -3.221241555 |

|                 |               |                                                                                                                      |              |              |             |             |             |              |              |              |              |              |
|-----------------|---------------|----------------------------------------------------------------------------------------------------------------------|--------------|--------------|-------------|-------------|-------------|--------------|--------------|--------------|--------------|--------------|
| ENSG00000108960 | MMD           | monocyte to macrophage differentiation-associated [Source:HGNC Symbol;Acc:7153]                                      | 1.48048425   | 5.499070948  | 14.02085215 | 0.000180795 | 0.002582464 | 4.631916728  | 4.840340371  | 5.438791925  | 6.355078486  | 5.559778477  |
| ENSG00000165555 | NOXRED1       | NADP-dependent oxidoreductase domain containing 1 [Source:HGNC Symbol;Acc:20487]                                     | 2.095968262  | 0.128362661  | 14.01928814 | 0.000180945 | 0.002582511 | -0.306880589 | -0.464918547 | -0.010608983 | 0.58582888   | 0.223773082  |
| ENSG00000134809 | TIMM10        | translocase of inner mitochondrial membrane 10 homolog (yeast) [Source:HGNC Symbol;Acc:11814]                        | -1.440012601 | 4.123006886  | 14.01630683 | 0.000181232 | 0.002584508 | 5.011469904  | 4.544973774  | 3.420897078  | 2.98027543   | 3.659358136  |
| ENSG00000101916 | TLR8          | toll-like receptor 8 [Source:HGNC Symbol;Acc:15632]                                                                  | 1.635507528  | 6.418834516  | 14.00651281 | 0.000182179 | 0.002595896 | 4.535604208  | 5.588367519  | 6.133998707  | 6.956912787  | 7.337850514  |
| ENSG00000214402 | LCNL1         | lipocalin-like 1 [Source:HGNC Symbol;Acc:34436]                                                                      | 2.133972647  | 0.307312521  | 13.99027135 | 0.000183759 | 0.002616293 | -0.856736938 | -0.157588231 | 0.505333341  | 1.069111613  | -0.095747566 |
| ENSG00000118263 | KLF7          | Kruppel-like factor 7 (ubiquitous) [Source:HGNC Symbol;Acc:6350]                                                     | 1.223673808  | 5.926929616  | 13.96750849 | 0.000185997 | 0.002646015 | 4.998521088  | 5.484112873  | 6.259853396  | 6.46303607   | 5.962284565  |
| ENSG00000139132 | FGD4          | FYVE, RhoGEF and PH domain containing 4 [Source:HGNC Symbol;Acc:19125]                                               | 1.620076468  | 4.881721345  | 13.94096554 | 0.000188642 | 0.002681467 | 3.547988195  | 4.107480834  | 4.575415554  | 5.862425804  | 5.176566525  |
| ENSG00000124491 | F13A1         | coagulation factor XIII, A1 polypeptide [Source:HGNC Symbol;Acc:3531]                                                | 2.095090937  | 8.0232118    | 13.93563345 | 0.000189178 | 0.002686908 | 5.116414977  | 6.489060932  | 7.149681355  | 8.729810333  | 9.251393779  |
| ENSG00000237840 | FAM21FP       | family with sequence similarity 21, member F, pseudogene [Source:HGNC Symbol;Acc:45011]                              | 2.095664197  | -0.02905503  | 13.92560719 | 0.00019019  | 0.002699094 | -0.942926472 | -0.30308518  | -0.161352853 | 0.265774258  | 0.264147325  |
| ENSG00000167608 | TMC4          | transmembrane channel-like 4 [Source:HGNC Symbol;Acc:22998]                                                          | 2.100655043  | 1.052011946  | 13.91948006 | 0.000190811 | 0.002705719 | 0.502670228  | 0.242702272  | 0.983710868  | 2.035234912  | 0.485200289  |
| ENSG00000169403 | PTAFR         | platelet-activating factor receptor [Source:HGNC Symbol;Acc:9582]                                                    | 1.687943255  | 7.107589568  | 13.89870413 | 0.000192931 | 0.002733585 | 5.445982527  | 6.278230767  | 6.794453369  | 8.125553892  | 7.473976735  |
| ENSG00000184060 | ADAP2         | ArfGAP with dual PH domains 2 [Source:HGNC Symbol;Acc:16487]                                                         | 1.642790525  | 4.79807329   | 13.89055573 | 0.00019377  | 0.002743248 | 3.64350417   | 4.018408312  | 4.444499733  | 5.78718771   | 5.049500665  |
| ENSG00000134508 | CABLES1       | Cdk5 and Abl enzyme substrate 1 [Source:HGNC Symbol;Acc:25097]                                                       | -2.009803295 | 2.604682318  | 13.8517021  | 0.000197817 | 0.002796043 | 3.590796241  | 3.509590321  | -1.097244829 | 1.610570062  | 1.643016926  |
| ENSG00000142583 | SLC2A5        | solute carrier family 2 (facilitated glucose/fructose transporter), member 5 [Source:HGNC Symbol;Acc:11010]          | -1.69856462  | 3.007122547  | 13.85232492 | 0.000197752 | 0.002796043 | 3.53210123   | 2.916017525  | 1.285196495  | 0.497040107  | 4.088296742  |
| ENSG00000140450 | ARRDC4        | arrestin domain containing 4 [Source:HGNC Symbol;Acc:28087]                                                          | 1.49729236   | 4.902466016  | 13.83869444 | 0.000199192 | 0.0028132   | 4.154846016  | 4.224936733  | 4.83638327   | 5.784845369  | 4.859994575  |
| ENSG00000132669 | RIN2          | Ras and Rab interactor 2 [Source:HGNC Symbol;Acc:18750]                                                              | 1.626067051  | 4.045719621  | 13.83165935 | 0.000199939 | 0.002821483 | 2.576320097  | 3.138979644  | 3.708603425  | 4.694777208  | 4.836757869  |
| ENSG00000120318 | ARAP3         | ArfGAP with RhoGAP domain, ankyrin repeat and PH domain 3 [Source:HGNC Symbol;Acc:24097]                             | 1.400972929  | 5.19052664   | 13.8157214  | 0.000201642 | 0.002843232 | 4.269476339  | 4.436459301  | 5.058719411  | 5.864645607  | 5.637715078  |
| ENSG00000088726 | TMEM40        | transmembrane protein 40 [Source:HGNC Symbol;Acc:25620]                                                              | 2.229759725  | 2.532292911  | 13.80497077 | 0.000202799 | 0.002854961 | 0.534915169  | 1.955327308  | 2.36792042   | 3.600718313  | 2.586540774  |
| ENSG00000238160 | AC116366.5    |                                                                                                                      | 2.286727683  | 0.219750193  | 13.80622035 | 0.000202664 | 0.002854961 | -0.555769858 | -1.394066322 | -0.271377577 | 0.669468625  | 1.06748014   |
| ENSG00000072401 | UBE2D1        | ubiquitin-conjugating enzyme E2D 1 [Source:HGNC Symbol;Acc:12474]                                                    | 1.596099673  | 5.121398021  | 13.79134391 | 0.000204275 | 0.002873439 | 3.884658084  | 4.385920009  | 4.796036708  | 5.862425804  | 5.704338732  |
| ENSG00000104974 | LILRA1        | leukocyte immunoglobulin-like receptor, subfamily A (with TM domain), member 1 [Source:HGNC Symbol;Acc:6602]         | 1.685799606  | 6.840126806  | 13.78857171 | 0.000204577 | 0.002875378 | 5.064896475  | 6.080955172  | 6.723172814  | 7.899744678  | 6.988037245  |
| ENSG00000105974 | CAV1          | caveolin 1, caveolae protein, 22kDa [Source:HGNC Symbol;Acc:1527]                                                    | -2.423150175 | 0.937941012  | 13.78397904 | 0.000205078 | 0.00288011  | 2.015339542  | 1.565913615  | -2.845623393 | -2.670141381 | 0.997359302  |
| ENSG00000251440 | STMN1P2       | stathmin 1 pseudogene 2 [Source:HGNC Symbol;Acc:44063]                                                               | -1.914610066 | 1.571952154  | 13.77634843 | 0.000205912 | 0.002889521 | 2.5449974    | 2.068117593  | -0.10933503  | -0.797916568 | 1.612068369  |
| ENSG00000053372 | MRT04         | mRNA turnover 4 homolog (S. cerevisiae) [Source:HGNC Symbol;Acc:18477]                                               | -1.354793736 | 4.112453279  | 13.76484251 | 0.000207177 | 0.002904951 | 4.855840655  | 4.686615325  | 3.468739403  | 3.007317163  | 3.628761873  |
| ENSG00000076043 | REX02         | RNA exonuclease 2 [Source:HGNC Symbol;Acc:17851]                                                                     | -1.363426868 | 5.012323505  | 13.75660797 | 0.000208088 | 0.002913059 | 5.831510229  | 5.55971708   | 4.682580808  | 3.642714894  | 4.232623634  |
| ENSG00000232063 | RP11-307E17.8 |                                                                                                                      | 2.443519152  | -0.100243522 | 13.75679174 | 0.000208067 | 0.002913059 | -0.775407551 | -1.394066322 | -1.721358966 | 0.58582888   | 0.706443614  |
| ENSG00000091136 | LAMB1         | laminin, beta 1 [Source:HGNC Symbol;Acc:6486]                                                                        | -3.370312235 | 0.147393701  | 13.73936941 | 0.000210006 | 0.002937574 | 1.448792784  | 1.184348258  | -4.621297774 | -4.730697034 | -2.832686105 |
| ENSG00000173110 | HSPA6         | heat shock 70kDa protein 6 (HSP70B) [Source:HGNC Symbol;Acc:5239]                                                    | 1.928755475  | 4.759711558  | 13.72132953 | 0.000212033 | 0.002963562 | 3.402659809  | 3.026735387  | 3.645664403  | 5.598244827  | 5.794968012  |
| ENSG00000108813 | DLX4          | distal-less homeobox 4 [Source:HGNC Symbol;Acc:2917]                                                                 | 2.194440255  | 0.402484096  | 13.71893151 | 0.000212304 | 0.002964988 | -0.856736938 | 0.056395802  | 0.471574783  | 1.224680533  | 0.002986071  |
| ENSG00000163751 | CPA3          | carboxypeptidase A3 (mast cell) [Source:HGNC Symbol;Acc:2298]                                                        | -2.477132391 | 3.717653498  | 13.70038148 | 0.000214411 | 0.002989662 | 5.124383901  | 3.368549783  | 0.081791624  | 2.086853261  | 3.908936602  |
| ENSG00000100985 | MMP9          | matrix metalloproteinase 9 (gelatinase B, 92kDa gelatinase, 92kDa type IV collagenase) [Source:HGNC Symbol;Acc:7176] | -1.462287709 | 3.99049932   | 13.70166248 | 0.000214265 | 0.002989662 | 4.597980204  | 4.1453694    | 3.026695712  | 2.320413773  | 4.595060667  |

|                 |               |                                                                                                       |              |              |             |             |             |              |              |              |              |              |
|-----------------|---------------|-------------------------------------------------------------------------------------------------------|--------------|--------------|-------------|-------------|-------------|--------------|--------------|--------------|--------------|--------------|
| ENSG00000164283 | ESM1          | endothelial cell-specific molecule 1<br>[Source:HGNC Symbol;Acc:3466]                                 | -2.013583765 | 1.347626996  | 13.6974966  | 0.000214741 | 0.002991881 | 2.521050858  | 2.329059307  | -0.329705368 | -1.70641174  | -0.894110176 |
| ENSG00000129951 | LPPR3         | hsa-mir-3187<br>[Source:mirBase;Acc:MI0014231]                                                        | -2.572303518 | 1.29123135   | 13.69323398 | 0.000215229 | 0.002994507 | 1.431768352  | 1.565913615  | -3.766908349 | -2.97427061  | 2.618035833  |
| ENSG00000004897 | CDC27         | cell division cycle 27 [Source:HGNC Symbol;Acc:1728]                                                  | -1.167717728 | 5.849285033  | 13.69287045 | 0.00021527  | 0.002994507 | 6.273225961  | 6.485834221  | 5.196838033  | 5.087070373  | 5.652999673  |
| ENSG00000112303 | VNN2          | vanin 2 [Source:HGNC Symbol;Acc:12706]                                                                | 1.406920882  | 6.758020245  | 13.6727694  | 0.000217587 | 0.003024336 | 5.74111579   | 6.112381464  | 6.819829477  | 7.584667222  | 6.823855937  |
| ENSG00000111961 | SASH1         | SAM and SH3 domain containing 1<br>[Source:HGNC Symbol;Acc:19182]                                     | 1.604100775  | 3.736985971  | 13.63634666 | 0.000221849 | 0.003078699 | 2.32292636   | 3.105733301  | 3.768911065  | 4.544115616  | 3.983377119  |
| ENSG00000131669 | NINJ1         | ninjurin 1 [Source:HGNC Symbol;Acc:7824]                                                              | 1.674096628  | 5.9735714    | 13.63738432 | 0.000221726 | 0.003078699 | 4.626315788  | 5.247679482  | 5.635493586  | 7.104148066  | 5.997885367  |
| ENSG00000161647 | MPP3          | membrane protein, palmitoylated 3 (MAGUK p55 subfamily member 3) [Source:HGNC Symbol;Acc:7221]        | 2.280761339  | -0.335426867 | 13.62871552 | 0.000222752 | 0.003088796 | -1.608074432 | -0.713501401 | -1.315629595 | 0.114810932  | 0.341656497  |
| ENSG00000110446 | SLC15A3       | solute carrier family 15 (oligopeptide transporter), member 3 [Source:HGNC Symbol;Acc:18068]          | 1.618138953  | 6.084385466  | 13.61669095 | 0.000224183 | 0.003106189 | 4.813750332  | 5.355661735  | 5.782989063  | 7.156724394  | 6.173101579  |
| ENSG00000099785 | Mar-02        | membrane-associated ring finger (C3HC4) 2, E3 ubiquitin protein ligase [Source:HGNC Symbol;Acc:28038] | 1.39577187   | 5.419663679  | 13.61144688 | 0.000224811 | 0.003109968 | 4.410841602  | 4.758665442  | 5.331140544  | 6.144066896  | 5.766265118  |
| ENSG00000225889 | AC074289.1    |                                                                                                       | 2.311789522  | 4.363434318  | 13.61254766 | 0.000224679 | 0.003109968 | 3.118718315  | 2.910527228  | 3.329625449  | 5.856489577  | 4.201775615  |
| ENSG00000236592 | S100A11P2     | S100 calcium binding protein A11 pseudogene 2 [Source:HGNC Symbol;Acc:37840]                          | 1.678370904  | 3.005852781  | 13.60604798 | 0.000225458 | 0.003116469 | 1.883815937  | 2.521424373  | 3.026695712  | 3.642714894  | 3.295420086  |
| ENSG00000159055 | MIS18A        | MIS18 kinetochore protein A [Source:HGNC Symbol;Acc:1286]                                             | -1.43342926  | 3.390558109  | 13.58883155 | 0.000227535 | 0.003142707 | 4.096626906  | 3.947798472  | 2.439516168  | 2.02468586   | 3.338598326  |
| ENSG00000185291 | IL3RA         | interleukin 3 receptor, alpha (low affinity) [Source:HGNC Symbol;Acc:6012]                            | 1.936831375  | 2.11567819   | 13.56669757 | 0.000230234 | 0.003177484 | 0.365960855  | 0.968831255  | 0.959559782  | 2.045707388  | 3.601447293  |
| ENSG00000141744 | PNMT          | phenylethanolamine N-methyltransferase [Source:HGNC Symbol;Acc:9160]                                  | -2.293209327 | 0.434698284  | 13.53403534 | 0.000234276 | 0.003230724 | 1.63880454   | 1.272590116  | -2.845623393 | -1.854339469 | -0.9858258   |
| ENSG00000226380 | MIR29A        | microRNA 29a [Source:HGNC Symbol;Acc:31616]                                                           | 2.334174497  | 0.724707265  | 13.51295944 | 0.000236922 | 0.003264646 | 0.329658892  | -0.713501401 | 0.401591237  | 1.692827451  | 0.646616095  |
| ENSG00000133063 | CHIT1         | chitinase 1 (chitotriosidase) [Source:HGNC Symbol;Acc:1936]                                           | -2.568230134 | 3.640774064  | 13.49726513 | 0.000238911 | 0.003286904 | 4.397750769  | 2.217877931  | -1.438615935 | 0.984547783  | 5.092177156  |
| ENSG00000126262 | FFAR2         | free fatty acid receptor 2 [Source:HGNC Symbol;Acc:4501]                                              | 3.065476661  | 4.873277006  | 13.49856961 | 0.000238745 | 0.003286904 | 2.778381342  | 1.128690501  | 2.28288562   | 5.950051493  | 6.140939638  |
| ENSG00000188739 | RBM34         | RNA binding motif protein 34 [Source:HGNC Symbol;Acc:28965]                                           | 1.947715692  | 0.784746361  | 13.48770929 | 0.000240131 | 0.003299762 | 0.254194054  | 0.468724906  | 0.983710868  | 1.582074621  | -0.376928291 |
| ENSG00000176681 | LRRC37A       | leucine rich repeat containing 37A [Source:HGNC Symbol;Acc:29069]                                     | 2.095487323  | 0.109633573  | 13.48700038 | 0.000240222 | 0.003299762 | -0.489407866 | -0.647226338 | -0.520331194 | 0.369457657  | 0.84598249   |
| ENSG00000187951 | ARHGAP11B     | Rho GTPase activating protein 11B [Source:HGNC Symbol;Acc:15782]                                      | -1.394269686 | 3.798107616  | 13.47815273 | 0.000241357 | 0.003312766 | 4.438804034  | 4.314964006  | 2.860570679  | 2.558418111  | 3.860382081  |
| ENSG00000267736 | HMG82P1       | high mobility group box 2 pseudogene 1 [Source:HGNC Symbol;Acc:39174]                                 | -1.20922072  | 5.436584415  | 13.46691133 | 0.000242808 | 0.00333007  | 5.972825997  | 6.047579027  | 4.726178989  | 4.225075169  | 5.39683538   |
| ENSG00000256616 | RP11-815J4.6  |                                                                                                       | -2.016695153 | 0.919570839  | 13.46089779 | 0.000243587 | 0.003338152 | 1.752861822  | 1.508923295  | -1.315629595 | -1.336401299 | 1.11240278   |
| ENSG00000133119 | RFC3          | replication factor C (activator 1) 3, 38kDa [Source:HGNC Symbol;Acc:9971]                             | -1.451618031 | 3.717688577  | 13.45694362 | 0.000244101 | 0.00333998  | 4.425965607  | 4.222723237  | 2.474024282  | 2.657338701  | 3.750992014  |
| ENSG00000122497 | NBPF14        | neuroblastoma breakpoint family, member 14 [Source:HGNC Symbol;Acc:25232]                             | 1.291862485  | 5.510450446  | 13.45785395 | 0.000243983 | 0.00333998  | 4.756788512  | 5.259604691  | 5.871400925  | 6.340798246  | 4.503168814  |
| ENSG00000196668 | LINC00173     | long intergenic non-protein coding RNA 173 [Source:HGNC Symbol;Acc:33791]                             | 2.28963693   | 1.593677122  | 13.44038131 | 0.000246266 | 0.003366972 | 0.133035942  | 0.610915408  | 1.098750223  | 2.860817063  | 1.463945021  |
| ENSG00000268279 | RP11-434D12.1 |                                                                                                       | 1.832907618  | 0.99639209   | 13.43401522 | 0.000247103 | 0.003375788 | 0.534915169  | 0.438524285  | 1.484536312  | 1.582074621  | 0.139468177  |
| ENSG00000221829 | FANCG         | Fanconi anemia, complementation group G [Source:HGNC Symbol;Acc:3588]                                 | -1.275477366 | 4.332149056  | 13.42203882 | 0.000248685 | 0.003392129 | 4.884277045  | 4.857562122  | 3.645664403  | 3.266541267  | 4.304558099  |
| ENSG00000166226 | CCT2          | chaperonin containing TCP1, subunit 2 (beta) [Source:HGNC Symbol;Acc:1615]                            | -1.246323737 | 6.890103716  | 13.42298066 | 0.00024856  | 0.003392129 | 7.439414943  | 7.459693454  | 6.346216488  | 5.996001926  | 6.614365337  |
| ENSG00000152556 | PFKM          | phosphofructokinase, muscle [Source:HGNC Symbol;Acc:8877]                                             | -1.285147684 | 4.559680848  | 13.41933728 | 0.000249044 | 0.003392919 | 5.192927623  | 5.299008392  | 4.063312903  | 3.353408508  | 3.880000416  |
| ENSG00000204110 | RP1-153P14.8  |                                                                                                       | 2.204587675  | 0.4022114731 | 13.4186893  | 0.00024913  | 0.003392919 | -0.856736938 | 0.171040209  | 1.415193986  | -0.296766077 | 0.264147325  |
| ENSG00000131724 | IL13RA1       | interleukin 13 receptor, alpha 1 [Source:HGNC Symbol;Acc:5974]                                        | 1.557117411  | 6.432992689  | 13.38795908 | 0.000253245 | 0.003443324 | 4.906013124  | 5.809497926  | 6.257379042  | 7.253917993  | 6.864635841  |
| ENSG00000178146 | RP1-232L2.6.1 |                                                                                                       | 1.663033142  | 4.072879325  | 13.38666745 | 0.000253419 | 0.003443324 | 3.053437594  | 3.036849946  | 3.634266777  | 4.764591224  | 4.796031523  |
| ENSG00000231027 | AC079325.6    |                                                                                                       | 1.991878799  | 3.156118245  | 13.388339   | 0.000253194 | 0.003443324 | 1.397104685  | 2.287305009  | 2.723873993  | 4.18537154   | 3.581615324  |
| ENSG00000134245 | WNT2B         | wingless-type MMTV integration site family, member 2B [Source:HGNC Symbol;Acc:12781]                  | 2.116060141  | -0.181164101 | 13.38260448 | 0.000253969 | 0.003448123 | -1.350769713 | 0.016063025  | 0.471574783  | -0.009775356 | -1.55968627  |
| ENSG00000102003 | SYP           | synaptophysin [Source:HGNC Symbol;Acc:11506]                                                          | 1.979548169  | 0.296733501  | 13.3756369  | 0.000254914 | 0.003458281 | -0.046168491 | -0.464918547 | 0.778135316  | 0.556835562  | 0.002986071  |
| ENSG00000179115 | FARSA         | phenylalanyl-tRNA synthetase, alpha subunit [Source:HGNC Symbol;Acc:3592]                             | -1.161037515 | 5.533979172  | 13.36401451 | 0.000256499 | 0.003477092 | 6.041769892  | 5.984308824  | 4.878855169  | 4.759828599  | 5.513426495  |



|                 |               |                                                                                                                     |              |              |             |             |             |              |              |              |              |              |
|-----------------|---------------|---------------------------------------------------------------------------------------------------------------------|--------------|--------------|-------------|-------------|-------------|--------------|--------------|--------------|--------------|--------------|
| ENSG00000100592 | DAAM1         | dishevelled associated activator of morphogenesis 1 [Source:HGNC Symbol;Acc:18142]                                  | -1.286367546 | 4.846029848  | 13.35929611 | 0.000257145 | 0.003483161 | 5.127030457  | 5.627378336  | 4.300507637  | 3.597162784  | 4.7717325    |
| ENSG0000010327  | STAB1         | stabilin 1 [Source:HGNC Symbol;Acc:18628]                                                                           | 1.76671394   | 8.013462203  | 13.35657824 | 0.000257518 | 0.003485523 | 6.183268745  | 6.977343349  | 7.672943612  | 8.960654563  | 8.610124806  |
| ENSG00000158517 | NCF1          | neutrophil cytosolic factor 1 [Source:HGNC Symbol;Acc:7660]                                                         | 1.490700295  | 5.890837696  | 13.3514046  | 0.000258229 | 0.00349246  | 4.70812895   | 5.049623575  | 5.547091836  | 6.733841745  | 6.391585327  |
| ENSG00000121053 | EPX           | eosinophil peroxidase [Source:HGNC Symbol;Acc:3423]                                                                 | -3.333944703 | 1.674635683  | 13.34260645 | 0.000259443 | 0.003506182 | 3.719122423  | 0.583576386  | -2.539967122 | -2.0191864   | -0.649489103 |
| ENSG00000137261 | KIAA0319      | KIAA0319 [Source:HGNC Symbol;Acc:21580]                                                                             | 2.411915378  | -0.060801179 | 13.3244739  | 0.000261964 | 0.003537527 | -0.856736938 | -1.507080648 | -1.886652327 | 0.642123966  | 0.84598249   |
| ENSG00000138587 | MNS1          | meiosis-specific nuclear structural 1 [Source:HGNC Symbol;Acc:29636]                                                | -2.438119793 | 0.769745751  | 13.31778836 | 0.0002629   | 0.003547433 | 1.752861822  | 1.537699846  | -3.766908349 | -2.419096061 | 0.763888603  |
| ENSG00000161642 | ZNF385A       | zinc finger protein 385A [Source:HGNC Symbol;Acc:17521]                                                             | 1.620135535  | 7.155253348  | 13.29165245 | 0.00026659  | 0.003594466 | 5.707029501  | 6.445591319  | 6.990069448  | 8.20098638   | 7.244450159  |
| ENSG00000241975 | TCEB1P19      | transcription elongation factor B (SII), polypeptide 1 pseudogene 19 [Source:HGNC Symbol;Acc:38155]                 | 2.177307604  | 0.397581207  | 13.2852539  | 0.000267502 | 0.003603986 | -0.942926472 | -0.025429826 | 0.663204908  | 1.187332556  | -0.095747566 |
| ENSG00000095303 | PTGS1         | prostaglandin-endoperoxide synthase 1 (prostaglandin G/H synthase and cyclooxygenase) [Source:HGNC Symbol;Acc:9604] | 1.624794647  | 6.738549814  | 13.27660518 | 0.000268739 | 0.003617874 | 5.429996748  | 5.930395455  | 6.376174842  | 7.832916182  | 6.888238838  |
| ENSG00000176124 | DLEU1         | deleted in lymphocytic leukemia 1 (non-protein coding) [Source:HGNC Symbol;Acc:13747]                               | -1.663557879 | 2.837047558  | 13.26435747 | 0.0002705   | 0.003636259 | 3.632370594  | 3.491317573  | 2.118106677  | 1.0274492    | 2.435629945  |
| ENSG00000145936 | KCNMB1        | potassium large conductance calcium-activated channel, subfamily M, beta member 1 [Source:HGNC Symbol;Acc:6285]     | 2.083021519  | 2.905333577  | 13.26422935 | 0.000270519 | 0.003636259 | 1.018120824  | 2.261659784  | 2.580794782  | 3.95477112   | 3.146787158  |
| ENSG00000162878 | PKDCC         | protein kinase domain containing, cytoplasmic [Source:HGNC Symbol;Acc:25123]                                        | -2.291073691 | 0.931344676  | 13.2587291  | 0.000271314 | 0.003644154 | 1.397104685  | 2.144940142  | -2.539967122 | -2.205328685 | 0.819133578  |
| ENSG00000239672 | NME1          | NME/NM23 nucleoside diphosphate kinase 1 [Source:HGNC Symbol;Acc:7849]                                              | -1.535145217 | 3.273524796  | 13.22523185 | 0.000276206 | 0.003707025 | 4.271869887  | 3.664397071  | 2.330744516  | 2.014059105  | 2.807527639  |
| ENSG00000247950 | SEC24B-AS1    | SEC24B antisense RNA 1 [Source:HGNC Symbol;Acc:44003]                                                               | 1.978370335  | 0.099341665  | 13.22104631 | 0.000276823 | 0.003712474 | -0.775407551 | 0.133828548  | 0.75024962   | 0.192266291  | -0.80787826  |
| ENSG00000117215 | PLA2G2D       | phospholipase A2, group IID [Source:HGNC Symbol;Acc:9033]                                                           | -2.157864389 | 0.919283337  | 13.21928424 | 0.000277083 | 0.003713129 | 2.266432806  | 1.565913615  | -0.82139248  | -2.419096061 | -0.649489103 |
| ENSG00000144554 | FANCD2        | Fanconi anemia, complementation group D2 [Source:HGNC Symbol;Acc:3585]                                              | -1.226077654 | 5.272735075  | 13.20192256 | 0.000279662 | 0.003744827 | 5.751443891  | 5.938510869  | 4.844648634  | 4.079778361  | 5.007010895  |
| ENSG00000160593 | AMICA1        | adhesion molecule, interacts with CXADR antigen 1 [Source:HGNC Symbol;Acc:19084]                                    | 1.803349922  | 8.736034899  | 13.19770654 | 0.000280292 | 0.0037504   | 7.181919154  | 7.828215361  | 8.767241674  | 9.674037828  | 8.984671054  |
| ENSG00000164951 | PDP1          | pyruvate dehydrogenase phosphatase catalytic subunit 1 [Source:HGNC Symbol;Acc:9279]                                | 1.17258672   | 5.35689613   | 13.19419306 | 0.000280818 | 0.003754576 | 4.76870122   | 4.779898163  | 5.898649044  | 5.681188062  | 5.283553932  |
| ENSG00000033327 | GAB2          | GRB2-associated binding protein 2 [Source:HGNC Symbol;Acc:14458]                                                    | 1.584899963  | 6.199561234  | 13.17746643 | 0.000283336 | 0.003785355 | 4.896737732  | 5.224635763  | 5.74816569   | 7.219932093  | 6.602605111  |
| ENSG00000186314 | PRELID2       | PRELI domain containing 2 [Source:HGNC Symbol;Acc:28306]                                                            | -1.874131407 | 1.568812483  | 13.17548203 | 0.000283636 | 0.003786483 | 2.5449974    | 2.116608898  | -0.059127673 | -0.46496394  | 1.428856327  |
| ENSG00000206053 | HN1L          | hematological and neurological expressed 1-like [Source:HGNC Symbol;Acc:14137]                                      | -1.225181809 | 5.524431333  | 13.13391212 | 0.000289999 | 0.003865547 | 6.036852591  | 6.127841572  | 5.148250672  | 4.301347534  | 5.288455913  |
| ENSG00000113916 | BCL6          | B-cell CLL/lymphoma 6 [Source:HGNC Symbol;Acc:1001]                                                                 | 1.628888636  | 6.990349434  | 13.13517101 | 0.000289804 | 0.003865547 | 5.708797246  | 5.61223861   | 6.376174842  | 7.789957742  | 7.844757048  |
| ENSG00000111729 | CLE4A         | C-type lectin domain family 4, member A [Source:HGNC Symbol;Acc:13257]                                              | 1.660553009  | 5.101984032  | 13.13051877 | 0.000290524 | 0.003869616 | 3.669153174  | 4.503636694  | 4.854504969  | 5.985160969  | 5.451399363  |
| ENSG00000178921 | PFAS          | phosphoribosylformylglycinamide synthase [Source:HGNC Symbol;Acc:8863]                                              | -1.277065455 | 5.261994236  | 13.12605026 | 0.000291218 | 0.003875916 | 5.776945226  | 5.960595701  | 4.872401862  | 3.906748526  | 4.91491577   |
| ENSG00000156968 | MPV17L        | MPV17 mitochondrial membrane protein-like [Source:HGNC Symbol;Acc:26827]                                            | -2.20438506  | 0.915166821  | 13.11227313 | 0.000293368 | 0.003901566 | 1.871242652  | 1.955327308  | -3.766908349 | -1.336401299 | 0.139468177  |
| ENSG00000248019 | FAM13A-AS1    | FAM13A antisense RNA 1 [Source:HGNC Symbol;Acc:19370]                                                               | 1.405105327  | 4.52953018   | 13.10340239 | 0.00029476  | 0.003917116 | 3.567603998  | 4.244706846  | 4.834724499  | 5.173171083  | 4.304558099  |
| ENSG00000234062 | RP11-308D16.4 |                                                                                                                     | 1.993962562  | -0.11059726  | 13.09965451 | 0.00029535  | 0.003921992 | -0.856736938 | -0.112176905 | 0.081791624  | 0.229488395  | -0.649489103 |
| ENSG00000175471 | MCTP1         | multiple C2 domains, transmembrane 1 [Source:HGNC Symbol;Acc:26183]                                                 | 1.454203792  | 5.03962141   | 13.09038412 | 0.000296815 | 0.00393847  | 3.632370594  | 4.287693936  | 4.724388461  | 5.902589236  | 5.502920638  |
| ENSG00000038945 | MSR1          | macrophage scavenger receptor 1 [Source:HGNC Symbol;Acc:7376]                                                       | 1.53122116   | 2.887432017  | 13.07670789 | 0.00029899  | 0.003964334 | 1.725181674  | 1.997369264  | 2.961306749  | 3.399046051  | 3.473850543  |
| ENSG00000105810 | CDK6          | cyclin-dependent kinase 6 [Source:HGNC Symbol;Acc:1777]                                                             | -1.237013054 | 6.731384465  | 13.05276736 | 0.000302837 | 0.004012299 | 7.148443281  | 7.283743127  | 6.323923603  | 5.822635386  | 6.5937216    |
| ENSG00000260078 | RP11-44F14.1  |                                                                                                                     | 1.891255429  | 3.104105456  | 13.03942169 | 0.000305002 | 0.004037945 | 1.806678074  | 2.163523194  | 2.680205034  | 4.017298632  | 3.601447293  |

|                 |               |                                                                                                 |              |              |             |             |             |              |              |              |              |              |
|-----------------|---------------|-------------------------------------------------------------------------------------------------|--------------|--------------|-------------|-------------|-------------|--------------|--------------|--------------|--------------|--------------|
| ENSG00000253325 | IGHV7-34-1    | immunoglobulin heavy variable 7-34-1 (pseudogene) [Source:HGNC Symbol;Acc:5664]                 | -2.947616851 | -0.098871178 | 13.02248062 | 0.000307774 | 0.004071567 | 1.37945544   | 0.343933181  | -3.233942493 | -4.730697034 | -1.42520211  |
| ENSG00000262766 | RP11-196G11.4 |                                                                                                 | 1.948381033  | 1.620837751  | 13.00853732 | 0.000310074 | 0.004098908 | 0.97176043   | 0.859104642  | 1.674560554  | 2.551085884  | 1.177268129  |
| ENSG00000186047 | DLEU7         | deleted in lymphocytic leukemia, 7 [Source:HGNC Symbol;Acc:17567]                               | 1.91830351   | 1.628422812  | 13.00179248 | 0.000311193 | 0.004110604 | 0.46968809   | 1.128690501  | 1.598401271  | 2.420374188  | 1.688229459  |
| ENSG00000125257 | ABCC4         | ATP-binding cassette, sub-family C (CFTR/MRP), member 4 [Source:HGNC Symbol;Acc:55]             | -1.180109587 | 4.857783853  | 12.99409377 | 0.000312475 | 0.004124436 | 5.404045254  | 5.498822445  | 4.278711965  | 4.199509687  | 4.272754352  |
| ENSG00000155189 | AGPAT5        | 1-acylglycerol-3-phosphate O-acyltransferase 5 [Source:HGNC Symbol;Acc:20886]                   | -1.209185985 | 4.886318638  | 12.99159781 | 0.000312892 | 0.004126834 | 5.415997664  | 5.435243807  | 4.266459447  | 3.653025764  | 4.897374905  |
| ENSG00000157306 | RP11-66N24.4  |                                                                                                 | 1.785716893  | 1.394281245  | 12.98942809 | 0.000313255 | 0.004128517 | 0.534915169  | 1.109650305  | 1.788624578  | 1.75796486   | 1.279288931  |
| ENSG00000240041 | IGHJ4         | immunoglobulin heavy joining 4 [Source:HGNC Symbol;Acc:5538]                                    | -1.632343768 | 2.948838894  | 12.98127704 | 0.000314621 | 0.004143419 | 3.942895577  | 2.995959146  | 0.75024962   | 3.140302572  | 2.153441144  |
| ENSG00000149573 | MPZL2         | myelin protein zero-like 2 [Source:HGNC Symbol;Acc:3496]                                        | 1.675579575  | 2.38954834   | 12.97603198 | 0.000315504 | 0.004151927 | 1.084982398  | 1.508923295  | 2.330744516  | 2.650493526  | 3.275806983  |
| ENSG00000168255 | POLR2J3       | polymerase (RNA) II (DNA directed) polypeptide J3 [Source:HGNC Symbol;Acc:33853]                | 1.594821204  | 2.614394649  | 12.96052399 | 0.000318128 | 0.004183325 | 1.752861822  | 2.278807152  | 3.026695712  | 3.378480503  | 1.829457167  |
| ENSG00000161921 | CXCL16        | chemokine (C-X-C motif) ligand 16 [Source:HGNC Symbol;Acc:16642]                                | 1.569657411  | 5.73867773   | 12.9524393  | 0.000319505 | 0.004195145 | 4.147044042  | 5.117913874  | 5.575179501  | 6.736672335  | 5.905186683  |
| ENSG00000166825 | ANPEP         | alanyl (membrane) aminopeptidase [Source:HGNC Symbol;Acc:500]                                   | 1.714628741  | 7.538688044  | 12.95317505 | 0.000319379 | 0.004195145 | 5.85803785   | 6.956514725  | 7.578723449  | 8.711017077  | 7.097526627  |
| ENSG00000181234 | TMEM132C      | transmembrane protein 132C [Source:HGNC Symbol;Acc:25436]                                       | -2.645009075 | 0.096349119  | 12.9441256  | 0.000320927 | 0.004210667 | 1.084982398  | 1.255368251  | -2.845623393 | -4.730697034 | -1.55968627  |
| ENSG00000131389 | SLC6A6        | solute carrier family 6 (neurotransmitter transporter), member 6 [Source:HGNC Symbol;Acc:11052] | 1.437435607  | 7.081052563  | 12.90188375 | 0.000328252 | 0.004303552 | 5.87781472   | 6.234407269  | 6.919442354  | 7.996881928  | 7.376058358  |
| ENSG00000246203 | RP11-29H23.5  |                                                                                                 | 1.952960238  | -0.168830407 | 12.89686556 | 0.000329133 | 0.004311886 | -0.625332215 | -0.204475541 | 0.210162819  | 0.074465887  | -1.18885156  |
| ENSG00000141873 | SLC39A3       | solute carrier family 39 (zinc transporter), member 3 [Source:HGNC Symbol;Acc:17128]            | -1.209393568 | 4.627740111  | 12.89151841 | 0.000330075 | 0.004320998 | 5.281115145  | 5.120294025  | 3.879237643  | 3.836109456  | 4.368453247  |
| ENSG00000246430 | LINC00968     | long intergenic non-protein coding RNA 968 [Source:HGNC Symbol;Acc:48727]                       | 2.043767211  | 1.289168938  | 12.88998876 | 0.000330344 | 0.004321309 | -0.046168491 | 0.764888368  | 0.884581662  | 1.86827773   | 1.920685729  |
| ENSG00000267169 | CTB-55O6.12   |                                                                                                 | 1.648993262  | 3.044840495  | 12.88337471 | 0.000331514 | 0.004333378 | 2.049222129  | 2.361613919  | 2.955212673  | 3.817895715  | 3.300281982  |
| ENSG00000108839 | ALOX12        | arachidonate 12-lipoxygenase [Source:HGNC Symbol;Acc:429]                                       | 2.224313307  | 3.688675089  | 12.86780314 | 0.000334284 | 0.004366333 | 1.63880454   | 2.959203556  | 3.066814926  | 5.028876849  | 3.613216922  |
| ENSG00000075399 | VPS9D1        | VPS9 domain containing 1 [Source:HGNC Symbol;Acc:13526]                                         | 1.186236607  | 5.241396468  | 12.86289982 | 0.000335161 | 0.004374534 | 4.503374838  | 4.6359475    | 5.437699584  | 5.728270006  | 5.491275141  |
| ENSG00000007968 | E2F2          | E2F transcription factor 2 [Source:HGNC Symbol;Acc:3114]                                        | -1.323955862 | 4.92347364   | 12.85756434 | 0.000336118 | 0.004380511 | 5.298828106  | 5.51700098   | 3.527421294  | 4.139664188  | 5.214406097  |
| ENSG00000114405 | C3orf14       | chromosome 3 open reading frame 14 [Source:HGNC Symbol;Acc:25024]                               | 2.265207072  | 0.980113505  | 12.85783693 | 0.000336069 | 0.004380511 | -0.489407866 | 0.527293245  | 0.602113338  | 1.914722448  | 1.090116303  |
| ENSG00000197122 | SRC           | v-src avian sarcoma (Schmidt-Ruppin A-2) viral oncogene homolog [Source:HGNC Symbol;Acc:11283]  | 1.621854418  | 5.359321359  | 12.85303858 | 0.000336932 | 0.00438659  | 4.077598864  | 4.710507559  | 4.960222513  | 6.452252305  | 5.432701873  |
| ENSG00000185168 | LINC00482     | long intergenic non-protein coding RNA 482 [Source:HGNC Symbol;Acc:26816]                       | 2.616816796  | 0.813778248  | 12.85219262 | 0.000337084 | 0.00438659  | -1.608074432 | 0.376157587  | 0.602113338  | 2.165783527  | -0.257803757 |
| ENSG00000115457 | IGFBP2        | insulin-like growth factor binding protein 2, 36kDa [Source:HGNC Symbol;Acc:5471]               | -1.550249795 | 2.505683281  | 12.84381576 | 0.000338596 | 0.004396197 | 3.424338996  | 3.408048696  | 1.415193986  | 1.109604583  | 0.923655414  |
| ENSG00000121989 | ACVR2A        | activin A receptor, type IIA [Source:HGNC Symbol;Acc:173]                                       | 1.392122446  | 3.434641776  | 12.8424621  | 0.000338841 | 0.004396197 | 2.636996308  | 3.138979644  | 4.153899108  | 3.86004218   | 2.686482162  |
| ENSG00000164308 | ERAP2         | endoplasmic reticulum aminopeptidase 2 [Source:HGNC Symbol;Acc:29499]                           | 1.495237087  | 5.811854181  | 12.84485068 | 0.000338409 | 0.004396197 | 5.141500364  | 5.284225168  | 5.807720546  | 6.989825366  | 4.534454294  |
| ENSG00000256604 | AC093668.2    |                                                                                                 | 2.034174396  | -0.235335893 | 12.84117614 | 0.000339074 | 0.004396197 | -0.856736938 | -0.855949929 | 0.036330944  | 0.192266291  | -0.506781561 |
| ENSG00000267990 | CTD-3187F8.15 |                                                                                                 | 2.493168999  | 0.308541187  | 12.84264824 | 0.000338808 | 0.004396197 | -1.132483902 | -0.713501401 | -0.99931534  | 1.069111613  | 1.177268129  |
| ENSG00000180953 | ST20          | suppressor of tumorigenicity 20 [Source:HGNC Symbol;Acc:33520]                                  | 1.815896955  | 2.395246707  | 12.83846565 | 0.000339566 | 0.004399321 | 1.210071084  | 1.634124584  | 2.202847421  | 3.03386134   | 2.968901188  |
| ENSG00000169604 | ANTXR1        | anthrax toxin receptor 1 [Source:HGNC Symbol;Acc:21014]                                         | -3.983310485 | -0.068324457 | 12.83368774 | 0.000340434 | 0.004404069 | 1.37945544   | 0.664086661  | -7.002070102 | -4.730697034 | -2.060109799 |
| ENSG00000204681 | GABBR1        | gamma-aminobutyric acid (GABA) B receptor, 1 [Source:HGNC Symbol;Acc:4070]                      | 1.181820448  | 6.584013646  | 12.83459063 | 0.00034027  | 0.004404069 | 5.736790496  | 6.112979157  | 7.000833835  | 7.199266765  | 6.354668562  |
| ENSG00000181619 | GPR135        | G protein-coupled receptor 135 [Source:HGNC Symbol;Acc:19991]                                   | 1.964604081  | 0.699375221  | 12.8319526  | 0.00034075  | 0.004404909 | -0.196880952 | 0.498306264  | 0.778135316  | 1.224680533  | 0.584199832  |
| ENSG00000173846 | PLK3          | polo-like kinase 3 [Source:HGNC Symbol;Acc:2154]                                                | 1.51245256   | 5.4506114    | 12.82691113 | 0.000341669 | 0.004413543 | 4.432399102  | 4.781402895  | 5.273532496  | 6.62718374   | 4.987549827  |

|                 |               |                                                                                                                     |              |             |             |             |             |              |              |              |              |             |
|-----------------|---------------|---------------------------------------------------------------------------------------------------------------------|--------------|-------------|-------------|-------------|-------------|--------------|--------------|--------------|--------------|-------------|
| ENSG0000004478  | FKBP4         | FK506 binding protein 4, 59kDa [Source:HGNC Symbol;Acc:3720]                                                        | -1.220090496 | 5.176774021 | 12.82011668 | 0.000342912 | 0.004426343 | 5.813550226  | 5.686396784  | 4.300507637  | 4.626653563  | 4.828367502 |
| ENSG00000143502 | SUSD4         | sushi domain containing 4 [Source:HGNC Symbol;Acc:25470]                                                            | 1.919700664  | 0.964187851 | 12.81294911 | 0.000344229 | 0.004440068 | -0.250832646 | 0.610915408  | 1.674560554  | 0.696304622  | 1.218946104 |
| ENSG00000014257 | ACPP          | acid phosphatase, prostate [Source:HGNC Symbol;Acc:125]                                                             | 1.578368556  | 4.709364907 | 12.80652097 | 0.000345413 | 0.004452078 | 3.598444871  | 4.046212993  | 4.357069198  | 5.560401742  | 5.096376185 |
| ENSG00000213240 | NOTCH2NL      | notch 2 N-terminal like [Source:HGNC Symbol;Acc:31862]                                                              | 1.498766883  | 3.874107592 | 12.80280474 | 0.0003461   | 0.004457657 | 3.047861816  | 3.234355     | 3.926726325  | 4.630137237  | 3.943532595 |
| ENSG00000188690 | UROS          | uroporphyrinogen III synthase [Source:HGNC Symbol;Acc:12592]                                                        | -1.162126904 | 5.356032295 | 12.79319338 | 0.000347883 | 0.004477333 | 5.891109787  | 5.996668693  | 4.874017897  | 4.414762411  | 4.936936424 |
| ENSG00000149548 | CCDC15        | coiled-coil domain containing 15 [Source:HGNC Symbol;Acc:25798]                                                     | -1.636492755 | 2.393366915 | 12.78315182 | 0.000349755 | 0.004498133 | 3.11338967   | 3.323814258  | 1.501363361  | 0.265774258  | 1.702990823 |
| ENSG00000090861 | AARS          | alanyl-tRNA synthetase [Source:HGNC Symbol;Acc:20]                                                                  | -1.18353948  | 5.891745775 | 12.76949542 | 0.000352318 | 0.004527775 | 6.390758198  | 6.432242965  | 5.48816597   | 4.819023673  | 5.733389055 |
| ENSG00000064547 | LPAR2         | lysophosphatidic acid receptor 2 [Source:HGNC Symbol;Acc:3168]                                                      | 1.177599808  | 5.702562343 | 12.76519096 | 0.00035313  | 0.004534886 | 4.881144984  | 4.837449986  | 5.703420094  | 6.25257982   | 6.203913664 |
| ENSG00000253293 | HOXA10        | homeobox A10 [Source:HGNC Symbol;Acc:5100]                                                                          | -1.771079877 | 1.810708303 | 12.75980158 | 0.000354148 | 0.004544646 | 2.446729819  | 2.329059307  | -0.059127673 | -0.406691783 | 2.3444256   |
| ENSG00000155090 | KLF10         | Kruppel-like factor 10 [Source:HGNC Symbol;Acc:11810]                                                               | 1.694917882  | 7.381366537 | 12.75763194 | 0.000354559 | 0.004546597 | 6.530750089  | 6.290435609  | 7.303909608  | 8.757847616  | 6.163794847 |
| ENSG00000204397 | CARD16        | caspase recruitment domain family, member 16 [Source:HGNC Symbol;Acc:33701]                                         | 1.338337534  | 5.632560941 | 12.75570575 | 0.000354925 | 0.00454796  | 4.763607814  | 5.032033685  | 5.557186035  | 6.384769319  | 5.839068896 |
| ENSG00000076067 | RBMS2         | RNA binding motif, single stranded interacting protein 2 [Source:HGNC Symbol;Acc:9909]                              | 1.713627297  | 2.253852834 | 12.74467552 | 0.000357024 | 0.004568191 | 1.084982398  | 1.551875699  | 2.192523064  | 2.806428868  | 2.800681624 |
| ENSG00000182795 | C1orf116      | chromosome 1 open reading frame 116 [Source:HGNC Symbol;Acc:28667]                                                  | 2.007649926  | 0.517612557 | 12.74582776 | 0.000356804 | 0.004568191 | -0.196880952 | 0.016063025  | 0.28980717   | 1.224680533  | 0.518960621 |
| ENSG00000214274 | ANG           | angiogenin, ribonuclease, RNase A family, 5 [Source:HGNC Symbol;Acc:483]                                            | 2.140073655  | 0.63909667  | 12.73359747 | 0.000359145 | 0.004591982 | -0.196880952 | -0.068151468 | -0.010608983 | 1.446384807  | 0.973207307 |
| ENSG00000257743 | RP11-1220K2.2 | Putative inactive maltase-glucoamylase-like protein LOC93432 [Source:UniProtKB/Swiss-Prot;Acc:Q2M2H8]               | 2.34310796   | 0.198345154 | 12.73093001 | 0.000359658 | 0.004595189 | -0.250832646 | -2.076136033 | -0.520331194 | 0.669468625  | 1.090116303 |
| ENSG00000203306 | AP001007.1    |                                                                                                                     | 1.703457018  | 3.705838066 | 12.72635032 | 0.000360539 | 0.00459976  | 2.599373756  | 3.086385644  | 3.477270088  | 4.730917879  | 3.666906879 |
| ENSG00000109272 | PF4V1         | platelet factor 4 variant 1 [Source:HGNC Symbol;Acc:8862]                                                           | 1.728622347  | 2.36619712  | 12.72751753 | 0.000360314 | 0.00459976  | 0.769809504  | 1.724506406  | 2.404162378  | 2.498689587  | 3.260920169 |
| ENSG00000261827 | RP11-340F14.5 |                                                                                                                     | 2.053894389  | 2.660945383 | 12.72441608 | 0.000360913 | 0.004601176 | 1.229903997  | 2.107040151  | 2.192523064  | 3.582852389  | 3.02284327  |
| ENSG00000130826 | DKC1          | dyskeratosis congenita 1, dyskerin [Source:HGNC Symbol;Acc:2890]                                                    | -1.207570722 | 6.190735838 | 12.72210589 | 0.000361359 | 0.00460352  | 6.738416765  | 6.725118065  | 5.849390023  | 5.173171083  | 5.873730193 |
| ENSG00000167670 | CHAF1A        | chromatin assembly factor 1, subunit A (p150) [Source:HGNC Symbol;Acc:1910]                                         | -1.2087536   | 4.961713303 | 12.71347835 | 0.00036303  | 0.004621453 | 5.402953745  | 5.576282205  | 3.966655493  | 4.231969659  | 4.957087522 |
| ENSG00000136161 | RCBT2         | regulator of chromosome condensation (RCC1) and BTB (POZ) domain containing protein 2 [Source:HGNC Symbol;Acc:1914] | 1.278457538  | 5.807372276 | 12.7098227  | 0.00036374  | 0.004627141 | 4.810461175  | 5.318832075  | 5.854310438  | 6.383221785  | 6.13822683  |
| ENSG00000078399 | HOXA9         | homeobox A9 [Source:HGNC Symbol;Acc:5109]                                                                           | -1.957917665 | 1.403204509 | 12.69788625 | 0.000366069 | 0.004653399 | 2.093195522  | 1.797710702  | -0.82139248  | -1.70641174  | 2.120832889 |
| ENSG00000112210 | RAB23         | RAB23, member RAS oncogene family [Source:HGNC Symbol;Acc:14263]                                                    | -1.814867972 | 1.595945067 | 12.69108855 | 0.000367402 | 0.004666967 | 2.332130562  | 2.591720352  | -0.10933503  | -0.956081001 | 1.198257616 |
| ENSG00000177706 | FAM20C        | family with sequence similarity 20, member C [Source:HGNC Symbol;Acc:22140]                                         | 1.920780433  | 3.78234343  | 12.68696284 | 0.000368214 | 0.004673893 | 1.968888231  | 2.871498754  | 3.009154251  | 4.761417889  | 4.4668719   |
| ENSG00000266389 | CTB-4116.1    |                                                                                                                     | 1.944182561  | 0.870402418 | 12.68428249 | 0.000368742 | 0.004677216 | 0.174562846  | -0.112176905 | 0.884581662  | 1.493047208  | 1.11240278  |
| ENSG00000141505 | ASGR1         | asialoglycoprotein receptor 1 [Source:HGNC Symbol;Acc:742]                                                          | 1.653037796  | 4.072747936 | 12.68257759 | 0.000369078 | 0.004678102 | 2.758036868  | 3.55604389   | 3.98172333   | 5.150304328  | 3.806723591 |
| ENSG00000214517 | PPME1         | protein phosphatase methyltransferase 1 [Source:HGNC Symbol;Acc:30178]                                              | -1.178020664 | 4.763948154 | 12.67964803 | 0.000369657 | 0.004678681 | 5.221688852  | 5.480411926  | 4.034700554  | 3.892314563  | 4.481928444 |
| ENSG00000241163 | LINC00877     | long intergenic non-protein coding RNA 877 [Source:HGNC Symbol;Acc:27706]                                           | 1.873159476  | 3.691798458 | 12.68020165 | 0.000369548 | 0.004678681 | 2.480234919  | 2.66528446   | 3.149202463  | 4.922089668  | 3.72229752  |
| ENSG00000091127 | PUS7          | pseudouridylylase synthase 7 homolog (S. cerevisiae) [Source:HGNC Symbol;Acc:26033]                                 | -1.378445568 | 3.579652245 | 12.6710406  | 0.000371363 | 0.004696883 | 4.304969154  | 4.30244184   | 2.847469331  | 2.258736156  | 2.999117651 |
| ENSG00000257576 | RP11-153M3.1  |                                                                                                                     | -1.370371515 | 3.682623088 | 12.6650374  | 0.000372557 | 0.004708596 | 4.406491176  | 4.277066647  | 2.918097532  | 2.36290873   | 3.407808836 |
| ENSG00000174516 | PELI3         | pellino E3 ubiquitin protein ligase family member 3 [Source:HGNC Symbol;Acc:30010]                                  | 1.419353795  | 3.575558035 | 12.66143836 | 0.000373275 | 0.004710885 | 2.599373756  | 3.0717027    | 3.859795663  | 4.144544252  | 3.663137444 |
| ENSG00000100767 | PAPLN         | papilin, proteoglycan-like sulfated glycoprotein [Source:HGNC Symbol;Acc:19262]                                     | 1.961607092  | 0.915856499 | 12.66203924 | 0.000373155 | 0.004710885 | 0.133035942  | -0.30308518  | -0.010608983 | 0.917704421  | 2.14265341  |

|                 |               |                                                                                                                  |              |             |             |             |             |              |              |              |              |              |
|-----------------|---------------|------------------------------------------------------------------------------------------------------------------|--------------|-------------|-------------|-------------|-------------|--------------|--------------|--------------|--------------|--------------|
| ENSG00000249506 | ZEB2P1        | zinc finger E-box binding homeobox 2 pseudogene 1 [Source:HGNC Symbol;Acc:33346]                                 | 2.034111827  | 1.947513845 | 12.65958675 | 0.000373645 | 0.004712166 | 0.874315765  | 1.109650305  | 1.450281721  | 2.848906753  | 2.3444256    |
| ENSG00000123360 | PDE1B         | phosphodiesterase 1B, calmodulin-dependent [Source:HGNC Symbol;Acc:8775]                                         | 1.607547784  | 3.180072005 | 12.65682392 | 0.000374197 | 0.004715746 | 2.266432806  | 2.564011614  | 3.170400428  | 3.995855935  | 3.225574983  |
| ENSG00000224505 | AC002117.1    |                                                                                                                  | 1.751183663  | 1.294498072 | 12.65333721 | 0.000374896 | 0.00472116  | 0.435934254  | 0.740340508  | 1.980862385  | 1.523337554  | 1.11240278   |
| ENSG00000234119 | AC079248.1    |                                                                                                                  | -1.174949186 | 4.65831754  | 12.6399748  | 0.000377585 | 0.004751617 | 5.243804382  | 5.294800048  | 4.074600823  | 3.628851426  | 4.292408717  |
| ENSG00000082516 | GEMIN5        | gem (nuclear organelle) associated protein 5 [Source:HGNC Symbol;Acc:20043]                                      | -1.234517984 | 4.627006779 | 12.63094852 | 0.000379413 | 0.004771195 | 5.245023138  | 5.221313549  | 4.107944152  | 3.340707202  | 4.368453247  |
| ENSG00000140678 | ITGAX         | integrin, alpha X (complement component 3 receptor 4 subunit) [Source:HGNC Symbol;Acc:6152]                      | 1.849088227  | 8.418318018 | 12.62865857 | 0.000379878 | 0.004773624 | 6.867468202  | 7.374025033  | 8.102342888  | 9.549294248  | 8.656600438  |
| ENSG00000183814 | LIN9          | lin-9 homolog [C. elegans] [Source:HGNC Symbol;Acc:30830]                                                        | -1.487049781 | 3.066136482 | 12.62469431 | 0.000380684 | 0.004780336 | 3.79763378   | 3.752958575  | 2.253389193  | 1.27894994   | 2.807527639  |
| ENSG00000135740 | SLC9A5        | solute carrier family 9, subfamily A (NHES, cation proton antiporter 5), member 5 [Source:HGNC Symbol;Acc:11078] | 1.921577777  | 0.130628398 | 12.58600148 | 0.000388647 | 0.004876836 | -0.489407866 | 0.016063025  | 0.778135316  | -0.099242291 | -0.257803757 |
| ENSG00000174442 | ZWILCH        | zwilch kinetochore protein [Source:HGNC Symbol;Acc:25468]                                                        | -1.226600061 | 4.387805595 | 12.56957279 | 0.000392078 | 0.004916381 | 4.970796966  | 4.972680213  | 3.634266777  | 3.284338193  | 4.282615004  |
| ENSG00000272065 | U91328.20     |                                                                                                                  | 2.586473339  | 0.062400846 | 12.55324438 | 0.000395519 | 0.004955986 | -1.350769713 | -0.782968247 | -0.907612816 | 1.089500161  | 0.378903451  |
| ENSG00000235568 | NFAM1         | NFAT activating protein with ITAM motif 1 [Source:HGNC Symbol;Acc:29872]                                         | 1.636856558  | 7.743019642 | 12.54638673 | 0.000396973 | 0.004970659 | 6.034740035  | 6.906022708  | 7.529328845  | 8.689995164  | 8.168172141  |
| ENSG00000164136 | IL15          | interleukin 15 [Source:HGNC Symbol;Acc:5977]                                                                     | 1.779426577  | 3.780366702 | 12.54285993 | 0.000397723 | 0.00497392  | 2.744312733  | 2.84296036   | 3.357618296  | 4.795946491  | 4.045503588  |
| ENSG00000254952 | AP001257.1    |                                                                                                                  | 2.724902313  | 0.30788238  | 12.54249759 | 0.0003978   | 0.00497392  | -1.921450438 | -0.252938016 | -0.10933503  | 1.446384807  | 0.182236344  |
| ENSG00000183486 | MX2           | myxovirus (influenza virus) resistance 2 (mouse) [Source:HGNC Symbol;Acc:7533]                                   | 1.325102861  | 6.673131821 | 12.53149358 | 0.00040015  | 0.004999737 | 5.499046223  | 5.990827216  | 6.562588821  | 7.401362161  | 7.104144929  |
| ENSG00000173083 | HPSE          | heparanase [Source:HGNC Symbol;Acc:5164]                                                                         | 1.583412617  | 5.679158659 | 12.52704695 | 0.000401103 | 0.005008085 | 3.846627143  | 5.108353807  | 5.45939078   | 6.275562429  | 6.419224707  |
| ENSG00000116221 | MRPL37        | mitochondrial ribosomal protein L37 [Source:HGNC Symbol;Acc:14034]                                               | -1.142165088 | 5.522926902 | 12.52012736 | 0.000402591 | 0.005023094 | 6.1075688    | 6.054440781  | 4.841348169  | 4.865577827  | 5.184477247  |
| ENSG00000239392 | RP11-537H15.4 |                                                                                                                  | 1.452890996  | 3.673197988 | 12.51852616 | 0.000402937 | 0.00502383  | 2.894768068  | 3.056868784  | 3.697694186  | 4.294777486  | 3.921613159  |
| ENSG00000173207 | CKS1B         | CDC28 protein kinase regulatory subunit 1B [Source:HGNC Symbol;Acc:19083]                                        | -1.585480241 | 2.218207792 | 12.51616941 | 0.000403445 | 0.005026601 | 2.913284701  | 2.910527228  | 1.120696904  | 0.642123966  | 2.064792492  |
| ENSG00000163421 | PROK2         | prokineticin 2 [Source:HGNC Symbol;Acc:18455]                                                                    | 2.236958     | 4.621136132 | 12.51120649 | 0.000404518 | 0.005036396 | 2.850615345  | 2.69752161   | 2.880002288  | 5.394153653  | 5.899590916  |
| ENSG00000237188 | RP11-337C18.8 |                                                                                                                  | 1.874509025  | 0.530851514 | 12.50518626 | 0.000405824 | 0.00504907  | 0.000762307  | 0.133828548  | 0.602113338  | 0.773941511  | 0.706443614  |
| ENSG00000229749 | COTL1P1       | coactosin-like 1 (Dictyostelium) pseudogene 1 [Source:HGNC Symbol;Acc:2086]                                      | 1.733043007  | 1.727830545 | 12.49273391 | 0.000408538 | 0.005079237 | 0.94800933   | 1.128690501  | 1.907011864  | 2.294302704  | 1.81594051   |
| ENSG00000231486 | AC096579.7    |                                                                                                                  | -1.717495538 | 3.605895177 | 12.47865319 | 0.000411629 | 0.005114044 | 4.787224689  | 3.53121644   | 2.321298905  | 1.970751589  | 3.647960442  |
| ENSG00000233429 | HOTAIRM1      | HOXA transcript antisense RNA, myeloid-specific 1 [Source:HGNC Symbol;Acc:37117]                                 | 1.414261069  | 3.691252684 | 12.46340358 | 0.000415003 | 0.005152319 | 2.876010686  | 2.995959146  | 3.826798551  | 4.406660334  | 3.765128041  |
| ENSG00000058804 | NDC1          | NDC1 transmembrane nucleoporin [Source:HGNC Symbol;Acc:25525]                                                    | -1.169976088 | 5.264838534 | 12.43731888 | 0.000420839 | 0.005221086 | 5.754870226  | 5.856654423  | 4.799442354  | 4.097503316  | 5.13090081   |
| ENSG00000162444 | RBP7          | retinol binding protein 7, cellular [Source:HGNC Symbol;Acc:30316]                                               | 1.443606757  | 4.108518989 | 12.43473438 | 0.000421422 | 0.005224624 | 3.11338967   | 3.703019536  | 4.241637747  | 4.88028041   | 3.992417811  |
| ENSG00000215769 | hsa-mir-6080  | hsa-mir-6080 [Source:miRBase;Acc:MI0020357]                                                                      | 1.409031393  | 3.5012135   | 12.43281141 | 0.000421856 | 0.005226315 | 2.75119112   | 2.831385036  | 3.747912684  | 4.009294922  | 3.696712964  |
| ENSG00000099889 | ARVCF         | armadillo repeat gene deleted in velocardiiofacial syndrome [Source:HGNC Symbol;Acc:728]                         | -1.394796575 | 3.665688748 | 12.42202469 | 0.0004243   | 0.005252882 | 4.478721339  | 4.337642778  | 2.507726234  | 2.704366551  | 3.074840951  |
| ENSG00000116729 | WLS           | wntless Wnt ligand secretion mediator [Source:HGNC Symbol;Acc:30238]                                             | 1.932433898  | 4.028494122 | 12.41462521 | 0.000425984 | 0.00527002  | 2.114689606  | 3.061830389  | 3.19129143   | 4.912108157  | 4.877993003  |
| ENSG00000156509 | FBXO43        | F-box protein 43 [Source:HGNC Symbol;Acc:28521]                                                                  | -2.209270339 | 0.867467863 | 12.40738913 | 0.000427638 | 0.005286754 | 1.531025871  | 1.761572815  | -3.766908349 | -1.70641174  | 1.11240278   |
| ENSG00000243970 | PPIEL         | peptidylprolyl isomerase E-like pseudogene [Source:HGNC Symbol;Acc:33195]                                        | 1.939898458  | 0.064990044 | 12.38887608 | 0.000431899 | 0.005335672 | -0.698419327 | 0.171040209  | 0.9100098    | 0.03296005   | -1.70800759  |
| ENSG00000062282 | DGAT2         | diacylglycerol O-acyltransferase 2 [Source:HGNC Symbol;Acc:16940]                                                | 1.71128319   | 4.227529738 | 12.38581017 | 0.000432609 | 0.005340681 | 2.949619895  | 3.516835107  | 3.786179228  | 5.246499197  | 4.488333455  |
| ENSG00000253522 | MIR146A       | microRNA 146a [Source:HGNC Symbol;Acc:31533]                                                                     | 1.911239854  | 0.844190767 | 12.3794129  | 0.000434094 | 0.005355245 | -0.365194284 | 0.664086661  | 1.450281721  | 0.940331404  | 0.763888603  |
| ENSG00000141096 | DPEP3         | dipeptidase 3 [Source:HGNC Symbol;Acc:23029]                                                                     | 2.43028119   | 0.511616578 | 12.37146426 | 0.000435946 | 0.005374315 | -0.046168491 | -1.629706251 | 0.081791624  | 1.508271876  | 0.735452007  |
| ENSG00000065154 | OAT           | ornithine aminotransferase [Source:HGNC Symbol;Acc:8091]                                                         | -1.247855905 | 5.394632525 | 12.3648888  | 0.000437484 | 0.005389491 | 5.899647647  | 6.077284614  | 4.326707234  | 4.786611257  | 5.134988789  |
| ENSG00000177469 | PTRF          | polymerase I and transcript release factor [Source:HGNC Symbol;Acc:9688]                                         | -1.742558437 | 2.724155718 | 12.35006318 | 0.000440972 | 0.00542865  | 3.594625625  | 3.476530889  | 0.036330944  | 1.638513559  | 2.426764636  |

|                 |               |                                                                                                                   |              |              |             |             |             |              |              |              |              |              |
|-----------------|---------------|-------------------------------------------------------------------------------------------------------------------|--------------|--------------|-------------|-------------|-------------|--------------|--------------|--------------|--------------|--------------|
| ENSG00000091986 | CCDC80        | coiled-coil domain containing 80<br>[Source:HGNC Symbol;Acc:30649]                                                | -2.623595275 | 0.562397597  | 12.34642537 | 0.000441832 | 0.005431621 | 2.071376358  | 1.355744383  | -2.539967122 | -4.730697034 | -3.221241555 |
| ENSG00000130529 | TRPM4         | transient receptor potential cation channel, subfamily M, member 4 [Source:HGNC Symbol;Acc:17993]                 | 2.123651998  | 1.17274207   | 12.3475184  | 0.000441573 | 0.005431621 | 0.534915169  | 0.438524285  | 0.328039018  | 2.258736156  | 1.090116303  |
| ENSG00000169385 | RNASE2        | ribonuclease, RNase A family, 2 (liver, eosinophil-derived neurotoxin)<br>[Source:HGNC Symbol;Acc:10045]          | -1.383682311 | 5.66496551   | 12.32623319 | 0.000446637 | 0.00548685  | 5.789528825  | 6.126066145  | 3.761945509  | 4.747050861  | 6.456724691  |
| ENSG00000076864 | RAP1GAP       | RAP1 GTPase activating protein<br>[Source:HGNC Symbol;Acc:9858]                                                   | -2.020032251 | 1.537757665  | 12.32448757 | 0.000447055 | 0.005488143 | 2.217603867  | 2.948527637  | -0.059127673 | -2.97427061  | -0.506781561 |
| ENSG00000171943 | SRGAP2C       | SLIT-ROBO Rho GTPase activating protein 2C disrupted in renal carcinoma 2<br>[Source:HGNC Symbol;Acc:30584]       | 1.904986152  | 1.161954002  | 12.31676513 | 0.000448908 | 0.005507044 | 0.329658892  | 0.277241192  | 0.805492218  | 1.55300499   | 1.920685729  |
| ENSG00000138463 | DIRC2         | disrupted in renal carcinoma 2<br>[Source:HGNC Symbol;Acc:16628]                                                  | 1.534911559  | 3.716107894  | 12.30797636 | 0.000451027 | 0.005529172 | 2.70942011   | 3.120075649  | 3.664462604  | 4.470237611  | 3.940421563  |
| ENSG00000213070 | HMBG3P6       | high mobility group box 3 pseudogene 6<br>[Source:HGNC Symbol;Acc:39283]                                          | -1.846453065 | 2.663931729  | 12.30218711 | 0.000452428 | 0.005542478 | 3.579246723  | 3.415820346  | 0.168628767  | 1.493047208  | 2.267069113  |
| ENSG00000110628 | SLC22A18      | solute carrier family 22, member 18<br>[Source:HGNC Symbol;Acc:10964]                                             | 1.49106074   | 3.670710947  | 12.29759308 | 0.000453543 | 0.005552262 | 2.785099575  | 3.03180153   | 3.70497617   | 4.373789206  | 3.863670386  |
| ENSG00000156299 | TIAM1         | T-cell lymphoma invasion and metastasis 1<br>[Source:HGNC Symbol;Acc:11805]                                       | 1.253542114  | 5.803382552  | 12.27529147 | 0.000458995 | 0.005615092 | 4.443058246  | 5.337364427  | 6.197975461  | 6.335473191  | 5.968406654  |
| ENSG00000257433 | RP1-197B17.3  |                                                                                                                   | 1.779120517  | 0.749494718  | 12.27075288 | 0.000460113 | 0.005624845 | 0.254194054  | 0.242702272  | 1.030832979  | 0.847612951  | 0.948644093  |
| ENSG00000091106 | NLR4          | NLR family, CARD domain containing 4<br>[Source:HGNC Symbol;Acc:16412]                                            | 1.219057048  | 5.057098541  | 12.24954281 | 0.000465372 | 0.005685183 | 3.865767927  | 4.528939153  | 5.133484478  | 5.235105793  | 5.80184113   |
| ENSG00000120594 | PLXDC2        | plexin domain containing 2 [Source:HGNC Symbol;Acc:21013]                                                         | 1.481419937  | 6.665080307  | 12.24086798 | 0.000467541 | 0.005707704 | 4.860619147  | 5.853796571  | 6.397680654  | 7.500332646  | 7.275025896  |
| ENSG00000145391 | SETD7         | SET domain containing (lysine methyltransferase) 7 [Source:HGNC Symbol;Acc:30412]                                 | 1.257374723  | 5.410591166  | 12.23103395 | 0.000470011 | 0.005733878 | 4.314288266  | 4.830198586  | 5.397814138  | 5.97902694   | 5.878614521  |
| ENSG00000211945 | IGHV1-18      | immunoglobulin heavy variable 1-18<br>[Source:HGNC Symbol;Acc:5549]                                               | -2.421162617 | 6.303414066  | 12.21478538 | 0.000474123 | 0.005778119 | 7.558159384  | 6.744534096  | 2.263288494  | 5.293392599  | 5.778511916  |
| ENSG00000196678 | ERI2          | ERI1 exoribonuclease family member 2<br>[Source:HGNC Symbol;Acc:30541]                                            | -1.350997803 | 3.911485982  | 12.21280848 | 0.000474625 | 0.005778119 | 4.497250847  | 4.451660263  | 2.657864658  | 2.98027543   | 4.025090588  |
| ENSG00000227398 | KIF9-AS1      | KIF9 antisense RNA 1 [Source:HGNC Symbol;Acc:26822]                                                               | 1.737755623  | 0.958836467  | 12.21389208 | 0.00047435  | 0.005778119 | 0.365960855  | 0.468724906  | 1.265630948  | 1.12943269   | 1.134350211  |
| ENSG00000187017 | ESPN          | espin [Source:HGNC Symbol;Acc:13281]                                                                              | -1.921869833 | 1.767813769  | 12.20982157 | 0.000475386 | 0.005783366 | 2.723478589  | 2.865836059  | 0.437007322  | -2.419096061 | 0.341656497  |
| ENSG00000143653 | SCCPDH        | saccharopine dehydrogenase (putative)<br>[Source:HGNC Symbol;Acc:24275]                                           | -1.15297431  | 5.07313092   | 12.19624388 | 0.000478858 | 0.005821578 | 5.62140306   | 5.614772957  | 4.273823438  | 4.229675155  | 4.986041891  |
| ENSG00000173409 | ARV1          | ARV1 homolog (S. cerevisiae) [Source:HGNC Symbol;Acc:29561]                                                       | -1.250815775 | 4.443271932  | 12.18749742 | 0.000481109 | 0.00584489  | 5.237695108  | 4.927185486  | 3.836777169  | 3.301918251  | 4.019204856  |
| ENSG00000267102 | RP11-686D22.7 |                                                                                                                   | 1.824142403  | 1.107443669  | 12.17694365 | 0.000483839 | 0.005873988 | 0.502670228  | 0.095631612  | 1.265630948  | 1.538247531  | 1.446507348  |
| ENSG00000155465 | SLC7A7        | solute carrier family 7 (amino acid transporter light chain, y+L system), member 7 [Source:HGNC Symbol;Acc:11065] | 1.594929854  | 7.779662061  | 12.15783644 | 0.00048882  | 0.005930369 | 6.160843748  | 7.046555665  | 7.691850148  | 8.819508299  | 7.883339374  |
| ENSG00000116016 | EPAS1         | endothelial PAS domain protein 1<br>[Source:HGNC Symbol;Acc:3374]                                                 | -1.683751038 | 2.037085416  | 12.15625241 | 0.000489236 | 0.005931308 | 3.145070257  | 2.837184307  | 0.471574783  | 0.669468625  | 0.303422373  |
| ENSG00000127249 | ATP13A4       | ATPase type 13A4 [Source:HGNC Symbol;Acc:25422]                                                                   | 1.81114913   | 0.413350528  | 12.14336066 | 0.000492629 | 0.005968327 | 0.090278201  | 0.095631612  | 0.9100098    | 0.894716898  | -0.9858258   |
| ENSG00000197182 | FLI27365      | hsa-mir-4763<br>[Source:miRBase;Acc:MI0017404]                                                                    | 2.038098465  | 0.862792755  | 12.12600553 | 0.000497235 | 0.006015825 | 0.597320328  | 0.016063025  | 0.437007322  | 1.679439471  | 0.791775511  |
| ENSG00000240704 | KLF7P1        | kruppel-like factor 7 pseudogene 1<br>[Source:HGNC Symbol;Acc:17207]                                              | 2.276725643  | -0.074419399 | 12.12663119 | 0.000497068 | 0.006015825 | -2.108017771 | -0.355038393 | 0.401591237  | 0.192266291  | 0.002986071  |
| ENSG00000105369 | CD79A         | CD79a molecule, immunoglobulin-associated alpha [Source:HGNC Symbol;Acc:1698]                                     | -1.258490326 | 6.790902886  | 12.1231962  | 0.000497985 | 0.006020746 | 7.485773789  | 6.935380982  | 6.186966114  | 5.963231562  | 6.864225488  |
| ENSG00000118985 | ELL2          | elongation factor, RNA polymerase II, 2<br>[Source:HGNC Symbol;Acc:17064]                                         | -1.237707969 | 4.538191019  | 12.11028088 | 0.000501446 | 0.006057313 | 5.109740417  | 5.160167117  | 3.547813796  | 3.761832794  | 4.345117047  |
| ENSG00000180539 | C9orf139      | chromosome 9 open reading frame 139<br>[Source:HGNC Symbol;Acc:31426]                                             | 1.382811566  | 3.316345342  | 12.10933808 | 0.000501699 | 0.006057313 | 2.177314774  | 2.658749679  | 3.71583069   | 3.497693538  | 3.837151666  |
| ENSG00000139354 | GAS2L3        | growth arrest-specific 2 like 3 [Source:HGNC Symbol;Acc:27475]                                                    | -1.881703392 | 2.586708604  | 12.10427917 | 0.000503062 | 0.006069595 | 3.415706374  | 3.392378661  | -0.907612816 | 1.36509501   | 2.444441111  |
| ENSG00000124224 | PPP4R1L       | protein phosphatase 4, regulatory subunit 1-like [Source:HGNC Symbol;Acc:15755]                                   | 1.623404946  | 3.605129127  | 12.0974017  | 0.000504921 | 0.00608784  | 2.6444045    | 2.69752161   | 3.324906709  | 4.41071706   | 4.048396296  |
| ENSG00000181409 | AATK          | apoptosis-associated tyrosine kinase<br>[Source:HGNC Symbol;Acc:21]                                               | 1.256680572  | 4.597846185  | 12.09109012 | 0.000506633 | 0.00610429  | 3.833724066  | 4.317040508  | 4.88207103   | 5.320598436  | 4.099497077  |
| ENSG00000224940 | PRRT4         | proline-rich transmembrane protein 4<br>[Source:HGNC Symbol;Acc:37280]                                            | -1.982195925 | 2.964780158  | 12.08770129 | 0.000507555 | 0.0061112   | 3.547988195  | 1.832965453  | 0.168628767  | 0.074465887  | 4.420735849  |
| ENSG00000162078 | ZG16B         | zymogen granule protein 16B [Source:HGNC Symbol;Acc:30456]                                                        | 2.000719517  | 0.428524905  | 12.08466284 | 0.000508383 | 0.006116972 | -0.698419327 | 0.095631612  | 0.328039018  | 0.984547783  | 0.615745481  |

|                 |             |                                                                                                              |              |              |             |             |             |              |              |              |              |              |
|-----------------|-------------|--------------------------------------------------------------------------------------------------------------|--------------|--------------|-------------|-------------|-------------|--------------|--------------|--------------|--------------|--------------|
| ENSG00000115919 | KYNU        | kynureninase [Source:HGNC Symbol;Acc:6469]                                                                   | 1.463057668  | 4.174348407  | 12.07837189 | 0.000510101 | 0.006133443 | 3.236140248  | 3.527634524  | 4.066143174  | 5.023588668  | 4.304558099  |
| ENSG00000268849 | SIGLEC2P    | sialic acid binding Ig-like lectin 22, pseudogene [Source:HGNC Symbol;Acc:15611]                             | 1.896411371  | 2.361894252  | 12.057173   | 0.000515935 | 0.006199339 | 0.874315765  | 1.922971788  | 2.243421497  | 3.188355007  | 2.5705316    |
| ENSG00000111845 | PAK1P1      | PAK1 interacting protein 1 [Source:HGNC Symbol;Acc:20882]                                                    | -1.237958748 | 4.203650755  | 12.0450898  | 0.00051929  | 0.006235385 | 4.86696595   | 4.766284479  | 3.420897078  | 3.193073383  | 3.962059208  |
| ENSG00000213462 | ERV3-1      | endogenous retrovirus group 3, member 1 [Source:HGNC Symbol;Acc:3454]                                        | 1.498216134  | 3.690460327  | 12.03248677 | 0.000522813 | 0.006273396 | 2.831271105  | 3.061830389  | 3.70497617   | 4.468292652  | 3.768640511  |
| ENSG00000080839 | RBL1        | retinoblastoma-like 1 (p107) [Source:HGNC Symbol;Acc:9893]                                                   | -1.245891975 | 4.934048856  | 12.02735907 | 0.000524253 | 0.006286381 | 5.398579432  | 5.58492489   | 4.535127562  | 3.553798585  | 4.77871694   |
| ENSG00000113594 | LIFR        | leukemia inhibitory factor receptor alpha [Source:HGNC Symbol;Acc:6597]                                      | -2.537908371 | 0.526390082  | 12.01815483 | 0.000526848 | 0.006313189 | 2.082327188  | 1.237938318  | -3.766908349 | -2.670141381 | -3.754655114 |
| ENSG00000186204 | CYP4F12     | cytochrome P450, family 4, subfamily F, polypeptide 12 [Source:HGNC Symbol;Acc:18857]                        | 2.069881     | -0.171579375 | 12.01454043 | 0.000527871 | 0.00632113  | -1.132483902 | -0.464918547 | 0.437007322  | -1.231517591 | 0.303422373  |
| ENSG00000239998 | LILRA2      | leukocyte immunoglobulin-like receptor, subfamily A (with TM domain), member 2 [Source:HGNC Symbol;Acc:6603] | 1.563597014  | 6.565692753  | 12.00963569 | 0.000529262 | 0.006333466 | 5.133625684  | 5.810972116  | 6.154754978  | 7.598292908  | 6.871185677  |
| ENSG00000117586 | TNFSF4      | tumor necrosis factor (ligand) superfamily, member 4 [Source:HGNC Symbol;Acc:11934]                          | 1.731949897  | 3.209752712  | 11.98017727 | 0.000537695 | 0.006425616 | 2.207636582  | 2.492318033  | 2.911817771  | 4.061832926  | 3.524590078  |
| ENSG00000237206 | IMPDH1P4    | IMP (inosine monophosphate) dehydrogenase 1 pseudogene 4 [Source:HGNC Symbol;Acc:33959]                      | 1.734259537  | 1.31727943   | 11.98134235 | 0.000537359 | 0.006425616 | 0.566455146  | 0.555709266  | 1.598401271  | 1.844482366  | 1.3928929    |
| ENSG00000112029 | FBXO5       | F-box protein 5 [Source:HGNC Symbol;Acc:13584]                                                               | -1.316567812 | 3.753514935  | 11.96169478 | 0.000543055 | 0.006481454 | 4.230629451  | 4.438368203  | 2.955212673  | 2.379562322  | 3.779126901  |
| ENSG00000056736 | IL17RB      | interleukin 17 receptor B [Source:HGNC Symbol;Acc:18015]                                                     | 1.992825516  | 0.021786624  | 11.9615197  | 0.000543106 | 0.006481454 | -0.698419327 | -0.464918547 | 0.778135316  | -0.874832399 | 0.303422373  |
| ENSG00000160326 | SLC2A6      | solute carrier family 2 (facilitated glucose transporter), member 6 [Source:HGNC Symbol;Acc:11011]           | 1.331431745  | 5.546489475  | 11.94626971 | 0.000547569 | 0.006530281 | 4.525609656  | 5.03708129   | 5.50599359   | 6.486768637  | 5.405885943  |
| ENSG00000205683 | DPF3        | D4, zinc and double PHD fingers, family 3 [Source:HGNC Symbol;Acc:17427]                                     | -1.606226114 | 2.07383636   | 11.94136922 | 0.000549011 | 0.006543035 | 2.744312733  | 2.778115078  | 0.570569237  | 0.669468625  | 2.041752268  |
| ENSG00000186594 | MIR22HG     | MIR22 host gene (non-protein coding) [Source:HGNC Symbol;Acc:28219]                                          | 1.933930993  | 5.961715585  | 11.92080563 | 0.000555105 | 0.006611169 | 4.70812895   | 4.550279288  | 4.899631261  | 7.38676287   | 6.012031481  |
| ENSG00000122574 | WIPF3       | WAS/WASL interacting protein family, member 3 [Source:HGNC Symbol;Acc:22004]                                 | -3.980511944 | -0.397910639 | 11.9180754  | 0.000555919 | 0.006612834 | 1.084982398  | 0.095631612  | -4.621297774 | -7.002070102 | -1.87334355  |
| ENSG00000243696 | RP5-966M1.6 | Musculoskeletal embryonic nuclear protein 1 [Source:UniProtKB/TREMBL;Acc:D6R8Y8]                             | 1.715903909  | 1.034726574  | 11.91781057 | 0.000555998 | 0.006612834 | 0.657137645  | 0.610915408  | 1.397324829  | 1.39816257   | 0.676839958  |
| ENSG00000126215 | XRCC3       | X-ray repair complementing defective repair in Chinese hamster cells 3 [Source:HGNC Symbol;Acc:12830]        | -1.262498441 | 4.032581858  | 11.91499136 | 0.00055684  | 0.006618365 | 4.679568409  | 4.705760662  | 3.100336608  | 3.135408114  | 3.636471986  |
| ENSG00000136404 | TM6SF1      | transmembrane 6 superfamily member 1 [Source:HGNC Symbol;Acc:11860]                                          | 1.670797867  | 3.790570026  | 11.91306135 | 0.000557417 | 0.006620743 | 2.32292636   | 3.247479563  | 3.551857933  | 4.547804143  | 4.270278622  |
| ENSG00000166578 | IQCD        | IQ motif containing D [Source:HGNC Symbol;Acc:25168]                                                         | 2.081082358  | -0.102344917 | 11.89657733 | 0.000562372 | 0.006675076 | -0.555769858 | -0.932821174 | -0.99931534  | 0.434658742  | 0.415212929  |
| ENSG00000111684 | LPCAT3      | lysophosphatidylcholine acyltransferase 3 [Source:HGNC Symbol;Acc:30244]                                     | -1.176835931 | 6.100752784  | 11.89296703 | 0.000563463 | 0.006683508 | 6.671554818  | 6.591256372  | 5.274756428  | 5.583046766  | 5.854025822  |
| ENSG00000179304 | FAM156B     | family with sequence similarity 156, member B [Source:HGNC Symbol;Acc:31962]                                 | 1.593392877  | 1.997641897  | 11.8913466  | 0.000563953 | 0.006684808 | 1.448792784  | 1.255368251  | 2.642776537  | 2.320413773  | 1.746389777  |
| ENSG00000143067 | ZNF697      | zinc finger protein 697 [Source:HGNC Symbol;Acc:32034]                                                       | 1.943544186  | 2.023854419  | 11.88975322 | 0.000564436 | 0.006686015 | 0.769809504  | 1.355744383  | 1.582674799  | 2.8843467    | 2.435629945  |
| ENSG00000196503 | ARL9        | ADP-ribosylation factor-like 9 [Source:HGNC Symbol;Acc:23592]                                                | -2.886746522 | 0.083785571  | 11.87925757 | 0.000567626 | 0.006719264 | 1.287817526  | 1.07079906   | -7.002070102 | -3.360122781 | -1.55968627  |
| ENSG00000166965 | RCCD1       | RCC1 domain containing 1 [Source:HGNC Symbol;Acc:30457]                                                      | -1.343174841 | 3.815047178  | 11.86218588 | 0.000572853 | 0.006769537 | 4.346439116  | 4.379972967  | 3.149202463  | 2.387817579  | 3.889710441  |
| ENSG00000112773 | FAM46A      | family with sequence similarity 46, member A [Source:HGNC Symbol;Acc:18345]                                  | 1.218474678  | 5.450132064  | 11.86117917 | 0.000573162 | 0.006769537 | 4.792235539  | 4.578250478  | 5.589020897  | 6.137350316  | 5.590864997  |
| ENSG00000178814 | OPLAH       | 5-oxoprolinase (ATP-hydrolysing) [Source:HGNC Symbol;Acc:8149]                                               | 1.524476604  | 2.713921967  | 11.86035831 | 0.000573415 | 0.006769537 | 1.546924617  | 2.107040151  | 2.942946747  | 3.211794066  | 3.063446788  |
| ENSG00000232114 | ACO18693.5  |                                                                                                              | 2.232854806  | -0.10034792  | 11.86132824 | 0.000573117 | 0.006769537 | -0.555769858 | -1.507080648 | -0.215316613 | 0.556835562  | 0.04992943   |
| ENSG00000106211 | HSPB1       | heat shock 27kDa protein 1 [Source:HGNC Symbol;Acc:5246]                                                     | -1.288681678 | 4.299382072  | 11.84970491 | 0.000576705 | 0.006797625 | 4.951516125  | 4.920372416  | 3.895241519  | 2.918936894  | 3.857086264  |
| ENSG00000134072 | CAMK1       | calcium/calmodulin-dependent protein kinase I [Source:HGNC Symbol;Acc:1459]                                  | 1.407163891  | 4.688099202  | 11.84889432 | 0.000576956 | 0.006797625 | 3.520070133  | 4.296139761  | 4.700907097  | 5.517782818  | 4.681448344  |

|                 |               |                                                                                                   |              |              |             |             |             |              |              |              |              |              |
|-----------------|---------------|---------------------------------------------------------------------------------------------------|--------------|--------------|-------------|-------------|-------------|--------------|--------------|--------------|--------------|--------------|
| ENSG00000186806 | VSIG10L       | V-set and immunoglobulin domain containing 10 like [Source:HGNC Symbol;Acc:27111]                 | 1.894418149  | 0.381858866  | 11.85132072 | 0.000576205 | 0.006797625 | -0.094677427 | -0.355038393 | 0.210162819  | 0.74852395   | 0.763888603  |
| ENSG00000102524 | TNFSF13B      | tumor necrosis factor (ligand) superfamily, member 13b [Source:HGNC Symbol;Acc:11929]             | 1.412710303  | 6.171633483  | 11.84326343 | 0.000578703 | 0.006813638 | 4.753366735  | 5.579745494  | 5.984184815  | 6.853787473  | 6.733283275  |
| ENSG00000141084 | RANBP10       | RAN binding protein 10 [Source:HGNC Symbol;Acc:29285]                                             | -1.146479281 | 6.052231423  | 11.83750781 | 0.000580495 | 0.00683015  | 6.403366644  | 6.718063829  | 5.720587303  | 5.114688341  | 5.760102512  |
| ENSG00000226174 | TEX22         | testis expressed 22 [Source:HGNC Symbol;Acc:40026]                                                | 1.80926327   | 0.254566236  | 11.83091557 | 0.000582553 | 0.006845198 | 0.000762307  | 0.016063025  | 0.250534523  | 0.369457657  | 0.264147325  |
| ENSG00000235257 | AC093415.2    |                                                                                                   | 2.069437874  | 0.16296489   | 11.83104546 | 0.000582513 | 0.006845198 | -0.250832646 | -0.464918547 | -0.82139248  | 0.962608982  | 0.303422373  |
| ENSG00000170909 | OSCAR         | osteoclast associated, immunoglobulin-like receptor [Source:HGNC Symbol;Acc:29960]                | 1.180007713  | 5.952270051  | 11.82429081 | 0.00058463  | 0.006865    | 4.715181607  | 5.210183925  | 5.839498562  | 6.348220457  | 6.745812048  |
| ENSG00000207652 | MIR621        | microRNA 621 [Source:HGNC Symbol;Acc:32877]                                                       | -1.817519905 | 1.432625039  | 11.80651167 | 0.000590239 | 0.006926236 | 2.332130562  | 2.126114598  | 0.168628767  | -0.244792505 | 0.872340852  |
| ENSG00000206077 | ZDHHC11B      | zinc finger, DHHC-type containing 11B [Source:HGNC Symbol;Acc:32962]                              | 1.85300141   | 0.482472205  | 11.77238754 | 0.000601158 | 0.007049654 | -0.094677427 | 0.095631612  | 1.098750223  | -0.009775356 | 0.676839958  |
| ENSG00000111331 | OAS3          | 2'-5'-oligoadenylate synthetase 3, 100kDa [Source:HGNC Symbol;Acc:8088]                           | 1.253900634  | 6.491345239  | 11.76690136 | 0.000602933 | 0.007065743 | 5.356348278  | 6.050077988  | 6.606022427  | 7.157931605  | 6.674113089  |
| ENSG00000226507 | IPMKP1        | inositol polyphosphate multikinase pseudogene 1 [Source:HGNC Symbol;Acc:39354]                    | 2.125628099  | 0.059175346  | 11.75782483 | 0.00060588  | 0.007095545 | -1.350769713 | -0.713501401 | -0.453950945 | 0.369457657  | 0.948644093  |
| ENSG00000254528 | RP11-728F11.4 |                                                                                                   | 1.843586189  | 0.511891806  | 11.75192174 | 0.000607804 | 0.007113339 | -0.14487434  | 0.095631612  | 0.778135316  | 1.36509501   | -0.80787826  |
| ENSG0000049323  | LTBP1         | latent transforming growth factor beta binding protein 1 [Source:HGNC Symbol;Acc:6714]            | -1.590763295 | 5.253919156  | 11.74665032 | 0.000609528 | 0.007124015 | 5.471196963  | 6.197124414  | 3.315422674  | 4.968236968  | 4.97544198   |
| ENSG00000197415 | VEPH1         | ventricular zone expressed PH domain-containing 1 [Source:HGNC Symbol;Acc:25735]                  | 1.786487494  | 1.130739875  | 11.74722144 | 0.000609341 | 0.007124015 | 0.597320328  | 0.277241192  | 1.32354911   | 1.719236363  | 1.11240278   |
| ENSG00000152939 | MARVELD2      | MARVEL domain containing 2 [Source:HGNC Symbol;Acc:26401]                                         | -1.914281996 | 0.934899839  | 11.74497256 | 0.000610078 | 0.007124476 | 1.920891399  | 1.976501425  | -1.202308962 | -2.0191864   | -0.257803757 |
| ENSG00000115112 | TFCP2L1       | transcription factor CP2-like 1 [Source:HGNC Symbol;Acc:17925]                                    | 1.70954623   | 0.87485362   | 11.74405323 | 0.00061038  | 0.007124476 | 0.254194054  | 0.836121102  | 1.467510679  | 1.224680533  | -0.316136847 |
| ENSG00000128266 | GNAZ          | guanine nucleotide binding protein (G protein), alpha 2 polypeptide [Source:HGNC Symbol;Acc:4395] | 1.780492024  | 3.923264577  | 11.74015497 | 0.000611659 | 0.00713467  | 2.455179325  | 3.327938933  | 3.403098856  | 4.990090995  | 4.143448621  |
| ENSG00000097046 | CDC7          | cell division cycle 7 [Source:HGNC Symbol;Acc:1745]                                               | -1.208826748 | 4.49291546   | 11.7207674  | 0.000618065 | 0.007204598 | 4.975210034  | 5.141540505  | 3.948363866  | 3.090594325  | 4.431855191  |
| ENSG00000111319 | SCNN1A        | sodium channel, non-voltage-gated 1 alpha subunit [Source:HGNC Symbol;Acc:10599]                  | 1.900367242  | 0.142747355  | 11.70394413 | 0.000623678 | 0.007265203 | -0.625332215 | 0.016063025  | 0.805492218  | -0.406691783 | 0.139468177  |
| ENSG00000166002 | SMCO4         | single-pass membrane protein with coiled-coil domains 4 [Source:HGNC Symbol;Acc:24810]            | 1.577684283  | 4.056883454  | 11.69427691 | 0.000626926 | 0.007298204 | 2.863368893  | 3.352442362  | 3.701339772  | 4.903497265  | 4.492587718  |
| ENSG00000007038 | PRSS21        | protease, serine, 21 (testisin) [Source:HGNC Symbol;Acc:9485]                                     | -1.70208642  | 2.131996255  | 11.69118488 | 0.000627969 | 0.007302837 | 3.124027351  | 2.652185163  | 1.163613388  | -0.146146183 | 1.802296017  |
| ENSG00000266853 | ITM2BP1       | integral membrane protein 2B pseudogene 1 [Source:HGNC Symbol;Acc:20919]                          | 1.630634375  | 1.62689803   | 11.69062989 | 0.000628156 | 0.007302837 | 1.210071084  | 0.904001603  | 2.150470541  | 1.914722448  | 1.481174441  |
| ENSG00000230450 | NEK2P4        | NEK2 pseudogene 4 [Source:HGNC Symbol;Acc:37818]                                                  | -2.436821221 | -0.066932869 | 11.6839185  | 0.000630426 | 0.007324376 | 0.848890306  | 0.715367718  | -3.766908349 | -2.97427061  | -0.257803757 |
| ENSG00000164344 | KLKB1         | kallikrein B, plasma (Fletcher factor) 1 [Source:HGNC Symbol;Acc:6371]                            | 1.828989092  | -0.068405991 | 11.67274847 | 0.000634222 | 0.007363608 | -0.250832646 | -0.204475541 | 0.365283811  | 0.03296005   | -1.083770229 |
| ENSG00000199133 | MIRLET7D      | microRNA let-7d [Source:HGNC Symbol;Acc:31481]                                                    | 1.886068669  | -0.107937043 | 11.66375473 | 0.000637296 | 0.007394401 | -0.625332215 | -1.289265519 | 0.328039018  | 0.798919003  | -1.70800759  |
| ENSG00000104626 | ERI1          | exoribonuclease 1 [Source:HGNC Symbol;Acc:23994]                                                  | -1.134788756 | 4.692461114  | 11.65561696 | 0.00064009  | 0.007421912 | 5.148029922  | 5.328128009  | 4.177648248  | 3.683523464  | 4.486201609  |
| ENSG00000197329 | PELI1         | pellino E3 ubiquitin protein ligase 1 [Source:HGNC Symbol;Acc:8827]                               | 1.66165435   | 6.179403435  | 11.64341709 | 0.000644301 | 0.007463239 | 5.237695108  | 5.205707923  | 5.64119881   | 7.341260267  | 6.235985773  |
| ENSG00000196787 | HIST1H2AG     | histone cluster 1, H2ag [Source:HGNC Symbol;Acc:4737]                                             | 1.696020579  | 2.443350659  | 11.64283163 | 0.000644504 | 0.007463239 | 1.752861822  | 1.464652754  | 2.36792042   | 3.314964122  | 2.504656975  |
| ENSG00000152042 | NBPF11        | neuroblastoma breakpoint family, member 11 [Source:HGNC Symbol;Acc:31993]                         | 1.822362399  | 0.370475473  | 11.64128223 | 0.000645041 | 0.007464535 | -0.196880952 | 0.277241192  | 0.28980717   | 0.823471408  | 0.139468177  |
| ENSG00000114019 | AMOTL2        | angiominin like 2 [Source:HGNC Symbol;Acc:17812]                                                  | -3.172307694 | -0.34379676  | 11.62435769 | 0.000650937 | 0.007527801 | 0.796654307  | 0.764888368  | -3.766908349 | -7.002070102 | -3.221241555 |
| ENSG00000171729 | TMEM51        | transmembrane protein 51 [Source:HGNC Symbol;Acc:25488]                                           | 1.805322502  | 0.281110424  | 11.62222596 | 0.000651684 | 0.007531472 | -0.094677427 | -0.112176905 | 0.505333341  | 0.301169826  | 0.378903451  |
| ENSG00000205269 | TMEM170B      | transmembrane protein 170B [Source:HGNC Symbol;Acc:34244]                                         | 1.601314774  | 6.449190567  | 11.59646545 | 0.000660773 | 0.007631492 | 4.933486777  | 5.941205894  | 6.16535218   | 7.465655792  | 6.585778961  |
| ENSG00000105835 | NAMPT         | nicotinamide phosphoribosyltransferase [Source:HGNC Symbol;Acc:30092]                             | 2.515950866  | 7.208195278  | 11.59226451 | 0.000662267 | 0.007643722 | 5.266786509  | 5.557084059  | 5.264935772  | 8.649049925  | 7.738613381  |

|                 |                |                                                                                                |              |             |             |             |             |              |              |              |              |              |
|-----------------|----------------|------------------------------------------------------------------------------------------------|--------------|-------------|-------------|-------------|-------------|--------------|--------------|--------------|--------------|--------------|
| ENSG00000238197 | PAXBP1-AS1     | PAXBP1 antisense RNA 1 [Source:HGNC Symbol;Acc:39603]                                          | 1.549324953  | 2.112555648 | 11.58041456 | 0.000666501 | 0.007687531 | 1.361587606  | 1.551875699  | 2.5886897    | 2.475638093  | 2.098677261  |
| ENSG00000129277 | CCL4           | chemokine (C-C motif) ligand 4 [Source:HGNC Symbol;Acc:10630]                                  | -1.626244165 | 4.336704384 | 11.57264235 | 0.000669292 | 0.007708758 | 5.519334152  | 4.180008374  | 3.061151464  | 3.382617132  | 4.170253557  |
| ENSG00000149798 | CDC42EP2       | CDC42 effector protein (Rho GTPase binding) 2 [Source:HGNC Symbol;Acc:16263]                   | 1.881581138  | 2.812697793 | 11.57162548 | 0.000669659 | 0.007708758 | 1.608823392  | 1.809558268  | 2.1289755    | 3.883584355  | 3.194574245  |
| ENSG00000232928 | DDX3YP1        | DEAD (Asp-Glu-Ala-Asp) box polypeptide 3, Y-linked pseudogene 1 [Source:HGNC Symbol;Acc:42171] | 1.934011716  | 4.168275543 | 11.57235834 | 0.000669395 | 0.007708758 | 2.824764954  | 2.825562359  | 3.089249033  | 5.198030214  | 4.918082231  |
| ENSG00000224086 | L22NC03-86G7.1 |                                                                                                | 1.92695116   | 1.071673456 | 11.56789614 | 0.000671003 | 0.007719172 | -0.046168491 | 0.207316148  | 0.538319988  | 1.770646721  | 1.702990823  |
| ENSG00000124098 | FAM210B        | family with sequence similarity 210, member B [Source:HGNC Symbol;Acc:16102]                   | -1.114344535 | 6.170682623 | 11.5601911  | 0.000673789 | 0.00774615  | 6.424497523  | 6.854056826  | 5.706144324  | 5.482564629  | 5.939871642  |
| ENSG00000198019 | FCGR1B         | Fc fragment of IgG, high affinity lb, receptor (CD64) [Source:HGNC Symbol;Acc:3614]            | 1.979107621  | 2.302972455 | 11.55879943 | 0.000674294 | 0.007746877 | 0.502670228  | 1.128690501  | 1.360908506  | 2.890169632  | 3.439004866  |
| ENSG00000232801 | SDCBPP3        | syndecan binding protein (syntenin) pseudogene 3 [Source:HGNC Symbol;Acc:44687]                | 1.282706747  | 5.865995958 | 11.55260112 | 0.000676545 | 0.007763791 | 4.736135045  | 5.434287602  | 5.782128645  | 6.362951298  | 6.394430056  |
| ENSG00000130489 | SCO2           | SCO2 cytochrome c oxidase assembly protein [Source:HGNC Symbol;Acc:10604]                      | 1.610339708  | 5.517662388 | 11.55231234 | 0.00067665  | 0.007763791 | 4.230629451  | 4.525351572  | 4.92479781   | 6.679398028  | 5.757453315  |
| ENSG00000214787 | MS4A4E         | membrane-spanning 4-domains, subfamily A, member 4E [Source:HGNC Symbol;Acc:14284]             | 1.901045978  | 2.186255549 | 11.54909413 | 0.000677823 | 0.007772161 | 0.686141241  | 1.785765038  | 2.107155349  | 2.974805722  | 2.390748373  |
| ENSG00000101213 | PTK6           | protein tyrosine kinase 6 [Source:HGNC Symbol;Acc:9617]                                        | 1.995743978  | 0.663764256 | 11.54179977 | 0.000680487 | 0.007797621 | -0.489407866 | 0.438524285  | 0.602113338  | 1.55300499   | 0.139468177  |
| ENSG00000258315 | C17orf49       | chromosome 17 open reading frame 49 [Source:HGNC Symbol;Acc:28737]                             | 1.706492834  | 1.594839253 | 11.54015879 | 0.000681088 | 0.007799415 | 1.040754067  | 0.740340508  | 1.855590689  | 2.436381066  | 1.044483142  |
| ENSG00000237683 | AL627309.1     | Uncharacterized protein [Source:UniProtKB/TrEMBL;Acc:R4GN28]                                   | 1.799843419  | 5.975345659 | 11.52662717 | 0.000686064 | 0.007851271 | 4.70458965   | 4.30453643   | 4.932573168  | 7.115066374  | 6.633755157  |
| ENSG00000158062 | UBXN11         | UBX domain protein 11 [Source:HGNC Symbol;Acc:30600]                                           | 1.384231936  | 7.260149725 | 11.51564559 | 0.000690129 | 0.007892643 | 5.923440551  | 6.808290873  | 7.453535717  | 8.137536399  | 7.092980759  |
| ENSG00000140287 | HDC            | histidine decarboxylase [Source:HGNC Symbol;Acc:4855]                                          | -1.813550725 | 2.906424359 | 11.51293005 | 0.000691138 | 0.007899036 | 4.230629451  | 3.100920657  | 2.150470541  | 0.497040107  | 2.006486965  |
| ENSG00000142512 | SIGLEC10       | sialic acid binding Ig-like lectin 10 [Source:HGNC Symbol;Acc:15620]                           | 1.322972786  | 6.372407    | 11.51014156 | 0.000692175 | 0.007905747 | 5.26918452   | 5.774413599  | 6.283758522  | 7.359738805  | 6.294416672  |
| ENSG00000233387 | RP11-342D11.3  |                                                                                                | 1.940259546  | 0.416776591 | 11.50833083 | 0.00069285  | 0.007908307 | -0.14487434  | 0.016063025  | 1.566775005  | -0.296766077 | -0.440394449 |
| ENSG00000185222 | WBP5           | WW domain binding protein 5 [Source:HGNC Symbol;Acc:30084]                                     | -1.752846537 | 1.821212806 | 11.50462968 | 0.000694231 | 0.00791892  | 2.614540713  | 2.393450112  | -0.329705368 | 0.402426505  | 1.958084208  |
| ENSG00000129450 | SIGLEC9        | sialic acid binding Ig-like lectin 9 [Source:HGNC Symbol;Acc:10878]                            | 1.324726802  | 5.433301422 | 11.48871448 | 0.0007002   | 0.007981831 | 4.183097611  | 4.681789027  | 5.136180506  | 6.005421395  | 6.181031271  |
| ENSG00000247570 | SDCBPP2        | syndecan binding protein (syntenin) pseudogene 2 [Source:HGNC Symbol;Acc:44686]                | 1.25629111   | 4.916636888 | 11.47723298 | 0.000704539 | 0.008026081 | 3.918660435  | 4.401659971  | 4.8396951    | 5.490252556  | 5.354221754  |
| ENSG00000164821 | DEFA4          | defensin, alpha 4, corticostatin [Source:HGNC Symbol;Acc:2763]                                 | -2.609575363 | 1.702475625 | 11.47333478 | 0.000706019 | 0.008037717 | 2.937609558  | 1.03087254   | -7.002070102 | -0.525689211 | 2.496207062  |
| ENSG00000091651 | ORC6           | origin recognition complex, subunit 6 [Source:HGNC Symbol;Acc:17151]                           | -1.707235967 | 3.699755299 | 11.47107624 | 0.000706877 | 0.008042276 | 4.580707812  | 4.30453643   | 1.534439871  | 3.03386134   | 3.305127547  |
| ENSG0000014914  | MTMR11         | myotubularin related protein 11 [Source:HGNC Symbol;Acc:24307]                                 | 1.373425765  | 5.098287944 | 11.46926108 | 0.000707568 | 0.008044921 | 4.001759993  | 4.61753212   | 5.025659538  | 6.034631298  | 5.012946482  |
| ENSG00000263391 | ALS12428.1     |                                                                                                | 1.738515853  | 1.973847425 | 11.46801195 | 0.000708044 | 0.008045119 | 0.874315765  | 1.253368251  | 1.881530361  | 3.216436525  | 1.090116303  |
| ENSG00000248099 | INSL3          | insulin-like 3 (Leydig cell) [Source:HGNC Symbol;Acc:6086]                                     | 1.877447634  | 0.617205833 | 11.45987832 | 0.00071115  | 0.008075181 | -0.775407551 | 0.016063025  | 0.632982468  | 0.74852395   | 1.374569317  |
| ENSG00000255240 | RP11-142C4.6   |                                                                                                | 2.076247234  | 0.803570413 | 11.45413836 | 0.00071335  | 0.008094927 | 0.365960855  | -0.408932621 | 0.250534523  | 1.55300499   | 1.198257616  |
| ENSG00000248905 | FMN1           | formin 1 [Source:HGNC Symbol;Acc:3768]                                                         | 1.726596872  | 3.06796527  | 11.43593383 | 0.000720373 | 0.008169342 | 1.711139862  | 2.244306154  | 2.612118495  | 4.05666439   | 3.443406881  |
| ENSG00000213928 | IRF9           | interferon regulatory factor 9 [Source:HGNC Symbol;Acc:6131]                                   | 1.347652503  | 3.238033839 | 11.42603065 | 0.000724222 | 0.008202403 | 2.560743753  | 2.69113155   | 3.622778389  | 3.854096116  | 2.956635145  |
| ENSG00000101493 | ZNF516         | zinc finger protein 516 [Source:HGNC Symbol;Acc:28990]                                         | 1.348424935  | 5.85516196  | 11.42674758 | 0.000723943 | 0.008202403 | 4.782196375  | 5.033297242  | 5.504950982  | 6.739900509  | 6.259268388  |
| ENSG00000172889 | EGFL7          | EGF-like-domain, multiple 7 [Source:HGNC Symbol;Acc:20594]                                     | -1.816037552 | 3.466528511 | 11.4207323  | 0.000726291 | 0.008220524 | 4.267078814  | 3.909778597  | 0.805492218  | 2.565713262  | 3.704069251  |
| ENSG00000183763 | TRAIIP         | TRAF interacting protein [Source:HGNC Symbol;Acc:30764]                                        | -1.480752333 | 2.395519179 | 11.41916233 | 0.000726905 | 0.008222172 | 3.053437594  | 3.247479563  | 1.304500245  | 0.74852395   | 2.018338105  |
| ENSG00000113749 | HRH2           | histamine receptor H2 [Source:HGNC Symbol;Acc:5183]                                            | 1.523853295  | 4.686695723 | 11.4177613  | 0.000727453 | 0.008223076 | 3.250774959  | 4.16394696   | 4.326707234  | 5.492168154  | 5.168612187  |
| ENSG00000116120 | FARSB          | phenylalanyl-tRNA synthetase, beta subunit [Source:HGNC Symbol;Acc:17800]                      | -1.183484347 | 4.31126439  | 11.40439004 | 0.000732708 | 0.008277143 | 4.944031259  | 4.920372416  | 3.803243143  | 3.178871708  | 3.896147672  |



|                 |               |                                                                                                                        |              |              |             |             |             |              |             |              |              |              |
|-----------------|---------------|------------------------------------------------------------------------------------------------------------------------|--------------|--------------|-------------|-------------|-------------|--------------|-------------|--------------|--------------|--------------|
| ENSG00000170458 | CD14          | CD14 molecule [Source:HGNC Symbol;Acc:1628]                                                                            | 1.787302131  | 8.486211114  | 11.3877916  | 0.000739284 | 0.008346061 | 6.469506905  | 7.482074742 | 7.984612549  | 9.354563373  | 9.270023302  |
| ENSG00000165283 | STOML2        | stomatolysin (EP872)-like 2 [Source:HGNC Symbol;Acc:14559]                                                             | -1.107483811 | 5.586969909  | 11.38407497 | 0.000740764 | 0.008357402 | 6.203470965  | 5.967221872 | 5.183866841  | 4.80213659   | 5.305482859  |
| ENSG00000046653 | GPM6B         | glycoprotein M6B [Source:HGNC Symbol;Acc:4461]                                                                         | -3.11636756  | 0.134724916  | 11.37744648 | 0.000743412 | 0.008381892 | 1.084982398  | 0.925936776 | -7.002070102 | -3.888428289 | 0.139468177  |
| ENSG00000175538 | KCNE3         | potassium voltage-gated channel, Isk-related family, member 3 [Source:HGNC Symbol;Acc:6243]                            | 1.279464186  | 5.95926261   | 11.37448975 | 0.000744597 | 0.008389856 | 4.68316955   | 5.235654878 | 5.686046143  | 6.534023815  | 6.690871289  |
| ENSG00000123989 | CHPF          | chondroitin polymerizing factor [Source:HGNC Symbol;Acc:24291]                                                         | -1.546143698 | 3.366052632  | 11.3724966  | 0.000745396 | 0.008392379 | 4.362249789  | 3.651289677 | 2.766259878  | 1.596392694  | 3.057715783  |
| ENSG00000173597 | SULT1B1       | sulfotransferase family, cytosolic, 1B, member 1 [Source:HGNC Symbol;Acc:17845]                                        | 1.356267369  | 5.388861944  | 11.37154851 | 0.000745777 | 0.008392379 | 3.701474281  | 4.884416301 | 5.389928924  | 5.642901371  | 6.225161062  |
| ENSG00000164649 | CDC47L        | cell division cycle associated 7-like [Source:HGNC Symbol;Acc:30777]                                                   | -1.212128068 | 5.132799245  | 11.36961557 | 0.000746553 | 0.008395735 | 5.564941291  | 5.379702666 | 4.497880644  | 3.490045265  | 5.710743664  |
| ENSG00000142089 | IFITM3        | interferon induced transmembrane protein 3 [Source:HGNC Symbol;Acc:5414]                                               | 1.737596547  | 5.321421595  | 11.36788342 | 0.00074725  | 0.008398189 | 3.740019116  | 3.821846517 | 4.011394951  | 6.057451373  | 6.483154982  |
| ENSG00000272345 | RP1-30M3.5    | chromosome 2 open reading frame 27A [Source:HGNC Symbol;Acc:25077]                                                     | 1.871457217  | 0.892400204  | 11.36472272 | 0.000748523 | 0.00840711  | -0.555769858 | 0.610915408 | 1.379231566  | 1.206127397  | 0.923655414  |
| ENSG00000197927 | C2orf27A      | chromosome 2 open reading frame 27A [Source:HGNC Symbol;Acc:25077]                                                     | 1.762209629  | 0.47321989   | 11.35887535 | 0.000750883 | 0.008428227 | -0.196880952 | 0.310972527 | 0.884581662  | 0.466186565  | 0.415212929  |
| ENSG00000253422 | CTB-47B8.4    | shroom family member 1 [Source:HGNC Symbol;Acc:24084]                                                                  | -1.906763698 | 0.630979232  | 11.35215118 | 0.000753606 | 0.008453392 | 1.806678074  | 1.434365866 | -1.438615935 | -1.231517591 | -1.18885156  |
| ENSG00000164403 | SHROOM1       | shroom family member 1 [Source:HGNC Symbol;Acc:24084]                                                                  | 1.765394261  | 2.97917084   | 11.34885347 | 0.000754946 | 0.008463008 | 1.668175302  | 2.813846027 | 3.186096972  | 4.268193945  | -0.9858258   |
| ENSG00000107282 | APBA1         | amyloid beta (A4) precursor protein-binding, family A, member 1 [Source:HGNC Symbol;Acc:578]                           | 1.860914503  | 0.357617944  | 11.33920526 | 0.000758878 | 0.008501661 | -0.698419327 | 0.133828548 | 0.632982468  | 0.527247606  | 0.518960621  |
| ENSG00000267283 | AC005306.3    | testis expressed 2 [Source:HGNC Symbol;Acc:30884]                                                                      | 1.39570587   | 2.847099778  | 11.33518589 | 0.000760522 | 0.008514648 | 2.42108026   | 2.287305009 | 3.575887544  | 2.924622147  | 2.578558393  |
| ENSG00000136478 | TEX2          | testis expressed 2 [Source:HGNC Symbol;Acc:30884]                                                                      | -1.069733789 | 5.503599121  | 11.33199239 | 0.000761831 | 0.008523867 | 5.842018808  | 6.054440781 | 4.780611023  | 4.877351856  | 5.518650873  |
| ENSG00000168734 | PKIG          | protein kinase (cAMP-dependent, catalytic) inhibitor gamma [Source:HGNC Symbol;Acc:9019]                               | -1.436442562 | 4.149982524  | 11.32674852 | 0.000763986 | 0.008542526 | 5.082729028  | 4.409466019 | 2.886421762  | 3.336448462  | 3.986396982  |
| ENSG00000115183 | TANC1         | tetratricopeptide repeat, ankyrin repeat and coiled-coil containing 1 [Source:HGNC Symbol;Acc:29364]                   | -1.784137939 | 1.177498458  | 11.32163221 | 0.000766093 | 0.008560643 | 2.060341768  | 1.912023327 | -0.740035668 | -1.042179808 | 0.997359302  |
| ENSG00000120889 | TNFRSF10B     | tumor necrosis factor receptor superfamily, member 10b [Source:HGNC Symbol;Acc:11905]                                  | 1.230009473  | 6.733139045  | 11.32025923 | 0.00076666  | 0.008561525 | 5.706144815  | 6.293075228 | 6.82401577   | 7.464192677  | 6.796157949  |
| ENSG00000070785 | EIF2B3        | eukaryotic translation initiation factor 2B, subunit 3 gamma, 58kDa [Source:HGNC Symbol;Acc:3259]                      | -1.243565572 | 3.99099676   | 11.31734658 | 0.000767864 | 0.008569514 | 4.716939397  | 4.537869269 | 3.324906709  | 3.044343756  | 3.512071509  |
| ENSG00000139631 | CSAD          | cysteine sulfonic acid decarboxylase [Source:HGNC Symbol;Acc:18966]                                                    | 1.092106368  | 4.972789428  | 11.30618818 | 0.000772492 | 0.00861569  | 4.373437975  | 4.576518077 | 5.461542069  | 5.269019574  | 4.884482612  |
| ENSG00000135604 | STX11         | syntaxin 11 [Source:HGNC Symbol;Acc:11429]                                                                             | 1.602514599  | 6.435083782  | 11.30263858 | 0.00077397  | 0.008626697 | 5.129672167  | 5.808022229 | 6.00203063   | 7.533963088  | 6.52165395   |
| ENSG00000137965 | IFI44         | interferon-induced protein 44 [Source:HGNC Symbol;Acc:16938]                                                           | 1.297246477  | 5.172724419  | 11.29834862 | 0.000775761 | 0.008641166 | 4.203302211  | 4.472303462 | 5.011045961  | 5.715208396  | 5.773276013  |
| ENSG00000259493 | RP11-621H8.2  | transmembrane protein 106C [Source:HGNC Symbol;Acc:28775]                                                              | -1.443601785 | 2.706122003  | 11.28870431 | 0.000779801 | 0.008680662 | 3.317173381  | 3.50595424  | 1.360908506  | 1.493047208  | 2.487707366  |
| ENSG00000134291 | TMEM106C      | transmembrane protein 106C [Source:HGNC Symbol;Acc:28775]                                                              | -1.25563484  | 4.813239431  | 11.28238268 | 0.000782461 | 0.008704751 | 5.389790814  | 5.282100858 | 4.4767647    | 3.49387447   | 4.696278898  |
| ENSG00000184368 | MAP7D2        | MAP7 domain containing 2 [Source:HGNC Symbol;Acc:25899]                                                                | -1.973383031 | 1.558980496  | 11.25840725 | 0.000792632 | 0.00881232  | 2.737401394  | 2.48494876  | 0.505333341  | -3.360122781 | -0.649489103 |
| ENSG00000186818 | LILRB4        | leukocyte immunoglobulin-like receptor, subfamily B (with TM and ITIM domains), member 4 [Source:HGNC Symbol;Acc:6608] | 1.548286453  | 5.409810205  | 11.25643692 | 0.000793474 | 0.008816096 | 4.074859969  | 4.61584628  | 4.77196939   | 6.217693964  | 6.112197499  |
| ENSG00000186074 | CD300LF       | CD300 molecule-like family member f [Source:HGNC Symbol;Acc:29883]                                                     | 1.482945578  | 6.126232557  | 11.24401481 | 0.000798802 | 0.008869681 | 4.797229045  | 5.488725746 | 5.746402261  | 7.057366875  | 6.48208562   |
| ENSG00000250384 | UBE2CP3       | ubiquitin-conjugating enzyme E2C pseudogene 3 [Source:HGNC Symbol;Acc:43552]                                           | -2.610539397 | -0.159810486 | 11.23461196 | 0.000802859 | 0.008897846 | 0.742455703  | 0.527293245 | -3.766908349 | -3.888428289 | -0.095747566 |
| ENSG00000183207 | RUVBL2        | RuvB-like AAA ATPase 2 [Source:HGNC Symbol;Acc:10475]                                                                  | -1.085986696 | 5.258851502  | 11.23643789 | 0.000802069 | 0.008897846 | 5.833942089  | 5.758457548 | 4.581362878  | 4.532993113  | 5.039358506  |
| ENSG00000102032 | RENBP         | renin binding protein [Source:HGNC Symbol;Acc:9959]                                                                    | 1.308974626  | 4.357805493  | 11.23507317 | 0.000802659 | 0.008897846 | 3.458362025  | 3.873554127 | 4.336117616  | 5.130762949  | 4.416264004  |
| ENSG00000247763 | RP11-447H19.1 | renin binding protein [Source:HGNC Symbol;Acc:9959]                                                                    | 1.674322924  | 2.093789811  | 11.23293266 | 0.000803586 | 0.008900282 | 1.148882041  | 1.202433699 | 1.907011864  | 2.643615717  | 2.71589062   |
| ENSG00000256751 | RP11-695J4.2  | renin binding protein [Source:HGNC Symbol;Acc:9959]                                                                    | 1.840877526  | 0.867768995  | 11.22096223 | 0.000808785 | 0.008952225 | -0.196880952 | 0.583576386 | 0.570569237  | 1.206127397  | 1.428856327  |

|                 |               |                                                                                                                        |              |             |             |             |             |              |             |              |              |              |
|-----------------|---------------|------------------------------------------------------------------------------------------------------------------------|--------------|-------------|-------------|-------------|-------------|--------------|-------------|--------------|--------------|--------------|
| ENSG00000182481 | KPNA2         | karyopherin alpha 2 (RAG cohort 1, importin alpha 1) [Source:HGNC Symbol;Acc:6395]                                     | -1.557242551 | 4.492731132 | 11.21841065 | 0.000809898 | 0.008958894 | 5.311680775  | 4.994900652 | 2.604351095  | 3.886500298  | 4.306975745  |
| ENSG00000137474 | MYO7A         | myosin VIIA [Source:HGNC Symbol;Acc:7606]                                                                              | 1.727327348  | 2.667701928 | 11.19265714 | 0.000821217 | 0.009078374 | 1.040754067  | 2.08771013  | 2.386155201  | 3.314964122  | 3.324348684  |
| ENSG00000158186 | MRAS          | muscle RAS oncogene homolog [Source:HGNC Symbol;Acc:7227]                                                              | 1.728710043  | 3.090611889 | 11.18605378 | 0.000824144 | 0.009105006 | 1.431768352  | 2.652185163 | 2.892812798  | 3.918192614  | 3.430160334  |
| ENSG00000129195 | FAM64A        | family with sequence similarity 64, member A [Source:HGNC Symbol;Acc:25483]                                            | -2.548445022 | 0.500261705 | 11.18306123 | 0.000825475 | 0.009113967 | 1.229903997  | 0.904001603 | -7.002070102 | -2.670141381 | 1.279288931  |
| ENSG00000166033 | HTRA1         | HtrA serine peptidase 1 [Source:HGNC Symbol;Acc:9476]                                                                  | 1.843603336  | 1.034349731 | 11.17761143 | 0.000827903 | 0.009135031 | -0.196880952 | 0.242702272 | -0.329705368 | 0.984547783  | 2.372397358  |
| ENSG00000101307 | SIRPB1        | signal-regulatory protein beta 1 [Source:HGNC Symbol;Acc:15928]                                                        | 1.399486981  | 6.758402983 | 11.17338078 | 0.000829793 | 0.009146543 | 5.470155113  | 6.2077954   | 6.554045411  | 7.701865288  | 6.914239558  |
| ENSG00000179921 | GPBAR1        | G protein-coupled bile acid receptor 1 [Source:HGNC Symbol;Acc:19680]                                                  | 1.414674371  | 4.725886192 | 11.17294397 | 0.000829988 | 0.009146543 | 3.424338996  | 4.379972967 | 4.789201202  | 5.625553375  | 4.550866558  |
| ENSG00000261662 | RP5-104218.7  |                                                                                                                        | 2.210802973  | 2.173414056 | 11.17067251 | 0.000831005 | 0.009152003 | 0.435934254  | 1.699255595 | 1.689321579  | 3.427354029  | 1.869263524  |
| ENSG00000145428 | RNF175        | ring finger protein 175 [Source:HGNC Symbol;Acc:27735]                                                                 | 2.104939498  | -0.09065371 | 11.15924557 | 0.000836139 | 0.009202773 | -1.47369337  | 0.016063025 | 0.934997507  | -0.874832399 | -0.726511138 |
| ENSG00000171643 | S1002         | S100 calcium binding protein Z [Source:HGNC Symbol;Acc:30367]                                                          | 1.573075848  | 3.216185767 | 11.15436288 | 0.000838343 | 0.009221245 | 2.082327188  | 2.825562359 | 3.186096972  | 4.094984473  | 3.114026435  |
| ENSG00000178035 | IMPDH2        | IMP (inosine 5'-monophosphate) dehydrogenase 2 [Source:HGNC Symbol;Acc:6053]                                           | -1.14942917  | 6.512641266 | 11.13722288 | 0.000846125 | 0.009295317 | 7.026881118  | 6.95151089  | 6.182408321  | 5.670231437  | 6.295025729  |
| ENSG00000197312 | DDI2          | DNA-damage inducible 1 homolog 2 (S. cerevisiae) [Source:HGNC Symbol;Acc:24578]                                        | -1.075480733 | 6.275328191 | 11.13719822 | 0.000846136 | 0.009295317 | 6.675175993  | 6.876406641 | 5.847746149  | 5.520601021  | 5.995639036  |
| ENSG00000119969 | HELLS         | helicase, lymphoid-specific [Source:HGNC Symbol;Acc:4861]                                                              | -1.28780421  | 3.391903617 | 11.13078257 | 0.000849068 | 0.00932169  | 3.948891281  | 4.028581215 | 2.456873398  | 2.045707388  | 3.434589378  |
| ENSG00000147119 | CHST7         | carbohydrate (N-acetylglucosamine 6-O) sulfotransferase 7 [Source:HGNC Symbol;Acc:13817]                               | 1.412347171  | 2.795648774 | 11.12851876 | 0.000850105 | 0.00932724  | 2.015339542  | 2.295753104 | 3.055465682  | 3.221064093  | 2.974995322  |
| ENSG00000187796 | CARD9         | caspase recruitment domain family, member 9 [Source:HGNC Symbol;Acc:16391]                                             | 1.521822155  | 5.422564406 | 11.12477644 | 0.000851821 | 0.009340241 | 4.118070306  | 4.779898163 | 5.072860299  | 6.452252305  | 5.58788573   |
| ENSG00000151458 | ANKRD50       | ankyrin repeat domain 50 [Source:HGNC Symbol;Acc:29223]                                                                | 1.440811516  | 4.43211813  | 11.12144861 | 0.000853351 | 0.009351173 | 3.274841002  | 3.807148173 | 4.13245547   | 5.056326182  | 5.052385377  |
| ENSG00000133069 | TMCC2         | transmembrane and coiled-coil domain family 2 [Source:HGNC Symbol;Acc:24239]                                           | -1.479191602 | 4.067808692 | 11.11930154 | 0.00085434  | 0.009356164 | 4.047181178  | 5.176270433 | 2.627528952  | 3.130496995  | 3.989410538  |
| ENSG00000158473 | CD1D          | CD1d molecule [Source:HGNC Symbol;Acc:1637]                                                                            | 1.30371588   | 6.011383722 | 11.10772456 | 0.000859689 | 0.009403016 | 4.749936823  | 5.419867954 | 5.876246965  | 6.890199169  | 6.232174554  |
| ENSG00000111052 | LIN7A         | lin-7 homolog A (C. elegans) [Source:HGNC Symbol;Acc:17787]                                                            | 1.699236096  | 4.17532201  | 11.10878829 | 0.000859196 | 0.009403016 | 2.824764954  | 3.120075649 | 3.362231416  | 5.02755662   | 4.972399074  |
| ENSG00000143184 | XL1           | chemokine (C motif) ligand 1 [Source:HGNC Symbol;Acc:10645]                                                            | -1.978055671 | 2.015162898 | 11.10258579 | 0.000862074 | 0.009423235 | 3.567603998  | 2.068117593 | 1.120696904  | -0.350682213 | -0.095747566 |
| ENSG00000095917 | TPSD1         | tryptase delta 1 [Source:HGNC Symbol;Acc:14118]                                                                        | -2.564653212 | 0.495456168 | 11.10141296 | 0.00086262  | 0.009423329 | 2.276003363  | 0.207316148 | -2.539967122 | -1.854339469 | -1.55968627  |
| ENSG00000258645 | HSPE1P2       | heat shock 10kDa protein 1 pseudogene 2 [Source:HGNC Symbol;Acc:20052]                                                 | -1.284526969 | 3.792839009 | 11.0962695  | 0.000865015 | 0.009443624 | 4.616932295  | 4.33149293  | 3.049757403  | 2.436381066  | 3.412306925  |
| ENSG00000135643 | KCNMB4        | potassium large conductance calcium-activated channel, subfamily M, beta member 4 [Source:HGNC Symbol;Acc:6289]        | 1.617526963  | 1.459635246 | 11.09476057 | 0.00086572  | 0.009445437 | 0.686141241  | 0.98980953  | 1.659646938  | 1.596392694  | 1.895203721  |
| ENSG00000104972 | LILRB1        | leukocyte immunoglobulin-like receptor, subfamily B (with TM and ITIM domains), member 1 [Source:HGNC Symbol;Acc:6605] | 1.295154699  | 6.745337261 | 11.09294758 | 0.000866566 | 0.009448803 | 5.665761812  | 6.036909884 | 6.52348126   | 7.578594849  | 7.093681056  |
| ENSG00000197249 | SERPINA1      | serpin peptidase inhibitor, clade A (alpha-1 antitrypsin, antitrypsin), member 1 [Source:HGNC Symbol;Acc:8941]         | 1.871550032  | 9.270281566 | 11.08997192 | 0.000867958 | 0.009458102 | 7.268066693  | 8.251497483 | 8.978124508  | 10.32993031  | 9.708886256  |
| ENSG00000111445 | RFCS          | replication factor C (activator 1) 5, 36.5kDa [Source:HGNC Symbol;Acc:9973]                                            | -1.143973595 | 4.353136733 | 11.0866593  | 0.00086951  | 0.009469135 | 4.868548297  | 4.84466512  | 3.70497617   | 3.20713662   | 4.438485891  |
| ENSG00000248592 | MEM110-MUSTN1 | TMEM110-MUSTN1 readthrough [Source:HGNC Symbol;Acc:38834]                                                              | 1.620333486  | 1.2244895   | 11.08326285 | 0.000871104 | 0.009480613 | 0.686141241  | 0.98980953  | 1.718398126  | 1.610570062  | 0.551948963  |
| ENSG00000116514 | RNF19B        | ring finger protein 19B [Source:HGNC Symbol;Acc:26886]                                                                 | 1.361731418  | 5.959513536 | 11.07592373 | 0.000874558 | 0.009512313 | 5.020038328  | 5.362715152 | 5.734887125  | 6.865657723  | 6.074381435  |
| ENSG00000151503 | NCAPD3        | non-SMC condensin II complex, subunit D3 [Source:HGNC Symbol;Acc:28952]                                                | -1.109647464 | 5.805107392 | 11.07402493 | 0.000875454 | 0.009516163 | 6.167929236  | 6.4360694   | 5.489220774  | 4.753453877  | 5.611549358  |
| ENSG00000164181 | ELOVL7        | ELOVL fatty acid elongase 7 [Source:HGNC Symbol;Acc:26292]                                                             | 1.69812092   | 3.07550266  | 11.0717893  | 0.000876511 | 0.009521747 | 1.711139862  | 2.784132029 | 3.055465682  | 4.064410267  | 2.730373058  |

|                 |               |                                                                                                                 |              |             |             |             |             |              |              |              |              |              |
|-----------------|---------------|-----------------------------------------------------------------------------------------------------------------|--------------|-------------|-------------|-------------|-------------|--------------|--------------|--------------|--------------|--------------|
| ENSG0000010292  | NCAPD2        | non-SMC condensin I complex, subunit D2 [Source:HGNC Symbol;Acc:24305]                                          | -1.087445571 | 6.396979076 | 11.06928973 | 0.000877693 | 0.009528695 | 6.767543695  | 6.926908018  | 5.962322384  | 5.571315722  | 6.331700246  |
| ENSG00000269271 | CTB-83J4.2    |                                                                                                                 | 2.196766273  | 1.737825063 | 11.06464538 | 0.000879894 | 0.009546689 | -0.14487434  | 1.306429105  | 1.360908506  | 2.704366551  | 1.97033799   |
| ENSG00000243708 | PLA2G4B       | phospholipase A2, group IVB (cytosolic) [Source:HGNC Symbol;Acc:9036]                                           | 1.735336571  | 0.466105312 | 11.05650982 | 0.000883763 | 0.009582747 | 0.292419846  | 0.171040209  | 1.030832979  | 0.527247606  | -0.316136847 |
| ENSG00000163386 | NBPFF10       | neuroblastoma breakpoint family, member 10 [Source:HGNC Symbol;Acc:31992]                                       | 1.340524582  | 6.391283951 | 11.05342354 | 0.000885236 | 0.009592787 | 5.252314135  | 5.872272214  | 6.249930415  | 7.325499553  | 6.429801145  |
| ENSG00000149948 | HMG2A         | high mobility group AT-hook 2 [Source:HGNC Symbol;Acc:5009]                                                     | -1.949314952 | 0.904324314 | 11.05074448 | 0.000886516 | 0.009594813 | 1.696960037  | 1.900991143  | -2.845623393 | -1.336401299 | 0.615745481  |
| ENSG00000123342 | MMP19         | matrix metalloproteinase 19 [Source:HGNC Symbol;Acc:7165]                                                       | 1.927138649  | 0.143457004 | 11.0509001  | 0.000886442 | 0.009594813 | -0.942926472 | -0.464918547 | -0.66302287  | 0.335717742  | 1.090116303  |
| ENSG00000144959 | NCEH1         | neutral cholesterol ester hydrolase 1 [Source:HGNC Symbol;Acc:29260]                                            | -1.168508737 | 4.936281678 | 11.04882299 | 0.000887435 | 0.009598845 | 5.208004997  | 5.666176731  | 3.907918014  | 4.250195492  | 4.954005614  |
| ENSG00000180596 | HIST1H2BC     | histone cluster 1, H2bc [Source:HGNC Symbol;Acc:4757]                                                           | 2.347859433  | 0.744311765 | 11.04570103 | 0.000888931 | 0.009609102 | 0.254194054  | -1.191564836 | 0.210162819  | 1.732261721  | 0.997359302  |
| ENSG00000183723 | CMTM4         | CKLF-like MARVEL transmembrane domain containing 4 [Source:HGNC Symbol;Acc:19175]                               | 1.489809226  | 3.538259775 | 11.04257035 | 0.000890433 | 0.009619419 | 2.446729819  | 3.03180153   | 3.447189363  | 4.352857805  | 3.681886894  |
| ENSG00000140749 | IGSF6         | immunoglobulin superfamily, member 6 [Source:HGNC Symbol;Acc:5953]                                              | 1.358861754  | 5.604767633 | 11.0398012  | 0.000891764 | 0.009627873 | 4.141819186  | 5.038340436  | 5.388798938  | 6.154385947  | 6.311373824  |
| ENSG00000171262 | FAM98B        | family with sequence similarity 98, member 8 [Source:HGNC Symbol;Acc:26773]                                     | -1.162915081 | 4.510488931 | 11.03839253 | 0.000892442 | 0.009629269 | 4.876434106  | 5.067001583  | 3.876015453  | 3.080443796  | 4.789130606  |
| ENSG00000170866 | LILRA3        | leukocyte immunoglobulin-like receptor, subfamily A (without TM domain), member 3 [Source:HGNC Symbol;Acc:6604] | 1.159637605  | 5.783740691 | 11.03398291 | 0.000894567 | 0.009646272 | 4.763607814  | 5.460824645  | 6.103327111  | 6.37234231   | 5.710743664  |
| ENSG00000091262 | ABCC6         | ATP-binding cassette, sub-family C (CFTR/MRP), member 6 [Source:HGNC Symbol;Acc:57]                             | 1.765976354  | 2.38742371  | 11.03188537 | 0.00089558  | 0.009651265 | 1.361587606  | 1.773719635  | 1.980862385  | 3.439318024  | 2.3444256    |
| ENSG00000258546 | RP11-713N11.3 |                                                                                                                 | -1.925871988 | 0.693660222 | 11.02954127 | 0.000896713 | 0.009657548 | 1.752861822  | 1.494316873  | -2.073364206 | -1.042179808 | -0.201737898 |
| ENSG00000113494 | PRLR          | prolactin receptor [Source:HGNC Symbol;Acc:9446]                                                                | 2.476969388  | 1.672027921 | 11.02084412 | 0.00090093  | 0.009697016 | -0.250832646 | 0.968831255  | -0.010608983 | 3.065082826  | 1.788521245  |
| ENSG00000140932 | CMTM2         | CKLF-like MARVEL transmembrane domain containing 2 [Source:HGNC Symbol;Acc:19173]                               | 2.01232673   | 1.377038458 | 11.01511515 | 0.000903719 | 0.009721072 | -0.250832646 | 0.947543428  | 1.415193986  | 2.320413773  | 1.177268129  |
| ENSG00000211904 | IGHJ2         | immunoglobulin heavy joining 2 [Source:HGNC Symbol;Acc:5534]                                                    | -1.844281609 | 1.810956252 | 11.01053232 | 0.000905956 | 0.009735449 | 2.973344712  | 1.955327308  | -1.097244829 | 1.770646721  | 0.706443614  |
| ENSG00000230373 | GOLGA6L5P     | golgin A6 family-like 5, pseudogene [Source:HGNC Symbol;Acc:30472]                                              | 1.915585007  | 0.067172929 | 11.01010559 | 0.000906165 | 0.009735449 | -0.306880589 | -0.932821174 | -0.10933503  | 0.402426505  | 0.485200289  |
| ENSG00000270878 | CTD-2302E22.5 |                                                                                                                 | -1.67352629  | 1.751195636 | 11.00524845 | 0.000908543 | 0.009750106 | 2.730456787  | 2.361613919  | 0.6928072    | -0.46496394  | 1.279288931  |
| ENSG00000111452 | GPR133        | G protein-coupled receptor 133 [Source:HGNC Symbol;Acc:19893]                                                   | 1.439988364  | 2.840481269 | 11.00504977 | 0.00090864  | 0.009750106 | 1.79341104   | 2.492318033  | 3.170400428  | 3.579252501  | 2.453198788  |
| ENSG00000103381 | CPPED1        | calcineurin-like phosphoesterase domain containing 1 [Source:HGNC Symbol;Acc:25632]                             | 1.392126724  | 7.013560362 | 10.99969504 | 0.000911269 | 0.009772342 | 5.660290985  | 6.314020098  | 6.782026379  | 7.994518863  | 7.234006661  |
| ENSG00000105352 | CEACAM4       | carcinoembryonic antigen-related cell adhesion molecule 4 [Source:HGNC Symbol;Acc:1816]                         | 1.545137215  | 4.412210158 | 10.9880443  | 0.000917015 | 0.009827963 | 3.042264405  | 3.419690528  | 3.66819303   | 5.143007294  | 5.293341295  |
| ENSG00000180509 | KCNE1         | potassium voltage-gated channel, Isk-related family, member 1 [Source:HGNC Symbol;Acc:6240]                     | 1.882991385  | 2.302816129 | 10.98424826 | 0.000918895 | 0.009842105 | 1.37945544   | 1.255368251  | 1.613958159  | 3.239427344  | 2.786891356  |
| ENSG00000267190 | AC002314.4    |                                                                                                                 | -2.308960593 | 0.021373604 | 10.9793672  | 0.000921319 | 0.009862044 | 0.899300886  | 0.859104642  | -4.621297774 | -2.419096061 | -0.201737898 |
| ENSG00000205077 | SAMD4A        | sterile alpha motif domain containing 4A [Source:HGNC Symbol;Acc:23023]                                         | 1.49690189   | 2.608275495 | 10.97572532 | 0.000923131 | 0.009875422 | 1.945089405  | 1.878670417  | 2.752269159  | 3.419322554  | 2.390748373  |
| ENSG00000204394 | VARS          | valyl-tRNA synthetase [Source:HGNC Symbol;Acc:12651]                                                            | -1.092214125 | 6.489549719 | 10.96280131 | 0.000929592 | 0.009932431 | 7.025108654  | 6.976686723  | 6.085303912  | 5.794968159  | 6.116338743  |
| ENSG00000119922 | IFIT2         | interferon-induced protein with tetratricopeptide repeats 2 [Source:HGNC Symbol;Acc:5409]                       | 1.326258894  | 4.449622877 | 10.96342714 | 0.000929278 | 0.009932431 | 3.55586655   | 3.396312155  | 4.077409057  | 4.887575893  | 5.330652314  |
| ENSG00000183527 | PSMG1         | proteasome (prosome, macropain) assembly chaperone 1 [Source:HGNC Symbol;Acc:3043]                              | -1.188839572 | 4.425551239 | 10.95910279 | 0.000931449 | 0.009946222 | 5.149332295  | 4.899738006  | 3.626618026  | 3.683523464  | 4.054164368  |
| ENSG00000103184 | SEC14L5       | SEC14-like 5 (S. cerevisiae) [Source:HGNC Symbol;Acc:29032]                                                     | 2.391813413  | 1.700438113 | 10.95321336 | 0.000934414 | 0.009965761 | -0.698419327 | 1.418980604  | 1.225685365  | 3.023302203  | 1.11240278   |
| ENSG00000237892 | KLF7-IT1      | KLF7 intronic transcript 1 (non-protein coding) [Source:HGNC Symbol;Acc:41355]                                  | 2.757629651  | 0.462717819 | 10.9540269  | 0.000934004 | 0.009965761 | -0.306880589 | -1.191564836 | -0.99931534  | 1.914722448  | 0.095393329  |
| ENSG00000187997 | C17orf99      | chromosome 17 open reading frame 99 [Source:HGNC Symbol;Acc:34490]                                              | -2.057387787 | 0.826485302 | 10.93484205 | 0.000943725 | 0.010058954 | 1.448792784  | 2.116608898  | -1.721358966 | -2.97427061  | 0.04992943   |

|                 |               |                                                                                                                                                |              |             |             |             |             |              |              |              |              |              |
|-----------------|---------------|------------------------------------------------------------------------------------------------------------------------------------------------|--------------|-------------|-------------|-------------|-------------|--------------|--------------|--------------|--------------|--------------|
| ENSG00000126458 | RRAS          | related RAS viral (F-ras) oncogene homolog [Source:HGNC Symbol;Acc:10447]                                                                      | 1.260952799  | 4.083713339 | 10.92894635 | 0.000946733 | 0.010084892 | 3.118718315  | 3.621355247  | 4.268918289  | 4.640538067  | 4.270278622  |
| ENSG00000132535 | DLG4          | discs, large homolog 4 (Drosophila) [Source:HGNC Symbol;Acc:2903]                                                                              | 1.344618175  | 4.803298708 | 10.92008387 | 0.000951273 | 0.010114838 | 3.672780374  | 4.37599461   | 4.618470392  | 5.519662232  | 5.144482599  |
| ENSG00000124104 | SNX21         | sorting nexin family member 21 [Source:HGNC Symbol;Acc:16154]                                                                                  | 1.674537121  | 3.01801849  | 10.92020255 | 0.000951212 | 0.010114838 | 1.79341104   | 2.226741239  | 2.548775847  | 3.889410359  | 3.512071509  |
| ENSG00000262180 | OCLM          | oculomedin [Source:HGNC Symbol;Acc:8103]                                                                                                       | 1.831056214  | 0.464240248 | 10.9216005  | 0.000950495 | 0.010114838 | -0.306880589 | 0.133828548  | 0.805492218  | 1.12943269   | -0.376928291 |
| ENSG00000204315 | FKBPL         | FK506 binding protein like [Source:HGNC Symbol;Acc:13949]                                                                                      | -1.608095356 | 2.14105388  | 10.90834389 | 0.000957321 | 0.010172981 | 3.02534068   | 2.865836059  | 0.328039018  | 1.048430793  | 1.580441325  |
| ENSG00000252759 | Y_RNA         | Y RNA [Source:RFAM;Acc:RF00019]                                                                                                                | 1.74784377   | 0.897458356 | 10.90407225 | 0.000959531 | 0.010190299 | 0.254194054  | 0.016063025  | 0.778135316  | 2.056104393  | -0.095747566 |
| ENSG0000023280  | CRYBG3        | Beta/gamma crystallin domain-containing protein 3; cDNA FU60082, weakly similar to Uro-adherence factor A [Source:UniProtKB/TrEMBL;Acc:B4DLE8] | 1.50016771   | 2.685394288 | 10.89272869 | 0.000965425 | 0.010246696 | 1.46561866   | 2.353543875  | 2.918097532  | 3.059925941  | 3.02284327   |
| ENSG00000197459 | HIST1H2BH     | histone cluster 1, H2bh [Source:HGNC Symbol;Acc:4755]                                                                                          | 1.842491473  | 0.195369543 | 10.88185293 | 0.00097111  | 0.010300812 | -0.306880589 | -0.355038393 | 0.250534523  | 0.894716898  | -0.316136847 |
| ENSG00000159335 | PTM5          | parathyromosin [Source:HGNC Symbol;Acc:9629]                                                                                                   | -1.319060254 | 3.595953351 | 10.87844489 | 0.000972899 | 0.010313552 | 4.104705577  | 4.251237133  | 2.37706662   | 2.848906753  | 3.524590078  |
| ENSG00000120756 | PLS1          | plastin 1 [Source:HGNC Symbol;Acc:9090]                                                                                                        | -1.64244404  | 2.049445746 | 10.87129685 | 0.000976661 | 0.010347186 | 2.778381342  | 2.916017525  | 1.120696904  | -0.406691783 | 1.612068369  |
| ENSG00000166831 | RBPMS2        | RNA binding protein with multiple splicing 2 [Source:HGNC Symbol;Acc:19098]                                                                    | -1.678261226 | 1.600668659 | 10.85873264 | 0.00098331  | 0.01041134  | 2.438230535  | 2.632310473  | -0.99931534  | 0.114810932  | 0.706443614  |
| ENSG00000161996 | WDR90         | WD repeat domain 90 [Source:HGNC Symbol;Acc:26960]                                                                                             | -1.092571921 | 4.673913608 | 10.85645204 | 0.000984521 | 0.010417886 | 5.163581333  | 5.183117208  | 3.996635421  | 3.871861288  | 4.618607854  |
| ENSG00000164402 | Sep-08        | septin 8 [Source:HGNC Symbol;Acc:16511]                                                                                                        | -1.151726426 | 4.646295662 | 10.85426262 | 0.000985686 | 0.010423927 | 5.283489476  | 5.364724096  | 4.340799889  | 3.579252501  | 3.647960442  |
| ENSG00000233527 | AC092295.7    |                                                                                                                                                | 1.641393933  | 1.145150819 | 10.84396497 | 0.000991183 | 0.010475745 | 0.435934254  | 0.859104642  | 1.517996407  | 1.43048915   | 1.044483142  |
| ENSG00000153904 | DDAH1         | dimethylarginine dimethylaminohydrolase 1 [Source:HGNC Symbol;Acc:2715]                                                                        | -2.80635955  | 0.07471912  | 10.83478545 | 0.000996109 | 0.010521472 | 1.37945544   | 0.836121102  | -3.766908349 | -4.730697034 | -1.083770229 |
| ENSG00000155380 | SLC16A1       | solute carrier family 16 (monocarboxylate transporter), member 1 [Source:HGNC Symbol;Acc:10922]                                                | -1.209816316 | 4.205879147 | 10.82299323 | 0.001002473 | 0.010575969 | 4.686761725  | 4.746390666  | 3.611197783  | 2.697741416  | 4.37076624   |
| ENSG00000182272 | B4GALNT4      | beta-1,4-N-acetyl-galactosaminyl transferase 4 [Source:HGNC Symbol;Acc:26315]                                                                  | 1.850898613  | 0.149464621 | 10.82347048 | 0.001002215 | 0.010575969 | -0.046168491 | -0.713501401 | 0.570569237  | 0.434658742  | -0.201737898 |
| ENSG00000135077 | HAVCR2        | hepatitis A virus cellular receptor 2 [Source:HGNC Symbol;Acc:18437]                                                                           | 1.326029577  | 4.858546794 | 10.81669044 | 0.001005891 | 0.01060566  | 3.995980462  | 4.073491918  | 4.526933176  | 5.486413713  | 5.463369879  |
| ENSG00000232229 | LINC00865     | long intergenic non-protein coding RNA 865 [Source:HGNC Symbol;Acc:45170]                                                                      | 1.783506882  | 0.941369488 | 10.8082026  | 0.001010514 | 0.010647999 | 0.000762307  | -0.523165112 | 0.832340008  | 0.229488395  | 2.247064062  |
| ENSG00000069869 | NEDD4         | neural precursor cell expressed, developmentally down-regulated 4, E3 ubiquitin protein ligase [Source:HGNC Symbol;Acc:7727]                   | -1.215184929 | 3.909590892 | 10.80690003 | 0.001011225 | 0.010649102 | 4.44729995   | 4.4852879    | 3.232187228  | 2.768996501  | 3.850471957  |
| ENSG00000105711 | SCN1B         | sodium channel, voltage-gated, type I, beta subunit [Source:HGNC Symbol;Acc:10586]                                                             | 1.896652801  | 1.833414597 | 10.80091596 | 0.001014499 | 0.010677175 | 0.686141241  | 1.109650305  | 1.304500245  | 2.842914522  | 2.041752268  |
| ENSG00000237886 | RP11-611D20.2 |                                                                                                                                                | 1.981931485  | 0.22348403  | 10.79828404 | 0.001015942 | 0.010685959 | -0.365194284 | -1.394066322 | 0.210162819  | 0.402426505  | 0.973207307  |
| ENSG00000108272 | DHRS11        | dehydrogenase/reductase (SDR family) member 11 [Source:HGNC Symbol;Acc:28639]                                                                  | -1.347694049 | 2.838231888 | 10.78869614 | 0.001021218 | 0.010735018 | 3.520070133  | 3.621355247  | 2.004662384  | 1.665926088  | 2.164148811  |
| ENSG00000137124 | ALDH1B1       | aldehyde dehydrogenase 1 family, member B1 [Source:HGNC Symbol;Acc:407]                                                                        | -1.322282673 | 3.508291512 | 10.77833759 | 0.001026949 | 0.0107888   | 4.225699209  | 4.031113272  | 2.949092746  | 2.203686226  | 3.204982016  |
| ENSG00000100003 | SEC14L2       | SEC14-like 2 (S. cerevisiae) [Source:HGNC Symbol;Acc:10699]                                                                                    | -1.659371903 | 2.55745106  | 10.77506002 | 0.001028769 | 0.010801457 | 3.420029142  | 3.494990685  | 2.016416749  | -0.099242291 | 1.11240278   |
| ENSG00000149636 | DSN1          | DSN1, MIS12 kinetochore complex component [Source:HGNC Symbol;Acc:16165]                                                                       | -1.178609711 | 4.212537693 | 10.77282299 | 0.001030013 | 0.010801599 | 4.802205327  | 4.702587364  | 3.599523466  | 2.985724478  | 4.204371626  |
| ENSG00000131042 | LILRB2        | leukocyte immunoglobulin-like receptor, subfamily B (with TM and ITIM domains), member 2 [Source:HGNC Symbol;Acc:6606]                         | 1.543979777  | 7.823739621 | 10.77373447 | 0.001029506 | 0.010801599 | 6.031212219  | 7.021943625  | 7.62432399   | 8.741130988  | 8.28514159   |
| ENSG00000213397 | HAUS7         | HAUS augmin-like complex, subunit 7 [Source:HGNC Symbol;Acc:32979]                                                                             | 1.673473257  | 0.578941977 | 10.76619963 | 0.001033705 | 0.01083385  | 0.174562846  | 0.583576386  | 0.721814282  | 0.773941511  | 0.264147325  |
| ENSG00000215784 | FAM72D        | family with sequence similarity 72, member D [Source:HGNC Symbol;Acc:33593]                                                                    | -1.749421966 | 1.501037318 | 10.75397482 | 0.001040556 | 0.01089914  | 2.446729819  | 2.244306154  | -1.202308962 | -0.053815412 | 1.177268129  |
| ENSG00000203760 | CENPW         | centromere protein W [Source:HGNC Symbol;Acc:21488]                                                                                            | -1.696417548 | 2.651478706 | 10.75273127 | 0.001041255 | 0.010899963 | 3.449931193  | 3.286151722  | 0.328039018  | 1.679439471  | 2.578558393  |
| ENSG00000175155 | YPEL2         | yippe-like 2 (Drosophila) [Source:HGNC Symbol;Acc:18326]                                                                                       | 1.07294899   | 6.000356277 | 10.75043139 | 0.00104255  | 0.010907013 | 5.10168997   | 5.60290773   | 6.237429934  | 6.480027647  | 6.173101579  |
| ENSG00000112339 | HBS1L         | HBS1-like (S. cerevisiae) [Source:HGNC Symbol;Acc:4834]                                                                                        | -1.092807004 | 5.517285558 | 10.7346802  | 0.001051462 | 0.010980613 | 6.139376066  | 5.892604324  | 4.878855169  | 4.94044551   | 5.273699717  |

|                 |               |                                                                                                    |              |              |             |             |             |              |              |              |              |              |
|-----------------|---------------|----------------------------------------------------------------------------------------------------|--------------|--------------|-------------|-------------|-------------|--------------|--------------|--------------|--------------|--------------|
| ENSG00000136689 | IL1RN         | Interleukin 1 receptor antagonist [Source:HGNC Symbol;Acc:6000]                                    | 1.419283082  | 5.286900606  | 10.73508049 | 0.001051234 | 0.010980613 | 4.03877292   | 4.688220509  | 4.869164352  | 6.049667943  | 5.839068896  |
| ENSG00000146054 | TRIM7         | tripartite motif containing 7 [Source:HGNC Symbol;Acc:16278]                                       | 1.65737074   | 2.427539459  | 10.73533659 | 0.001051089 | 0.010980613 | 1.018120824  | 1.711936244  | 2.096120255  | 3.007317163  | 3.173530708  |
| ENSG00000183066 | WBP2NL        | WBP2 N-terminal like [Source:HGNC Symbol;Acc:28389]                                                | 1.721788053  | 0.353005245  | 10.72801896 | 0.001055254 | 0.011013661 | 0.046214424  | 0.056395802  | 0.9100098    | 0.265774258  | -0.045536284 |
| ENSG00000163823 | CCR1          | chemokine (C-C motif) receptor 1 [Source:HGNC Symbol;Acc:1602]                                     | 1.455412193  | 6.273292966  | 10.7226205  | 0.001058337 | 0.011033042 | 4.276645101  | 5.249855047  | 5.557186035  | 6.759516999  | 7.43996047   |
| ENSG00000120708 | TGFBI         | transforming growth factor, beta-induced, 68kDa [Source:HGNC Symbol;Acc:11771]                     | 1.483615092  | 8.28432839   | 10.72256668 | 0.001058368 | 0.011033042 | 6.614703752  | 7.500464188  | 8.217246795  | 9.071306245  | 8.794252217  |
| ENSG00000162873 | KLHDC8A       | kelch domain containing 8A [Source:HGNC Symbol;Acc:25573]                                          | -3.053577844 | -0.058731146 | 10.71493316 | 0.001062743 | 0.011058953 | 0.995126841  | 0.764888368  | -7.002070102 | -3.888428289 | -0.440394449 |
| ENSG00000115414 | FN1           | fibronectin 1 [Source:HGNC Symbol;Acc:3778]                                                        | -1.976650548 | 1.24160452   | 10.7158935  | 0.001062192 | 0.011058953 | 2.512979527  | 1.94462256   | -3.233942493 | -0.350682213 | 0.095393329  |
| ENSG00000169247 | SH3TC2        | SH3 domain and tetratricopeptide repeats 2 [Source:HGNC Symbol;Acc:29427]                          | -1.514835893 | 2.565684227  | 10.71564466 | 0.001062334 | 0.011058953 | 3.250774959  | 3.538353702  | 0.884581662  | 1.719236363  | 1.580441325  |
| ENSG00000238975 | snoU13        | Small nucleolar RNA U13 [Source:RFAM;Acc:RF01210]                                                  | 1.702392337  | 0.665338211  | 10.71174677 | 0.001064575 | 0.011068143 | -0.046168491 | -0.068151468 | 0.9100098    | 1.523337554  | -0.045536284 |
| ENSG00000114923 | SLC4A3        | solute carrier family 4 (anion exchanger), member 3 [Source:HGNC Symbol;Acc:11029]                 | 1.765975619  | 1.247343401  | 10.71120395 | 0.001064887 | 0.011068143 | -0.094677427 | 0.836121102  | 1.053829154  | 1.39816257   | 2.064792492  |
| ENSG00000251429 | RP11-597D13.7 |                                                                                                    | 2.017657096  | 0.535514838  | 10.70868342 | 0.001066339 | 0.011076673 | -0.306880589 | 0.016063025  | 0.081791624  | 1.538247531  | 0.223773082  |
| ENSG00000125089 | SH3TC1        | SH3 domain and tetratricopeptide repeats 1 [Source:HGNC Symbol;Acc:26009]                          | 1.17576481   | 6.286964897  | 10.70319286 | 0.001069508 | 0.011103024 | 5.323266482  | 5.82563175   | 6.292244141  | 6.991180562  | 6.456180224  |
| ENSG00000161981 | SNRNP25       | small nuclear ribonucleoprotein 25kDa (U11/U12) [Source:HGNC Symbol;Acc:14161]                     | -1.220174868 | 4.251546877  | 10.69942679 | 0.001071687 | 0.011112505 | 4.898287778  | 4.713663503  | 3.149202463  | 3.696873774  | 4.091104988  |
| ENSG00000234719 | RP11-166B2.1  | Putative NPIP-like protein LOC729978 [Source:UniProtKB/Swiss-Prot;Acc:A6NJ64]                      | 1.834975226  | 0.209731215  | 10.70046892 | 0.001071084 | 0.011112505 | 0.000762307  | -0.355038393 | -0.10933503  | 0.556835562  | 0.415212929  |
| ENSG00000181982 | CCDC149       | coiled-coil domain containing 149 [Source:HGNC Symbol;Acc:25405]                                   | 1.59932427   | 3.923866516  | 10.6909553  | 0.001076606 | 0.011156917 | 2.237334199  | 3.340242669  | 3.579853854  | 4.726042594  | 4.481928444  |
| ENSG00000123685 | BATF3         | basic leucine zipper transcription factor, ATF-like 3 [Source:HGNC Symbol;Acc:28915]               | 1.553209517  | 1.903153812  | 10.67814675 | 0.001084086 | 0.011227807 | 1.084982398  | 1.387708937  | 2.263288494  | 2.460063232  | 1.760570749  |
| ENSG00000163625 | WDFY3         | WD repeat and FYVE domain containing 3 [Source:HGNC Symbol;Acc:20751]                              | 1.459252401  | 5.733176228  | 10.67568928 | 0.001085527 | 0.011236104 | 4.175447334  | 4.994900652  | 5.190367014  | 6.614928733  | 6.343524541  |
| ENSG00000182351 | CRIP1P4       | cysteine-rich protein 1 (intestinal) pseudogene 4 [Source:HGNC Symbol;Acc:44519]                   | 1.041748439  | 5.830580998  | 10.66970658 | 0.001089044 | 0.011252599 | 5.277546306  | 5.458945245  | 6.102638058  | 6.37078138   | 5.644422022  |
| ENSG00000229124 | VIM-AS1       | VIM antisense RNA 1 [Source:HGNC Symbol;Acc:44879]                                                 | 1.175118804  | 4.400818272  | 10.66990488 | 0.001088927 | 0.011252599 | 3.936874852  | 3.907024163  | 4.677037216  | 4.950233534  | 4.21213175   |
| ENSG00000167850 | CD300C        | CD300c molecule [Source:HGNC Symbol;Acc:19320]                                                     | 1.30558431   | 4.849871622  | 10.66988295 | 0.00108894  | 0.011252599 | 3.814150459  | 4.543200925  | 4.943388747  | 5.790304926  | 4.349814582  |
| ENSG00000225119 | LINC00999     | long intergenic non-protein coding RNA 999 [Source:HGNC Symbol;Acc:38537]                          | 1.746356002  | 0.133473369  | 10.66805165 | 0.001090019 | 0.011256046 | -0.094677427 | -0.157588231 | 0.28980717   | 0.466186565  | -0.376928291 |
| ENSG00000178789 | CD300LB       | CD300 molecule-like family member b [Source:HGNC Symbol;Acc:30811]                                 | 1.48060749   | 5.625944714  | 10.66480155 | 0.001091936 | 0.011269213 | 4.041581121  | 4.912154033  | 5.096586211  | 6.452744229  | 6.290146058  |
| ENSG00000107551 | RASSF4        | Ras association (RalGDS/AF-6) domain family member 4 [Source:HGNC Symbol;Acc:20793]                | 1.392071265  | 7.244213442  | 10.65633557 | 0.001096945 | 0.01131426  | 6.030505619  | 6.612968907  | 7.050627766  | 8.239413288  | 7.319408458  |
| ENSG00000070081 | NUCB2         | nucleobindin 2 [Source:HGNC Symbol;Acc:8044]                                                       | -1.296039389 | 6.461040691  | 10.65457658 | 0.001097989 | 0.011318375 | 6.854751     | 7.010761799  | 6.21847375   | 4.944648512  | 6.495925879  |
| ENSG00000169116 | PARM1         | prostate androgen-regulated mucin-like protein 1 [Source:HGNC Symbol;Acc:24536]                    | -1.395648978 | 3.557213739  | 10.65121779 | 0.001099985 | 0.011330623 | 4.438804034  | 4.152364049  | 3.138485523  | 1.856429106  | 2.737560122  |
| ENSG00000137700 | SLC37A4       | solute carrier family 37 (glucose-6-phosphate transporter), member 4 [Source:HGNC Symbol;Acc:4061] | -1.319318941 | 4.931569185  | 10.65040551 | 0.001100468 | 0.011330623 | 5.499046223  | 5.622349393  | 4.709983676  | 3.399046051  | 4.398236712  |
| ENSG00000169026 | MFSD7         | major facilitator superfamily domain containing 7 [Source:HGNC Symbol;Acc:26177]                   | 1.62064323   | 3.550140033  | 10.64787976 | 0.001101972 | 0.011339456 | 2.629549878  | 2.66528446   | 3.211884232  | 4.643988414  | 3.52042928   |
| ENSG00000132694 | ARHGEF11      | Rho guanine nucleotide exchange factor (GEF) 11 [Source:HGNC Symbol;Acc:14580]                     | 1.284026615  | 6.387132757  | 10.63436925 | 0.001110051 | 0.011409222 | 4.954499232  | 5.959931408  | 6.3971188    | 7.099129185  | 6.694569045  |
| ENSG00000248971 | KRT8P46       | keratin 8 pseudogene 46 [Source:HGNC Symbol;Acc:39880]                                             | 1.866820459  | 0.836169471  | 10.63445111 | 0.001110002 | 0.011409222 | 0.000762307  | 0.016063025  | 0.505333341  | 1.582074621  | 1.155968757  |
| ENSG00000164134 | NAA15         | N(alpha)-acetyltransferase 15, NatA auxiliary subunit [Source:HGNC Symbol;Acc:30782]               | -1.050747041 | 5.790595242  | 10.62434434 | 0.001116085 | 0.011464528 | 6.322548783  | 6.25891781   | 5.31099974   | 5.139344889  | 5.489147641  |
| ENSG00000130449 | ZSWIM6        | zinc finger, SWIM-type containing 6 [Source:HGNC Symbol;Acc:29316]                                 | 1.320060987  | 5.403093129  | 10.61678179 | 0.001120659 | 0.011504779 | 4.288514442  | 4.831651785  | 5.174717113  | 6.253709458  | 5.668124032  |

|                 |               |                                                                                                                     |              |              |             |             |             |              |              |              |              |              |
|-----------------|---------------|---------------------------------------------------------------------------------------------------------------------|--------------|--------------|-------------|-------------|-------------|--------------|--------------|--------------|--------------|--------------|
| ENSG00000185339 | TCN2          | transcobalamin II [Source:HGNC Symbol;Acc:11653]                                                                    | 1.504428169  | 3.884944158  | 10.60211234 | 0.001129585 | 0.011589638 | 3.250774959  | 3.221109942  | 3.733742023  | 4.910676573  | 3.503665038  |
| ENSG00000196411 | EPH4          | EPH receptor B4 [Source:HGNC Symbol;Acc:3395]                                                                       | -1.227596863 | 4.358535145  | 10.60087577 | 0.001130341 | 0.011590618 | 4.97374051   | 4.970043401  | 3.975715067  | 2.848906753  | 4.051283214  |
| ENSG00000090376 | IRAK3         | interleukin-1 receptor-associated kinase 3 [Source:HGNC Symbol;Acc:17020]                                           | 1.351819376  | 7.03534619   | 10.59800244 | 0.001132099 | 0.011601867 | 5.643752917  | 6.33926996   | 6.761655956  | 7.733586467  | 7.667487717  |
| ENSG00000272658 | LTBR2         | Leukotriene B4 receptor 2 [Source:UniProtKB/Swiss-Prot;Acc:Q9NPC1]                                                  | 1.902875662  | 0.399418162  | 10.59395867 | 0.001134578 | 0.011620487 | -0.555769858 | 0.095631612  | 0.328039018  | 1.296595379  | -0.257803757 |
| ENSG00000164713 | BRI3          | brain protein I3 [Source:HGNC Symbol;Acc:1109]                                                                      | 1.271290373  | 5.766619815  | 10.58906178 | 0.001137587 | 0.011644512 | 4.748218804  | 5.257443791  | 5.57418573   | 6.599906329  | 5.95767589   |
| ENSG00000259065 | RP5-1021I20.1 |                                                                                                                     | 1.748463369  | 0.070312138  | 10.58415874 | 0.001140608 | 0.011668631 | -0.046168491 | -0.252938016 | 0.832340008  | 0.074465887  | -1.55968627  |
| ENSG00000104081 | BMF           | Bcl2 modifying factor [Source:HGNC Symbol;Acc:24132]                                                                | 1.148465523  | 5.838126015  | 10.57649739 | 0.001145345 | 0.011703448 | 5.074526     | 5.240039066  | 5.79327425   | 6.467911261  | 6.135508911  |
| ENSG00000258082 | RP11-443B7.3  |                                                                                                                     | 2.381847997  | -0.349673857 | 10.57676067 | 0.001145181 | 0.011703448 | -1.132483902 | -1.394066322 | -2.287883461 | 0.58582888   | 0.139468177  |
| ENSG00000242068 | RP11-259P15.4 |                                                                                                                     | 1.160278881  | 4.642718441  | 10.57224575 | 0.001147982 | 0.011723572 | 3.966730322  | 4.235953559  | 4.652765747  | 5.02755662   | 5.017382202  |
| ENSG00000114270 | COL7A1        | collagen, type VII, alpha 1 [Source:HGNC Symbol;Acc:2214]                                                           | 2.00903297   | 1.112492688  | 10.56427872 | 0.00115294  | 0.011767363 | 0.848890306  | 0.133828548  | 0.505333341  | 2.106994346  | 0.923655414  |
| ENSG00000186704 | DTX2P1        | deltex homolog 2 pseudogene 1 [Source:HGNC Symbol;Acc:42352]                                                        | 1.613931829  | 0.889139041  | 10.55778499 | 0.001156998 | 0.011801913 | 0.435934254  | 0.789025519  | 1.225685365  | 1.314027603  | 0.095393329  |
| ENSG00000188610 | FAM72B        | family with sequence similarity 72, member B [Source:HGNC Symbol;Acc:24805]                                         | -1.632790253 | 2.086938879  | 10.55116895 | 0.001161146 | 0.011837354 | 2.811663962  | 2.684713061  | -0.390491059 | 0.61425099   | 2.381602043  |
| ENSG00000113790 | EHHADH        | enoyl-CoA hydratase/3-hydroxyacyl CoA dehydrogenase [Source:HGNC Symbol;Acc:3247]                                   | -1.495172563 | 2.368007807  | 10.53994015 | 0.001168222 | 0.011902576 | 3.206417789  | 3.026735387  | 1.517996407  | 0.369457657  | 1.994537666  |
| ENSG00000163191 | S100A11       | S100 calcium binding protein A11 [Source:HGNC Symbol;Acc:10488]                                                     | 1.302568413  | 6.940479616  | 10.52933628 | 0.001174944 | 0.01196412  | 5.605359776  | 6.386010826  | 6.930744714  | 7.691482051  | 7.255757502  |
| ENSG00000111005 | TSPAN9        | tetraspanin 9 [Source:HGNC Symbol;Acc:21640]                                                                        | 1.700454024  | 2.755164063  | 10.52449213 | 0.001178028 | 0.011988567 | 1.106598279  | 2.278807152  | 2.56487414   | 3.686872641  | 2.938038295  |
| ENSG00000079785 | DDX1          | DEAD (Asp-Glu-Ala-Asp) box helicase 1 [Source:HGNC Symbol;Acc:2734]                                                 | -1.067850109 | 6.192287567  | 10.52237224 | 0.00117938  | 0.011995373 | 6.694485599  | 6.697887453  | 5.837843371  | 5.265663847  | 5.960749975  |
| ENSG00000170006 | TMEM154       | transmembrane protein 154 [Source:HGNC Symbol;Acc:26489]                                                            | 1.128106793  | 6.624922879  | 10.51138278 | 0.001186414 | 0.012059933 | 5.7480094    | 6.169234625  | 6.753777709  | 7.251940832  | 6.743582732  |
| ENSG00000146410 | MTFR2         | mitochondrial fission regulator 2 [Source:HGNC Symbol;Acc:21115]                                                    | -1.633137218 | 1.770123553  | 10.50239991 | 0.001192196 | 0.01211169  | 2.716466474  | 2.278807152  | -0.010608983 | -0.099242291 | 1.774613685  |
| ENSG00000134243 | SORT1         | sortilin 1 [Source:HGNC Symbol;Acc:11186]                                                                           | 1.280199386  | 6.372238523  | 10.50028801 | 0.001193559 | 0.012118528 | 5.028556163  | 5.864484452  | 6.226718694  | 7.0515329    | 6.851446282  |
| ENSG00000259689 | ABCB10P1      | ATP-binding cassette, sub-family B (MDR/TAP), member 10 pseudogene 1 [Source:HGNC Symbol;Acc:14114]                 | -1.439901792 | 2.359344867  | 10.49807201 | 0.001194992 | 0.012119052 | 3.031004009  | 3.203258561  | 1.120696904  | 1.27894994   | 1.746389777  |
| ENSG00000146232 | NFKBIE        | nuclear factor of kappa light polypeptide gene enhancer in B-cells inhibitor, epsilon [Source:HGNC Symbol;Acc:7799] | 1.731373281  | 5.151562359  | 10.49849769 | 0.001194716 | 0.012119052 | 4.391160537  | 3.955816848  | 4.409269357  | 6.552500844  | 4.688882678  |
| ENSG00000268913 | ACO26806.2    |                                                                                                                     | 1.622325077  | 2.27894296   | 10.48885965 | 0.001200965 | 0.012127296 | 1.32517403   | 1.965953212  | 2.243421497  | 2.860817063  | 2.479157296  |
| ENSG00000104951 | IL4I1         | interleukin 4 induced 1 [Source:HGNC Symbol;Acc:19094]                                                              | 1.590191874  | 1.192588398  | 10.4845978  | 0.001203738 | 0.012193666 | 0.566455146  | 1.050973916  | 1.566775005  | 1.348272594  | 1.06748014   |
| ENSG00000171595 | DNAI2         | dynein, axonemal, intermediate chain 2 [Source:HGNC Symbol;Acc:18744]                                               | 1.970217397  | 0.140985211  | 10.47311462 | 0.001211243 | 0.012262617 | 0.174562846  | -0.713501401 | 1.304500245  | -0.406691783 | -1.70800759  |
| ENSG00000072134 | EPN2          | epsin 2 [Source:HGNC Symbol;Acc:18639]                                                                              | -1.276210949 | 3.47715588   | 10.46702339 | 0.001215244 | 0.012296025 | 4.021807945  | 4.314964006  | 2.905510557  | 2.240618578  | 2.807527639  |
| ENSG00000246731 | CTD-2514K5.2  |                                                                                                                     | 1.784949468  | 1.495579255  | 10.46173437 | 0.001218728 | 0.012324176 | -0.046168491 | 0.947543428  | 1.534439871  | 2.076676283  | 1.933259916  |
| ENSG00000206341 | HLA-H         | major histocompatibility complex, class I, H (pseudogene) [Source:HGNC Symbol;Acc:4965]                             | 1.600926329  | 6.104585835  | 10.45752312 | 0.00122151  | 0.012345193 | 4.782196375  | 4.734010556  | 5.016909167  | 7.036843908  | 6.977072555  |
| ENSG00000231412 | CTC-490G23.2  |                                                                                                                     | 2.110433443  | 0.677635661  | 10.45555556 | 0.001222811 | 0.012351238 | -1.034594152 | 0.555709266  | 1.076464519  | 1.79568083   | -2.832686105 |
| ENSG00000161955 | TNFSF13       | tumor necrosis factor (ligand) superfamily, member 13 [Source:HGNC Symbol;Acc:11928]                                | 1.405717844  | 4.320081784  | 10.4512524  | 0.001225663 | 0.012372926 | 3.058991905  | 3.690259922  | 3.939130343  | 5.079445529  | 4.868203525  |
| ENSG00000072952 | MRV1          | murine retrovirus integration site 1 homolog [Source:HGNC Symbol;Acc:7237]                                          | 1.834479205  | 3.600597615  | 10.4422311  | 0.001231664 | 0.012426358 | 1.32517403   | 2.995959146  | 3.094803471  | 4.436811325  | 4.299710617  |
| ENSG00000161929 | SCIMP         | SLP adaptor and CSK interacting membrane protein [Source:HGNC Symbol;Acc:33504]                                     | 1.228378558  | 6.554607275  | 10.43478854 | 0.001236637 | 0.01246303  | 5.631689742  | 5.960595701  | 6.436476474  | 7.352902946  | 6.752035869  |
| ENSG00000153208 | MERTK         | c-mer proto-oncogene tyrosine kinase [Source:HGNC Symbol;Acc:7027]                                                  | 1.462964856  | 3.946610331  | 10.43466642 | 0.001236719 | 0.01246303  | 3.013946887  | 3.376536553  | 3.754946158  | 4.94044551   | 3.82032647   |
| ENSG00000255031 | RP11-802E16.3 |                                                                                                                     | 1.335981291  | 4.376726963  | 10.43297587 | 0.001237851 | 0.012467286 | 3.424338996  | 3.845056765  | 4.198435311  | 5.231670152  | 4.494710155  |
| ENSG00000215022 | RP1-257A7.4   |                                                                                                                     | 1.804241269  | 1.078564829  | 10.43083508 | 0.001239287 | 0.012474589 | 0.401371743  | 0.789025519  | 0.75024962   | 1.926103707  | 0.791775511  |
| ENSG00000188643 | S100A16       | S100 calcium binding protein A16 [Source:HGNC Symbol;Acc:20441]                                                     | -2.977363959 | -0.369502603 | 10.4293473  | 0.001240286 | 0.012477487 | 0.742455703  | 0.812765477  | -4.621297774 | -4.730697034 | -4.610216385 |
| ENSG00000173457 | PPP1R14B      | protein phosphatase 1, regulatory (inhibitor) subunit 14B [Source:HGNC Symbol;Acc:9057]                             | -1.278020005 | 3.240885476  | 10.42260026 | 0.001244825 | 0.012515981 | 3.875243923  | 3.789310181  | 2.556847448  | 2.126858114  | 3.04038489   |

|                 |               |                                                                                                                      |              |              |             |             |             |              |              |              |              |              |
|-----------------|---------------|----------------------------------------------------------------------------------------------------------------------|--------------|--------------|-------------|-------------|-------------|--------------|--------------|--------------|--------------|--------------|
| ENSG00000105281 | SLC1A5        | solute carrier family 1 (neutral amino acid transporter), member 5 [Source:HGNC Symbol;Acc:10943]                    | -1.064751481 | 6.234806552  | 10.42060621 | 0.00124617  | 0.01252233  | 6.520218483  | 6.737574389  | 5.438791925  | 5.742824339  | 6.337033175  |
| ENSG00000257432 | RP11-244H18.4 |                                                                                                                      | -2.779364017 | -0.419919237 | 10.40523895 | 0.001256583 | 0.012612684 | 0.823008709  | 0.056395802  | -3.766908349 | -4.730697034 | -0.894110176 |
| ENSG00000203805 | PPAPDC1A      | phosphatidic acid phosphatase type 2 domain containing 1A [Source:HGNC Symbol;Acc:23531]                             | -2.735050911 | -0.010591472 | 10.40521638 | 0.001256598 | 0.012612684 | 1.268770164  | 0.947543428  | -4.621297774 | -3.888428289 | -2.274700861 |
| ENSG00000184602 | SNN           | stannin [Source:HGNC Symbol;Acc:11149]                                                                               | 1.253245839  | 7.166066554  | 10.3846882  | 0.001270646 | 0.012746399 | 6.037556089  | 6.580060189  | 7.242368802  | 8.00930852   | 7.203188517  |
| ENSG00000204301 | NOTCH4        | notch 4 [Source:HGNC Symbol;Acc:7884]                                                                                | 1.765183997  | 1.633428885  | 10.37101584 | 0.001280091 | 0.012833807 | 0.597320328  | 0.881727766  | 0.778135316  | 2.086853261  | 2.5705316    |
| ENSG00000153132 | CLGN          | calmegin [Source:HGNC Symbol;Acc:2060]                                                                               | -1.79963121  | 1.30748339   | 10.36336513 | 0.001285407 | 0.012879747 | 2.217603867  | 1.878670417  | -1.886652327 | -0.655391447 | 1.515028015  |
| ENSG00000196576 | PLXNB2        | plexin B2 [Source:HGNC Symbol;Acc:9104]                                                                              | 1.550892903  | 8.214362074  | 10.33641108 | 0.001304314 | 0.013061738 | 6.493291736  | 7.530303488  | 8.162757618  | 9.21589627   | 8.360105702  |
| ENSG00000215873 | FEN1P1        | flap structure-specific endonuclease 1 pseudogene 1 [Source:HGNC Symbol;Acc:3651]                                    | -1.850112222 | 1.005139184  | 10.33448317 | 0.001305677 | 0.013067934 | 1.89628059   | 1.889873947  | -2.287883461 | -0.406691783 | 0.415212929  |
| ENSG00000178623 | GPR35         | G protein-coupled receptor 35 [Source:HGNC Symbol;Acc:4492]                                                          | 1.378770765  | 3.600313901  | 10.33147275 | 0.001307808 | 0.013081807 | 2.695223288  | 3.303012124  | 3.72302193   | 4.363361466  | 3.352708597  |
| ENSG00000167600 | CYP251        | cytochrome P450, family 2, subfamily 5, polypeptide 1 [Source:HGNC Symbol;Acc:15654]                                 | 1.348715214  | 3.357911756  | 10.33000019 | 0.001308852 | 0.013084792 | 2.359395999  | 2.802033765  | 3.352990378  | 3.863006047  | 3.82032647   |
| ENSG00000175544 | CABP4         | calcium binding protein 4 [Source:HGNC Symbol;Acc:1386]                                                              | 1.704650594  | 0.03434053   | 10.32280393 | 0.001313965 | 0.013128434 | -0.425964666 | -0.157588231 | 0.632982468  | 0.074465887  | -0.726511138 |
| ENSG00000182487 | NCF1B         | neutrophil cytosolic factor 1B pseudogene [Source:HGNC Symbol;Acc:32522]                                             | 1.445775312  | 4.929454574  | 10.32133651 | 0.00131501  | 0.013131402 | 4.004641099  | 4.028581215  | 4.326707234  | 5.784063743  | 5.477389978  |
| ENSG00000242612 | DECR2         | 2,4-dienoyl CoA reductase 2, peroxisomal [Source:HGNC Symbol;Acc:2754]                                               | -1.314343641 | 3.134009547  | 10.31765706 | 0.001317635 | 0.013150128 | 3.856229278  | 3.926195668  | 2.532495892  | 1.820287937  | 2.19580308   |
| ENSG00000198223 | CSF2RA        | colony stimulating factor 2 receptor, alpha, low-affinity (granulocyte-macrophage) [Source:HGNC Symbol;Acc:2435]     | 1.303624158  | 5.574103551  | 10.31518562 | 0.0013194   | 0.013160268 | 4.453639214  | 5.006527308  | 5.219896278  | 6.349277663  | 6.023837348  |
| ENSG00000213926 | MSRB1P1       | methionine sulfoxide reductase B1 pseudogene 1 [Source:HGNC Symbol;Acc:43985]                                        | 1.734985727  | 1.676286627  | 10.31354987 | 0.00132057  | 0.013164458 | 0.92386066   | 0.925936776  | 1.342349735  | 2.412303653  | 2.018338105  |
| ENSG00000232160 | RAP2C-AS1     | RAP2C antisense RNA 1 [Source:HGNC Symbol;Acc:40957]                                                                 | 1.633900436  | 0.722266668  | 10.31178189 | 0.001321836 | 0.013169597 | 0.174562846  | 0.376157587  | 1.379231566  | 0.61425099   | 0.518960621  |
| ENSG00000188906 | LRRK2         | leucine-rich repeat kinase 2 [Source:HGNC Symbol;Acc:18618]                                                          | 1.399730361  | 7.530324735  | 10.30886635 | 0.001323926 | 0.013176497 | 5.983087844  | 6.829538218  | 7.424330022  | 8.427967276  | 7.850983411  |
| ENSG00000125775 | SDCBP2        | syndecan binding protein (syntenin) 2 [Source:HGNC Symbol;Acc:15756]                                                 | 1.787047832  | -0.007254824 | 10.30872167 | 0.00132403  | 0.013176497 | -0.625332215 | -0.025429826 | -0.390491059 | 0.335717742  | 0.04992943   |
| ENSG00000167874 | TMEM88        | transmembrane protein 88 [Source:HGNC Symbol;Acc:32371]                                                              | 2.146490908  | 1.276737368  | 10.30713414 | 0.001325169 | 0.013180365 | 0.174562846  | 0.407677918  | 0.401591237  | 2.428399826  | 1.410986673  |
| ENSG00000197580 | BCO2          | beta-carotene oxygenase 2 [Source:HGNC Symbol;Acc:18503]                                                             | 1.800497554  | 0.091023507  | 10.30267472 | 0.001328375 | 0.013204773 | -0.775407551 | 0.095631612  | -0.271377577 | 0.301169826  | 0.415212929  |
| ENSG00000135972 | MRPS9         | mitochondrial ribosomal protein S9 [Source:HGNC Symbol;Acc:14501]                                                    | -1.062983732 | 4.751177457  | 10.27637759 | 0.001347442 | 0.013386729 | 5.314005372  | 5.32193738   | 4.256581955  | 3.808701883  | 4.422966584  |
| ENSG00000214176 | PLEKHM1P      | pleckstrin homology domain containing, family M (with RUN domain) member 1 pseudogene [Source:HGNC Symbol;Acc:35411] | 1.103640228  | 6.446377479  | 10.26600397 | 0.00135504  | 0.013454595 | 5.731582968  | 5.926320565  | 6.573570424  | 7.179490414  | 6.350572878  |
| ENSG00000246263 | KB-431C1.4    |                                                                                                                      | 1.686574829  | 3.166223712  | 10.2614546  | 0.001358385 | 0.013480189 | 2.455179325  | 2.199986264  | 2.752269159  | 4.105033564  | 3.403296679  |
| ENSG00000249943 | RP11-213L8.1  |                                                                                                                      | 1.575606734  | 1.321503172  | 10.25072425 | 0.001366309 | 0.013551165 | 0.714573228  | 0.836121102  | 1.644577544  | 1.770646721  | 1.177268129  |
| ENSG00000165949 | IFI27         | interferon, alpha-inducible protein 27 [Source:HGNC Symbol;Acc:5397]                                                 | -1.852187454 | 0.924859586  | 10.24192215 | 0.001372845 | 0.013608293 | 2.187493018  | 1.699255595  | -0.390491059 | -2.419096061 | -1.18885156  |
| ENSG00000116701 | NCF2          | neutrophil cytosolic factor 2 [Source:HGNC Symbol;Acc:7661]                                                          | 1.662434356  | 8.605655871  | 10.23780796 | 0.00137591  | 0.013630982 | 6.942255082  | 7.801767658  | 8.33676753   | 9.543475008  | 9.05476715   |
| ENSG00000169704 | GP9           | glycoprotein IX (platelet) [Source:HGNC Symbol;Acc:4444]                                                             | 1.680956024  | 3.775224652  | 10.22933669 | 0.001382244 | 0.013686005 | 2.304339895  | 3.352442362  | 3.407569039  | 4.785049495  | 3.889710441  |
| ENSG00000196295 | AC005154.6    |                                                                                                                      | 1.025862395  | 5.992041724  | 10.22704119 | 0.001383965 | 0.013695324 | 5.326724129  | 5.761510433  | 6.46945395   | 6.486768637  | 5.500810255  |
| ENSG00000143185 | XCL2          | chemokine (C motif) ligand 2 [Source:HGNC Symbol;Acc:10646]                                                          | -1.869350845 | 2.109799934  | 10.21400432 | 0.001393782 | 0.01378078  | 3.15547772   | 1.607225949  | 0.570569237  | -0.350682213 | 2.83459139   |
| ENSG00000148411 | NACC2         | NACC family member 2, BEN and BTB (POZ) domain containing [Source:HGNC Symbol;Acc:23846]                             | 1.236616387  | 5.933418768  | 10.21349043 | 0.001394171 | 0.01378078  | 4.720448566  | 5.375723561  | 5.67681722   | 6.666308482  | 6.404060387  |
| ENSG00000213630 | RP11-772E11.1 |                                                                                                                      | -1.468754371 | 2.57813417   | 10.20311548 | 0.001402036 | 0.013850726 | 3.53210123   | 3.134276817  | 1.746900214  | 0.722650538  | 2.076176073  |
| ENSG00000096063 | SRPK1         | SRSF protein kinase 1 [Source:HGNC Symbol;Acc:11305]                                                                 | -1.026416247 | 6.0040254    | 10.1825169  | 0.001417785 | 0.013998436 | 6.329459238  | 6.462104936  | 5.57418573   | 5.088337272  | 6.136868511  |
| ENSG00000119535 | CSF3R         | colony stimulating factor 3 receptor (granulocyte) [Source:HGNC Symbol;Acc:2439]                                     | 2.014942004  | 9.634869994  | 10.18003507 | 0.001419695 | 0.014009411 | 7.859285692  | 8.117779151  | 8.795230468  | 10.84627376  | 10.20413536  |
| ENSG00000224796 | RPL32P1       | ribosomal protein L32 pseudogene 1 [Source:HGNC Symbol;Acc:10339]                                                    | 2.413523262  | 0.959440962  | 10.17763964 | 0.00142154  | 0.014019743 | 0.46968809   | -0.583862591 | -0.10933503  | 2.387817579  | 0.264147325  |

|                 |               |                                                                                                 |              |              |             |             |             |              |              |              |              |              |
|-----------------|---------------|-------------------------------------------------------------------------------------------------|--------------|--------------|-------------|-------------|-------------|--------------|--------------|--------------|--------------|--------------|
| ENSG00000127337 | YEATS4        | YEATS domain containing 4 [Source:HGNC Symbol;Acc:24859]                                        | -1.15471239  | 4.360301093  | 10.17457219 | 0.001423907 | 0.014035201 | 5.017187838  | 4.830198586  | 3.892054915  | 2.952717131  | 4.247803769  |
| ENSG00000167768 | KRT1          | keratin 1 [Source:HGNC Symbol;Acc:6412]                                                         | 1.447658135  | 2.134714867  | 10.17271931 | 0.001425339 | 0.014041429 | 1.871242652  | 1.523383318  | 3.032495787  | 2.684399171  | -0.894110176 |
| ENSG00000073910 | FRY           | furry homolog (Drosophila) [Source:HGNC Symbol;Acc:20367]                                       | 1.326482548  | 5.306013433  | 10.17153592 | 0.001426254 | 0.014042564 | 4.061086952  | 4.796364522  | 5.075671919  | 6.168230563  | 5.566856794  |
| ENSG00000162645 | GBP2          | guanylate binding protein 2, interferon-inducible [Source:HGNC Symbol;Acc:4183]                 | 1.106885567  | 7.11661029   | 10.16530301 | 0.001431084 | 0.014082219 | 6.349994191  | 6.55344605   | 7.550452741  | 7.541613879  | 7.173354884  |
| ENSG00000226328 | CTA-217C.1    |                                                                                                 | 1.267335528  | 3.468709344  | 10.15166516 | 0.00144171  | 0.01417883  | 2.979215452  | 3.02165139   | 3.796441777  | 3.963082217  | 3.260920169  |
| ENSG00000184014 | DENND5A       | DENN/MADD domain containing 5A [Source:HGNC Symbol;Acc:19344]                                   | 1.187832487  | 7.208103653  | 10.14594018 | 0.001446194 | 0.014214968 | 6.010579004  | 6.649270053  | 7.386051389  | 7.898120176  | 7.395499534  |
| ENSG00000237766 | GGTA2P        | glycoprotein, alpha-galactosyltransferase 2, pseudogene [Source:HGNC Symbol;Acc:4254]           | 2.12158892   | 0.447671369  | 10.14441064 | 0.001447394 | 0.014218806 | -1.350769713 | -0.204475541 | -0.215316613 | 1.0274492    | 1.259453775  |
| ENSG00000205565 | RP11-497H16.6 |                                                                                                 | 1.78896122   | 1.73837758   | 10.13650972 | 0.001453611 | 0.014271895 | -0.196880952 | 0.881727766  | 1.360908506  | 2.056104393  | 2.807527639  |
| ENSG00000175866 | BAIAP2        | BAI1-associated protein 2 [Source:HGNC Symbol;Acc:947]                                          | 1.340021305  | 3.036572647  | 10.13196721 | 0.001457198 | 0.014299112 | 2.060341768  | 2.369639072  | 2.985428851  | 3.439318024  | 3.663137444  |
| ENSG00000166025 | AMOTL1        | angiominin like 1 [Source:HGNC Symbol;Acc:17811]                                                | -1.554775272 | 2.708856643  | 10.12606475 | 0.001461872 | 0.014336961 | 3.43292027   | 3.247479563  | 0.365283811  | 1.75796486   | 2.893690069  |
| ENSG00000092051 | JPH4          | junctophilin 4 [Source:HGNC Symbol;Acc:20156]                                                   | 1.732454123  | 0.73280171   | 10.10891576 | 0.001475537 | 0.014462903 | -0.425964666 | 0.438524285  | 0.721814282  | 0.773941511  | 1.374569317  |
| ENSG00000079616 | KIF22         | kinesin family member 22 [Source:HGNC Symbol;Acc:6391]                                          | -1.128127354 | 6.2966324    | 10.09923719 | 0.001483307 | 0.014530947 | 6.775578084  | 6.783725989  | 6.047135854  | 5.22592584   | 6.118404916  |
| ENSG00000101977 | MCF2          | MCF.2 cell line derived transforming sequence [Source:HGNC Symbol;Acc:6940]                     | 1.68004322   | 0.417255154  | 10.09809315 | 0.001484228 | 0.014531861 | 0.214927798  | 0.056395802  | 0.6928072    | 0.722650538  | -0.095747566 |
| ENSG00000186767 | SPIN4         | spindlin family, member 4 [Source:HGNC Symbol;Acc:27040]                                        | -1.23214769  | 3.412635423  | 10.09680587 | 0.001485265 | 0.01453391  | 4.120728458  | 3.912527782  | 2.548775847  | 2.483362921  | 3.178820438  |
| ENSG00000232742 | RHOQP2        | ras homolog family member Q pseudogene 2 [Source:HGNC Symbol;Acc:37836]                         | 1.543081744  | 2.534594045  | 10.08227876 | 0.001497021 | 0.01464078  | 1.725181674  | 2.077947121  | 2.340128686  | 3.211794066  | 2.772967998  |
| ENSG00000170390 | DCLK2         | doublecortin-like kinase 2 [Source:HGNC Symbol;Acc:19002]                                       | 2.109096066  | 0.21156423   | 10.08104105 | 0.001498027 | 0.014642461 | -0.425964666 | -0.252938016 | -2.073364206 | 1.224680533  | 0.415212929  |
| ENSG00000142552 | RCN3          | reticulocalbin 3, EF-hand calcium binding domain [Source:HGNC Symbol;Acc:21145]                 | 1.490687257  | 4.322207016  | 10.07239617 | 0.001505072 | 0.014703135 | 3.583106845  | 3.53121644   | 3.885660513  | 5.335612556  | 4.39369447   |
| ENSG00000100373 | UPK3A         | uropod 3 [Source:HGNC Symbol;Acc:12580]                                                         | 1.872233299  | 1.138228514  | 10.07002475 | 0.00150701  | 0.014713883 | 0.000762307  | 0.789025519  | 0.6928072    | 2.014059105  | 1.218946104  |
| ENSG00000138796 | HADH          | hydroxyacyl-CoA dehydrogenase [Source:HGNC Symbol;Acc:4799]                                     | -1.091498378 | 4.488589782  | 10.0666712  | 0.001509756 | 0.014732495 | 5.03843049   | 5.039598485  | 3.945292586  | 3.45118362   | 4.311798918  |
| ENSG00000229161 | TCP1P1        | t-complex 1 pseudogene 1 [Source:HGNC Symbol;Acc:11659]                                         | -1.002425736 | 5.712848703  | 10.05504459 | 0.001519313 | 0.014817526 | 6.218439122  | 6.167509445  | 5.31814041   | 5.023588668  | 5.432701873  |
| ENSG00000230453 | ANKRD18B      | ankyrin repeat domain 18B [Source:HGNC Symbol;Acc:23644]                                        | -7.245673581 | -0.928199885 | 10.05267824 | 0.001521266 | 0.014828333 | 0.292419846  | 0.016063025  | -7.002070102 | -7.002070102 | -3.754655114 |
| ENSG00000204764 | RANBP17       | RAN binding protein 17 [Source:HGNC Symbol;Acc:14428]                                           | -1.927593139 | 0.369027755  | 10.0434927  | 0.00152887  | 0.014894185 | 1.361587606  | 1.184348258  | -2.845623393 | -1.572251189 | -0.257803757 |
| ENSG00000167992 | VWCE          | von Willebrand factor C and EGF domains [Source:HGNC Symbol;Acc:26487]                          | -1.976723072 | 0.841094085  | 10.04243654 | 0.001529747 | 0.014894461 | 1.752861822  | 1.634124584  | -2.539967122 | -2.419096061 | 0.872340852  |
| ENSG00000189269 | C22orf43      | chromosome 22 open reading frame 43 [Source:HGNC Symbol;Acc:28031]                              | 1.890348337  | -0.024265894 | 10.0321667  | 0.0015383   | 0.014969431 | -1.132483902 | 0.207316148  | 0.721814282  | -0.146146183 | -1.083770229 |
| ENSG00000054967 | RELT          | RELT tumor necrosis factor receptor [Source:HGNC Symbol;Acc:13764]                              | 1.506321729  | 6.870407001  | 10.0239954  | 0.001545139 | 0.015019336 | 5.887992541  | 5.926320565  | 6.295262663  | 7.99586966   | 7.032177549  |
| ENSG00000181016 | LSMEM1        | leucine-rich single-pass membrane protein 1 [Source:HGNC Symbol;Acc:22036]                      | 1.791084263  | 1.257202852  | 10.0240345  | 0.001545106 | 0.015019336 | 4.435934254  | 0.376157587  | 0.832340008  | 1.926103707  | 1.788521245  |
| ENSG00000232368 | FTLP2         | ferritin, light polypeptide pseudogene 2 [Source:HGNC Symbol;Acc:4001]                          | 1.373469529  | 3.439044445  | 10.01759059 | 0.001550522 | 0.015063314 | 2.680885373  | 3.066774989  | 3.30587588   | 4.006617121  | 3.72229752   |
| ENSG00000126467 | TSKS          | testis-specific serine kinase substrate [Source:HGNC Symbol;Acc:30719]                          | 1.593674809  | 0.934384472  | 10.01525    | 0.001552493 | 0.015074127 | 0.292419846  | 0.881727766  | 1.285196495  | 1.224680533  | 0.518960621  |
| ENSG00000214391 | RP11-121L10.3 |                                                                                                 | -1.2240155   | 7.476248798  | 10.01063386 | 0.001556389 | 0.015103603 | 7.985144095  | 7.892114059  | 6.355500878  | 7.03717196   | 7.538151092  |
| ENSG00000168062 | BATF2         | basic leucine zipper transcription factor, ATF-like 2 [Source:HGNC Symbol;Acc:25163]            | 1.813722956  | 0.476020279  | 10.00930459 | 0.001557513 | 0.015106157 | -0.14487434  | -0.112176905 | -0.161352853 | 1.109604583  | 0.84598249   |
| ENSG00000198585 | NUDT16        | nudix (nucleoside diphosphate linked moiety X)-type motif 16 [Source:HGNC Symbol;Acc:26442]     | 1.0404393    | 5.937953065  | 10.00803792 | 0.001558585 | 0.015108203 | 5.064896475  | 5.378708918  | 6.020388228  | 6.478095851  | 6.269221328  |
| ENSG00000253193 | FCGR1C        | Fc fragment of IgG, high affinity 1c, receptor (CD64), pseudogene [Source:HGNC Symbol;Acc:3615] | 1.874669527  | 0.45839973   | 10.00609604 | 0.001560229 | 0.015115795 | -0.489407866 | -1.191564836 | -0.390491059 | 0.03296005   | 1.895203721  |
| ENSG00000198734 | F5            | coagulation factor V (proaccelerin, labile factor) [Source:HGNC Symbol;Acc:3542]                | 1.218706054  | 5.635604585  | 9.999541675 | 0.001565792 | 0.015161322 | 4.466234785  | 5.340430139  | 5.624975047  | 6.261030623  | 5.897988131  |
| ENSG00000272888 | AC013394.2    |                                                                                                 | 1.037556089  | 6.33490741   | 9.991178852 | 0.001572919 | 0.015221934 | 5.853250786  | 5.899549479  | 6.755093741  | 6.937712694  | 5.787196413  |
| ENSG00000185829 | ARL17A        | ADP-ribosylation factor-like 17A [Source:HGNC Symbol;Acc:24096]                                 | 1.59867346   | 1.517224788  | 9.989300302 | 0.001574524 | 0.015229076 | 0.174562846  | 0.881727766  | 1.205290011  | 1.224680533  | 2.693890668  |



|                 |                |                                                                                                                     |              |              |             |             |             |              |              |              |              |              |
|-----------------|----------------|---------------------------------------------------------------------------------------------------------------------|--------------|--------------|-------------|-------------|-------------|--------------|--------------|--------------|--------------|--------------|
| ENSG00000224411 | RP11-1033A18.1 |                                                                                                                     | -1.24645112  | 8.200677633  | 9.979986285 | 0.001582509 | 0.015297874 | 8.712689107  | 8.779231646  | 7.543107205  | 7.286017903  | 8.07283623   |
| ENSG00000227502 | RP1-249H1.4    |                                                                                                                     | -2.525976171 | 0.270164805  | 9.975032038 | 0.001586772 | 0.015330649 | 1.16956809   | 0.016063025  | -3.766908349 | -3.360122781 | 1.239342106  |
| ENSG00000119729 | RHOQ           | ras homolog family member Q<br>[Source:HGNC Symbol;Acc:17736]                                                       | 1.135881218  | 6.168330729  | 9.960989436 | 0.001598921 | 0.015431038 | 5.361976146  | 5.635721147  | 6.140055546  | 6.835419742  | 6.388164233  |
| ENSG00000273151 | RP11-449P15.2  |                                                                                                                     | 1.863757318  | 2.919949379  | 9.96167032  | 0.00159833  | 0.015431038 | 1.819824215  | 2.08771013   | 2.085000104  | 4.225075169  | 2.765955603  |
| ENSG00000125319 | C17orf53       | chromosome 17 open reading frame 53<br>[Source:HGNC Symbol;Acc:28460]                                               | -1.623614268 | 1.582502781  | 9.95413945  | 0.001604881 | 0.01548005  | 2.42108026   | 2.304152017  | -0.907612816 | 0.03296005   | 1.498200525  |
| ENSG00000261485 | PAN3-AS1       | PAN3 antisense RNA 1 [Source:HGNC<br>Symbol;Acc:39932]                                                              | 1.652824343  | 0.591679429  | 9.951060996 | 0.001607567 | 0.015497442 | -0.306880589 | -0.025429826 | 0.858697288  | 0.74852395   | 0.997359302  |
| ENSG00000263244 | RP11-473I1.10  |                                                                                                                     | 1.173497559  | 6.888353506  | 9.947394412 | 0.001610772 | 0.015519817 | 5.974296451  | 6.363080927  | 7.031567709  | 7.698965506  | 6.758232955  |
| ENSG00000184674 | GSTT1          | glutathione S-transferase theta 1<br>[Source:HGNC Symbol;Acc:4641]                                                  | -2.116231151 | 2.858810716  | 9.944758106 | 0.001613081 | 0.015533533 | 3.683607578  | 3.502308971  | 2.039642018  | -7.002070102 | 2.944263918  |
| ENSG00000153064 | BANK1          | B-cell scaffold protein with ankyrin repeats 1<br>[Source:HGNC Symbol;Acc:18233]                                    | -1.151881996 | 6.237527559  | 9.93980541  | 0.001617426 | 0.015566843 | 6.894902327  | 6.463980227  | 5.860029792  | 5.483527863  | 6.063698636  |
| ENSG00000139890 | REM2           | RAS (RAD and GEM)-like GTP binding 2<br>[Source:HGNC Symbol;Acc:20248]                                              | 1.552063818  | 2.538835506  | 9.937587659 | 0.001619376 | 0.015577069 | 1.920891399  | 1.355744383  | 2.358715867  | 3.314964122  | 2.880764656  |
| ENSG00000100284 | TOM1           | target of myb1 (chicken) [Source:HGNC<br>Symbol;Acc:11982]                                                          | 1.18328533   | 6.136289442  | 9.926901284 | 0.001628805 | 0.015659186 | 5.296478906  | 5.667804805  | 6.064224218  | 6.978596154  | 6.092712941  |
| ENSG00000238057 | ZEB2-AS1       | ZEB2 antisense RNA 1 [Source:HGNC<br>Symbol;Acc:37149]                                                              | 1.972909741  | 1.535488432  | 9.925415381 | 0.001630121 | 0.015663255 | -0.250832646 | 1.010487126  | 1.205290011  | 2.491046607  | 1.774613685  |
| ENSG00000114126 | TFDP2          | transcription factor Dp-2 (E2F dimerization<br>partner 2) [Source:HGNC Symbol;Acc:11751]                            | -1.018712466 | 5.481784248  | 9.910733966 | 0.001643176 | 0.01578006  | 5.907365734  | 5.970523579  | 5.125366032  | 4.674675734  | 5.321115655  |
| ENSG00000145491 | ROPN1L         | rhopilin associated tail protein 1-like<br>[Source:HGNC Symbol;Acc:24060]                                           | 1.698879797  | 0.481759867  | 9.896119402 | 0.001656277 | 0.015897177 | -0.094677427 | 0.133828548  | -0.10933503  | 0.61425099   | 1.155968757  |
| ENSG00000188026 | RILPL1         | Rab interacting lysosomal protein-like 1<br>[Source:HGNC Symbol;Acc:26814]                                          | 1.533131112  | 1.31055277   | 9.883931593 | 0.001667283 | 0.015994074 | 0.657137645  | 0.947543428  | 1.689321579  | 1.27894994   | 1.580441325  |
| ENSG00000204472 | AIF1           | allograft inflammatory factor 1<br>[Source:HGNC Symbol;Acc:352]                                                     | 1.399476847  | 7.449663653  | 9.878849679 | 0.001671894 | 0.016023466 | 6.122897312  | 6.903261088  | 7.297300326  | 8.298351105  | 7.729855779  |
| ENSG00000219200 | RNASEK         | ribonuclease, RNase K [Source:HGNC<br>Symbol;Acc:33911]                                                             | 1.53327601   | 2.750029204  | 9.878543445 | 0.001672173 | 0.016023466 | 2.049222129  | 2.107040151  | 2.56487414   | 3.690214061  | 2.602374247  |
| ENSG00000271605 | MILR1          | mast cell immunoglobulin-like receptor 1<br>[Source:HGNC Symbol;Acc:27570]                                          | 1.368281444  | 3.028585642  | 9.875744527 | 0.001674718 | 0.016039104 | 2.217603867  | 2.144940142  | 2.860570679  | 3.516638688  | 3.674416329  |
| ENSG00000093134 | VNN3           | vanin 3 [Source:HGNC Symbol;Acc:16431]                                                                              | 1.911858201  | 3.665348973  | 9.863045715 | 0.001686317 | 0.016141383 | 2.614540713  | 2.492318033  | 2.56487414   | 4.78035404   | 4.170253557  |
| ENSG00000163485 | ADORA1         | adenosine A1 receptor [Source:HGNC<br>Symbol;Acc:262]                                                               | 1.626832634  | 0.26245469   | 9.824907196 | 0.001721644 | 0.016470549 | -0.046168491 | 0.343933181  | 0.602113338  | 0.434658742  | -0.726511138 |
| ENSG0000040275  | SPDL1          | spindle apparatus coiled-coil protein 1<br>[Source:HGNC Symbol;Acc:26010]                                           | -1.158985504 | 4.070771533  | 9.811880155 | 0.001733882 | 0.016571495 | 4.7274414    | 4.6359475    | 3.579853854  | 2.749909693  | 3.7756399    |
| ENSG00000138744 | NAAA           | N-acyl ethanolamine acid amidase<br>[Source:HGNC Symbol;Acc:736]                                                    | 1.110789389  | 6.819837406  | 9.811665933 | 0.001734084 | 0.016571495 | 5.872304469  | 6.429366465  | 7.04274659   | 7.414300622  | 6.875264274  |
| ENSG00000131759 | RARA           | retinoic acid receptor, alpha [Source:HGNC<br>Symbol;Acc:9864]                                                      | 1.167386184  | 6.749863845  | 9.810100759 | 0.00173556  | 0.016576581 | 5.709680306  | 6.269679133  | 6.674390547  | 7.485744774  | 6.988413856  |
| ENSG00000239961 | LILRA4         | leukocyte immunoglobulin-like receptor,<br>subfamily A (with TM domain), member 4<br>[Source:HGNC Symbol;Acc:15503] | 2.089040099  | 2.127234329  | 9.805552649 | 0.001739857 | 0.01660859  | 0.133035942  | 0.310972527  | -0.453950945 | 2.475638093  | 3.700395796  |
| ENSG00000113368 | LMNB1          | lamin B1 [Source:HGNC Symbol;Acc:6637]                                                                              | -1.045688206 | 6.413004705  | 9.803886981 | 0.001741434 | 0.016614605 | 6.539219722  | 6.76597427   | 5.483939025  | 5.717666472  | 6.983888028  |
| ENSG00000088826 | SMOX           | spermine oxidase [Source:HGNC<br>Symbol;Acc:15862]                                                                  | 1.416505572  | 4.036971006  | 9.790234701 | 0.001754411 | 0.016729321 | 2.894768068  | 3.573519788  | 3.782742091  | 4.894834669  | 4.24276145   |
| ENSG00000146859 | TMEM140        | transmembrane protein 140 [Source:HGNC<br>Symbol;Acc:21870]                                                         | 1.163991037  | 4.266711825  | 9.78270119  | 0.001761613 | 0.016788882 | 3.690780833  | 3.795280718  | 4.36857882   | 4.786611257  | 4.386854181  |
| ENSG00000125900 | SIRPD          | signal-regulatory protein delta<br>[Source:HGNC Symbol;Acc:16248]                                                   | 1.795927229  | 0.666236319  | 9.780128657 | 0.00176408  | 0.016803266 | -0.365194284 | 0.583576386  | 0.505333341  | 1.089500161  | 0.872340852  |
| ENSG00000140961 | OSGIN1         | oxidative stress induced growth inhibitor 1<br>[Source:HGNC Symbol;Acc:30093]                                       | 1.776734035  | 0.677829424  | 9.775313516 | 0.001768706 | 0.016838192 | -0.365194284 | 0.637745977  | 0.401591237  | 1.048430793  | 0.997359302  |
| ENSG00000255422 | AP002954.4     |                                                                                                                     | 1.690027937  | 0.778538396  | 9.771818505 | 0.001772071 | 0.016861087 | -0.14487434  | 0.968831255  | 1.285196495  | 1.187332556  | -0.506781561 |
| ENSG00000242324 | RP4-576H24.2   |                                                                                                                     | 1.78987045   | 0.16041496   | 9.769140529 | 0.001774654 | 0.016876517 | -0.555769858 | 0.207316148  | -0.329705368 | 0.58582888   | 0.223773082  |
| ENSG00000005102 | MEOX1          | mesenchyme homeobox 1 [Source:HGNC<br>Symbol;Acc:7013]                                                              | 1.950891545  | 0.03145325   | 9.762200363 | 0.001781366 | 0.016931173 | -1.350769713 | 0.133828548  | 0.934997507  | -0.956081001 | -0.095747566 |
| ENSG00000182578 | CSF1R          | colony stimulating factor 1 receptor<br>[Source:HGNC Symbol;Acc:2433]                                               | 1.492816047  | 8.275479236  | 9.75702105  | 0.001786391 | 0.016969752 | 6.530250323  | 7.680800692  | 8.254169536  | 9.246646814  | 8.403537164  |
| ENSG00000108924 | HLF            | hepatic leukemia factor [Source:HGNC<br>Symbol;Acc:4977]                                                            | 1.799140037  | 0.592283175  | 9.753251604 | 0.001790058 | 0.016995387 | -0.094677427 | 0.277241192  | 1.550698027  | -0.406691783 | 0.551948963  |
| ENSG00000242338 | BMS1P4         | BMS1 pseudogene 4 [Source:HGNC<br>Symbol;Acc:23652]                                                                 | 1.686650659  | 0.328430132  | 9.734218314 | 0.001808689 | 0.017162994 | -0.046168491 | 0.133828548  | 0.437007322  | 0.823471408  | -0.316136847 |
| ENSG00000166278 | C2             | complement component 2 [Source:HGNC<br>Symbol;Acc:1248]                                                             | 1.90027203   | -0.130681202 | 9.728983371 | 0.001813848 | 0.017202647 | -0.365194284 | -0.932821174 | -1.438615935 | 0.301169826  | 0.485200289  |
| ENSG00000138346 | DNA2           | DNA replication helicase/nuclease 2<br>[Source:HGNC Symbol;Acc:2939]                                                | -1.207266081 | 3.515380915  | 9.723809134 | 0.001818961 | 0.017241619 | 4.126030116  | 4.038682887  | 2.665349954  | 2.27662903   | 3.561506932  |

|                 |               |                                                                                               |              |              |             |             |             |              |              |              |              |              |
|-----------------|---------------|-----------------------------------------------------------------------------------------------|--------------|--------------|-------------|-------------|-------------|--------------|--------------|--------------|--------------|--------------|
| ENSG00000163162 | RNF149        | ring finger protein 149 [Source:HGNC Symbol;Acc:23137]                                        | 1.28628814   | 7.074530849  | 9.721847783 | 0.001820904 | 0.017241619 | 6.066797471  | 6.4375017    | 6.921397365  | 7.912496459  | 7.301940144  |
| ENSG00000264290 | RP11-6813.4   |                                                                                               | 1.799635429  | -0.176435245 | 9.722073676 | 0.001820668 | 0.017241619 | -1.132483902 | -0.30308518  | 0.250534523  | 0.074465887  | -0.649489103 |
| ENSG00000134824 | FADS2         | fatty acid desaturase 2 [Source:HGNC Symbol;Acc:3575]                                         | -1.777373611 | 6.292283084  | 9.719527309 | 0.001823204 | 0.017247692 | 6.889457078  | 6.796060714  | 3.510897178  | 5.886657785  | 6.512779767  |
| ENSG00000197582 | GPX1P1        | glutathione peroxidase pseudogene 1 [Source:HGNC Symbol;Acc:4560]                             | 1.24062682   | 5.911858633  | 9.719219006 | 0.00182351  | 0.017247692 | 5.082729028  | 5.463639162  | 5.660054909  | 6.750342465  | 6.011290397  |
| ENSG00000225873 | LINC00694     | long intergenic non-protein coding RNA 694 [Source:HGNC Symbol;Acc:44570]                     | 1.814005743  | 1.013213016  | 9.708741152 | 0.001833936 | 0.017336966 | 0.133035942  | -0.025429826 | 0.471574783  | 1.820287937  | 1.498200525  |
| ENSG00000139926 | FRMD6         | FERM domain containing 6 [Source:HGNC Symbol;Acc:19839]                                       | -1.671635061 | 1.152136987  | 9.705594416 | 0.001837079 | 0.017357331 | 2.167064212  | 1.785765038  | -0.453950945 | -1.133744865 | 0.763888603  |
| ENSG00000164850 | GPER1         | G protein-coupled estrogen receptor 1 [Source:HGNC Symbol;Acc:4485]                           | 1.83529677   | 0.679621404  | 9.703655416 | 0.001839018 | 0.017366308 | 0.329658892  | -0.252938016 | 0.125863448  | 1.27894994   | 1.090116303  |
| ENSG00000047634 | SCML1         | sex comb on midleg-like 1 (Drosophila) [Source:HGNC Symbol;Acc:10580]                         | 1.371790132  | 3.49178513   | 9.701935126 | 0.001840741 | 0.017373227 | 2.42108026   | 3.552523163  | 4.203585614  | 3.965841977  | 2.267069113  |
| ENSG00000258011 | HMG1A1P3      | high mobility group AT-hook 1 pseudogene 3 [Source:HGNC Symbol;Acc:13323]                     | -1.185105701 | 3.641724675  | 9.686975954 | 0.001855787 | 0.017505826 | 4.316608668  | 4.296139761  | 2.793840748  | 2.498689587  | 3.314770126  |
| ENSG00000215218 | UBE2QL1       | ubiquitin-conjugating enzyme E2Q family-like 1 [Source:HGNC Symbol;Acc:37269]                 | -3.069559847 | -0.414598402 | 9.684943682 | 0.001857841 | 0.017515787 | 0.94800933   | 0.310972527  | -3.766908349 | -7.002070102 | -2.274700861 |
| ENSG00000116649 | SRM           | spermidine synthase [Source:HGNC Symbol;Acc:11296]                                            | -1.038766249 | 5.021262351  | 9.681298929 | 0.00186153  | 0.017541146 | 5.593926721  | 5.474842644  | 4.68073531   | 4.222769665  | 4.643690936  |
| ENSG00000059377 | TBXAS1        | thromboxane A synthase 1 (platelet) [Source:HGNC Symbol;Acc:11609]                            | 1.288678403  | 6.916073761  | 9.672132349 | 0.00187084  | 0.017619423 | 5.564941291  | 6.183531466  | 6.578534562  | 7.868930563  | 7.268528284  |
| ENSG00000261026 | CTD-3247F14.2 |                                                                                               | 2.81543799   | 1.942720728  | 9.669082225 | 0.001873949 | 0.017639236 | 0.174562846  | 0.207316148  | -2.073364206 | 3.47849629   | 2.390748373  |
| ENSG00000141076 | CIRH1A        | cirrhosis, autosomal recessive 1A (cirhin) [Source:HGNC Symbol;Acc:1983]                      | -1.063784766 | 5.009434663  | 9.667394482 | 0.001875671 | 0.017645986 | 5.576605438  | 5.564968749  | 4.711792159  | 4.025258184  | 4.536516067  |
| ENSG00000151287 | TEX30         | testis expressed 30 [Source:HGNC Symbol;Acc:25188]                                            | -1.295560746 | 3.117763155  | 9.666167949 | 0.001876924 | 0.017646056 | 3.975567801  | 3.545455828  | 2.171650019  | 2.126858114  | 2.772967998  |
| ENSG00000121858 | TNFSF10       | tumor necrosis factor (ligand) superfamily, member 10 [Source:HGNC Symbol;Acc:11925]          | 1.075269703  | 6.802936199  | 9.665419237 | 0.001877689 | 0.017646056 | 5.720235091  | 6.2094731    | 6.897760548  | 7.06607384   | 7.47639523   |
| ENSG00000112964 | GHR           | growth hormone receptor [Source:HGNC Symbol;Acc:4263]                                         | -3.59964507  | -0.511735334 | 9.659320996 | 0.001883932 | 0.017695256 | 1.018120824  | 0.095631612  | -4.621297774 | -7.002070102 | -3.754655114 |
| ENSG00000106484 | MEST          | mesoderm specific transcript [Source:HGNC Symbol;Acc:7028]                                    | -1.2624576   | 3.646431965  | 9.645567402 | 0.001898091 | 0.017809182 | 4.525609656  | 4.121805905  | 2.642776537  | 2.787834084  | 3.125029543  |
| ENSG00000210196 | MT-TP         | mitochondrially encoded tRNA proline [Source:HGNC Symbol;Acc:7494]                            | 1.350494228  | 2.69810156   | 9.644161283 | 0.001899544 | 0.0178133   | 2.304339895  | 1.184348258  | 2.665349954  | 3.535338275  | 2.814341322  |
| ENSG00000245532 | NEAT1         | nuclear paraspeckle assembly transcript 1 (non-protein coding) [Source:HGNC Symbol;Acc:30815] | 1.589585118  | 9.566327742  | 9.637728223 | 0.001906209 | 0.017866253 | 8.636027243  | 8.567379764  | 9.684287714  | 10.5932589   | 9.334617452  |
| ENSG00000132341 | RAN           | RAN, member RAS oncogene family [Source:HGNC Symbol;Acc:9846]                                 | -1.013428784 | 6.037899557  | 9.635004781 | 0.001909037 | 0.017883216 | 6.530250323  | 6.434157451  | 5.698868248  | 5.347300717  | 5.824799093  |
| ENSG00000088053 | GP6           | glycoprotein VI (platelet) [Source:HGNC Symbol;Acc:14388]                                     | 1.913485462  | 2.342679462  | 9.631452167 | 0.001912733 | 0.017908283 | 0.502670228  | 2.077947121  | 2.107155349  | 3.340707202  | 2.31590077   |
| ENSG00000120256 | LRP11         | low density lipoprotein receptor-related protein 11 [Source:HGNC Symbol;Acc:16936]            | -1.36317991  | 2.402386878  | 9.625652906 | 0.001918782 | 0.017955342 | 2.913284701  | 3.212211862  | 1.432844522  | 0.696304622  | 2.32547185   |
| ENSG00000257078 | RP3-461F17.2  |                                                                                               | 1.461329407  | 1.832776811  | 9.62342962  | 0.001921106 | 0.017957947 | 1.448792784  | 1.434365866  | 2.5886897    | 1.891686981  | 1.259453775  |
| ENSG00000224025 | RP11-274B18.3 |                                                                                               | 1.678681016  | 1.383890806  | 9.624103907 | 0.001920401 | 0.017957947 | 0.133035942  | 0.310972527  | 0.9100098    | 1.770646721  | 2.372397358  |
| ENSG00000253818 | IGLV1-41      | immunoglobulin lambda variable 1-41 (pseudogene) [Source:HGNC Symbol;Acc:5878]                | -2.587054779 | -0.149686433 | 9.612529684 | 0.001932542 | 0.018055233 | 1.127895066  | 0.016063025  | -3.233942493 | -4.730697034 | -0.147769603 |
| ENSG00000132361 | CLUH          | clustered mitochondria (cluA/CLU1) homolog [Source:HGNC Symbol;Acc:29094]                     | -1.007272572 | 5.968389204  | 9.606385151 | 0.00193902  | 0.018106111 | 6.505038703  | 6.478431669  | 5.698868248  | 5.207388815  | 5.455763778  |
| ENSG00000160339 | FCN2          | ficolin (collagen/fibrinogen domain containing lectin) 2 [Source:HGNC Symbol;Acc:3624]        | 1.878892665  | 1.484638435  | 9.598241822 | 0.001947638 | 0.018176916 | -0.14487434  | 1.09035546   | 1.32354911   | 2.371259556  | 1.580441325  |
| ENSG00000204466 | DGKK          | diacylglycerol kinase, kappa [Source:HGNC Symbol;Acc:32395]                                   | 2.411706312  | 1.657797346  | 9.596979628 | 0.001948977 | 0.01817975  | 0.92386066   | 0.016063025  | -0.329705368 | 3.044343756  | 1.81594051   |
| ENSG00000174791 | RIN1          | Ras and Rab interactor 1 [Source:HGNC Symbol;Acc:18749]                                       | 1.291094187  | 3.956317859  | 9.590838716 | 0.001955506 | 0.018230965 | 2.723478589  | 3.667655396  | 4.190675219  | 4.532993113  | 4.054164368  |
| ENSG00000080824 | HSP90AA1      | heat shock protein 90kDa alpha (cytosolic), class A member 1 [Source:HGNC Symbol;Acc:5253]    | -1.300868195 | 8.629783152  | 9.580603395 | 0.001966438 | 0.018323149 | 9.144878678  | 9.118205518  | 8.030981562  | 7.989442081  | 8.421219819  |
| ENSG00000088367 | EPB41L1       | erythrocyte membrane protein band 4.1-like 1 [Source:HGNC Symbol;Acc:3378]                    | -2.857293265 | -0.18088912  | 9.578028062 | 0.001969198 | 0.018339135 | 1.18996172   | 0.376157587  | -7.002070102 | -3.360122781 | -1.18885156  |
| ENSG00000100116 | GCAT          | glycine C-acetyltransferase [Source:HGNC Symbol;Acc:4188]                                     | -1.794200275 | 1.208694595  | 9.573988712 | 0.001973535 | 0.018360049 | 2.359395999  | 1.724506406  | -0.059127673 | -2.205328685 | 0.735452007  |

|                 |               |                                                                                                                  |              |             |             |             |             |             |              |              |              |              |
|-----------------|---------------|------------------------------------------------------------------------------------------------------------------|--------------|-------------|-------------|-------------|-------------|-------------|--------------|--------------|--------------|--------------|
| ENSG00000165682 | CLEC1B        | C-type lectin domain family 1, member B [Source:HGNC Symbol;Acc:24356]                                           | 1.875066322  | 2.142804633 | 9.574412381 | 0.00197308  | 0.018360049 | 0.657137645 | 1.773719635  | 1.674560554  | 3.03386134   | 2.435269945  |
| ENSG00000165209 | STRBP         | spermatid perinuclear RNA binding protein [Source:HGNC Symbol;Acc:16462]                                         | -1.025575496 | 5.420807736 | 9.571546386 | 0.001976163 | 0.018374753 | 5.910441444 | 5.809497926  | 5.006632866  | 4.54226781   | 5.400235998  |
| ENSG00000160447 | PKN3          | protein kinase N3 [Source:HGNC Symbol;Acc:17999]                                                                 | -1.30747153  | 2.909853652 | 9.568520138 | 0.001979423 | 0.018395324 | 3.733087128 | 3.590786525  | 2.311791045  | 1.314027603  | 2.164148811  |
| ENSG00000214212 | C19orf38      | chromosome 19 open reading frame 38 [Source:HGNC Symbol;Acc:34073]                                               | 1.284895785  | 6.268427446 | 9.561818686 | 0.001986662 | 0.01845283  | 5.034206909 | 5.839421768  | 6.037073363  | 7.091567975  | 6.540268057  |
| ENSG00000101336 | HCK           | hemopoietic cell kinase [Source:HGNC Symbol;Acc:4840]                                                            | 1.396585104  | 7.96680817  | 9.54443727  | 0.002005563 | 0.01861854  | 6.521727713 | 7.163685965  | 7.687721106  | 8.858363173  | 8.430673552  |
| ENSG00000273356 | RP11-804H8.6  |                                                                                                                  | 1.739528704  | 1.328628628 | 9.541652476 | 0.002008608 | 0.018636954 | 0.686141241 | 0.376157587  | 1.076464519  | 2.086853261  | 1.596341512  |
| ENSG00000120262 | CCDC170       | coiled-coil domain containing 170 [Source:HGNC Symbol;Acc:21177]                                                 | 1.435713201  | 2.248505372 | 9.53498824  | 0.002015915 | 0.018694866 | 1.287817526 | 1.647388141  | 2.233384453  | 2.697741416  | 2.751827722  |
| ENSG00000172824 | CES4A         | carboxylesterase 4A [Source:HGNC Symbol;Acc:26741]                                                               | 1.229663577  | 3.403489803 | 9.530895218 | 0.002020415 | 0.018726712 | 2.552892059 | 3.216667762  | 3.945292586  | 3.71994361   | 3.152175675  |
| ENSG00000198053 | SIRPA         | signal-regulatory protein alpha [Source:HGNC Symbol;Acc:9662]                                                    | 1.342071835  | 7.295719559 | 9.527887779 | 0.002023729 | 0.018727761 | 5.663940507 | 6.581788344  | 6.918268075  | 7.969985717  | 8.061605139  |
| ENSG00000114853 | ZBTB47        | zinc finger and BTB domain containing 47 [Source:HGNC Symbol;Acc:26955]                                          | 1.426282111  | 3.785520447 | 9.528493276 | 0.002023061 | 0.018727761 | 2.730456787 | 3.189723558  | 3.4515252    | 4.558813477  | 4.201775615  |
| ENSG00000234290 | AC116366.6    |                                                                                                                  | 2.48470555   | 3.093669963 | 9.523234577 | 0.002028867 | 0.018765413 | 2.103982592 | 0.637745977  | 1.285196495  | 4.649148511  | 3.168221511  |
| ENSG00000066336 | SPI1          | spleen focus forming virus (SFFV) proviral integration oncogene [Source:HGNC Symbol;Acc:11241]                   | 1.453634108  | 8.020786307 | 9.521421864 | 0.002030872 | 0.018774067 | 6.608088569 | 7.241729892  | 7.721998354  | 9.015043863  | 8.325944358  |
| ENSG00000213204 | C6orf165      | chromosome 6 open reading frame 165 [Source:HGNC Symbol;Acc:21405]                                               | 1.605831251  | 0.499638412 | 9.517455167 | 0.002035266 | 0.018804789 | 0.000762307 | 0.133828548  | 0.602113338  | 0.229488395  | 1.021113618  |
| ENSG00000270382 | RP1-152L7.9   |                                                                                                                  | 1.038145507  | 4.999017307 | 9.515968087 | 0.002036916 | 0.018810134 | 4.371207268 | 4.586881416  | 4.969322447  | 5.409439159  | 5.360054437  |
| ENSG00000161714 | PLCD3         | phospholipase C, delta 3 [Source:HGNC Symbol;Acc:9061]                                                           | 1.472994566  | 1.761984918 | 9.501833004 | 0.002052667 | 0.018945623 | 1.148882041 | 1.371815184  | 1.881530361  | 2.076676283  | 1.994537666  |
| ENSG00000227051 | C14orf132     | chromosome 14 open reading frame 132 [Source:HGNC Symbol;Acc:20346]                                              | 1.666928036  | 1.252091532 | 9.499610563 | 0.002055155 | 0.018958617 | 0.329658892 | 1.010487126  | 2.1289755    | 0.642123966  | 1.298855074  |
| ENSG00000198794 | SCAMP5        | secretory carrier membrane protein 5 [Source:HGNC Symbol;Acc:30386]                                              | -1.412874049 | 2.544244836 | 9.495671976 | 0.002059571 | 0.018989378 | 3.216393469 | 2.802033765  | 0.858697288  | 1.069111613  | 3.125029543  |
| ENSG00000203710 | CR1           | complement component (3b/4b) receptor 1 (Knops blood group) [Source:HGNC Symbol;Acc:2334]                        | 1.147270575  | 6.355019974 | 9.479079713 | 0.002078282 | 0.019151832 | 5.187866611 | 5.707920758  | 6.111570172  | 6.912900738  | 7.02961811   |
| ENSG00000197785 | ATAD3A        | ATPase family, AAA domain containing 3A [Source:HGNC Symbol;Acc:25567]                                           | -1.046743014 | 4.507716784 | 9.475321408 | 0.002082544 | 0.019171176 | 5.127030457 | 5.160167117  | 4.026005012  | 3.683523464  | 3.765128041  |
| ENSG00000126709 | IFI6          | interferon, alpha-inducible protein 6 [Source:HGNC Symbol;Acc:4054]                                              | 1.188687098  | 4.612260085 | 9.475302713 | 0.002082565 | 0.019171176 | 3.683607578 | 3.777294464  | 4.254101979  | 5.170781053  | 5.335397107  |
| ENSG00000182574 | RP3-341D10.1  |                                                                                                                  | 1.279038995  | 3.601094939 | 9.470937884 | 0.002087526 | 0.019206773 | 2.955587776 | 3.294606553  | 3.653213102  | 4.100017768  | 3.711388219  |
| ENSG00000260837 | RP11-434B12.1 |                                                                                                                  | 1.558514828  | 0.967804555 | 9.457975455 | 0.00210233  | 0.019332845 | 0.090278201 | 0.664086661  | 1.432844522  | 1.261086007  | 0.819133578  |
| ENSG00000253210 | RP11-809O17.1 |                                                                                                                  | 1.961564129  | 0.978943192 | 9.429501006 | 0.002135224 | 0.019625054 | 0.046214424 | -0.068151468 | -0.329705368 | 1.90325069   | 1.612068369  |
| ENSG00000108405 | P2RX1         | purinergic receptor P2X, ligand-gated ion channel, 1 [Source:HGNC Symbol;Acc:8533]                               | 1.424433692  | 6.067822978 | 9.417900076 | 0.002148775 | 0.019739266 | 5.060749778 | 5.296905755  | 5.430029956  | 7.079195854  | 6.393861558  |
| ENSG00000236530 | AC097711.1    |                                                                                                                  | -1.342298703 | 3.434317127 | 9.413830796 | 0.002153548 | 0.019766415 | 4.29323497  | 3.856523346  | 2.06249931   | 2.59453048   | 3.240829074  |
| ENSG00000137575 | SDCBP         | syndecan binding protein (syntenin) [Source:HGNC Symbol;Acc:10662]                                               | 1.257615626  | 6.978876885 | 9.413461755 | 0.002153982 | 0.019766415 | 5.713207155 | 6.416834926  | 6.825686891  | 7.637765624  | 7.491353223  |
| ENSG00000273033 | RP11-67L2.2   |                                                                                                                  | 1.323817314  | 3.901584686 | 9.411292334 | 0.002156532 | 0.019779475 | 2.688072143 | 3.590786525  | 4.068967903  | 4.551483264  | 3.974279416  |
| ENSG00000157601 | MX1           | myxovirus (influenza virus) resistance 1, interferon-inducible protein p78 (mouse) [Source:HGNC Symbol;Acc:7532] | 1.093490352  | 5.604616876 | 9.409091264 | 0.002159122 | 0.019792892 | 4.820306233 | 4.923101506  | 5.397814138  | 6.125674787  | 6.179052931  |
| ENSG00000077942 | FBLN1         | fibulin 1 [Source:HGNC Symbol;Acc:3600]                                                                          | -2.538810607 | 0.285342404 | 9.395609384 | 0.002175057 | 0.019918166 | 1.752861822 | 1.050973916  | -3.233942493 | -4.730697034 | -2.274700861 |
| ENSG00000075188 | NUP37         | nucleoporin 37kDa [Source:HGNC Symbol;Acc:29929]                                                                 | -1.142990519 | 4.251484829 | 9.395645178 | 0.002175014 | 0.019918166 | 4.985454998 | 4.685008352  | 3.366829833  | 3.439318024  | 4.033874407  |
| ENSG00000151779 | NBAS          | neuroblastoma amplified sequence [Source:HGNC Symbol;Acc:15625]                                                  | -1.045272452 | 5.660553606 | 9.381957525 | 0.002191314 | 0.020056581 | 6.085287286 | 6.121914966  | 5.439883439  | 4.791286425  | 5.459028447  |
| ENSG00000125347 | IRF1          | interferon regulatory factor 1 [Source:HGNC Symbol;Acc:6116]                                                     | 1.28932743   | 7.695004582 | 9.379693863 | 0.002194022 | 0.020070899 | 6.921443401 | 6.868641225  | 7.752188616  | 8.768358552  | 7.190478141  |
| ENSG00000009694 | TENM1         | teneurin transmembrane protein 1 [Source:HGNC Symbol;Acc:8117]                                                   | 1.532546317  | 2.52971177  | 9.373030087 | 0.002202012 | 0.020133502 | 1.018120824 | 2.377619831  | 3.049757403  | 3.221064093  | 1.908000984  |
| ENSG00000270610 | RP11-486O13.3 |                                                                                                                  | 1.218408457  | 4.035345519 | 9.372006633 | 0.002203249 | 0.020134326 | 3.428636013 | 3.777294464  | 4.894863265  | 3.874800997  | 3.681886894  |
| ENSG00000187699 | C2orf88       | chromosome 2 open reading frame 88 [Source:HGNC Symbol;Acc:28191]                                                | 1.262718133  | 5.001637445 | 9.369590321 | 0.002206148 | 0.020150329 | 4.131312362 | 4.459201101  | 4.745729503  | 5.994651253  | 4.895769655  |
| ENSG00000131979 | GCH1          | GTP cyclohydrolase 1 [Source:HGNC Symbol;Acc:4193]                                                               | 1.081180522  | 5.690499198 | 9.364101569 | 0.002212764 | 0.020200248 | 4.918288272 | 5.342470334  | 5.727754931  | 6.32905707   | 5.747697761  |
| ENSG00000111291 | GPRCSD        | G protein-coupled receptor, family C, group 5, member D [Source:HGNC Symbol;Acc:13310]                           | -2.006458824 | 0.041695596 | 9.361954373 | 0.002215358 | 0.020213415 | 1.268770164 | 0.98980953   | -2.539967122 | -2.97427061  | -2.832686105 |

|                 |               |                                                                                                                                      |              |             |              |             |             |              |              |              |              |              |
|-----------------|---------------|--------------------------------------------------------------------------------------------------------------------------------------|--------------|-------------|--------------|-------------|-------------|--------------|--------------|--------------|--------------|--------------|
| ENSG00000167711 | SERPINF2      | serpin peptidase inhibitor, clade F (alpha-2 antiplasmin, pigment epithelium derived factor), member 2 [Source:HGNC Symbol;Acc:9075] | 1.63270884   | 0.962755143 | 9.358764236  | 0.002219217 | 0.020238108 | 0.292419846  | 0.242702272  | 0.28980717   | 1.187332556  | 1.84284836   |
| ENSG00000258759 | RP11-1012A1.7 |                                                                                                                                      | -1.495300894 | 1.67558119  | 9.356476667  | 0.002221989 | 0.020242352 | 2.488491009  | 2.353543875  | 0.570569237  | -0.296766077 | 1.410986673  |
| ENSG00000198517 | MAFK          | v-maf avian musculoaponeurotic fibrosarcoma oncogene homolog K [Source:HGNC Symbol;Acc:6782]                                         | 1.094938062  | 4.668502982 | 9.356647426  | 0.002221782 | 0.020242352 | 4.245319886  | 3.974354883  | 4.812985108  | 5.255549576  | 4.694433395  |
| ENSG00000188603 | CLN3          | ceroid-lipofuscinosis, neuronal 3 [Source:HGNC Symbol;Acc:2074]                                                                      | 1.249304313  | 3.432705302 | 9.346016311  | 0.002234707 | 0.020347656 | 2.75119112   | 3.152996839  | 3.664462604  | 4.084864894  | 3.074840951  |
| ENSG00000167880 | EVPL          | envoplakin [Source:HGNC Symbol;Acc:3503]                                                                                             | -1.783892948 | 2.261538656 | 9.341571649  | 0.002240133 | 0.02038649  | 3.176070082  | 3.303012124  | 1.718398126  | -2.670141381 | 0.378903451  |
| ENSG00000138185 | ENTPD1        | ectonucleoside triphosphate diphosphohydrolase 1 [Source:HGNC Symbol;Acc:3363]                                                       | 1.201753921  | 6.266369526 | 9.326021474  | 0.002259223 | 0.020538927 | 5.451271999  | 5.55883994   | 6.049998008  | 7.15521396   | 6.408007209  |
| ENSG00000205959 | RP11-689P1.2  |                                                                                                                                      | 1.65759258   | 0.105173619 | 9.326645307  | 0.002258454 | 0.020538927 | -0.555769858 | 0.343933181  | 0.365283811  | 0.074465887  | -0.316136847 |
| ENSG00000166881 | TMEM194A      | transmembrane protein 194A [Source:HGNC Symbol;Acc:29001]                                                                            | -1.04683935  | 5.407157591 | 9.308846342  | 0.0022805   | 0.020699847 | 5.805312087  | 5.992777004  | 5.119928242  | 4.231969659  | 5.274935181  |
| ENSG00000178127 | NDUFV2        | NAADH dehydrogenase (ubiquinone) flavoprotein 2, 24kDa [Source:HGNC Symbol;Acc:7717]                                                 | 1.488246919  | 1.526697381 | 9.309810033  | 0.002279301 | 0.020699847 | 1.210071084  | 1.16603322   | 1.956663165  | 2.076676283  | 0.551948963  |
| ENSG00000233622 | CYP2T2P       | cytochrome P450, family 2, subfamily T, polypeptide 2, pseudogene [Source:HGNC Symbol;Acc:18852]                                     | 1.538082821  | 0.865546715 | 9.310095812  | 0.002278946 | 0.020699847 | 0.435934254  | 0.277241192  | 1.245796404  | 1.414416401  | 0.303422373  |
| ENSG00000243789 | JMJD7         | jumonji domain containing 7 [Source:HGNC Symbol;Acc:34397]                                                                           | 1.645583063  | 0.15028167  | 9.307930338  | 0.002281641 | 0.020699847 | -0.489407866 | 0.133828548  | 0.632982468  | 0.192266291  | -0.376928291 |
| ENSG00000233325 | MIPEPP3       | mitochondrial intermediate peptidase pseudogene 3 [Source:HGNC Symbol;Acc:39458]                                                     | 1.71255562   | 0.078668066 | 9.296078694  | 0.002296449 | 0.020823429 | -0.698419327 | -0.252938016 | -0.10933503  | 0.335717742  | 0.450630967  |
| ENSG00000271722 | RP11-446E9.2  |                                                                                                                                      | 1.917277527  | 0.049936679 | 9.29451825   | 0.002298406 | 0.020830415 | -0.365194284 | -0.855949929 | -0.390491059 | 0.798919003  | 0.095393329  |
| ENSG00000162711 | NLRP3         | NLR family, pyrin domain containing 3 [Source:HGNC Symbol;Acc:16400]                                                                 | 1.384412795  | 5.98422043  | 9.289335272  | 0.002304918 | 0.020878655 | 4.574904087  | 5.489646553  | 5.521542954  | 6.835796941  | 6.447988456  |
| ENSG00000224837 | GCSHP5        | glycine cleavage system protein H pseudogene 5 [Source:HGNC Symbol;Acc:44195]                                                        | -1.425759607 | 1.990980708 | 9.285958162  | 0.002309171 | 0.020906394 | 2.882290283  | 2.612158157  | 0.884581662  | 0.369457657  | 1.564363944  |
| ENSG00000173369 | C1QB          | complement component 1, q subcomponent, B chain [Source:HGNC Symbol;Acc:1242]                                                        | -1.482030449 | 2.934324075 | 9.283791403  | 0.002311904 | 0.020911176 | 4.052759582  | 2.84296036   | 1.829176068  | 1.65228493   | 2.906500707  |
| ENSG00000103528 | SYT17         | synaptotagmin XVII [Source:HGNC Symbol;Acc:24119]                                                                                    | 1.682023743  | 1.188850621 | 9.28365074   | 0.002312082 | 0.020911176 | 0.627538984  | 0.904001603  | 0.858697288  | 2.13668837   | 0.551948963  |
| ENSG00000137877 | SPTBN5        | spectrin, beta, non-erythrocytic 5 [Source:HGNC Symbol;Acc:15680]                                                                    | 1.269480205  | 2.681314122 | 9.28260674   | 0.0023134   | 0.020912324 | 2.386155691  | 2.353543875  | 3.242232575  | 3.266541267  | 1.239342106  |
| ENSG00000249476 | CTD-2587M2.1  |                                                                                                                                      | 1.524047656  | 0.964546101 | 9.276294385  | 0.002321386 | 0.020973715 | 0.534915169  | 0.689955027  | 1.120669604  | 1.348272594  | 0.763888603  |
| ENSG00000122121 | XPNPEP2       | X-prolyl aminopeptidase (aminopeptidase P) 2, membrane-bound [Source:HGNC Symbol;Acc:12823]                                          | 1.704046079  | 0.225020218 | 9.274052208  | 0.002324229 | 0.020988603 | 0.133035942  | -0.523165112 | 0.125863448  | 0.192266291  | 0.646616095  |
| ENSG00000181481 | RNF135        | ring finger protein 135 [Source:HGNC Symbol;Acc:21158]                                                                               | 1.154835574  | 5.114088624 | 9.270331329  | 0.002328956 | 0.021020472 | 4.377889068  | 4.595461025  | 4.947999288  | 5.770710897  | 5.40813974   |
| ENSG00000254750 | CASP1P2       | caspace 1, apoptosis-related cysteine peptidase pseudogene 2 [Source:HGNC Symbol;Acc:43776]                                          | 2.085591772  | 0.385152244 | 9.263478042  | 0.002337687 | 0.021088432 | -1.608074432 | 0.376157587  | 1.629349082  | 0.265774258  | -1.55968627  |
| ENSG00000230756 | RHOQP3        | ras homolog family member Q pseudogene 3 [Source:HGNC Symbol;Acc:37837]                                                              | 1.799545697  | 0.835888712 | 9.255514474  | 0.002347874 | 0.021169452 | 0.046214424  | 0.095631612  | 0.365283811  | 1.55300499   | 1.218946104  |
| ENSG00000236603 | RANP1         | RAN, member RAS oncogene family pseudogene 1 [Source:HGNC Symbol;Acc:21631]                                                          | -1.051329365 | 6.97917624  | 9.2485908    | 0.002356767 | 0.021235367 | 7.535428582  | 7.476047346  | 6.481694967  | 6.048366612  | 6.800024919  |
| ENSG00000127586 | CTF18         | CTF18, chromosome transmission fidelity factor 18 homolog (S. cerevisiae) [Source:HGNC Symbol;Acc:18435]                             | -1.01456989  | 4.934189845 | 9.233490542  | 0.002376282 | 0.021392632 | 5.408403051  | 5.40822756   | 4.658403207  | 4.038427289  | 4.698122044  |
| ENSG00000128309 | MPST          | mercaptopyruvate sulfurtransferase [Source:HGNC Symbol;Acc:7223]                                                                     | -1.108570373 | 5.075299236 | 9.229822605  | 0.002381047 | 0.021424543 | 5.62327883   | 5.458945245  | 3.939130343  | 4.631875924  | 5.124061664  |
| ENSG00000229644 | NAMPTL        | nicotinamide phosphoribosyltransferase-like [Source:HGNC Symbol;Acc:17633]                                                           | 1.99594391   | 6.849288132 | 9.22205154   | 0.002391175 | 0.021504646 | 5.532369944  | 5.886324968  | 5.642147491  | 8.333767185  | 6.617290475  |
| ENSG00000065534 | MYLK          | myosin light chain kinase [Source:HGNC Symbol;Acc:7590]                                                                              | 1.598909147  | 3.83588348  | 9.2117431802 | 0.002397216 | 0.021547938 | 2.103982592  | 3.332051848  | 3.371413639  | 4.871476853  | 4.096705135  |
| ENSG00000176853 | FAM91A1       | family with sequence similarity 91, member A1 [Source:HGNC Symbol;Acc:26306]                                                         | 1.082566689  | 5.38913238  | 9.211743907  | 0.002404675 | 0.021603927 | 4.760202192  | 5.007813394  | 5.444241255  | 5.997351335  | 5.411513848  |

|                 |                |                                                                                                             |              |             |             |             |             |              |              |              |              |              |
|-----------------|----------------|-------------------------------------------------------------------------------------------------------------|--------------|-------------|-------------|-------------|-------------|--------------|--------------|--------------|--------------|--------------|
| ENSG00000107833 | NPM3           | nucleophosmin/nucleoplasmin 3 [Source:HGNC Symbol;Acc:7931]                                                 | -1.282007192 | 3.623936617 | 9.207794028 | 0.002409869 | 0.021639515 | 4.453639214  | 4.043707322  | 3.133097051  | 2.116960417  | 3.300281982  |
| ENSG00000164068 | RNF123         | ring finger protein 123 [Source:HGNC Symbol;Acc:21148]                                                      | -1.010625221 | 6.137943218 | 9.203324014 | 0.002415761 | 0.021675115 | 6.503511903  | 6.755294011  | 5.386536308  | 5.739602708  | 5.852371578  |
| ENSG00000135540 | NHSL1          | NHS-like 1 [Source:HGNC Symbol;Acc:21021]                                                                   | 1.705479558  | 1.245028707 | 9.202913045 | 0.002416303 | 0.021675115 | 0.292419846  | 0.881727766  | 1.007464306  | 2.194303497  | 0.923655414  |
| ENSG00000131981 | LGALS3         | lectin, galactoside-binding, soluble, 3 [Source:HGNC Symbol;Acc:6563]                                       | 1.160349445  | 6.399426741 | 9.199067581 | 0.002421384 | 0.021698521 | 5.48053991   | 5.915397584  | 6.270935771  | 7.138493962  | 6.624577478  |
| ENSG00000196730 | DAPK1          | death-associated protein kinase 1 [Source:HGNC Symbol;Acc:2674]                                             | 1.299220428  | 6.19921079  | 9.19777703  | 0.002423092 | 0.021702745 | 4.884277045  | 5.448564552  | 5.652542018  | 7.102268031  | 6.730584323  |
| ENSG00000169245 | CXCL10         | chemokine (C-X-C motif) ligand 10 [Source:HGNC Symbol;Acc:10637]                                            | 1.896089357  | 0.396658557 | 9.195897832 | 0.002425581 | 0.021713958 | -0.625332215 | -0.112176905 | -0.010608983 | 1.27894994   | 0.378903451  |
| ENSG00000138780 | GSTCD          | glutathione S-transferase, C-terminal domain containing [Source:HGNC Symbol;Acc:25806]                      | -1.23258855  | 3.053604686 | 9.19447037  | 0.002427473 | 0.021714709 | 3.76402209   | 3.647994137  | 2.28288562   | 1.948600359  | 2.671550033  |
| ENSG00000160201 | UZAF1          | U2 small nuclear RNA auxiliary factor 1 [Source:HGNC Symbol;Acc:12453]                                      | 1.314902334  | 6.401249363 | 9.193968595 | 0.002428139 | 0.021714709 | 5.624215801  | 5.805066297  | 6.132649283  | 7.539994371  | 5.925782981  |
| ENSG00000254006 | RP11-1D12.2    |                                                                                                             | -1.988123885 | 1.274745976 | 9.192585616 | 0.002429974 | 0.021720057 | 1.819824215  | 0.98980953   | -2.845623393 | -2.205328685 | 2.586540774  |
| ENSG00000188167 | TMPPE          | transmembrane protein with metallophosphoesterase domain [Source:HGNC Symbol;Acc:33865]                     | 1.385198619  | 2.864598455 | 9.190927493 | 0.002432176 | 0.021728678 | 2.071376358  | 2.345428436  | 2.840873769  | 3.723209392  | 2.693890668  |
| ENSG00000270055 | CTD-3092A11.2  |                                                                                                             | 1.28281661   | 3.869473904 | 9.169998899 | 0.002460147 | 0.021967387 | 3.18625708   | 3.269091943  | 3.708603425  | 4.512376441  | 4.183471549  |
| ENSG00000261716 | RP11-196G18.22 |                                                                                                             | 1.244327412  | 3.038501108 | 9.166777722 | 0.002464481 | 0.021994899 | 2.217603867  | 2.632310473  | 3.523307974  | 3.174106579  | 3.240829074  |
| ENSG00000240710 | RP11-430C7.4   |                                                                                                             | 1.659794247  | 0.626190727 | 9.164067496 | 0.002468134 | 0.022016304 | -0.250832646 | 0.610915408  | 1.379231566  | 0.497040107  | 0.095393329  |
| ENSG00000223773 | CD99P1         | CD99 molecule pseudogene 1 [Source:HGNC Symbol;Acc:7083]                                                    | 1.392487488  | 2.623409692 | 9.158646064 | 0.002475457 | 0.022059208 | 2.114689606  | 1.986973075  | 2.657864658  | 3.26205752   | 2.664025609  |
| ENSG00000234506 | RP11-274B18.2  |                                                                                                             | 2.068137545  | 0.726687829 | 9.158758939 | 0.002475304 | 0.022059208 | 0.000762307  | -0.647226338 | -0.329705368 | 1.665926088  | 1.259453775  |
| ENSG00000261644 | RP11-327F2.2   |                                                                                                             | 1.488747912  | 2.181586796 | 9.154380008 | 0.002481234 | 0.02208827  | 1.268770164  | 1.673554946  | 2.171650019  | 3.007317163  | 2.087470534  |
| ENSG00000164845 | FAM86FP        | family with sequence similarity 86, member F, pseudogene [Source:HGNC Symbol;Acc:42357]                     | 1.644600453  | 0.226894171 | 9.154424865 | 0.002481173 | 0.02208827  | -0.489407866 | 0.207316148  | 0.471574783  | 0.466186565  | -0.095747566 |
| ENSG00000143179 | UCK2           | uridine-cytidine kinase 2 [Source:HGNC Symbol;Acc:12562]                                                    | -1.135311312 | 4.251445314 | 9.153416847 | 0.002482541 | 0.022088698 | 4.736135045  | 4.738665556  | 3.083673126  | 3.568398624  | 4.40953014   |
| ENSG00000007237 | GAS7           | growth arrest-specific 7 [Source:HGNC Symbol;Acc:4169]                                                      | 1.282955569  | 7.451086894 | 9.142811803 | 0.002496971 | 0.022205837 | 6.077782981  | 6.45599335   | 7.0188414    | 8.386986655  | 7.993631947  |
| ENSG00000196502 | SULT1A1        | sulfotransferase family, cytosolic, 1A, phenol-preferring, member 1 [Source:HGNC Symbol;Acc:11453]          | 1.075098157  | 5.409474626 | 9.140319894 | 0.002500374 | 0.022217238 | 4.646747126  | 5.309475856  | 5.763940308  | 6.093859817  | 4.636019409  |
| ENSG00000124357 | NAGK           | N-acetylglucosamine kinase [Source:HGNC Symbol;Acc:17174]                                                   | 1.176462191  | 7.27994503  | 9.140019821 | 0.002500784 | 0.022217238 | 6.264238088  | 6.749924085  | 7.355142903  | 8.138454021  | 7.197336102  |
| ENSG00000151151 | IPMK           | inositol polyphosphate multikinase [Source:HGNC Symbol;Acc:20739]                                           | 1.303491346  | 4.531499149 | 9.132064555 | 0.002511681 | 0.022288225 | 3.499792625  | 4.056192383  | 4.172404344  | 5.238533272  | 4.983021284  |
| ENSG00000198853 | RUSC2          | RUN and SH3 domain containing 2 [Source:HGNC Symbol;Acc:23625]                                              | 1.54982215   | 3.939015663 | 9.133195505 | 0.002510129 | 0.022288225 | 2.80506858   | 3.171477064  | 3.186096972  | 4.846237689  | 4.494710155  |
| ENSG00000090339 | ICAM1          | intercellular adhesion molecule 1 [Source:HGNC Symbol;Acc:5344]                                             | 1.595200045  | 5.830362037 | 9.131407757 | 0.002512583 | 0.022288225 | 4.633778887  | 4.932612871  | 4.849585219  | 6.966934515  | 6.227077216  |
| ENSG00000132763 | MMACHC         | methylmalonic aciduria (cobalamin deficiency) cblC type, with homocystinuria [Source:HGNC Symbol;Acc:24525] | -1.478536188 | 2.333899527 | 9.124894273 | 0.002521545 | 0.022354213 | 3.080997749  | 3.011429331  | 1.732719555  | 0.074465887  | 2.006486965  |
| ENSG00000228327 | RP11-206L10.2  |                                                                                                             | 1.680404601  | 0.2818553   | 9.124151289 | 0.002522569 | 0.022354213 | -0.094677427 | -0.112176905 | -0.10933503  | 0.74852395   | 0.415212929  |
| ENSG00000149564 | ESAM           | endothelial cell adhesion molecule [Source:HGNC Symbol;Acc:17474]                                           | 1.487349241  | 3.49335888  | 9.102193808 | 0.002553031 | 0.022612744 | 2.003866175  | 3.180629157  | 3.434103115  | 4.292580805  | 3.647960442  |
| ENSG00000165097 | KDM1B          | lysine (K)-specific demethylase 1B [Source:HGNC Symbol;Acc:21577]                                           | 1.098666045  | 6.168504713 | 9.099155191 | 0.002557276 | 0.022638919 | 5.282302799  | 5.739229248  | 6.125883162  | 6.831264034  | 6.380723913  |
| ENSG00000197353 | LYPD2          | LY6/PLAUR domain containing 2 [Source:HGNC Symbol;Acc:25215]                                                | 1.826636812  | 1.260230892 | 9.093102418 | 0.002565753 | 0.022702515 | -0.306880589 | 1.184348258  | 1.613958159  | 2.267710332  | -0.506781561 |
| ENSG00000006717 | PHKA1          | phosphorylase kinase, alpha 1 (muscle) [Source:HGNC Symbol;Acc:8925]                                        | -1.912446419 | 0.672409077 | 9.088230301 | 0.002572597 | 0.022718378 | 1.531025871  | 1.434365866  | -3.233942493 | -2.0191864   | 0.791775511  |
| ENSG00000146072 | TNFRSF21       | tumor necrosis factor receptor superfamily, member 21 [Source:HGNC Symbol;Acc:13469]                        | -1.445573115 | 2.412642454 | 9.087497806 | 0.002573627 | 0.022718378 | 2.764850286  | 2.492318033  | -0.215316613 | 0.669468625  | 3.524590078  |
| ENSG00000213513 | RP13-39P12.2   |                                                                                                             | 1.303412354  | 3.338443766 | 9.087221559 | 0.002574016 | 0.022718378 | 2.702339162  | 2.871498754  | 3.222071445  | 4.017298632  | 3.45217082   |
| ENSG00000229980 | TOB1-AS1       | TOB1 antisense RNA 1 [Source:HGNC Symbol;Acc:44340]                                                         | 1.66706249   | 0.153854652 | 9.090869576 | 0.002568887 | 0.022718378 | 0.000762307  | -0.30308518  | 0.538319988  | -0.296766077 | 0.303422373  |
| ENSG00000272993 | RP11-196G18.24 |                                                                                                             | 1.773426084  | 0.430857773 | 9.08740352  | 0.00257376  | 0.022718378 | 0.174562846  | -0.932821174 | 0.934997507  | 0.61425099   | 0.485200289  |
| ENSG00000173599 | PC             | pyruvate carboxylase [Source:HGNC Symbol;Acc:8636]                                                          | -1.190654456 | 3.577197495 | 9.079418355 | 0.002585023 | 0.022792602 | 4.069366531  | 4.327378419  | 3.066814926  | 2.27662903   | 3.215315242  |
| ENSG00000101751 | POLI           | polymerase (DNA directed) iota [Source:HGNC Symbol;Acc:9182]                                                | 1.003392728  | 4.864836606 | 9.079845757 | 0.002584418 | 0.022792602 | 4.281404562  | 4.627606002  | 5.205848971  | 5.22592584   | 4.750573979  |

|                 |                |                                                                                                                   |              |              |             |             |             |              |              |              |              |              |
|-----------------|----------------|-------------------------------------------------------------------------------------------------------------------|--------------|--------------|-------------|-------------|-------------|--------------|--------------|--------------|--------------|--------------|
| ENSG00000179593 | ALOX15B        | arachidonate 15-lipoxygenase, type B [Source:HGNC Symbol;Acc:434]                                                 | 1.843387948  | 0.217545525  | 9.074901966 | 0.002591415 | 0.022837492 | -0.775407551 | 0.207316148  | -0.453950945 | 1.006157955  | 0.04992943   |
| ENSG00000214193 | SH3D21         | SH3 domain containing 21 [Source:HGNC Symbol;Acc:26236]                                                           | 1.618888273  | 1.124373141  | 9.069349909 | 0.002599295 | 0.02288396  | 0.566455146  | 0.715367718  | 0.75024962   | 1.732261721  | 1.318159404  |
| ENSG00000260136 | CTD-2270L9.4   |                                                                                                                   | 1.770597151  | -0.032192441 | 9.041848461 | 0.002638687 | 0.023207491 | -0.555769858 | -0.932821174 | -0.66302287  | 0.335717742  | 0.615745481  |
| ENSG00000198924 | DCLRE1A        | DNA cross-link repair 1A [Source:HGNC Symbol;Acc:17660]                                                           | -1.059384532 | 4.223212762  | 9.030125178 | 0.002655663 | 0.023333415 | 4.775464577  | 4.723090122  | 3.523307974  | 3.253048002  | 4.191344602  |
| ENSG00000133246 | PRAM1          | PML-RARA regulated adaptor molecule 1 [Source:HGNC Symbol;Acc:30091]                                              | 1.245465611  | 7.01126196   | 9.030378336 | 0.002655295 | 0.023333415 | 5.819289062  | 6.390947726  | 6.75158165   | 7.876833484  | 7.335780113  |
| ENSG00000186642 | PDE2A          | phosphodiesterase 2A, cGMP-stimulated [Source:HGNC Symbol;Acc:8777]                                               | 1.609617428  | 0.238142965  | 9.025442389 | 0.002662475 | 0.023381563 | -0.250832646 | 0.376157587  | -0.10933503  | 0.527247606  | 0.139468177  |
| ENSG00000162881 | OXER1          | oxoecoisanol (OXE) receptor 1 [Source:HGNC Symbol;Acc:24884]                                                      | 1.669821813  | 2.007231441  | 9.023441746 | 0.00266539  | 0.023395465 | 0.742455703  | 1.565913615  | 1.703933103  | 2.842914522  | 2.247064062  |
| ENSG00000244480 | AC005154.7     |                                                                                                                   | 1.48466496   | 1.3209449    | 9.022468316 | 0.00266681  | 0.023396229 | 0.597320328  | 1.09035546   | 1.829176068  | 1.745170531  | 0.735452007  |
| ENSG00000225241 | RP11-640M9.2   |                                                                                                                   | 1.030122225  | 5.259730361  | 9.018082945 | 0.002673216 | 0.023429011 | 4.59607123   | 5.313641668  | 5.988667006  | 5.655776828  | 3.743871718  |
| ENSG00000173166 | RAPH1          | Ras association (RalGDS/AF-6) and pleckstrin homology domains 1 [Source:HGNC Symbol;Acc:14436]                    | 1.408462799  | 2.324057669  | 9.018172604 | 0.002673085 | 0.023429011 | 1.431768352  | 2.048255313  | 2.490973667  | 3.001949214  | 2.098677261  |
| ENSG00000176463 | SLCO3A1        | solute carrier organic anion transporter family, member 3A1 [Source:HGNC Symbol;Acc:10952]                        | 1.040758052  | 5.766051025  | 9.013128578 | 0.002680472 | 0.023480881 | 4.641203577  | 5.34348935   | 5.814469071  | 6.362951298  | 6.08075335   |
| ENSG00000262370 | RP11-473M20.9  |                                                                                                                   | 1.297466999  | 3.469414404  | 9.010817965 | 0.002683863 | 0.023498859 | 2.863368893  | 2.899483554  | 3.447189363  | 4.268193945  | 3.348020491  |
| ENSG00000199804 | RNASP383       | RNA, 5S ribosomal pseudogene 383 [Source:HGNC Symbol;Acc:43283]                                                   | 1.609604165  | 0.34516138   | 9.006055777 | 0.002690865 | 0.023536689 | -0.306880589 | -0.355038393 | 0.832340008  | 0.74852395   | 0.04992943   |
| ENSG00000188312 | CENPP          | centromere protein P [Source:HGNC Symbol;Acc:32933]                                                               | -1.318154362 | 2.816965598  | 8.999117667 | 0.0027011   | 0.023614446 | 3.462559037  | 3.480241792  | 2.28288562   | 1.148991974  | 2.504656975  |
| ENSG00000051128 | HOMER3         | homer homolog 3 (Drosophila) [Source:HGNC Symbol;Acc:17514]                                                       | 1.449334915  | 3.423475603  | 8.993186002 | 0.002709881 | 0.023679426 | 2.285510849  | 2.772072928  | 2.905510557  | 4.161495642  | 4.025090588  |
| ENSG00000175489 | LRRC25         | leucine rich repeat containing 25 [Source:HGNC Symbol;Acc:29806]                                                  | 1.263758314  | 7.179222535  | 8.992049322 | 0.002711567 | 0.023682371 | 5.657547772  | 6.654206185  | 7.211703874  | 7.976158226  | 7.435824091  |
| ENSG00000259448 | RP11-16E12.1   |                                                                                                                   | 1.488021952  | 0.921657489  | 8.982794702 | 0.002725335 | 0.023790779 | 0.254194054  | 0.468724906  | 1.304500245  | 1.0274492    | 1.090116303  |
| ENSG00000112578 | BYSL           | bystin-like [Source:HGNC Symbol;Acc:1157]                                                                         | -1.228576107 | 3.45675592   | 8.976485635 | 0.002734761 | 0.0238612   | 4.185638714  | 3.984842068  | 2.28288562   | 2.775303064  | 3.146787158  |
| ENSG00000126814 | TRMT5          | tRNA methyltransferase 5 [Source:HGNC Symbol;Acc:23141]                                                           | -1.214255405 | 3.462889559  | 8.969439424 | 0.002745328 | 0.023918623 | 4.104705577  | 4.051211317  | 3.009154251  | 1.959718487  | 3.189342067  |
| ENSG00000197872 | FAM49A         | family with sequence similarity 49, member A [Source:HGNC Symbol;Acc:25373]                                       | 1.155894818  | 6.136921328  | 8.969371611 | 0.00274543  | 0.023918623 | 5.311680775  | 5.375723561  | 5.871400925  | 6.899250526  | 6.53047388   |
| ENSG00000239653 | PSMD6-AS2      | PSMD6 antisense RNA 2 [Source:HGNC Symbol;Acc:44125]                                                              | 1.295835129  | 2.587144256  | 8.970585444 | 0.002743607 | 0.023918623 | 1.871242652  | 2.416874535  | 3.227138203  | 2.996561217  | 1.774613685  |
| ENSG00000180304 | OA22           | ornithine decarboxylase antizyme 2 [Source:HGNC Symbol;Acc:8096]                                                  | 1.174264041  | 6.370831791  | 8.965010317 | 0.002751991 | 0.023952013 | 5.45338237   | 5.805066297  | 6.144079358  | 7.198093666  | 6.588265736  |
| ENSG00000154608 | CEP170P1       | centrosomal protein 170kDa pseudogene 1 [Source:HGNC Symbol;Acc:28364]                                            | 1.79416759   | 0.257174145  | 8.965914379 | 0.00275063  | 0.023952013 | 0.254194054  | -0.583862591 | 0.471574783  | 0.642123966  | -0.147769603 |
| ENSG00000188897 | CTD-3088G3.8   | Protein LOC388210 [Source:UniProtKB/TrEMBL;Acc:i3L099]                                                            | 1.583539554  | 4.329515705  | 8.962971318 | 0.002755065 | 0.023966877 | 2.907138859  | 2.217877931  | 2.827591492  | 4.688107788  | 5.788927056  |
| ENSG00000272825 | L21NC02-1C16.2 |                                                                                                                   | 1.694179975  | 1.39607848   | 8.96025128  | 0.002759169 | 0.023990698 | -0.14487434  | 1.010487126  | 1.265630948  | 1.719236363  | 2.098677261  |
| ENSG00000270640 | RP11-373D23.2  |                                                                                                                   | 2.123292874  | 0.289714207  | 8.959138122 | 0.002760851 | 0.023993436 | 0.046214424  | -1.289265519 | -0.390491059 | 1.261086007  | 0.303422373  |
| ENSG00000271288 | IGHV1OR15-3    | immunoglobulin heavy variable 1/OR15-3 (pseudogene) [Source:HGNC Symbol;Acc:5565]                                 | -1.916356516 | 0.395751655  | 8.950742751 | 0.002773568 | 0.024092026 | 1.546924617  | 0.740340508  | -2.845623393 | -1.572251189 | 0.303422373  |
| ENSG00000076356 | PLXNA2         | plexin A2 [Source:HGNC Symbol;Acc:9100]                                                                           | 1.363250294  | 2.772284264  | 8.946488126 | 0.002780035 | 0.024126601 | 1.992300831  | 2.048255313  | 2.604351095  | 3.535338275  | 3.016948344  |
| ENSG00000144802 | NFKBIZ         | nuclear factor of kappa light polypeptide gene enhancer in B-cells inhibitor, zeta [Source:HGNC Symbol;Acc:29805] | 1.493267424  | 7.79111781   | 8.943746266 | 0.002784211 | 0.02414863  | 7.070843133  | 6.756059515  | 7.535979298  | 8.901073491  | 7.650929943  |
| ENSG00000253729 | PRKDC          | protein kinase, DNA-activated, catalytic polypeptide [Source:HGNC Symbol;Acc:9413]                                | -1.157875194 | 7.475180134  | 8.940095166 | 0.002789782 | 0.024184998 | 7.630820357  | 8.154531063  | 7.207544162  | 6.544677003  | 7.366818121  |
| ENSG00000160111 | CPAMD8         | C3 and P2P-like, alpha-2-macroglobulin domain containing 8 [Source:HGNC Symbol;Acc:23228]                         | 1.351443714  | 3.219645943  | 8.93331443  | 0.002800158 | 0.024262964 | 1.682639457  | 2.882757898  | 3.712221583  | 3.243981866  | 3.718670245  |
| ENSG00000175048 | ZDHC14         | zinc finger, DHHC-type containing 14 [Source:HGNC Symbol;Acc:20341]                                               | -1.13112288  | 3.632355805  | 8.926757238 | 0.002810228 | 0.024328475 | 4.167756273  | 4.161637805  | 2.873554121  | 2.913229148  | 3.456532906  |
| ENSG00000143224 | PPOX           | protoporphyrinogen oxidase [Source:HGNC Symbol;Acc:9280]                                                          | -1.049962636 | 5.516347002  | 8.926587486 | 0.00281049  | 0.024328475 | 5.994726982  | 6.155955215  | 5.406773353  | 4.45852833   | 4.861640106  |
| ENSG00000092964 | DPYSL2         | dihydropyrimidinase-like 2 [Source:HGNC Symbol;Acc:3014]                                                          | 1.11507959   | 5.843032792  | 8.9254171   | 0.002812291 | 0.024332071 | 4.543550295  | 5.375723561  | 5.705236819  | 6.380638865  | 6.433125028  |
| ENSG00000244617 | ASPRV1         | aspartic peptidase, retroviral-like 1 [Source:HGNC Symbol;Acc:26321]                                              | 1.624951983  | 1.204494603  | 8.924107012 | 0.002814309 | 0.024337537 | 0.502670228  | 0.498306264  | 1.030832979  | 2.003353492  | 1.239342106  |

|                 |              |                                                                                                           |              |              |             |             |             |             |              |              |              |              |
|-----------------|--------------|-----------------------------------------------------------------------------------------------------------|--------------|--------------|-------------|-------------|-------------|-------------|--------------|--------------|--------------|--------------|
| ENSG00000082781 | ITGB5        | integrin, beta 5 [Source:HGNC Symbol;Acc:6160]                                                            | 1.408412359  | 4.071160304  | 8.918946268 | 0.002822273 | 0.024394389 | 2.863368893 | 3.534789485  | 3.63044747   | 5.00358354   | 4.352157627  |
| ENSG00000133812 | SBF2         | SET binding factor 2 [Source:HGNC Symbol;Acc:2135]                                                        | 1.048768013  | 4.954318698  | 8.915682221 | 0.002827322 | 0.024413986 | 3.903304094 | 4.559078681  | 5.044438545  | 5.439532733  | 5.315123071  |
| ENSG00000131781 | FMO5         | flavin containing monooxygenase 5 [Source:HGNC Symbol;Acc:3773]                                           | 1.323320524  | 3.418748665  | 8.915875224 | 0.002827023 | 0.024413986 | 2.606977165 | 2.813846027  | 3.196467253  | 4.019956698  | 3.876749164  |
| ENSG00000152926 | ZNF117       | zinc finger protein 117 [Source:HGNC Symbol;Acc:12897]                                                    | 1.196001365  | 4.701606078  | 8.900751533 | 0.002850533 | 0.024602315 | 4.044383867 | 4.16855421   | 4.437959236  | 5.309777588  | 5.087965869  |
| ENSG00000248930 | CTC-250P20.1 |                                                                                                           | 1.205320467  | 3.836460425  | 8.892494442 | 0.002863453 | 0.024696293 | 3.196372651 | 3.494990685  | 3.761945509  | 4.261470811  | 4.167595364  |
| ENSG00000267519 | MIR24-2      | microRNA 24-2 [Source:HGNC Symbol;Acc:31608]                                                              | 1.576660604  | 4.643368995  | 8.891995384 | 0.002864235 | 0.024696293 | 4.136575339 | 3.180629157  | 3.966655493  | 5.719302866  | 4.892553786  |
| ENSG00000254294 | IMPDH1P6     | IMP (inosine monophosphate) dehydrogenase 1 pseudogene 6 [Source:HGNC Symbol;Acc:33961]                   | 1.50704261   | 2.299736125  | 8.889983625 | 0.002867393 | 0.024699257 | 1.696960037 | 1.537699846  | 2.039642018  | 3.04955654   | 2.537970241  |
| ENSG00000182389 | CACNB4       | calcium channel, voltage-dependent, beta 4 subunit [Source:HGNC Symbol;Acc:1404]                          | 1.533279846  | 1.618493931  | 8.890030101 | 0.00286732  | 0.024699257 | 0.502670228 | 1.371815184  | 1.932051102  | 2.258736156  | 1.298855074  |
| ENSG00000132334 | PTPRE        | protein tyrosine phosphatase, receptor type, E [Source:HGNC Symbol;Acc:9669]                              | 1.264724696  | 7.317037746  | 8.888854132 | 0.002869167 | 0.02470242  | 6.01558652  | 6.511448068  | 6.935782687  | 8.28680977   | 7.688964309  |
| ENSG00000224080 | UBE2FP1      | ubiquitin-conjugating enzyme E2F (putative) pseudogene 1 [Source:HGNC Symbol;Acc:44535]                   | 1.868294691  | 0.872143358  | 8.882461419 | 0.002879231 | 0.024776912 | 0.254194054 | 0.277241192  | 0.28980717   | 1.808036846  | 0.791775511  |
| ENSG00000234025 | RP11-257K9.3 |                                                                                                           | -1.880963596 | -0.028127266 | 8.874669727 | 0.002891545 | 0.024858512 | 0.823008709 | 0.947543428  | -2.539967122 | -2.419096061 | -0.894110176 |
| ENSG00000062716 | VMP1         | vacuole membrane protein 1 [Source:HGNC Symbol;Acc:29559]                                                 | 1.279629855  | 7.203109623  | 8.874943613 | 0.002891112 | 0.024858512 | 6.143303116 | 6.406633226  | 6.854213162  | 8.137689377  | 7.520551463  |
| ENSG00000204622 | HLA-J        | major histocompatibility complex, class I, J (pseudogene) [Source:HGNC Symbol;Acc:4967]                   | 1.658312868  | 1.473073179  | 8.872091525 | 0.002895632 | 0.024881458 | 0.534915169 | 0.664086661  | 1.007464306  | 2.285492931  | 1.882291923  |
| ENSG00000108001 | EBF3         | early B-cell factor 3 [Source:HGNC Symbol;Acc:19087]                                                      | -2.859278057 | -0.612720413 | 8.866709193 | 0.002904182 | 0.024942718 | 0.566455146 | 0.376157587  | -7.002070102 | -3.888428289 | -3.221241555 |
| ENSG00000226950 | DANCR        | differentiation antagonizing non-protein coding RNA [Source:HGNC Symbol;Acc:28964]                        | -1.078902767 | 4.951431711  | 8.863627498 | 0.002909089 | 0.024972644 | 5.612931785 | 5.415029199  | 4.792623003  | 3.871861288  | 4.354496872  |
| ENSG00000185883 | ATP6VOC      | ATPase, H+ transporting, lysosomal 16kDa, V0 subunit c [Source:HGNC Symbol;Acc:855]                       | 2.26545957   | 1.198873668  | 8.857286123 | 0.002919213 | 0.025047302 | 0.714573228 | -0.355038393 | -0.271377577 | 2.724061344  | 0.378903451  |
| ENSG00000124507 | PACSN1       | protein kinase C and casein kinase substrate in neurons 1 [Source:HGNC Symbol;Acc:8570]                   | 1.449654489  | 1.767287174  | 8.853991144 | 0.002924487 | 0.025080299 | 0.534915169 | 0.689955027  | 1.030832979  | 1.089500161  | 3.260920169  |
| ENSG00000213081 | AC012362.3   |                                                                                                           | 1.331867613  | 2.689460253  | 8.851310415 | 0.002928785 | 0.025104897 | 1.968888231 | 2.409108576  | 2.709464044  | 3.145180481  | 2.880764656  |
| ENSG00000069399 | BCL3         | B-cell CLL/lymphoma 3 [Source:HGNC Symbol;Acc:998]                                                        | 1.474623777  | 5.452260594  | 8.849125167 | 0.002932294 | 0.025122705 | 4.391160537 | 4.48344012   | 4.535127562  | 6.402193005  | 6.077216872  |
| ENSG00000039560 | RAI14        | retinoic acid induced 14 [Source:HGNC Symbol;Acc:14873]                                                   | -1.733855957 | 0.750969352  | 8.847881228 | 0.002934293 | 0.025127569 | 2.093195522 | 1.418980604  | -1.315629595 | -1.449512048 | -1.3021922   |
| ENSG00000123352 | SPATS2       | spermatogenesis associated, serine-rich 2 [Source:HGNC Symbol;Acc:18650]                                  | -1.165998363 | 3.829822053  | 8.84406686  | 0.002940432 | 0.025167861 | 4.626315788 | 4.1936344    | 3.196467253  | 2.895969157  | 3.486703703  |
| ENSG00000100106 | TRIOBP       | TRIO and F-actin binding protein [Source:HGNC Symbol;Acc:17009]                                           | 1.266212267  | 4.130773534  | 8.842252085 | 0.002943357 | 0.025180622 | 3.331012571 | 3.731322633  | 3.996635421  | 5.020937291  | 3.955910067  |
| ENSG00000259366 | CTD-2647L4.4 |                                                                                                           | 1.377441832  | 2.036588052  | 8.840294753 | 0.002946516 | 0.025184402 | 1.448792784 | 1.773719635  | 2.37706662   | 2.258736156  | 2.041752268  |
| ENSG00000255398 | HCAR3        | hydroxycarboxylic acid receptor 3 [Source:HGNC Symbol;Acc:16824]                                          | 1.915843904  | 3.533865531  | 8.840200144 | 0.002946668 | 0.025184402 | 3.070036784 | 1.773719635  | 2.672796614  | 4.889030573  | 3.290541751  |
| ENSG00000268758 | EMR4P        | egf-like module containing, mucin-like, hormone receptor-like 4 pseudogene [Source:HGNC Symbol;Acc:19240] | 1.347158935  | 2.881909937  | 8.835144647 | 0.002954842 | 0.025241973 | 2.026722384 | 2.871498754  | 3.936039322  | 2.866735547  | 1.374569317  |
| ENSG00000164124 | TMEM144      | transmembrane protein 144 [Source:HGNC Symbol;Acc:25633]                                                  | 1.780531474  | 3.066405833  | 8.819466281 | 0.002980338 | 0.025447392 | 2.156740297 | 2.244306154  | 2.085000104  | 4.183001653  | 3.319567355  |
| ENSG00000006740 | ARHGAP44     | Rho GTPase activating protein 44 [Source:HGNC Symbol;Acc:29096]                                           | 2.230193086  | 0.350610315  | 8.817502724 | 0.002983547 | 0.025462406 | 0.133035942 | -0.583862591 | -1.886652327 | 1.914722448  | -2.060109799 |
| ENSG00000180879 | SSR4         | signal sequence receptor, delta [Source:HGNC Symbol;Acc:11326]                                            | -1.079936051 | 6.976525552  | 8.815405706 | 0.002986978 | 0.025479299 | 7.628954373 | 7.163685965  | 6.555053148  | 6.414366601  | 6.764843282  |
| ENSG00000167210 | LOXHD1       | lipoxigenase homology domains 1 [Source:HGNC Symbol;Acc:26521]                                            | 1.575910931  | 2.306818982  | 8.802395914 | 0.003008352 | 0.025649161 | 1.57820595  | 1.912023327  | 2.1289755    | 3.579252501  | 0.415212929  |
| ENSG00000131480 | AOC2         | amine oxidase, copper containing 2 (retina-specific) [Source:HGNC Symbol;Acc:549]                         | 1.671229379  | 0.96439663   | 8.798432563 | 0.003014895 | 0.025692463 | 0.329658892 | 0.056395802  | 0.471574783  | 1.638513559  | 1.428856327  |
| ENSG00000164932 | CTHRC1       | collagen triple helix repeat containing 1 [Source:HGNC Symbol;Acc:18831]                                  | -3.344563522 | -0.55589229  | 8.791111435 | 0.003027018 | 0.025770755 | 0.566455146 | 0.376157587  | -4.621297774 | -7.002070102 | -1.87334355  |
| ENSG00000120254 | MTHFD1L      | methylenetetrahydrofolate dehydrogenase (NADP+ dependent) 1-like [Source:HGNC Symbol;Acc:21055]           | -1.233260978 | 2.886402604  | 8.781117005 | 0.003043648 | 0.025899774 | 3.598444871 | 3.364539756  | 2.171650019  | 1.692827451  | 2.708594515  |

|                 |               |                                                                                            |              |              |             |             |             |              |              |              |              |              |
|-----------------|---------------|--------------------------------------------------------------------------------------------|--------------|--------------|-------------|-------------|-------------|--------------|--------------|--------------|--------------|--------------|
| ENSG00000198910 | L1CAM         | L1 cell adhesion molecule [Source:HGNC Symbol;Acc:6470]                                    | 1.606705342  | 0.887485552  | 8.770396798 | 0.003061588 | 0.026039818 | 0.823008709  | 0.527293245  | 0.632982468  | 1.567613022  | 0.303422373  |
| ENSG00000105514 | RAB3D         | RAB3D, member RAS oncogene family [Source:HGNC Symbol;Acc:9779]                            | 1.122829586  | 5.714495805  | 8.767198818 | 0.003066961 | 0.026065693 | 4.497250847  | 5.242226174  | 5.489220774  | 6.174208769  | 6.40462488   |
| ENSG00000119900 | OGFRL1        | opioid growth factor receptor-like 1 [Source:HGNC Symbol;Acc:21378]                        | 1.210142894  | 7.631382632  | 8.766280404 | 0.003068506 | 0.026065693 | 6.217818539  | 7.197329557  | 7.861107208  | 8.108172302  | 8.03067253   |
| ENSG00000105499 | PLA2G4C       | phospholipase A2, group IVC (cytosolic, calcium-independent) [Source:HGNC Symbol;Acc:9037] | 1.698488735  | 1.081129042  | 8.765936202 | 0.003069085 | 0.026065693 | 0.92386066   | 0.343933181  | 0.9100098    | 1.86827773   | 0.676839958  |
| ENSG00000102837 | OLFM4         | olfactomedin 4 [Source:HGNC Symbol;Acc:17190]                                              | -3.242999553 | 1.910945517  | 8.760752992 | 0.003077819 | 0.026127235 | 3.33559629   | -1.191564836 | -3.766908349 | -2.419096061 | 2.968901188  |
| ENSG00000175556 | LONRF3        | LON peptidase N-terminal domain and ring finger 3 [Source:HGNC Symbol;Acc:21152]           | 1.30932808   | 2.363933198  | 8.759198706 | 0.003080444 | 0.026136872 | 1.79341104   | 1.965953212  | 2.635172888  | 2.860817063  | 2.206202022  |
| ENSG00000120694 | HSPH1         | heat shock 105kDa/110kDa protein 1 [Source:HGNC Symbol;Acc:16969]                          | -1.044403137 | 6.240698698  | 8.756703448 | 0.003084661 | 0.026160013 | 6.579389111  | 6.906712288  | 6.072693092  | 5.073060563  | 5.935971906  |
| ENSG00000142207 | URB1          | URB1 ribosome biogenesis 1 homolog (S. cerevisiae) [Source:HGNC Symbol;Acc:17344]          | -1.070048976 | 5.155850522  | 8.74748445  | 0.003100294 | 0.026279897 | 5.710562827  | 5.746951348  | 4.973850979  | 4.041046746  | 4.585134766  |
| ENSG00000136295 | TTYH3         | tweety family member 3 [Source:HGNC Symbol;Acc:22222]                                      | 1.189037393  | 7.314239862  | 8.74522676  | 0.003104135 | 0.026299754 | 6.161489323  | 6.809397582  | 7.244556723  | 8.08249574   | 7.562384767  |
| ENSG00000206344 | HCG27         | HLA complex group 27 (non-protein coding) [Source:HGNC Symbol;Acc:27366]                   | 1.204018083  | 2.817410756  | 8.742094327 | 0.003109472 | 0.026332261 | 2.256798335  | 2.345428436  | 3.329625449  | 3.174106579  | 2.594479232  |
| ENSG00000213731 | RAB5CP1       | RAB5C, member RAS oncogene family pseudogene 1 [Source:HGNC Symbol;Acc:45104]              | 1.509449717  | 0.73005783   | 8.733410117 | 0.003124316 | 0.026432468 | 0.292419846  | 0.171040209  | 0.9100098    | 1.048430793  | 0.791775511  |
| ENSG00000239264 | TXNDC5        | thioredoxin domain containing 5 (endoplasmic reticulum) [Source:HGNC Symbol;Acc:21073]     | -1.446001883 | 1.922290978  | 8.732005737 | 0.003126724 | 0.026440092 | 2.900966723  | 2.46261236   | 0.602113338  | 0.58582888   | 1.410986673  |
| ENSG00000080200 | CRYBG3        | beta-gamma crystallin domain containing 3 [Source:HGNC Symbol;Acc:34427]                   | 1.220990807  | 3.72358438   | 8.729544307 | 0.003130947 | 0.026463063 | 2.659107731  | 3.538353702  | 3.948363866  | 4.122452783  | 3.905749982  |
| ENSG00000175792 | RUVBL1        | RuvB-like AAA ATPase 1 [Source:HGNC Symbol;Acc:10474]                                      | -1.00560695  | 5.109033061  | 8.722603199 | 0.00314289  | 0.026551216 | 5.612931785  | 5.54029573   | 4.761530635  | 4.142106283  | 5.001050786  |
| ENSG00000272086 | CTD-2186M15.3 |                                                                                            | 1.561331509  | 1.081208128  | 8.716653244 | 0.003153163 | 0.026625197 | 0.796654307  | 0.095631612  | 1.205290011  | 1.477660161  | 1.279288931  |
| ENSG00000272098 | AC092299.8    |                                                                                            | 1.963871718  | -0.170251123 | 8.712042804 | 0.003161148 | 0.026679783 | -0.625332215 | -1.507080648 | -0.82139248  | 0.497040107  | 0.264147325  |
| ENSG00000154874 | CCDC144B      | coiled-coil domain containing 144B (pseudogene) [Source:HGNC Symbol;Acc:26704]             | 1.357917603  | 2.804672224  | 8.695620992 | 0.003189754 | 0.026908283 | 1.992300831  | 2.584842899  | 2.840873769  | 3.539049283  | 2.554342782  |
| ENSG00000188483 | IER5L         | immediate early response 5-like [Source:HGNC Symbol;Acc:23679]                             | 1.386379963  | 2.308230324  | 8.693244151 | 0.003193916 | 0.026930453 | 1.361587606  | 1.508923295  | 2.985428851  | 1.891686981  | 2.906500707  |
| ENSG00000128298 | BAIAP2L2      | BAI1-associated protein 2-like 2 [Source:HGNC Symbol;Acc:26203]                            | 1.66796886   | 0.231588412  | 8.689816588 | 0.003199928 | 0.02696819  | -0.094677427 | 0.171040209  | 1.030832979  | -0.797916568 | -0.095747566 |
| ENSG00000172594 | SMPDL3A       | sphingomyelin phosphodiesterase, acid-like 3A [Source:HGNC Symbol;Acc:17389]               | 1.398363664  | 3.290776736  | 8.688708626 | 0.003201874 | 0.026971638 | 2.114689606  | 2.766005365  | 2.924350076  | 3.758653379  | 4.036790502  |
| ENSG00000182782 | HCAR2         | hydroxycarboxylic acid receptor 2 [Source:HGNC Symbol;Acc:24827]                           | 2.138918883  | 2.911418455  | 8.687834375 | 0.00320341  | 0.026971638 | 2.247099092  | 1.050973916  | 1.501363361  | 4.333756326  | 2.906500707  |
| ENSG00000184220 | CMSS1         | cms1 ribosomal small subunit homolog (yeast) [Source:HGNC Symbol;Acc:28666]                | -1.214601118 | 3.272078753  | 8.682107278 | 0.003213492 | 0.027032456 | 3.998873122  | 3.765177832  | 2.780116222  | 2.035234912  | 2.900109607  |
| ENSG00000167173 | C15orf39      | chromosome 15 open reading frame 39 [Source:HGNC Symbol;Acc:24497]                         | 1.200429969  | 7.298503149  | 8.681981855 | 0.003213713 | 0.027032456 | 6.332328853  | 6.727071469  | 7.206582523  | 8.222781393  | 7.265423867  |
| ENSG00000177045 | SIX5          | SIX homeobox 5 [Source:HGNC Symbol;Acc:10891]                                              | -1.541137235 | 1.235392165  | 8.676652763 | 0.003223124 | 0.027098633 | 2.217603867  | 1.660530868  | 0.401591237  | -0.525689211 | 0.735452007  |
| ENSG00000168614 | NBPF9         | neuroblastoma breakpoint family, member 9 [Source:HGNC Symbol;Acc:31991]                   | 1.046577584  | 4.657170527  | 8.675608199 | 0.003224972 | 0.027101119 | 3.918660435  | 4.562583466  | 5.030014902  | 5.11219935   | 4.311798918  |
| ENSG00000049768 | FOXP3         | forkhead box P3 [Source:HGNC Symbol;Acc:6106]                                              | 1.454329365  | 1.800606237  | 8.674716577 | 0.00322655  | 0.027101479 | 0.848890306  | 1.508923295  | 2.456873398  | 1.79568083   | 1.829457167  |
| ENSG00000171954 | CYP4F22       | cytochrome P450, family 4, subfamily F, polypeptide 22 [Source:HGNC Symbol;Acc:26820]      | 1.496803725  | 1.707450806  | 8.672045158 | 0.003231284 | 0.027128256 | 1.084982398  | 1.508923295  | 1.774850102  | 2.521378548  | 0.923655414  |
| ENSG00000176812 | RP11-629O4.1  |                                                                                            | -1.50041013  | 1.229084553  | 8.670942119 | 0.00323324  | 0.027131705 | 2.146341971  | 1.867379203  | -0.10933503  | -0.525689211 | 0.791775511  |
| ENSG00000159588 | CCDC17        | coiled-coil domain containing 17 [Source:HGNC Symbol;Acc:26574]                            | 1.508868616  | 1.734395507  | 8.666784854 | 0.003240624 | 0.027180679 | 0.97176043   | 0.881727766  | 1.534439871  | 2.420374188  | 2.109797605  |
| ENSG00000104856 | RELB          | v-rel avian reticuloendotheliosis viral oncogene homolog B [Source:HGNC Symbol;Acc:9956]   | 1.082288698  | 4.800643193  | 8.657869048 | 0.003256519 | 0.027300952 | 4.27425947   | 4.317040508  | 4.752773603  | 5.45139657   | 4.861640106  |
| ENSG00000229988 | HBBP1         | hemoglobin, beta pseudogene 1 [Source:HGNC Symbol;Acc:4828]                                | -2.797349375 | -0.92808049  | 8.652141176 | 0.003266772 | 0.027360777 | 0.254194054  | 0.016063025  | -3.766908349 | -7.002070102 | -4.610216385 |
| ENSG00000138061 | CYP1B1        | cytochrome P450, family 1, subfamily B, polypeptide 1 [Source:HGNC Symbol;Acc:2597]        | 1.18097505   | 5.910952403  | 8.639424192 | 0.003289654 | 0.027539282 | 4.748218804  | 5.06453179   | 5.263703476  | 6.354552101  | 6.907086147  |



|                 |               |                                                                                                                                                                        |              |              |             |             |             |              |              |              |              |              |
|-----------------|---------------|------------------------------------------------------------------------------------------------------------------------------------------------------------------------|--------------|--------------|-------------|-------------|-------------|--------------|--------------|--------------|--------------|--------------|
| ENSG00000263142 | LRRC37A17P    | leucine rich repeat containing 37, member A17, pseudogene [Source:HGNC Symbol;Acc:48365]                                                                               | 1.493313057  | 0.953353912  | 8.630980271 | 0.003304937 | 0.027654035 | 0.292419846  | 1.010487126  | 1.205290011  | 1.348272594  | 0.378903451  |
| ENSG00000243650 | RN75L834P     | RNA, 75L, cytoplasmic 834, pseudogene [Source:HGNC Symbol;Acc:46850]                                                                                                   | 1.442676796  | 1.200761644  | 8.61979605  | 0.003325291 | 0.027811091 | 0.686141241  | 0.947543428  | 1.644577544  | 1.624609464  | 0.551948963  |
| ENSG00000134548 | C12orf39      | chromosome 12 open reading frame 39 [Source:HGNC Symbol;Acc:28139]                                                                                                     | 1.686258418  | 1.914697271  | 8.611380442 | 0.00334069  | 0.027926578 | 0.686141241  | 1.449588786  | 1.501363361  | 2.704366551  | 2.286800555  |
| ENSG00000181885 | CLDN7         | claudin 7 [Source:HGNC Symbol;Acc:2049]                                                                                                                                | 1.56312512   | 1.071011971  | 8.602409327 | 0.003357186 | 0.028037772 | 0.090278201  | 0.764888368  | 1.265630948  | 1.745170531  | 0.763888603  |
| ENSG00000270069 | RP6-99M1.2    |                                                                                                                                                                        | 2.087991941  | 1.308938546  | 8.599053512 | 0.003363378 | 0.028076126 | 0.92386066   | 0.277241192  | -0.059127673 | 2.572971709  | 1.044483142  |
| ENSG00000196371 | FUT4          | fucosyltransferase 4 (alpha (1,3) fucosyltransferase, myeloid-specific) [Source:HGNC Symbol;Acc:4015]                                                                  | 1.146221598  | 5.344182595  | 8.59706     | 0.003367061 | 0.028093517 | 4.419503295  | 4.620897903  | 4.963262207  | 6.082461368  | 5.854852233  |
| ENSG00000215267 | AKR1C7P       | aldo-keto reductase family 1, member C7, pseudogene [Source:HGNC Symbol;Acc:44681]                                                                                     | 1.639039013  | 0.34174474   | 8.594723973 | 0.003371383 | 0.028116214 | 0.435934254  | -0.157588231 | 0.6928072    | 1.006157955  | -2.526883755 |
| ENSG00000261559 | RP11-1H8.3    |                                                                                                                                                                        | -1.440776368 | 1.794648357  | 8.588504694 | 0.003382917 | 0.0281945   | 2.480234919  | 2.320804564  | 0.250534523  | 0.497040107  | 1.958084208  |
| ENSG00000166963 | MAP1A         | microtubule-associated protein 1A [Source:HGNC Symbol;Acc:6835]                                                                                                        | 1.565318469  | 2.827855901  | 8.587931146 | 0.003383982 | 0.0281945   | 0.94800933   | 2.126114598  | 2.107155349  | 3.100673935  | 4.007360863  |
| ENSG00000271462 | RP11-841C19.4 |                                                                                                                                                                        | 1.62902441   | 0.458966949  | 8.584694883 | 0.003390002 | 0.028231254 | 0.000762307  | -0.355038393 | 0.250534523  | 1.069111613  | 0.615745481  |
| ENSG00000065833 | ME1           | malic enzyme 1, NADP(+)-dependent, cytosolic [Source:HGNC Symbol;Acc:6983]                                                                                             | 1.385625381  | 1.765636497  | 8.580684789 | 0.003397476 | 0.028275068 | 1.063037713  | 1.050973916  | 1.980862385  | 1.926103707  | 2.276968566  |
| ENSG00000242349 | NPPA-AS1      | NPPA antisense RNA 1 [Source:HGNC Symbol;Acc:37635]                                                                                                                    | 1.691940305  | 1.368576485  | 8.580144315 | 0.003398484 | 0.028275068 | 0.329658892  | 0.968831255  | 1.142314722  | 2.420374188  | 0.872340852  |
| ENSG00000004660 | CAMKK1        | calcium/calmodulin-dependent protein kinase kinase 1, alpha [Source:HGNC Symbol;Acc:1469]                                                                              | 1.249225147  | 3.67560561   | 8.577094932 | 0.003404181 | 0.028282248 | 2.659107731  | 3.538353702  | 3.840088097  | 4.263715338  | 3.601447293  |
| ENSG00000112769 | LAMA4         | laminin, alpha 4 [Source:HGNC Symbol;Acc:6484]                                                                                                                         | -2.414106526 | -0.073041694 | 8.552915659 | 0.003449693 | 0.028633264 | 1.268770164  | 0.789025519  | -7.002070102 | -2.97427061  | -2.526883755 |
| ENSG00000100714 | MTHFD1        | methylenetetrahydrofolate dehydrogenase (NADP+ dependent) 1, methylenetetrahydrofolate cyclohydrolase, formyltetrahydrofolate synthetase [Source:HGNC Symbol;Acc:7432] | -1.138779097 | 3.458969445  | 8.54899088  | 0.003457138 | 0.028681503 | 4.175447334  | 4.02350373   | 2.74522259   | 2.491046607  | 3.005085735  |
| ENSG00000196189 | SEMA4A        | sema domain, immunoglobulin domain (Ig), transmembrane domain (TM) and short cytoplasmic domain, (semaphorin) 4A [Source:HGNC Symbol;Acc:10729]                        | 1.125174077  | 6.661423378  | 8.546462788 | 0.003461943 | 0.028707797 | 5.631689742  | 6.126658197  | 6.440844579  | 7.350529121  | 7.090877824  |
| ENSG00000215912 | TTC34         | tetratricopeptide repeat domain 34 [Source:HGNC Symbol;Acc:34297]                                                                                                      | 1.487347227  | 1.077039372  | 8.543725456 | 0.003467153 | 0.028737426 | 0.566455146  | 1.010487126  | 1.802268781  | 0.823471408  | 0.615745481  |
| ENSG00000225036 | RP11-41487.1  |                                                                                                                                                                        | -1.322797137 | 2.192121948  | 8.537751357 | 0.003478551 | 0.028806407 | 3.036645193  | 2.753793145  | 1.205290011  | 0.722650538  | 1.869263524  |
| ENSG00000112299 | VNN1          | vanin 1 [Source:HGNC Symbol;Acc:12705]                                                                                                                                 | 1.221436808  | 3.994382938  | 8.537017998 | 0.003479953 | 0.028806407 | 2.47193131   | 3.396312155  | 3.683019014  | 3.929546638  | 5.141776451  |
| ENSG00000121933 | ADORA3        | adenosine A3 receptor [Source:HGNC Symbol;Acc:268]                                                                                                                     | 1.612377088  | 0.270634841  | 8.536785151 | 0.003480398 | 0.028806407 | -0.365194284 | -0.112176905 | -0.589913612 | 0.074465887  | 1.239342106  |
| ENSG00000189184 | PCDH18        | protocadherin 18 [Source:HGNC Symbol;Acc:14268]                                                                                                                        | -3.315069839 | -0.63929276  | 8.533641626 | 0.003486414 | 0.028842603 | 0.627538984  | 0.343933181  | -4.621297774 | -7.002070102 | -4.610216385 |
| ENSG00000181511 | RP4-655L22.4  |                                                                                                                                                                        | -1.472575807 | 1.286285087  | 8.529970591 | 0.003493453 | 0.028887223 | 2.32292636   | 1.922971788  | -0.10933503  | -0.194626373 | 0.378903451  |
| ENSG00000134827 | TCN1          | transcobalamin I (vitamin B12 binding protein, R binder family) [Source:HGNC Symbol;Acc:11652]                                                                         | -2.642575946 | 1.322336417  | 8.528581593 | 0.003496121 | 0.028888611 | 3.124027351  | -0.068151468 | -2.287883461 | -1.70641174  | 1.06748014   |
| ENSG00000267009 | RP11-120M18.2 |                                                                                                                                                                        | 1.476362661  | 0.685939459  | 8.52816938  | 0.003496913 | 0.028888611 | 0.254194054  | 0.715367718  | 1.030832979  | 1.006157955  | -0.201737898 |
| ENSG00000266786 | RP1-66C13.3   |                                                                                                                                                                        | 1.639027483  | 0.303247723  | 8.527179721 | 0.003498815 | 0.028890729 | -0.425964666 | -0.157588231 | -0.453950945 | 0.527247606  | 1.06748014   |
| ENSG00000236017 | ASMTL-AS1     | ASMTL antisense RNA 1 [Source:HGNC Symbol;Acc:25811]                                                                                                                   | 1.290694489  | 2.78156798   | 8.503342902 | 0.003544946 | 0.029216679 | 1.766505254  | 2.44752696   | 2.942946747  | 3.20246409   | 3.063446788  |
| ENSG00000162148 | PPP1R32       | protein phosphatase 1, regulatory subunit 32 [Source:HGNC Symbol;Acc:28869]                                                                                            | 1.370000104  | 1.623623715  | 8.504147183 | 0.003543379 | 0.029216679 | 1.084982398  | 1.128690501  | 2.004662384  | 1.926103707  | 1.596341512  |
| ENSG00000254726 | MEX3A         | mex-3 RNA binding family member A [Source:HGNC Symbol;Acc:33482]                                                                                                       | -1.655447032 | 0.817861415  | 8.49819454  | 0.003554991 | 0.029285716 | 1.871242652  | 1.387708937  | -2.073364206 | -0.874832399 | 0.551948963  |
| ENSG00000171051 | FPR1          | formyl peptide receptor 1 [Source:HGNC Symbol;Acc:3826]                                                                                                                | 1.29868533   | 7.39424073   | 8.49163339  | 0.003567834 | 0.029377729 | 6.032624381  | 6.805705246  | 7.088356766  | 8.266667368  | 7.777704609  |
| ENSG00000101856 | PGRMC1        | progesterone receptor membrane component 1 [Source:HGNC Symbol;Acc:16090]                                                                                              | 1.059591021  | 5.653158205  | 8.489181545 | 0.003572645 | 0.029403554 | 4.979609644  | 5.054610117  | 5.503907621  | 6.357182107  | 5.887526399  |
| ENSG00000140548 | ZNF710        | zinc finger protein 710 [Source:HGNC Symbol;Acc:25352]                                                                                                                 | 1.108949893  | 5.537334492  | 8.483320086 | 0.003584174 | 0.029470807 | 4.639350983  | 5.057096939  | 5.280860563  | 6.305828777  | 5.800125918  |
| ENSG00000100196 | KDEL3         | KDEL (Lys-Asp-Glu-Leu) endoplasmic reticulum protein retention receptor 3 [Source:HGNC Symbol;Acc:6306]                                                                | -2.107027388 | 0.243563449  | 8.479149656 | 0.0035924   | 0.029516401 | 1.608823392  | 0.925936776  | -2.845623393 | -3.360122781 | -1.18885156  |
| ENSG00000159259 | CHAF1B        | chromatin assembly factor 1, subunit B (p60) [Source:HGNC Symbol;Acc:1911]                                                                                             | -1.338806379 | 2.096219554  | 8.478804402 | 0.003593082 | 0.029516401 | 2.744312733  | 2.759912177  | 0.983710868  | 0.402426505  | 2.109797605  |

|                 |              |                                                                                                                         |              |              |             |             |             |              |              |              |              |              |
|-----------------|--------------|-------------------------------------------------------------------------------------------------------------------------|--------------|--------------|-------------|-------------|-------------|--------------|--------------|--------------|--------------|--------------|
| ENSG00000120800 | UTP20        | UTP20, small subunit (SSU) processome component, homolog (yeast) [Source:HGNC Symbol;Acc:17897]                         | -1.026937702 | 4.837572536  | 8.477059794 | 0.003596529 | 0.029530903 | 5.343889142  | 5.460824645  | 4.610737206  | 3.706806052  | 4.359164014  |
| ENSG00000118187 | DSE          | dermatan sulfate epimerase [Source:HGNC Symbol;Acc:21144]                                                               | 1.089341705  | 5.220896307  | 8.475694461 | 0.00359923  | 0.029539259 | 4.198277527  | 4.592035301  | 4.883676276  | 5.715208396  | 5.946864712  |
| ENSG00000198753 | PLXNB3       | plexin B3 [Source:HGNC Symbol;Acc:9105]                                                                                 | 2.114501764  | 0.591585338  | 8.470396183 | 0.003609728 | 0.029611577 | -1.921450438 | 0.376157587  | -0.453950945 | 1.224680533  | 1.3928929    |
| ENSG00000171298 | GAA          | glucosidase, alpha; acid [Source:HGNC Symbol;Acc:4065]                                                                  | 1.176256091  | 7.323480286  | 8.466641112 | 0.003617188 | 0.02965891  | 6.016300463  | 6.807552595  | 7.283382293  | 7.97957602   | 7.752648931  |
| ENSG00000182287 | AP1S2        | adaptor-related protein complex 1, sigma 2 subunit [Source:HGNC Symbol;Acc:560]                                         | 1.208856402  | 7.123130811  | 8.458207799 | 0.003633998 | 0.029782833 | 5.836369856  | 6.747231608  | 7.12885143   | 7.781171224  | 7.428348591  |
| ENSG00000180263 | FGD6         | FYVE, rhoGEF and PH domain containing 6 [Source:HGNC Symbol;Acc:21740]                                                  | 1.476781362  | 3.722964852  | 8.452560559 | 0.003645299 | 0.02986151  | 2.412428059  | 3.194249349  | 3.175651608  | 4.582382673  | 4.191344602  |
| ENSG00000141384 | TAF4B        | TAF4b RNA polymerase II, TATA box binding protein (TBP)-associated factor, 105kDa [Source:HGNC Symbol;Acc:11538]        | -1.176378819 | 3.727465422  | 8.448912025 | 0.003652619 | 0.02990752  | 4.464143145  | 4.30453643   | 3.403098856  | 2.387817579  | 3.05196192   |
| ENSG00000183401 | CCDC159      | coiled-coil domain containing 159 [Source:HGNC Symbol;Acc:26996]                                                        | 1.009075419  | 5.039127975  | 8.443370523 | 0.003663766 | 0.029981554 | 4.395557368  | 4.729340488  | 5.192958906  | 5.687889473  | 4.828367502  |
| ENSG00000100024 | UPB1         | ureidopropionase, beta [Source:HGNC Symbol;Acc:16297]                                                                   | 1.720703717  | -0.020037996 | 8.442720115 | 0.003665076 | 0.029981554 | -0.942926472 | 0.016063025  | 0.28980717   | -1.231517591 | 0.584199832  |
| ENSG00000244041 | LINC01011    | long intergenic non-protein coding RNA 1011 [Source:HGNC Symbol;Acc:33812]                                              | 1.35983638   | 1.748635437  | 8.432791681 | 0.003685141 | 0.030117625 | 1.127895066  | 1.010487126  | 2.150470541  | 1.937395883  | 2.030092686  |
| ENSG00000078814 | MYH7B        | myosin, heavy chain 7B, cardiac muscle, beta [Source:HGNC Symbol;Acc:15906]                                             | 1.597634141  | -0.287279617 | 8.433544428 | 0.003683616 | 0.030117625 | -0.489407866 | 0.056395802  | 0.081791624  | -0.46496394  | -1.87334355  |
| ENSG00000100077 | ADRBK2       | adrenergic, beta, receptor kinase 2 [Source:HGNC Symbol;Acc:290]                                                        | 1.111501101  | 6.671762444  | 8.420240951 | 0.003710666 | 0.030312119 | 5.609150748  | 6.111185334  | 6.460876785  | 7.403399412  | 7.067897368  |
| ENSG00000181751 | C5orf30      | chromosome 5 open reading frame 30 [Source:HGNC Symbol;Acc:25052]                                                       | -1.141212579 | 3.323053017  | 8.41709024  | 0.003717102 | 0.030341139 | 4.035959242  | 3.807148173  | 2.548775847  | 2.086853261  | 3.210157881  |
| ENSG00000166321 | NUDT13       | nudix (nucleoside diphosphate linked moiety X)-type motif 13 [Source:HGNC Symbol;Acc:18827]                             | 1.487431999  | 1.857625906  | 8.416809835 | 0.003717675 | 0.030341139 | 0.92386066   | 1.593586194  | 1.932051102  | 2.412303653  | 1.920685729  |
| ENSG00000124019 | FAM124B      | family with sequence similarity 124B [Source:HGNC Symbol;Acc:26224]                                                     | -1.379633689 | 2.291305397  | 8.412413555 | 0.003726676 | 0.030400462 | 3.231228835  | 2.678265888  | 0.832340008  | 1.006157955  | 2.206202022  |
| ENSG00000105663 | KMT2B        | lysine (K)-specific methyltransferase 2B [Source:HGNC Symbol;Acc:15840]                                                 | 1.539822867  | 1.692687509  | 8.399780205 | 0.003752664 | 0.030584036 | 1.287817526  | 1.184348258  | 1.450281721  | 2.452212292  | 1.564363944  |
| ENSG00000197320 | AC060834.2   |                                                                                                                         | 1.861195958  | 0.735931563  | 8.398753952 | 0.003754783 | 0.030586077 | -1.237502295 | 0.376157587  | 1.397324829  | 0.229488395  | 1.35601001   |
| ENSG00000081148 | IMP2         | interphotoreceptor matrix proteoglycan 2 [Source:HGNC Symbol;Acc:18362]                                                 | 1.526961758  | 0.308009692  | 8.394091021 | 0.003764427 | 0.030637236 | -0.046168491 | 0.277241192  | 0.858697288  | -0.009775356 | -0.095747566 |
| ENSG00000107104 | KANK1        | KN motif and ankyrin repeat domains 1 [Source:HGNC Symbol;Acc:19309]                                                    | -1.399736175 | 3.679056263  | 8.383800452 | 0.0037858   | 0.030768387 | 4.318925344  | 4.372005251  | 3.447189363  | 1.582074621  | 3.199787516  |
| ENSG00000141068 | KSR1         | kinase suppressor of ras 1 [Source:HGNC Symbol;Acc:6465]                                                                | 1.099487696  | 6.161682184  | 8.384365215 | 0.003784624 | 0.030768387 | 5.312843542  | 5.63987453   | 6.002769437  | 7.112578036  | 6.034088822  |
| ENSG00000138316 | ADAMTS14     | ADAM metalloproteinase with thrombospondin type 1 motif, 14 [Source:HGNC Symbol;Acc:14899]                              | -1.675218819 | 1.303479036  | 8.380584061 | 0.003792505 | 0.030808621 | 2.6444045    | 1.724506406  | -0.99931534  | -0.589083246 | 0.415212929  |
| ENSG00000109684 | CLNK         | cytokine-dependent hematopoietic cell linker [Source:HGNC Symbol;Acc:17438]                                             | 2.110853924  | 0.352597716  | 8.378225552 | 0.00379743  | 0.030834358 | 0.174562846  | -0.647226338 | -1.57307192  | 1.692827451  | -0.440394449 |
| ENSG00000248334 | WHAMMP2      | WAS protein homolog associated with actin, golgi membranes and microtubules pseudogene 2 [Source:HGNC Symbol;Acc:32360] | 1.138370133  | 3.434442486  | 8.367947479 | 0.003818967 | 0.030994899 | 2.798442909  | 3.229953478  | 3.793029032  | 3.761832794  | 3.324348684  |
| ENSG00000187990 | HIST1H2BG    | histone cluster 1, H2bg [Source:HGNC Symbol;Acc:4746]                                                                   | 1.927157968  | 0.41810547   | 8.360386753 | 0.003834889 | 0.031109743 | 0.214927798  | -1.191564836 | 0.168628767  | 1.048430793  | 0.706443614  |
| ENSG00000074276 | CDHR2        | cadherin-related family member 2 [Source:HGNC Symbol;Acc:18231]                                                         | 1.749583585  | 0.046642724  | 8.357257182 | 0.0038415   | 0.031148974 | -0.942926472 | 0.310972527  | 0.663204908  | -1.133744865 | 0.139468177  |
| ENSG00000072422 | RHOBTB1      | Rho-related BTB domain containing 1 [Source:HGNC Symbol;Acc:18738]                                                      | 1.337416523  | 3.068233866  | 8.336374485 | 0.003885907 | 0.031494502 | 2.313663059  | 2.393450112  | 2.759281478  | 3.732962613  | 3.507874397  |
| ENSG00000270491 | RP4-743O11.1 |                                                                                                                         | 1.540699507  | 1.236136093  | 8.334607057 | 0.003889689 | 0.031510609 | 0.534915169  | 0.583576386  | 0.934997507  | 1.679439471  | 1.788521245  |
| ENSG00000087253 | LPCAT2       | lysophosphatidylcholine acyltransferase 2 [Source:HGNC Symbol;Acc:26032]                                                | 1.092662283  | 5.641786985  | 8.331598912 | 0.003896135 | 0.031548271 | 4.551452856  | 5.375723561  | 5.585079744  | 6.214796707  | 5.956906344  |
| ENSG00000109743 | BST1         | bone marrow stromal cell antigen 1 [Source:HGNC Symbol;Acc:1118]                                                        | 1.209993402  | 5.952422321  | 8.328274842 | 0.003903271 | 0.031591479 | 4.765307615  | 5.45329231   | 5.504950982  | 6.612289061  | 6.571270519  |
| ENSG00000179271 | GADD45GIP1   | growth arrest and DNA-damage-inducible, gamma interacting protein 1 [Source:HGNC Symbol;Acc:29996]                      | -1.028269861 | 4.237187603  | 8.326526376 | 0.00390703  | 0.031607329 | 4.8795764    | 4.649194385  | 3.740844752  | 3.427354029  | 3.940421563  |
| ENSG00000035862 | TIMP2        | TIMP metalloproteinase inhibitor 2 [Source:HGNC Symbol;Acc:11821]                                                       | 1.172086952  | 6.97354347   | 8.323006812 | 0.003914607 | 0.03161036  | 5.682950487  | 6.386010826  | 6.661348042  | 7.688143569  | 7.536349247  |
| ENSG00000259388 | CTD-2647E9.1 |                                                                                                                         | 1.470638203  | 0.917465798  | 8.325196004 | 0.003909892 | 0.03161036  | 0.686141241  | 0.310972527  | 1.304500245  | 1.508271876  | 0.002986071  |
| ENSG00000144214 | LYG1         | lysozyme G-like 1 [Source:HGNC Symbol;Acc:27014]                                                                        | 1.490228767  | 0.422349276  | 8.324125824 | 0.003912196 | 0.03161036  | 0.133035942  | 0.310972527  | 0.6928072    | 0.58582888   | -0.045536284 |

|                 |               |                                                                                                      |              |              |             |             |             |              |              |              |              |              |
|-----------------|---------------|------------------------------------------------------------------------------------------------------|--------------|--------------|-------------|-------------|-------------|--------------|--------------|--------------|--------------|--------------|
| ENSG00000113555 | PCDH12        | protocadherin 12 [Source:HGNC Symbol;Acc:8657]                                                       | 1.681715355  | 0.60126037   | 8.323623749 | 0.003913278 | 0.03161036  | -0.425964666 | 0.812765477  | 0.602113338  | 1.048430793  | 0.264147325  |
| ENSG00000244687 | UBE2V1        | ubiquitin-conjugating enzyme E2 variant 1 [Source:HGNC Symbol;Acc:12494]                             | 1.334009824  | 2.214565791  | 8.318807509 | 0.003923667 | 0.031668954 | 1.682639457  | 1.997369264  | 2.474024282  | 2.924622147  | 1.35601001   |
| ENSG00000155974 | GRIP1         | glutamate receptor interacting protein 1 [Source:HGNC Symbol;Acc:18708]                              | 1.61095993   | 0.331514402  | 8.312362121 | 0.003937615 | 0.031766925 | -0.698419327 | -0.112176905 | -0.059127673 | 0.61425099   | 0.997359302  |
| ENSG00000122547 | EEDP1         | endonuclease/exonuclease/phosphatase family domain containing 1 [Source:HGNC Symbol;Acc:22223]       | 1.128017875  | 3.877943256  | 8.304078557 | 0.003955615 | 0.03189748  | 3.02534068   | 3.516835107  | 3.987706675  | 4.472179951  | 3.962059208  |
| ENSG00000152661 | GJA1          | gap junction protein, alpha 1, 43kDa [Source:HGNC Symbol;Acc:4274]                                   | -1.977556806 | 0.023536406  | 8.300873174 | 0.003962602 | 0.031939057 | 0.97176043   | 1.237938318  | -4.621297774 | -2.205328685 | -2.526883755 |
| ENSG00000226137 | BAIAP2-AS1    | BAIAP2 antisense RNA 1 (head to head) [Source:HGNC Symbol;Acc:44342]                                 | 1.218115293  | 4.742298378  | 8.297885024 | 0.003969128 | 0.031947746 | 3.317173381  | 4.329437141  | 4.571437007  | 5.341999652  | 5.290900672  |
| ENSG00000211698 | TRGV4         | T cell receptor gamma variable 4 [Source:HGNC Symbol;Acc:12289]                                      | 1.364731884  | 1.727179793  | 8.298545324 | 0.003967685 | 0.031947746 | 0.995126841  | 1.272590116  | 1.944409617  | 1.832435869  | 2.164148811  |
| ENSG00000259623 | RP11-156E6.1  |                                                                                                      | 1.136381691  | 3.718559523  | 8.295093083 | 0.003975234 | 0.031982235 | 3.326414242  | 3.364539756  | 4.08580111   | 4.400553776  | 2.8278729    |
| ENSG00000213250 | RBMS2P1       | RNA binding motif, single stranded interacting protein 2 pseudogene 1 [Source:HGNC Symbol;Acc:30994] | 1.407220337  | 1.94680574   | 8.284228665 | 0.003999089 | 0.032159416 | 0.97176043   | 1.403429499  | 1.829176068  | 2.249705807  | 2.610226292  |
| ENSG00000253636 | RP11-531A24.5 |                                                                                                      | 1.574458692  | 0.367938189  | 8.28334304  | 0.00400104  | 0.032160373 | -0.489407866 | 0.343933181  | 0.75024962   | 0.497040107  | 0.139468177  |
| ENSG00000236484 | RRM2P2        | ribonucleotide reductase M2 polypeptide pseudogene 2 [Source:HGNC Symbol;Acc:10454]                  | -2.29672293  | -0.508780137 | 8.273292438 | 0.004023248 | 0.032294523 | 0.502670228  | 0.095631612  | -3.766908349 | -3.888428289 | -0.726511138 |
| ENSG00000203602 | AL137059.1    |                                                                                                      | 1.536242872  | 0.124437833  | 8.274054779 | 0.004021559 | 0.032294523 | -0.489407866 | 0.056395802  | 0.75024962   | 0.301169826  | -0.9858258   |
| ENSG00000109927 | TECTA         | tectorin alpha [Source:HGNC Symbol;Acc:11720]                                                        | 1.5942378    | 0.050523186  | 8.274269585 | 0.004021084 | 0.032294523 | -0.046168491 | -0.464918547 | 0.036330944  | -0.146146183 | 0.378903451  |
| ENSG00000137752 | CASP1         | caspace 1, apoptosis-related cysteine peptidase [Source:HGNC Symbol;Acc:1499]                        | 1.158150589  | 7.426166119  | 8.266001268 | 0.004039438 | 0.032409657 | 6.238158112  | 6.926568062  | 7.389445144  | 8.122929057  | 7.755528238  |
| ENSG00000049130 | KITLG         | KIT ligand [Source:HGNC Symbol;Acc:6343]                                                             | -1.86531439  | 0.314645451  | 8.264838142 | 0.004042026 | 0.032415612 | 1.482250559  | 1.289608822  | -2.845623393 | -2.419096061 | -1.55968627  |
| ENSG00000267702 | RP11-53B2.2   |                                                                                                      | 1.576357854  | 0.417296858  | 8.261579946 | 0.004049287 | 0.032459012 | -0.555769858 | 0.095631612  | 0.538319988  | 0.823471408  | 0.518960621  |
| ENSG00000162437 | RAVER2        | ribonucleoprotein, PTB-binding 2 [Source:HGNC Symbol;Acc:25577]                                      | -1.106178508 | 3.493538914  | 8.25809348  | 0.004057071 | 0.032491737 | 4.041581121  | 3.997844747  | 2.680205034  | 2.371259556  | 3.585603588  |
| ENSG00000240505 | TNFRSF13B     | tumor necrosis factor receptor superfamily, member 13B [Source:HGNC Symbol;Acc:18153]                | -1.271119111 | 3.047099909  | 8.255843862 | 0.004062102 | 0.032517192 | 4.1728882    | 3.457831828  | 2.413082378  | 1.948600359  | 1.498200525  |
| ENSG00000211584 | SLC48A1       | solute carrier family 48 (heme transporter), member 1 [Source:HGNC Symbol;Acc:26035]                 | -1.021766856 | 4.466941908  | 8.245250729 | 0.004085876 | 0.032692599 | 5.048237693  | 4.977939425  | 3.626618026  | 3.857072211  | 4.235164774  |
| ENSG00000189223 | PAX8-AS1      | PAX8 antisense RNA 1 [Source:HGNC Symbol;Acc:49271]                                                  | 1.19693686   | 4.722013181  | 8.239208463 | 0.004099501 | 0.032779026 | 3.912537499  | 4.143030294  | 4.293278938  | 5.523413729  | 5.059572022  |
| ENSG00000211900 | IGHJ6         | immunoglobulin heavy joining 6 [Source:HGNC Symbol;Acc:5540]                                         | -1.21072839  | 2.925445905  | 8.234059565 | 0.004111147 | 0.032834934 | 3.878388807  | 2.772072928  | 1.432844522  | 2.924622147  | 2.554342782  |
| ENSG00000114491 | UMP5          | uridine monophosphate synthetase [Source:HGNC Symbol;Acc:12563]                                      | -1.096722766 | 4.364101272  | 8.226539394 | 0.004128217 | 0.032941298 | 4.992728541  | 4.883015316  | 4.13515342   | 2.87850017   | 4.036790502  |
| ENSG00000166548 | TK2           | thymidine kinase 2, mitochondrial [Source:HGNC Symbol;Acc:11831]                                     | 1.136653938  | 5.258681634  | 8.22670374  | 0.004127843 | 0.032941298 | 4.457849968  | 4.683399588  | 4.88688142   | 5.958389745  | 5.69236789   |
| ENSG00000075826 | SEC31B        | SEC31 homolog B (S. cerevisiae) [Source:HGNC Symbol;Acc:23197]                                       | 1.003827557  | 5.708265849  | 8.223463129 | 0.004135221 | 0.032982192 | 5.002850287  | 5.518806299  | 6.489095485  | 5.696222699  | 5.377412319  |
| ENSG00000166562 | SEC11C        | SEC11 homolog C (S. cerevisiae) [Source:HGNC Symbol;Acc:23400]                                       | -1.049791546 | 5.21981548   | 8.222571017 | 0.004137254 | 0.032983424 | 6.012727211  | 5.431415179  | 4.864294423  | 4.283760478  | 4.894162617  |
| ENSG00000229391 | HLA-DRB6      | major histocompatibility complex, class II, DR beta 6 (pseudogene) [Source:HGNC Symbol;Acc:4954]     | 1.326801498  | 5.375211272  | 8.2189223   | 0.004145581 | 0.033019818 | 1.819824215  | 1.306429105  | 1.689321579  | 3.065082826  | 7.568443088  |
| ENSG00000271975 | RP11-383J24.6 |                                                                                                      | 1.197712325  | 2.993807935  | 8.210204301 | 0.004165546 | 0.033133739 | 2.207636582  | 2.729054134  | 3.232187228  | 3.257559794  | 3.225574983  |
| ENSG00000156414 | TDRD9         | tudor domain containing 9 [Source:HGNC Symbol;Acc:20122]                                             | 1.403446127  | 4.000509691  | 8.211020211 | 0.004163673 | 0.033133739 | 2.702339162  | 3.277647049  | 3.267044131  | 4.701415938  | 4.802899588  |
| ENSG00000082996 | RNF13         | ring finger protein 13 [Source:HGNC Symbol;Acc:10057]                                                | 1.011776312  | 5.447470519  | 8.207519919 | 0.004171713 | 0.03315275  | 4.590329104  | 5.012946303  | 5.428930958  | 5.966680081  | 5.805265449  |
| ENSG00000251002 | AE000661.37   |                                                                                                      | 1.597713462  | 0.715632715  | 8.208025123 | 0.004170552 | 0.03315275  | 0.292419846  | 0.527293245  | 0.081791624  | 1.446384807  | 0.551948963  |
| ENSG00000173548 | SNX33         | sorting nexin 33 [Source:HGNC Symbol;Acc:28468]                                                      | 1.176858248  | 3.637140257  | 8.206383322 | 0.004174327 | 0.033158513 | 3.036645193  | 3.100920657  | 3.622778389  | 4.22046047   | 3.827080113  |
| ENSG00000129007 | CALML4        | calmodulin-like 4 [Source:HGNC Symbol;Acc:18445]                                                     | 1.31401549   | 3.713116691  | 8.203796206 | 0.004180283 | 0.033190808 | 2.680885373  | 3.368549783  | 3.527421294  | 4.47411968   | 3.886481022  |
| ENSG00000125505 | MBOAT7        | membrane bound O-acyltransferase domain containing 7 [Source:HGNC Symbol;Acc:15505]                  | 1.139767564  | 6.79332009   | 8.195769764 | 0.004198818 | 0.033322894 | 5.812728526  | 6.25621489   | 6.52605315   | 7.594954242  | 7.089123035  |
| ENSG00000163737 | PF4           | platelet factor 4 [Source:HGNC Symbol;Acc:8861]                                                      | 1.467892238  | 5.793708941  | 8.182606809 | 0.004229394 | 0.033550388 | 4.063852094  | 5.547388326  | 5.451835903  | 6.739094142  | 5.97678233   |

|                 |               |                                                                                                 |              |             |             |             |             |              |              |              |              |              |
|-----------------|---------------|-------------------------------------------------------------------------------------------------|--------------|-------------|-------------|-------------|-------------|--------------|--------------|--------------|--------------|--------------|
| ENSG00000117281 | CD160         | CD160 molecule [Source:HGNC Symbol;Acc:17013]                                                   | -1.300765503 | 4.052456121 | 8.177677797 | 0.004240902 | 0.033610008 | 4.916759578  | 3.847931966  | 2.800654358  | 2.895969157  | 4.567094213  |
| ENSG00000109458 | GAB1          | GRB2-associated binding protein 1 [Source:HGNC Symbol;Acc:4066]                                 | -1.29328306  | 4.333691289 | 8.1761104   | 0.004244568 | 0.033610008 | 4.8795764    | 4.932612871  | 2.532495892  | 3.886500298  | 4.319003578  |
| ENSG00000178502 | KLHL11        | kelch-like family member 11 [Source:HGNC Symbol;Acc:19008]                                      | 1.163897649  | 3.362910631 | 8.178017283 | 0.004240108 | 0.033610008 | 3.124027351  | 2.860151049  | 3.664462604  | 4.072114777  | 2.504656975  |
| ENSG00000230715 | RP11-274B21.4 |                                                                                                 | 1.040939696  | 4.053123735 | 8.168334951 | 0.004262802 | 0.033739175 | 3.827228993  | 3.683837545  | 4.518691979  | 4.462441992  | 3.421261246  |
| ENSG00000142046 | TMEM91        | transmembrane protein 91 [Source:HGNC Symbol;Acc:32393]                                         | 1.216882098  | 3.581465871 | 8.157686948 | 0.004287902 | 0.033907264 | 2.723478589  | 3.234355     | 3.5025636    | 4.180627867  | 3.816937756  |
| ENSG00000038427 | VCAN          | versican [Source:HGNC Symbol;Acc:2464]                                                          | 1.737116325  | 10.22720198 | 8.147950446 | 0.004310986 | 0.03407445  | 7.955671156  | 9.10452085   | 9.708888066  | 11.01302763  | 11.16166129  |
| ENSG00000134256 | CD101         | CD101 molecule [Source:HGNC Symbol;Acc:5949]                                                    | 1.034864666  | 5.014668989 | 8.145359898 | 0.004317149 | 0.034092462 | 3.951879815  | 4.854706069  | 5.37174208   | 5.136898111  | 5.335397107  |
| ENSG00000241839 | PLEKHO2       | pleckstrin homology domain containing, family O member 2 [Source:HGNC Symbol;Acc:30026]         | 1.06938475   | 6.484337426 | 8.14385988  | 0.004320721 | 0.034105334 | 5.767646993  | 5.979072822  | 6.367022969  | 7.246560553  | 6.576289928  |
| ENSG00000115392 | FANCL         | Fanconi anemia, complementation group L [Source:HGNC Symbol;Acc:20748]                          | -1.239543064 | 2.803696167 | 8.142085691 | 0.004324951 | 0.034123376 | 3.445697229  | 3.198760988  | 1.582674799  | 1.679439471  | 3.063446788  |
| ENSG00000163803 | PLB1          | phospholipase B1 [Source:HGNC Symbol;Acc:30041]                                                 | 1.239067796  | 4.630689803 | 8.138584327 | 0.004333331 | 0.034163776 | 3.274841002  | 3.583904609  | 3.71943079   | 5.085802361  | 5.776768725  |
| ENSG00000163736 | PPBP          | pro-platelet basic protein (chemokine [C-X-C motif] ligand 7) [Source:HGNC Symbol;Acc:9240]     | 1.633875211  | 7.156510639 | 8.138311001 | 0.004333963 | 0.034163776 | 4.964891797  | 6.86651611   | 6.82735608   | 8.005122308  | 7.604759649  |
| ENSG00000151726 | ACSL1         | acyl-CoA synthetase long-chain family member 1 [Source:HGNC Symbol;Acc:3569]                    | 1.321927645  | 7.318095567 | 8.132216474 | 0.004348555 | 0.034263416 | 6.219059437  | 6.206115746  | 6.634427235  | 8.181382164  | 8.020396666  |
| ENSG00000165178 | NCF1C         | neutrophil cytosolic factor 1C pseudogene [Source:HGNC Symbol;Acc:32523]                        | 1.169952143  | 4.482038407 | 8.128328841 | 0.00435789  | 0.034321558 | 3.915602215  | 3.856523346  | 4.218927114  | 5.233961488  | 4.679583759  |
| ENSG00000259340 | CTD-2027G2.1  |                                                                                                 | -1.550909367 | 0.44814655  | 8.123474765 | 0.004369573 | 0.03439814  | 1.431768352  | 1.010487126  | -1.202308962 | -0.874832399 | -0.257803757 |
| ENSG00000214954 | LRRC69        | leucine rich repeat containing 69 [Source:HGNC Symbol;Acc:34303]                                | 1.55365244   | 0.248678634 | 8.111575767 | 0.004398348 | 0.034593635 | -0.14487434  | 0.277241192  | 1.053829154  | -0.244792505 | -0.649489103 |
| ENSG00000110777 | POU2AF1       | POU class 2 associating factor 1 [Source:HGNC Symbol;Acc:9211]                                  | -1.050406318 | 5.979655561 | 8.109795571 | 0.004402669 | 0.034596624 | 6.684189364  | 6.099772366  | 5.54810444   | 5.384904003  | 5.788061994  |
| ENSG00000105339 | DENND3        | DENN/MADD domain containing 3 [Source:HGNC Symbol;Acc:29134]                                    | 1.278327821  | 7.093394091 | 8.11012141  | 0.004401878 | 0.034596624 | 6.113586324  | 6.14664474   | 6.541897341  | 8.072447923  | 7.492415741  |
| ENSG00000161960 | EIF4A1        | eukaryotic translation initiation factor 4A1 [Source:HGNC Symbol;Acc:3282]                      | 1.162607435  | 5.154279529 | 8.108814965 | 0.004405051 | 0.034599856 | 4.715181607  | 4.419164558  | 4.981367087  | 6.191406778  | 4.668345358  |
| ENSG00000141526 | SLC16A3       | solute carrier family 16 (monocarboxylate transporter), member 3 [Source:HGNC Symbol;Acc:10924] | 1.14062405   | 6.58885029  | 8.10555608  | 0.004412978 | 0.034631127 | 5.7333209    | 5.90024216   | 6.220380616  | 7.330861481  | 7.050328387  |
| ENSG00000151117 | TMEM86A       | transmembrane protein 86A [Source:HGNC Symbol;Acc:26890]                                        | 1.400979391  | 1.895445125 | 8.10583764  | 0.004412293 | 0.034631127 | 1.040754067  | 1.371815184  | 1.868618824  | 2.412303653  | 2.236956541  |
| ENSG00000172159 | FRMD3         | FERM domain containing 3 [Source:HGNC Symbol;Acc:24125]                                         | 1.240856005  | 3.071004615 | 8.098231773 | 0.004430846 | 0.034735418 | 1.920891399  | 2.557000471  | 2.979436032  | 3.531617698  | 3.659358136  |
| ENSG00000124713 | GNMT          | glycine N-methyltransferase [Source:HGNC Symbol;Acc:4415]                                       | 1.522374521  | 0.796185185 | 8.099064305 | 0.004428812 | 0.034735418 | 0.133035942  | 0.310972527  | 0.663204908  | 1.493047208  | 0.735452007  |
| ENSG00000185482 | STAC3         | SH3 and cysteine rich domain 3 [Source:HGNC Symbol;Acc:28423]                                   | 1.189348888  | 4.001798112 | 8.095946039 | 0.004436438 | 0.034737583 | 3.075527676  | 3.494990685  | 3.768911065  | 4.659413665  | 4.407278515  |
| ENSG00000270060 | RP11-390K5.6  |                                                                                                 | 1.378448589  | 1.20623569  | 8.094293955 | 0.004440483 | 0.03475376  | 0.742455703  | 0.859104642  | 1.774850102  | 1.43048915   | 0.735452007  |
| ENSG00000162685 | LSP1P3        | lymphocyte-specific protein 1 pseudogene 3 [Source:HGNC Symbol;Acc:39718]                       | 1.150084141  | 3.649011159 | 8.086053727 | 0.004460719 | 0.034882727 | 2.943627224  | 3.446494941  | 3.879237643  | 4.241111357  | 3.352708597  |
| ENSG00000148926 | ADM           | adrenomedullin [Source:HGNC Symbol;Acc:259]                                                     | 1.805173877  | 3.870870798 | 8.085965691 | 0.004460935 | 0.034882727 | 2.996685683  | 2.278807152  | 2.465474326  | 5.007606819  | 4.481928444  |
| ENSG00000073331 | ALPK1         | alpha-kinase 1 [Source:HGNC Symbol;Acc:20917]                                                   | 1.175419847  | 5.011843186 | 8.084836361 | 0.004463716 | 0.03488893  | 4.131312362  | 4.279198377  | 4.499975339  | 5.683704741  | 5.646332579  |
| ENSG00000139668 | WDFY2         | WD repeat and FYVE domain containing 2 [Source:HGNC Symbol;Acc:20482]                           | 1.029713412  | 5.170476163 | 8.080386376 | 0.00447469  | 0.034912529 | 4.513524074  | 4.696219752  | 5.122649699  | 5.835518293  | 5.288455913  |
| ENSG00000142733 | MAP3K6        | mitogen-activated protein kinase kinase kinase 6 [Source:HGNC Symbol;Acc:6858]                  | 1.158209069  | 3.876091039 | 8.08156476  | 0.004471782 | 0.034912529 | 3.075527676  | 3.53121644   | 3.888861257  | 4.499101663  | 3.974279416  |
| ENSG00000228486 | LINC01125     | long intergenic non-protein coding RNA 1125 [Source:HGNC Symbol;Acc:49272]                      | 1.321838056  | 2.041321402 | 8.082452382 | 0.004469592 | 0.034912529 | 1.306616686  | 1.844528154  | 2.74522259   | 2.045707388  | 1.774613685  |
| ENSG00000236871 | LINC00106     | long intergenic non-protein coding RNA 106 [Source:HGNC Symbol;Acc:31843]                       | 1.420390686  | 2.014875049 | 8.081015196 | 0.004473138 | 0.034912529 | 0.823008709  | 1.634124584  | 2.039642018  | 2.521378548  | 2.381602043  |
| ENSG00000261471 | RP11-61F12.1  |                                                                                                 | 1.949165514  | 0.244253453 | 8.074182606 | 0.004490036 | 0.035016693 | -0.094677427 | -1.100062965 | -0.520331194 | 1.187332556  | 0.341656497  |
| ENSG00000109534 | GAR1          | GAR1 ribonucleoprotein [Source:HGNC Symbol;Acc:14264]                                           | -1.145110883 | 3.038195269 | 8.073256661 | 0.004492331 | 0.035019034 | 3.694354129  | 3.651289677  | 2.223277091  | 2.056104393  | 2.686482162  |
| ENSG00000111321 | LTBR          | lymphotoxin beta receptor (TNFR superfamily, member 3) [Source:HGNC Symbol;Acc:6718]            | 1.2857299    | 6.033472217 | 8.062105145 | 0.004520064 | 0.035219581 | 4.720448566  | 5.490566773  | 5.451835903  | 6.858621547  | 6.586276659  |
| ENSG00000109099 | PMP22         | peripheral myelin protein 22 [Source:HGNC Symbol;Acc:9118]                                      | -1.51100809  | 1.71147904  | 8.060802243 | 0.004523315 | 0.03522928  | 2.636996308  | 2.144940142  | -0.82139248  | 0.301169826  | 1.869263524  |

|                 |               |                                                                                                                                                           |              |              |             |             |             |              |              |              |              |              |
|-----------------|---------------|-----------------------------------------------------------------------------------------------------------------------------------------------------------|--------------|--------------|-------------|-------------|-------------|--------------|--------------|--------------|--------------|--------------|
| ENSG00000204010 | IFIT1B        | interferon-induced protein with tetra-ricopeptide repeats 1B [Source:HGNC Symbol;Acc:23442]                                                               | -1.762613278 | 1.375001244  | 8.056449626 | 0.004534195 | 0.035296085 | 1.623891846  | 2.345428436  | 0.437007322  | -3.360122781 | 1.612068369  |
| ENSG00000239969 | RP11-163E9.2  |                                                                                                                                                           | 1.485096527  | 0.133395328  | 8.055762885 | 0.004535914 | 0.035296085 | -0.046168491 | 0.016063025  | 0.401591237  | 0.265774258  | -0.506781561 |
| ENSG00000267904 | CTC-429P9.5   |                                                                                                                                                           | 1.361074441  | 1.603328301  | 8.054857403 | 0.004538181 | 0.035298084 | 0.94800933   | 1.464652754  | 2.051115931  | 1.844482366  | 1.318159404  |
| ENSG00000106348 | IMPDH1        | IMP (inosine 5'-monophosphate) dehydrogenase 1 [Source:HGNC Symbol;Acc:6052]                                                                              | 1.034927777  | 5.966683451  | 8.050811252 | 0.004548328 | 0.035361338 | 5.249887894  | 5.51157143   | 5.841977792  | 6.638903288  | 6.164461608  |
| ENSG00000123384 | LRP1          | low density lipoprotein receptor-related protein 1 [Source:HGNC Symbol;Acc:6692]                                                                          | 1.619063863  | 8.92003214   | 8.048217779 | 0.004554844 | 0.035396321 | 7.265666822  | 8.062536685  | 8.328098466  | 10.06644237  | 9.245103828  |
| ENSG00000161643 | SIGLEC16      | sialic acid binding Ig-like lectin 16 (gene/pseudogene) [Source:HGNC Symbol;Acc:24851]                                                                    | 1.488048435  | 1.776674899  | 8.045054367 | 0.004562805 | 0.035442496 | 0.657137645  | 1.523383318  | 1.881530361  | 2.50629229   | 1.596341512  |
| ENSG00000103642 | LACTB         | lactamase, beta [Source:HGNC Symbol;Acc:16468]                                                                                                            | 1.226840146  | 5.070892105  | 8.040772329 | 0.004573603 | 0.035510661 | 4.33045325   | 4.574783594  | 4.677037216  | 5.834763651  | 5.363542761  |
| ENSG00000181418 | DDN           | dendrin [Source:HGNC Symbol;Acc:24458]                                                                                                                    | -1.751953858 | 0.297732797  | 8.036162316 | 0.004585258 | 0.035585411 | 1.514949964  | 0.812765477  | -2.539967122 | -1.449512048 | -0.506781561 |
| ENSG00000226124 | FTCDNL1       | forminotransferase cyclodeaminase N-terminal like [Source:HGNC Symbol;Acc:48661]                                                                          | 1.529809882  | 0.528629328  | 8.03279507  | 0.00459379  | 0.035635871 | 0.401371743  | 0.133828548  | 0.437007322  | 0.823471408  | 0.485200289  |
| ENSG00000196421 | LINC00176     | long intergenic non-protein coding RNA 176 [Source:HGNC Symbol;Acc:27655]                                                                                 | 1.745234523  | -0.22903102  | 8.030842113 | 0.004598745 | 0.035642814 | -0.555769858 | -1.289265519 | 0.28980717   | -1.042179808 | 0.303422373  |
| ENSG00000230204 | FTH1P5        | ferritin, heavy polypeptide 1 pseudogene 5 [Source:HGNC Symbol;Acc:3996]                                                                                  | 1.622350426  | 1.191739769  | 8.024088157 | 0.004615926 | 0.035760185 | 0.627538984  | 0.637745977  | 0.778135316  | 1.937395883  | 1.318159404  |
| ENSG00000255524 | NPIP88        | nuclear pore complex interacting protein family, member 88 [Source:HGNC Symbol;Acc:37490]                                                                 | 1.453731189  | 0.339892032  | 8.00911922  | 0.004654237 | 0.036025189 | 0.090278201  | 0.310972527  | 0.778135316  | 0.335717742  | -0.376928291 |
| ENSG00000168010 | ATG16L2       | autophagy related 16-like 2 (S. cerevisiae) [Source:HGNC Symbol;Acc:25464]                                                                                | 1.253325118  | 8.318219267  | 8.002558402 | 0.00467113  | 0.036140015 | 7.274944167  | 7.463916478  | 8.17984428   | 9.165845175  | 8.643268767  |
| ENSG00000128512 | DOCK4         | dedicator of cytokinesis 4 [Source:HGNC Symbol;Acc:19192]                                                                                                 | 1.452177648  | 1.884930829  | 7.994192816 | 0.004692762 | 0.036291379 | 0.214927798  | 1.050973916  | 1.432844522  | 2.003353492  | 3.05196192   |
| ENSG00000165046 | LETM2         | leucine zipper-EF-hand containing transmembrane protein 2 [Source:HGNC Symbol;Acc:14648]                                                                  | 1.486783675  | 1.539922223  | 7.991625351 | 0.004699421 | 0.036314286 | 1.148882041  | 0.789025519  | 1.432844522  | 1.992567844  | 1.869263524  |
| ENSG00000269657 | AC079210.1    | Uncharacterized protein; cDNA FLJ45097 fis, clone BRAWH3031054 [Source:UniProtKB/TrEMBL;Acc:Q6Z5Z7]                                                       | 1.621680905  | 0.053645616  | 7.990931394 | 0.004701222 | 0.036314286 | -0.856736938 | -0.408932621 | -0.329705368 | 0.402426505  | 0.584199832  |
| ENSG00000226148 | SLC25A39P1    | solute carrier family 25, member 39 pseudogene 1 [Source:HGNC Symbol;Acc:43859]                                                                           | -1.116446743 | 3.760112819  | 7.987724781 | 0.004709556 | 0.036337345 | 4.316608668  | 4.530729604  | 3.329625449  | 2.412303653  | 3.173530708  |
| ENSG00000256238 | RP11-473N11.2 |                                                                                                                                                           | -1.029029768 | 6.395719416  | 7.98687412  | 0.00471177  | 0.036337345 | 6.739714253  | 6.884480586  | 6.204412517  | 5.270136417  | 6.38129761   |
| ENSG00000164885 | CDK5          | cyclin-dependent kinase 5 [Source:HGNC Symbol;Acc:1774]                                                                                                   | 1.502936716  | 0.785423975  | 7.987108258 | 0.00471116  | 0.036337345 | 0.174562846  | 0.242702272  | 0.505333341  | 1.314027603  | 1.090116303  |
| ENSG00000060982 | BCAT1         | branched chain amino-acid transaminase 1, cytosolic [Source:HGNC Symbol;Acc:976]                                                                          | -1.007914109 | 4.168919089  | 7.980479926 | 0.004728441 | 0.036422893 | 4.557351498  | 4.605689658  | 3.506736406  | 3.188355007  | 4.411778255  |
| ENSG00000138670 | RASGEF1B      | RasGEF domain family, member 1B [Source:HGNC Symbol;Acc:24881]                                                                                            | 1.752221902  | 5.417441542  | 7.97344597  | 0.004746849 | 0.036537842 | 4.360001702  | 4.349864383  | 4.0084551    | 7.071849427  | 4.445086256  |
| ENSG00000234456 | MAGI2-AS3     | MAGI2 antisense RNA 3 [Source:HGNC Symbol;Acc:40862]                                                                                                      | 1.760434832  | 1.376582556  | 7.973187816 | 0.004747526 | 0.036537842 | 0.435934254  | 1.237938318  | 0.934997507  | 2.444318394  | 0.676839958  |
| ENSG00000197498 | RPF2          | ribosome production factor 2 homolog (S. cerevisiae) [Source:HGNC Symbol;Acc:20870]                                                                       | -1.226774033 | 2.471293968  | 7.971104388 | 0.004752993 | 0.036547873 | 3.118718315  | 3.129558609  | 1.644577544  | 0.894716898  | 2.32547185   |
| ENSG00000246985 | SOCS2-AS1     | SOCS2 antisense RNA 1 [Source:HGNC Symbol;Acc:27054]                                                                                                      | 1.419758467  | 0.804697986  | 7.971818317 | 0.004751119 | 0.036547873 | 0.365960855  | 0.527293245  | 1.285196495  | 0.434658742  | 0.973207307  |
| ENSG00000100979 | PLTP          | phospholipid transfer protein [Source:HGNC Symbol;Acc:9093]                                                                                               | -1.315349271 | 2.421758282  | 7.966585023 | 0.004764875 | 0.036607167 | 3.312530659  | 2.905015959  | 0.9100098    | 1.508271876  | 2.120832889  |
| ENSG00000248166 | AC008984.2    |                                                                                                                                                           | 1.635681938  | 1.536040682  | 7.96671316  | 0.004764538 | 0.036607167 | 0.401371743  | 1.109650305  | 0.505333341  | 2.066427005  | 2.363133567  |
| ENSG00000230191 | RP4-725G10.3  |                                                                                                                                                           | 1.700508333  | -0.107316299 | 7.949798637 | 0.004809273 | 0.036932101 | -1.034594152 | -0.355038393 | -0.390491059 | 0.335717742  | 0.095393329  |
| ENSG00000232549 | SRD5A1P1      | steroid-5-alpha-reductase, alpha polypeptide 1 pseudogene 1 (3-oxo-5 alpha-steroid delta 4-dehydrogenase alpha pseudogene) [Source:HGNC Symbol;Acc:11286] | 1.358703693  | 2.029556993  | 7.94810887  | 0.004813765 | 0.036950437 | 1.361587606  | 1.620737955  | 1.992811462  | 2.444318394  | 2.3444256    |
| ENSG00000224066 | RP4-622L5.7   |                                                                                                                                                           | 1.626615112  | 0.686392001  | 7.946811362 | 0.004817218 | 0.036960777 | -0.489407866 | 0.555709266  | 1.550698027  | 0.556835562  | 0.264147325  |
| ENSG00000167566 | NCKAP5L       | NCK-associated protein 5-like [Source:HGNC Symbol;Acc:29321]                                                                                              | 1.110749826  | 5.216280293  | 7.945156857 | 0.004821624 | 0.036978422 | 4.307304582  | 4.864677616  | 4.957176402  | 5.895369469  | 5.525933363  |
| ENSG00000183307 | CECR6         | cat eye syndrome chromosome region, candidate 6 [Source:HGNC Symbol;Acc:1844]                                                                             | 1.300359025  | 2.816222091  | 7.944283766 | 0.004823951 | 0.036980111 | 1.148882041  | 2.208959833  | 2.80743594   | 2.762662248  | 3.843827185  |

|                 |               |                                                                                                               |              |              |             |             |             |              |              |              |              |              |
|-----------------|---------------|---------------------------------------------------------------------------------------------------------------|--------------|--------------|-------------|-------------|-------------|--------------|--------------|--------------|--------------|--------------|
| ENSG00000253676 | TAGLN2P1      | transgelin 2 pseudogene 1 [Source:HGNC Symbol;Acc:21739]                                                      | 1.129818386  | 7.376817317  | 7.940532268 | 0.004833961 | 0.037040678 | 6.793597635  | 6.985526048  | 7.30510805   | 8.016314125  | 7.459651659  |
| ENSG00000111199 | TRPV4         | transient receptor potential cation channel, subfamily V, member 4 [Source:HGNC Symbol;Acc:18083]             | 1.463851495  | 1.036211682  | 7.931385927 | 0.004858457 | 0.037212086 | 0.292419846  | 1.16603322   | 1.598401271  | 0.962608982  | 0.615745481  |
| ENSG00000182048 | TRPC2         | transient receptor potential cation channel, subfamily C, member 2, pseudogene [Source:HGNC Symbol;Acc:12334] | 1.561723449  | 0.108126774  | 7.930598994 | 0.00486057  | 0.037212086 | -0.250832646 | 0.056395802  | -0.740035668 | 0.301169826  | 0.485200289  |
| ENSG00000104763 | ASAH1         | N-acylsphingosine amidohydrolase (acid ceramidase) 1 [Source:HGNC Symbol;Acc:735]                             | 1.229926946  | 8.064206839  | 7.916462208 | 0.004898697 | 0.037454977 | 6.921443401  | 7.486694125  | 8.003191697  | 8.75834514   | 8.44212934   |
| ENSG00000137449 | CPEB2         | cytoplasmic polyadenylation element binding protein 2 [Source:HGNC Symbol;Acc:21745]                          | 1.069115371  | 4.592637933  | 7.911227999 | 0.004912891 | 0.03754299  | 4.099324826  | 4.109878245  | 4.633813507  | 5.189791339  | 4.622495289  |
| ENSG0000023261  | LINC00264     | long intergenic non-protein coding RNA 264 [Source:HGNC Symbol;Acc:17776]                                     | 1.47741347   | 0.718738732  | 7.910640946 | 0.004914485 | 0.03754299  | 0.214927798  | 0.133828548  | 0.805492218  | 1.348272594  | 0.485200289  |
| ENSG00000236409 | NRADDP        | neurotrophin receptor associated death domain, pseudogene [Source:HGNC Symbol;Acc:19337]                      | 1.694123971  | 0.274490961  | 7.902278581 | 0.004937256 | 0.037700538 | -0.306880589 | -0.355038393 | -0.390491059 | 0.940331404  | 0.584199832  |
| ENSG00000247121 | CTD-2260A17.2 | Uncharacterized protein [Source:UniProtKB/TrEMBL;Acc:D6RER1]                                                  | 1.353574586  | 1.407303487  | 7.895465088 | 0.004955889 | 0.037826364 | 0.92386066   | 1.03087254   | 1.718398126  | 1.493047208  | 1.564363944  |
| ENSG00000089169 | RPH3A         | rabphilin 3A homolog (mouse) [Source:HGNC Symbol;Acc:17056]                                                   | 1.197940245  | 3.722741211  | 7.894510455 | 0.004958506 | 0.037829886 | 2.082327188  | 3.189723558  | 3.730177502  | 3.805624207  | 4.653223332  |
| ENSG00000187068 | C3orf70       | chromosome 3 open reading frame 70 [Source:HGNC Symbol;Acc:33731]                                             | -2.183073327 | -0.021104023 | 7.874395158 | 0.005013964 | 0.038236375 | 1.210071084  | 0.947543428  | -7.002070102 | -2.670141381 | -2.274700861 |
| ENSG00000255847 | RP11-167N4.2  |                                                                                                               | 1.291248553  | 2.986059845  | 7.872960401 | 0.005017944 | 0.038250109 | 2.217603867  | 2.796091168  | 4.060477069  | 2.935925879  | 1.774613685  |
| ENSG00000107954 | NEURL1        | neutralized E3 ubiquitin protein ligase 1 [Source:HGNC Symbol;Acc:7761]                                       | 1.218964437  | 3.495497481  | 7.868780444 | 0.005029556 | 0.038321988 | 2.863368893  | 3.281905652  | 3.559912356  | 4.468292652  | 2.363133567  |
| ENSG00000236279 | CLEC2L        | C-type lectin domain family 2, member L [Source:HGNC Symbol;Acc:21969]                                        | 1.923764135  | -0.169918767 | 7.864305324 | 0.005042019 | 0.038400282 | -1.921450438 | 0.277241192  | -0.329705368 | 0.335717742  | -0.726511138 |
| ENSG00000114859 | CLCN2         | chloride channel, voltage-sensitive 2 [Source:HGNC Symbol;Acc:2020]                                           | -1.156025925 | 2.811049202  | 7.863458246 | 0.005044382 | 0.038401616 | 3.628640226  | 3.457831828  | 2.051115931  | 1.820287937  | 1.908000984  |
| ENSG00000111863 | ADTRP         | androgen-dependent TFPI-regulating protein [Source:HGNC Symbol;Acc:21214]                                     | 1.16556131   | 3.33314078   | 7.860919863 | 0.005051469 | 0.038405601 | 2.6444045    | 3.336153071  | 4.283583984  | 3.459040145  | 1.71760268   |
| ENSG00000258539 | RP11-121J0.3  |                                                                                                               | 1.692969776  | 0.270830507  | 7.861098953 | 0.005050968 | 0.038405601 | 0.292419846  | -0.782968247 | -0.161352853 | 0.871357159  | 0.303422373  |
| ENSG00000230633 | RP11-37E23.5  |                                                                                                               | 1.989296349  | 0.519374006  | 7.861680966 | 0.005049343 | 0.038405601 | -0.625332215 | 0.056395802  | -0.589913612 | 1.446384807  | 0.84598249   |
| ENSG00000107736 | CDH23         | cadherin-related 23 [Source:HGNC Symbol;Acc:13733]                                                            | 1.085278063  | 5.629898052  | 7.858649195 | 0.005057817 | 0.038437216 | 4.438804034  | 5.536736313  | 6.289824767  | 6.137350316  | 4.93381112   |
| ENSG00000203644 | AC083799.1    |                                                                                                               | 1.179309438  | 3.297910008  | 7.857458059 | 0.00506115  | 0.038445904 | 2.70942011   | 3.081507914  | 3.455848046  | 3.72971886   | 3.27086176   |
| ENSG00000234271 | RP1-138B7.4   |                                                                                                               | -1.316437031 | 1.872625311  | 7.852168196 | 0.00507598  | 0.038541877 | 2.730456787  | 2.671789775  | 1.007464306  | 0.466186565  | 0.676839958  |
| ENSG00000218976 | RP11-528A10.1 |                                                                                                               | 1.199287828  | 2.8225333    | 7.846006116 | 0.00509331  | 0.038640045 | 2.227502762  | 2.409108576  | 2.873554121  | 3.323596289  | 2.956635145  |
| ENSG00000241399 | CD302         | CD302 molecule [Source:HGNC Symbol;Acc:30843]                                                                 | 1.168357637  | 7.078176121  | 7.841387547 | 0.00510634  | 0.038722157 | 5.73852217   | 6.694297439  | 7.011518501  | 7.666677194  | 7.54072126   |
| ENSG00000110077 | MS4A6A        | membrane-spanning 4-domains, subfamily A, member 6A [Source:HGNC Symbol;Acc:13375]                            | 1.36675347   | 8.181933029  | 7.839983573 | 0.005110307 | 0.03873551  | 6.894514061  | 7.551182629  | 7.907412197  | 9.005771024  | 8.611347923  |
| ENSG00000163171 | CDC42EP3      | CDC42 effector protein (Rho GTPase binding) 3 [Source:HGNC Symbol;Acc:16943]                                  | 1.109952447  | 7.624632271  | 7.833248342 | 0.005129384 | 0.038863327 | 6.812628406  | 7.007872409  | 7.724463834  | 8.483066949  | 7.459923264  |
| ENSG00000174130 | TLR6          | toll-like receptor 6 [Source:HGNC Symbol;Acc:16711]                                                           | 1.044947035  | 5.163122463  | 7.832310177 | 0.005132047 | 0.038866729 | 4.620693019  | 4.510911363  | 4.98884424   | 5.592899069  | 5.685880671  |
| ENSG00000230551 | CTB-89H12.4   |                                                                                                               | 1.189233325  | 4.367910816  | 7.830154265 | 0.005138171 | 0.038896334 | 3.563702116  | 4.229353564  | 4.361684071  | 5.199203364  | 3.912116199  |
| ENSG00000147416 | ATP6V1B2      | ATPase, H+ transporting, lysosomal 56/58kDa, V1 subunit B2 [Source:HGNC Symbol;Acc:854]                       | 1.13240628   | 7.511957526  | 7.827645284 | 0.005145309 | 0.038921417 | 6.460091999  | 7.016842685  | 7.480306413  | 8.186862768  | 7.812790416  |
| ENSG00000189423 | USP32P3       | ubiquitin specific peptidase 32 pseudogene 3 [Source:HGNC Symbol;Acc:43576]                                   | 1.80581802   | 0.439374854  | 7.82743088  | 0.005145919 | 0.038921417 | -0.425964666 | 0.438524285  | -0.589913612 | 1.39816257   | 0.095393329  |
| ENSG00000095383 | TBC1D2        | TBC1 domain family, member 2 [Source:HGNC Symbol;Acc:18026]                                                   | 1.089516435  | 5.084181377  | 7.81445409  | 0.005183    | 0.039151277 | 4.136575339  | 4.612468678  | 4.740423765  | 5.691228542  | 5.611549358  |
| ENSG00000167618 | LAIR2         | leukocyte-associated immunoglobulin-like receptor 2 [Source:HGNC Symbol;Acc:6478]                             | 1.484255734  | 0.401434303  | 7.814644727 | 0.005182453 | 0.039151277 | -0.250832646 | 0.016063025  | 0.28980717   | 0.074465887  | 1.155968757  |
| ENSG00000099338 | CATSPERG      | catsper channel auxiliary subunit gamma [Source:HGNC Symbol;Acc:25243]                                        | 1.334455053  | 1.484353353  | 7.81104615  | 0.005192783 | 0.039208307 | 1.249467958  | 1.255368251  | 1.919585805  | 1.820287937  | 0.706443614  |
| ENSG00000143622 | RIT1          | Ras-like without CAAX 1 [Source:HGNC Symbol;Acc:10023]                                                        | 1.029026118  | 5.710623492  | 7.809011811 | 0.005198632 | 0.039235594 | 4.985454998  | 5.155532961  | 5.500773002  | 6.318839493  | 6.111506134  |
| ENSG00000173918 | C1QTNF1       | C1q and tumor necrosis factor related protein 1 [Source:HGNC Symbol;Acc:14324]                                | -2.323983033 | -0.065174572 | 7.806287969 | 0.005206474 | 0.039256179 | 1.268770164  | 0.610915408  | -2.539967122 | -7.002070102 | -1.42520211  |
| ENSG00000154654 | NCAM2         | neural cell adhesion molecule 2 [Source:HGNC Symbol;Acc:7657]                                                 | -1.902896378 | -0.474848891 | 7.805734804 | 0.005208068 | 0.039256179 | 0.597320328  | 0.207316148  | -2.539967122 | -2.97427061  | -1.55968627  |

|                 |               |                                                                                                              |              |              |             |             |             |              |              |              |              |              |
|-----------------|---------------|--------------------------------------------------------------------------------------------------------------|--------------|--------------|-------------|-------------|-------------|--------------|--------------|--------------|--------------|--------------|
| ENSG00000186868 | MAPT          | microtubule-associated protein tau [Source:HGNC Symbol;Acc:6893]                                             | 1.607296077  | -0.071970921 | 7.807190467 | 0.005203875 | 0.039256179 | -0.489407866 | 0.056395802  | 0.570569237  | -1.042179808 | -0.376928291 |
| ENSG00000215244 | RP11-563J2.2  |                                                                                                              | 1.506043271  | 0.611819528  | 7.802971171 | 0.00521604  | 0.039299389 | 0.46968809   | 0.095631612  | 0.6928072    | 0.773941511  | 0.676839958  |
| ENSG00000119227 | PIGZ          | phosphatidylinositol glycan anchor biosynthesis, class Z [Source:HGNC Symbol;Acc:30596]                      | 1.545651509  | 1.377359065  | 7.801327195 | 0.005220787 | 0.039318285 | 0.848890306  | 1.050973916  | 0.959559782  | 2.175352965  | 1.239342106  |
| ENSG00000119121 | TRPM6         | transient receptor potential cation channel, subfamily M, member 6 [Source:HGNC Symbol;Acc:17995]            | 2.048479963  | 1.043530256  | 7.796492955 | 0.00523347  | 0.039380014 | 0.46968809   | -2.076136033 | -0.271377577 | 1.477660161  | 2.276968566  |
| ENSG00000213073 | RP11-288H12.3 |                                                                                                              | 1.491305204  | 2.767448121  | 7.791463887 | 0.005249365 | 0.03946578  | 2.146341971  | 2.01793956   | 2.273120332  | 3.854096116  | 2.578558393  |
| ENSG00000211593 | IGKJ5         | immunoglobulin kappa joining 5 [Source:HGNC Symbol;Acc:5723]                                                 | -1.477327069 | 1.620409624  | 7.788486059 | 0.005258024 | 0.039507354 | 2.629549878  | 1.634124584  | 0.602113338  | 0.847612951  | 1.318159404  |
| ENSG00000165029 | ABCA1         | ATP-binding cassette, sub-family A (ABCI), member 1 [Source:HGNC Symbol;Acc:29]                              | 1.151888392  | 4.044620277  | 7.788014806 | 0.005259395 | 0.039507354 | 3.284356125  | 3.216667762  | 3.733742023  | 4.544115616  | 4.732701701  |
| ENSG00000145780 | FEM1C         | fem-1 homolog c (C. elegans) [Source:HGNC Symbol;Acc:16933]                                                  | 1.057522256  | 5.042732626  | 7.785865782 | 0.005265655 | 0.039537457 | 4.692133273  | 4.576518077  | 5.103490805  | 5.726643757  | 4.780457779  |
| ENSG00000206573 | SETD5-AS1     | SETD5 antisense RNA 1 [Source:HGNC Symbol;Acc:44478]                                                         | 1.01822561   | 4.08866944   | 7.782852797 | 0.005274444 | 0.039569601 | 3.487487892  | 3.93973528   | 4.435772465  | 4.408690123  | 3.940421563  |
| ENSG00000163694 | RBM47         | RNA binding motif protein 47 [Source:HGNC Symbol;Acc:30358]                                                  | 1.114553387  | 5.635249203  | 7.775668899 | 0.00529546  | 0.039697167 | 4.582637211  | 4.983179535  | 5.150919272  | 6.356656489  | 6.232174554  |
| ENSG00000259330 | LINC00984     | long intergenic non-protein coding RNA 984 [Source:HGNC Symbol;Acc:35165]                                    | 1.305219221  | 3.875779478  | 7.775494841 | 0.005295971 | 0.039697167 | 3.080997749  | 3.502308971  | 3.515045984  | 4.640538067  | 4.082663797  |
| ENSG00000254331 | CKS1BP7       | CDC28 protein kinase regulatory subunit 1B pseudogene 7 [Source:HGNC Symbol;Acc:1999]                        | -1.438101532 | 0.959423432  | 7.76998508  | 0.005312149 | 0.039801439 | 1.957037891  | 1.449588786  | -0.520331194 | -0.46496394  | 0.485200289  |
| ENSG00000131379 | C3orf20       | chromosome 3 open reading frame 20 [Source:HGNC Symbol;Acc:25320]                                            | 1.461791035  | 0.259750232  | 7.768161038 | 0.005317516 | 0.039824654 | -0.14487434  | 0.498306264  | 0.602113338  | 0.402426505  | -0.894110176 |
| ENSG00000105371 | ICAM4         | intercellular adhesion molecule 4 (Landsteiner-Wiener blood group) [Source:HGNC Symbol;Acc:5347]             | -1.118070855 | 3.480748308  | 7.762226105 | 0.005335017 | 0.039937134 | 4.213299382  | 4.227146839  | 2.548775847  | 2.935925879  | 2.236956541  |
| ENSG00000182625 | RP11-123C21.1 |                                                                                                              | 1.48763856   | 0.642383838  | 7.761526167 | 0.005337084 | 0.039937134 | -0.094677427 | -0.068151468 | 0.328039018  | 1.0274492    | 1.239342106  |
| ENSG00000105963 | ADAP1         | ArfGAP with dual PH domains 1 [Source:HGNC Symbol;Acc:16486]                                                 | 1.170746332  | 4.56538561   | 7.755088318 | 0.005356142 | 0.040028556 | 3.743472659  | 4.102674026  | 4.218927114  | 5.320598436  | 4.855046691  |
| ENSG00000006534 | ALDH3B1       | aldehyde dehydrogenase 3 family, member B1 [Source:HGNC Symbol;Acc:410]                                      | 1.09570381   | 6.081121015  | 7.748325852 | 0.005376236 | 0.040161625 | 5.231559854  | 5.715811808  | 5.863287843  | 6.879993772  | 6.171775716  |
| ENSG00000104067 | TJP1          | tight junction protein 1 [Source:HGNC Symbol;Acc:11827]                                                      | -3.19826732  | -0.693484675 | 7.745786988 | 0.005383799 | 0.04016685  | 0.502670228  | 0.207316148  | -7.002070102 | -4.730697034 | -2.526883755 |
| ENSG00000131470 | PSMC3IP       | PSMC3 interacting protein [Source:HGNC Symbol;Acc:17928]                                                     | -1.290229393 | 2.214270661  | 7.746269198 | 0.005382362 | 0.04016685  | 2.798442909  | 2.759912177  | 0.721814282  | 1.314027603  | 2.334979851  |
| ENSG00000205181 | LINC00654     | long intergenic non-protein coding RNA 654 [Source:HGNC Symbol;Acc:27154]                                    | 1.53550354   | 1.407324469  | 7.746433809 | 0.005381871 | 0.04016685  | 0.686141241  | 0.925936776  | 1.098750223  | 2.33756225   | 1.177268129  |
| ENSG00000050555 | LAMC3         | laminin, gamma 3 [Source:HGNC Symbol;Acc:6494]                                                               | 1.881793876  | -0.222945037 | 7.728655815 | 0.00543512  | 0.040532509 | -1.608074432 | 0.407677918  | 0.721814282  | -1.042179808 | -2.274700861 |
| ENSG00000108861 | DUSP3         | dual specificity phosphatase 3 [Source:HGNC Symbol;Acc:3069]                                                 | 1.072131628  | 6.118753606  | 7.726793933 | 0.005440727 | 0.0405571   | 5.066276063  | 5.423727308  | 5.666596748  | 6.677294827  | 6.878112447  |
| ENSG00000227295 | ELL2P1        | elongation factor, RNA polymerase II, 2 pseudogene 1 [Source:HGNC Symbol;Acc:39343]                          | -1.117505598 | 3.313393007  | 7.725777733 | 0.00544379  | 0.040562709 | 3.909466259  | 3.881994713  | 2.292585253  | 2.580193821  | 3.130499786  |
| ENSG00000166900 | STX3          | syntaxin 3 [Source:HGNC Symbol;Acc:11438]                                                                    | 1.073381583  | 5.860244558  | 7.715886138 | 0.005473699 | 0.040768255 | 5.008602417  | 5.302156613  | 5.534884824  | 6.563929961  | 6.277257837  |
| ENSG00000245213 | RP11-10K16.1  |                                                                                                              | 1.449655988  | 0.777302379  | 7.714070637 | 0.005479206 | 0.040791968 | 0.292419846  | 0.664086661  | 0.602113338  | 1.048430793  | 0.923655414  |
| ENSG00000121211 | MND1          | meiotic nuclear divisions 1 homolog (S. cerevisiae) [Source:HGNC Symbol;Acc:24839]                           | -1.66779886  | 0.817021319  | 7.710494618 | 0.005490071 | 0.040855528 | 1.858558824  | 1.403429499  | -1.202308962 | -2.670141381 | 0.735452007  |
| ENSG00000185155 | MIXL1         | Mix paired-like homeobox [Source:HGNC Symbol;Acc:13363]                                                      | -2.10471217  | -0.084861063 | 7.703554497 | 0.005511219 | 0.040983158 | 1.397104685  | 0.056395802  | -3.233942493 | -2.670141381 | -0.9858258   |
| ENSG00000163739 | CXCL1         | chemokine (C-X-C motif) ligand 1 (melanoma growth stimulating activity, alpha) [Source:HGNC Symbol;Acc:4602] | 2.887807383  | 2.217509802  | 7.703334587 | 0.00551189  | 0.040983158 | 1.127895066  | -1.763731145 | -0.589913612 | 3.597162784  | 2.950462792  |
| ENSG00000248281 | RP11-174E22.2 |                                                                                                              | 1.393562436  | 2.357910413  | 7.700316452 | 0.005521114 | 0.041034363 | 1.593595892  | 1.699255595  | 1.956663165  | 2.930285084  | 2.925505868  |
| ENSG00000054598 | FOXC1         | forkhead box C1 [Source:HGNC Symbol;Acc:3800]                                                                | -1.797621437 | -0.028355138 | 7.696730513 | 0.005532094 | 0.041098568 | 1.343495699  | 0.498306264  | -2.287883461 | -2.205328685 | -2.060109799 |
| ENSG00000117151 | CTBS          | chitinase, di-N-acetyl- [Source:HGNC Symbol;Acc:2496]                                                        | 1.007997746  | 5.215371218  | 7.690764911 | 0.00555041  | 0.041217193 | 4.574904087  | 4.828743922  | 5.145577126  | 5.700371331  | 5.518650873  |
| ENSG00000031081 | ARHGAP31      | Rho GTPase activating protein 31 [Source:HGNC Symbol;Acc:29216]                                              | 1.01350518   | 5.417063168  | 7.689125345 | 0.005555454 | 0.041235081 | 4.679568409  | 5.005240075  | 5.329963542  | 6.123204694  | 5.513426495  |
| ENSG00000228624 | RP3-399L15.3  |                                                                                                              | 1.680253311  | -0.324593365 | 7.688455609 | 0.00557516  | 0.041235081 | -1.132483902 | -0.713501401 | -1.315629595 | 0.114810932  | 0.223773082  |
| ENSG00000146828 | SLC12A9       | solute carrier family 12, member 9 [Source:HGNC Symbol;Acc:17435]                                            | 1.028008309  | 7.263794152  | 7.684314659 | 0.005570283 | 0.041294897 | 6.282751708  | 6.707021551  | 7.249856471  | 7.832349215  | 7.684322605  |

|                 |               |                                                                                           |              |              |             |             |             |              |              |              |              |              |
|-----------------|---------------|-------------------------------------------------------------------------------------------|--------------|--------------|-------------|-------------|-------------|--------------|--------------|--------------|--------------|--------------|
| ENSG00000087589 | CASS4         | Cas scaffolding protein family member 4 [Source:HGNC Symbol;Acc:15878]                    | 1.079078082  | 3.456743638  | 7.681144828 | 0.005580076 | 0.041332586 | 2.651774847  | 3.251828018  | 3.833458626  | 3.635799812  | 3.601447293  |
| ENSG00000168615 | ADAM9         | ADAM metallopeptidase domain 9 [Source:HGNC Symbol;Acc:216]                               | 1.128208982  | 4.933470056  | 7.681196704 | 0.005579915 | 0.041332586 | 3.924757494  | 4.347834625  | 4.424788612  | 5.460230859  | 5.685880671  |
| ENSG00000160183 | TMPPRS3       | transmembrane protease, serine 3 [Source:HGNC Symbol;Acc:11877]                           | 1.617362614  | 0.461628894  | 7.677701865 | 0.005590732 | 0.041394054 | -0.196880952 | 0.583576386  | 1.415193986  | -0.296766077 | -0.376928291 |
| ENSG00000267478 | RP11-815J4.5  |                                                                                           | 1.097585751  | 3.858507606  | 7.663319298 | 0.005635473 | 0.041707728 | 3.36279692   | 3.516835107  | 3.895241519  | 4.448697471  | 3.78607572   |
| ENSG00000238142 | RP11-108M9.4  |                                                                                           | 1.503801352  | 2.214269103  | 7.662175527 | 0.005639047 | 0.041716589 | 1.57820595   | 1.673554946  | 1.732719555  | 3.065082826  | 2.334979851  |
| ENSG00000102554 | KLF5          | Kruppel-like factor 5 (intestinal) [Source:HGNC Symbol;Acc:6349]                          | 1.59515714   | 2.435298075  | 7.658420248 | 0.005650796 | 0.041768306 | 1.871242652  | 1.912023327  | 1.842443831  | 3.516638688  | 2.098677261  |
| ENSG00000273018 | CTD-2303H24.2 |                                                                                           | 1.551384079  | 2.028940448  | 7.657482824 | 0.005653733 | 0.041772426 | 0.714573228  | 2.01793956   | 2.085000104  | 2.697741416  | 1.882291923  |
| ENSG00000225358 | MIPEPP1       | mitochondrial intermediate peptidase pseudogene 1 [Source:HGNC Symbol;Acc:39456]          | -1.326104003 | 1.822925461  | 7.653937135 | 0.005664856 | 0.041828827 | 2.504862786  | 2.632310473  | 1.163613388  | 0.229488395  | 1.06748014   |
| ENSG00000172123 | SLFN12        | schlafen family member 12 [Source:HGNC Symbol;Acc:25500]                                  | 1.142701248  | 3.783811837  | 7.653530629 | 0.005666132 | 0.041828827 | 3.064524914  | 3.372548695  | 3.679326777  | 4.178250168  | 4.245284812  |
| ENSG00000130066 | SAT1          | spermidine/spermine N1-acetyltransferase 1 [Source:HGNC Symbol;Acc:10540]                 | 1.887591653  | 9.342876785  | 7.647741667 | 0.005684344 | 0.041928006 | 7.99911617   | 7.824935792  | 8.041086484  | 10.66607203  | 9.774284812  |
| ENSG00000119042 | SATB2         | SATB homeobox 2 [Source:HGNC Symbol;Acc:21637]                                            | 1.522067649  | 0.766894264  | 7.64079052  | 0.00570629  | 0.042054546 | 0.254194054  | 0.376157587  | 0.036330944  | 1.314027603  | 1.155968757  |
| ENSG00000272040 | CTC-366B18.4  |                                                                                           | 1.523350013  | -0.068334766 | 7.638866974 | 0.005712379 | 0.04208175  | -0.625332215 | -0.713501401 | 0.328039018  | -0.053815412 | 0.04992943   |
| ENSG00000099139 | PCSK5         | proprotein convertase subtilisin/kexin type 5 [Source:HGNC Symbol;Acc:8747]               | 1.013713279  | 4.278961546  | 7.634937166 | 0.005724838 | 0.042155843 | 3.437191842  | 4.031113272  | 4.802839979  | 4.519907545  | 4.230078009  |
| ENSG00000108352 | RAPGEFL1      | Rap guanine nucleotide exchange factor (GEF)-like 1 [Source:HGNC Symbol;Acc:17428]        | 1.305840081  | 2.581125667  | 7.633614117 | 0.005729039 | 0.042169089 | 2.103982592  | 1.986973075  | 2.430758609  | 3.275467173  | 2.656461736  |
| ENSG00000107815 | C10orf2       | chromosome 10 open reading frame 2 [Source:HGNC Symbol;Acc:1160]                          | -1.126042874 | 4.151004819  | 7.626915143 | 0.005750357 | 0.042290542 | 4.825203682  | 4.670464478  | 3.963622948  | 2.818693563  | 3.59354719   |
| ENSG00000169087 | HSPBAP1       | HSPB (heat shock 27kDa) associated protein 1 [Source:HGNC Symbol;Acc:16389]               | 1.080978165  | 4.409098803  | 7.622683307 | 0.005763866 | 0.04236872  | 3.948891281  | 4.018408312  | 4.352439515  | 5.053734345  | 4.368453247  |
| ENSG00000205560 | CPT1B         | carnitine palmitoyltransferase 1B (muscle) [Source:HGNC Symbol;Acc:2329]                  | 1.388387542  | 0.668396048  | 7.601904907 | 0.005830667 | 0.042809432 | 0.292419846  | 0.468724906  | 1.053829154  | 0.61425099   | 0.551948963  |
| ENSG00000106268 | NUDT1         | nudix (nucleoside diphosphate linked moiety X)-type motif 1 [Source:HGNC Symbol;Acc:8048] | -1.059365974 | 3.69527062   | 7.599145359 | 0.005839597 | 0.042849668 | 4.074859969  | 4.312884512  | 2.800654358  | 2.952717131  | 3.704069251  |
| ENSG00000167112 | TRUB2         | TruB pseudouridine (psi) synthase family member 2 [Source:HGNC Symbol;Acc:17170]          | -1.053962334 | 4.085307615  | 7.598703575 | 0.005841029 | 0.042849668 | 4.755078638  | 4.476025242  | 3.71943079   | 2.895969157  | 3.880000416  |
| ENSG00000261269 | RP11-389C8.2  |                                                                                           | 1.709784556  | 0.322210597  | 7.595002464 | 0.005853032 | 0.042919786 | -0.856736938 | -0.252938016 | -0.390491059 | 0.847612951  | 1.021113618  |
| ENSG00000138119 | MYOF          | myoferlin [Source:HGNC Symbol;Acc:3656]                                                   | 1.080237239  | 5.226286207  | 7.579184795 | 0.005904614 | 0.043225811 | 4.154846016  | 4.917638154  | 5.086863926  | 5.975607843  | 5.390010002  |
| ENSG00000229140 | CCDC26        | coiled-coil domain containing 26 [Source:HGNC Symbol;Acc:28416]                           | -1.867357893 | -0.053495967 | 7.576825492 | 0.005912347 | 0.043264383 | 1.063037713  | 0.836121102  | -2.845623393 | -2.97427061  | -1.42520211  |
| ENSG00000166510 | CCDC68        | coiled-coil domain containing 68 [Source:HGNC Symbol;Acc:24350]                           | 1.543431711  | -0.112763678 | 7.570550835 | 0.005932965 | 0.043397167 | -0.306880589 | 0.242702272  | -0.453950945 | 0.434658742  | -2.060109799 |
| ENSG00000166741 | NNMT          | nicotinamide N-methyltransferase [Source:HGNC Symbol;Acc:7861]                            | -2.697344812 | 0.03326299   | 7.569491973 | 0.005936451 | 0.043404584 | 1.766505254  | 0.207316148  | -3.766908349 | -4.730697034 | -2.526883755 |
| ENSG00000226535 | RP11-417L14.1 |                                                                                           | -1.198092848 | 2.723701584  | 7.565626529 | 0.005949197 | 0.043479664 | 3.571495355  | 3.225538486  | 1.674560554  | 1.86827773   | 2.216526545  |
| ENSG00000234961 | RP11-124N14.3 |                                                                                           | 1.580443006  | 0.019778585  | 7.559717809 | 0.005968734 | 0.043604295 | -1.132483902 | -0.157588231 | 0.401591237  | -0.053815412 | 0.223773082  |
| ENSG00000102471 | NDFIP2        | Nedd4 family interacting protein 2 [Source:HGNC Symbol;Acc:18537]                         | -1.177051243 | 2.544979775  | 7.557092812 | 0.005977434 | 0.04364969  | 3.191323731  | 3.216667762  | 1.868618824  | 1.12943269   | 2.206202022  |
| ENSG00000114948 | ADAM23        | ADAM metallopeptidase domain 23 [Source:HGNC Symbol;Acc:202]                              | 1.610781448  | 1.414146983  | 7.549956095 | 0.006001154 | 0.043804679 | 0.174562846  | 1.237938318  | 2.448220886  | 0.773941511  | 1.279288931  |
| ENSG00000221821 | C6orf226      | chromosome 6 open reading frame 226 [Source:HGNC Symbol;Acc:34431]                        | 1.204486455  | 2.329662303  | 7.547817236 | 0.006008281 | 0.043838476 | 2.093195522  | 1.955327308  | 2.548775847  | 2.629760944  | 2.226777706  |
| ENSG00000253239 | IGLVI-70      | immunoglobulin lambda variable (I)-70 (pseudogene) [Source:HGNC Symbol;Acc:5940]          | -1.681331022 | 0.228967283  | 7.546667288 | 0.006012117 | 0.043848238 | 1.32517403   | 0.637745977  | -1.57307192  | -2.205328685 | -0.045536284 |
| ENSG00000136630 | HLX           | H2.0-like homeobox [Source:HGNC Symbol;Acc:4978]                                          | 1.082645766  | 4.31379131   | 7.543102503 | 0.006024023 | 0.043916826 | 3.687198663  | 3.392378661  | 3.939130343  | 4.826634759  | 5.004033918  |
| ENSG00000132205 | EMILIN2       | elastin microfibril interfacier 2 [Source:HGNC Symbol;Acc:19881]                          | 1.107516973  | 7.311635358  | 7.53935786  | 0.006036555 | 0.043953458 | 6.003395125  | 6.716491526  | 7.056332609  | 7.956694083  | 7.926037372  |
| ENSG00000175294 | CATSPER1      | cation channel, sperm associated 1 [Source:HGNC Symbol;Acc:17116]                         | 1.389077817  | 2.260798737  | 7.539356846 | 0.006036559 | 0.043953458 | 1.57820595   | 1.647388141  | 1.932051102  | 3.065082826  | 2.426764636  |
| ENSG00000212743 | DKFZP667F0711 |                                                                                           | 1.586638858  | -0.121618055 | 7.540564764 | 0.006032513 | 0.043953458 | -0.942926472 | -0.523165112 | -0.329705368 | 0.114810932  | 0.303422373  |
| ENSG00000181649 | PHLDA2        | pleckstrin homology-like domain, family A, member 2 [Source:HGNC Symbol;Acc:12385]        | 2.326515384  | 0.571178613  | 7.538358358 | 0.006039905 | 0.04395959  | -0.094677427 | -0.647226338 | -2.073364206 | 2.02468586   | 0.303422373  |



|                 |               |                                                                                                                               |              |              |             |             |             |              |              |              |              |              |
|-----------------|---------------|-------------------------------------------------------------------------------------------------------------------------------|--------------|--------------|-------------|-------------|-------------|--------------|--------------|--------------|--------------|--------------|
| ENSG00000138095 | LRPPRC        | leucine-rich pentatricopeptide repeat containing [Source:HGNC Symbol;Acc:15714]                                               | -1.030068866 | 7.192725713  | 7.537015826 | 0.006044407 | 0.043974127 | 7.600433037  | 7.643226642  | 7.0188414    | 6.248052403  | 7.039101795  |
| ENSG00000100804 | PSMB5         | proteasome (prosome, macropain) subunit, beta type, 5 [Source:HGNC Symbol;Acc:9542]                                           | -1.009470149 | 4.062709449  | 7.535315753 | 0.006050113 | 0.043982884 | 4.730925147  | 4.48158997   | 3.531522919  | 3.140302572  | 3.806723591  |
| ENSG00000181826 | RELL1         | RELT-like 1 [Source:HGNC Symbol;Acc:27379]                                                                                    | 1.303690489  | 2.46227608   | 7.535164374 | 0.006050622 | 0.043982884 | 1.89628059   | 2.028115757  | 2.386155201  | 3.221064093  | 2.295655991  |
| ENSG00000068793 | CYFIP1        | cytoplasmic FMR1 interacting protein 1 [Source:HGNC Symbol;Acc:13759]                                                         | 1.013048974  | 6.05517865   | 7.531572439 | 0.006062697 | 0.044052419 | 5.042641743  | 5.601204704  | 5.839498562  | 6.705638951  | 6.476726889  |
| ENSG00000140259 | MFAP1         | microfibrillar-associated protein 1 [Source:HGNC Symbol;Acc:7032]                                                             | -1.026106613 | 4.049152701  | 7.517276576 | 0.006111    | 0.044348329 | 4.486986071  | 4.525351572  | 3.595610939  | 2.697741416  | 4.206962975  |
| ENSG00000115318 | LOXL3         | lysyl oxidase-like 3 [Source:HGNC Symbol;Acc:13869]                                                                           | 1.293454129  | 4.025999543  | 7.516167749 | 0.006114763 | 0.0443573   | 3.019655031  | 3.55604389   | 3.519182893  | 4.791286425  | 4.46903248   |
| ENSG00000086548 | CEACAM6       | carcinoembryonic antigen-related cell adhesion molecule 6 (non-specific cross reacting antigen) [Source:HGNC Symbol;Acc:1818] | -1.94923022  | 1.101171704  | 7.515189591 | 0.006118085 | 0.044360002 | 2.125317742  | 1.07079906   | -7.002070102 | -1.042179808 | 1.81594051   |
| ENSG00000135722 | FBXL8         | F-box and leucine-rich repeat protein 8 [Source:HGNC Symbol;Acc:17875]                                                        | 1.248465063  | 2.542018027  | 7.514569977 | 0.006120189 | 0.044360002 | 1.766505254  | 2.270258944  | 3.380537789  | 2.521378548  | 2.164148811  |
| ENSG00000270681 | RP11-372K14.2 |                                                                                                                               | 1.590204997  | 0.431441462  | 7.511133877 | 0.006131876 | 0.044426364 | 0.329658892  | -0.204475541 | 0.505333341  | 1.206127397  | -0.726511138 |
| ENSG00000272520 | CTD-2044J15.2 |                                                                                                                               | 1.307337912  | 1.625520374  | 7.505823162 | 0.006149983 | 0.044520802 | 0.848890306  | 1.202433699  | 1.932051102  | 1.820287937  | 1.895203721  |
| ENSG00000158887 | MPZ           | myelin protein zero [Source:HGNC Symbol;Acc:7225]                                                                             | 1.315771341  | 1.814655607  | 7.502602464 | 0.00616099  | 0.044582103 | 1.084982398  | 1.289608822  | 1.919585805  | 2.346060651  | 1.958084208  |
| ENSG00000250067 | YJEFN3        | Yjef N-terminal domain containing 3 [Source:HGNC Symbol;Acc:24785]                                                            | 1.359191547  | 1.538712562  | 7.498709332 | 0.006174323 | 0.044660171 | 1.018120824  | 1.306429105  | 2.311791045  | 1.12943269   | 1.3928929    |
| ENSG00000272941 | RP11-134L10.1 |                                                                                                                               | 1.325766341  | 1.951373836  | 7.497854614 | 0.006177254 | 0.044662969 | 1.16956809   | 1.620737955  | 1.968813513  | 2.354509285  | 2.236956541  |
| ENSG00000099998 | GGT5          | gamma-glutamyltransferase 5 [Source:HGNC Symbol;Acc:4260]                                                                     | -1.604180592 | 0.787167352  | 7.496883939 | 0.006180584 | 0.044668651 | 2.177314774  | 1.434365866  | -1.57307192  | -1.231517591 | -1.55968627  |
| ENSG00000252620 | RNU6ATAC24P   | RNA, U6atac small nuclear 24, pseudogene [Source:HGNC Symbol;Acc:46923]                                                       | 1.472775951  | 0.10630818   | 7.494701555 | 0.006188079 | 0.044704411 | -0.489407866 | -0.252938016 | 0.505333341  | 0.669468625  | -0.894110176 |
| ENSG00000228393 | LINC01004     | long intergenic non-protein coding RNA 1004 [Source:HGNC Symbol;Acc:48961]                                                    | 1.586911245  | 0.281789141  | 7.489056846 | 0.006207506 | 0.044826313 | 0.254194054  | -0.523165112 | 0.505333341  | -0.009775356 | 0.615745481  |
| ENSG00000110092 | CCND1         | cyclin D1 [Source:HGNC Symbol;Acc:1582]                                                                                       | -1.454572319 | 1.674223278  | 7.47829583  | 0.006244715 | 0.045057941 | 2.931566685  | 2.116608898  | -0.161352853 | 0.58582888   | 0.378903451  |
| ENSG00000203836 | NBPFL24       | neuroblastoma breakpoint family, member 24 [Source:HGNC Symbol;Acc:27299]                                                     | 1.523990329  | 0.388415634  | 7.478931507 | 0.006242511 | 0.045057941 | 0.534915169  | -0.068151468 | 0.721814282  | 0.773941511  | -0.9858258   |
| ENSG00000100504 | PYGL          | phosphorylase, glycogen, liver [Source:HGNC Symbol;Acc:9725]                                                                  | 1.069925274  | 6.745941033  | 7.473670923 | 0.006260777 | 0.045155272 | 5.610096937  | 6.08067153   | 6.308469644  | 7.299481203  | 7.521072175  |
| ENSG00000166145 | SPINT1        | serine peptidase inhibitor, Kunitz type 1 [Source:HGNC Symbol;Acc:11246]                                                      | 1.008818155  | 4.519758636  | 7.471181131 | 0.006269441 | 0.045163434 | 3.628640226  | 4.159324949  | 4.463945173  | 4.853706917  | 5.053825573  |
| ENSG00000130598 | TNNI2         | troponin I type 2 (skeletal, fast) [Source:HGNC Symbol;Acc:11946]                                                             | 1.466729433  | 2.214374997  | 7.469650946 | 0.006274772 | 0.045163434 | 1.32517403   | 1.272590116  | 1.582674799  | 2.924622147  | 2.893690069  |
| ENSG00000205038 | PKHD1L1       | polycystic kidney and hepatic disease 1 (autosomal recessive)-like 1 [Source:HGNC Symbol;Acc:20313]                           | 1.899408815  | 2.196894829  | 7.468754998 | 0.006277895 | 0.045167397 | 0.796654307  | 1.479561055  | 0.570569237  | 3.415289988  | 2.5705316    |
| ENSG00000198150 | AC135178.1    | HCG1985372; Uncharacterized protein; cDNA FLJ37541 fis, clone BRCAN2026340 [Source:UniProtKB/TrEMBL;Acc:Q8N1U9]               | 1.365589291  | 1.031939691  | 7.46546339  | 0.006289384 | 0.045212996 | 0.435934254  | 0.836121102  | 1.855590689  | 1.069111613  | 0.139468177  |
| ENSG00000241370 | RPP21         | ribonuclease P/MRP 21kDa subunit [Source:HGNC Symbol;Acc:21300]                                                               | 1.339446762  | 1.104822168  | 7.462802185 | 0.006298688 | 0.045260071 | 0.796654307  | 0.689955027  | 1.467510679  | 1.582074621  | 0.450630967  |
| ENSG00000163221 | S100A12       | S100 calcium binding protein A12 [Source:HGNC Symbol;Acc:10489]                                                               | 1.347237856  | 6.798791255  | 7.452597695 | 0.006334496 | 0.045444251 | 5.694594263  | 5.939859011  | 5.911295764  | 7.758868473  | 7.378933837  |
| ENSG00000203709 | C1orf132      | chromosome 1 open reading frame 132 [Source:HGNC Symbol;Acc:32018]                                                            | 1.258107485  | 4.156688407  | 7.451552068 | 0.006338177 | 0.045452084 | 3.843412177  | 3.415820346  | 3.975715067  | 5.173171083  | 3.589580856  |
| ENSG00000204420 | C6orf25       | chromosome 6 open reading frame 25 [Source:HGNC Symbol;Acc:13937]                                                             | 1.238120195  | 5.194267403  | 7.449922923 | 0.006343917 | 0.045474665 | 4.115407246  | 4.72152329   | 4.689939282  | 6.145893276  | 5.407013282  |
| ENSG00000273295 | AP000350.5    |                                                                                                                               | 1.601100068  | 0.849885967  | 7.448182464 | 0.006350054 | 0.04550008  | -0.698419327 | 0.637745977  | 1.225685365  | 1.006157955  | 1.155968757  |
| ENSG00000198502 | HLA-DRB5      | major histocompatibility complex, class II, DR beta 5 [Source:HGNC Symbol;Acc:4953]                                           | 1.276392317  | 6.869055241  | 7.447264283 | 0.006353294 | 0.045504724 | 5.365342359  | 5.571941368  | 5.685125903  | 7.275767829  | 8.175136701  |
| ENSG00000254859 | RP11-661A12.5 |                                                                                                                               | 1.524121589  | 1.057778137  | 7.443608789 | 0.006366211 | 0.045578643 | 0.566455146  | 0.836121102  | 0.959559782  | 2.22227058   | -2.274700861 |
| ENSG00000196782 | MAML3         | mastermind-like 3 (Drosophila) [Source:HGNC Symbol;Acc:16272]                                                                 | 1.063821465  | 4.713465058  | 7.43892219  | 0.00638281  | 0.045678857 | 3.55586655   | 4.264209695  | 4.455335096  | 5.350472031  | 5.216979501  |
| ENSG00000177301 | KCNA2         | potassium voltage-gated channel, shaker-related subfamily, member 2 [Source:HGNC Symbol;Acc:6220]                             | 1.531408839  | -0.054642369 | 7.431553041 | 0.006409001 | 0.045791618 | -0.250832646 | 0.095631612  | 0.570569237  | -0.956081001 | -0.649489103 |
| ENSG00000167378 | IRGQ          | immunity-related GTPase family, Q [Source:HGNC Symbol;Acc:24868]                                                              | 1.084321331  | 4.349950261  | 7.425768086 | 0.006429637 | 0.045903858 | 3.918660435  | 3.942428021  | 4.259057675  | 5.188610507  | 3.958987913  |

|                 |                |                                                                                                              |              |              |             |             |             |              |              |              |              |              |
|-----------------|----------------|--------------------------------------------------------------------------------------------------------------|--------------|--------------|-------------|-------------|-------------|--------------|--------------|--------------|--------------|--------------|
| ENSG00000272916 | RP11-574K11.3  | Bifunctional heparan sulfate N-deacetylase/N-sulfotransferase 2 [Source:UniProtKB/TrEMBL;Acc:S4R438]         | 1.895169426  | -0.080107053 | 7.425683559 | 0.006429939 | 0.045903858 | -1.921450438 | 0.376157587  | 0.28980717   | 0.229488395  | -1.083770229 |
| ENSG00000102362 | SYTL4          | synaptotagmin-like 4 [Source:HGNC Symbol;Acc:15588]                                                          | -1.508716051 | 2.529138462  | 7.42029063  | 0.00644924  | 0.046008476 | 3.279606408  | 3.624712133  | -0.271377577 | 1.926103707  | 0.872340852  |
| ENSG00000166682 | TMPPSS5        | transmembrane protease, serine 5 [Source:HGNC Symbol;Acc:14908]                                              | 1.453346791  | 0.026648253  | 7.420124482 | 0.006449835 | 0.046008476 | -0.306880589 | 0.207316148  | -0.059127673 | 0.154058352  | -0.376928291 |
| ENSG00000198682 | PAPSS2         | 3'-phosphoadenosine 5'-phosphosulfate synthase 2 [Source:HGNC Symbol;Acc:8604]                               | 1.187849402  | 2.942744312  | 7.418345016 | 0.006456217 | 0.046016603 | 2.093195522  | 2.865836059  | 3.186096972  | 3.462952422  | 2.693890668  |
| ENSG00000095015 | MAP3K1         | mitogen-activated protein kinase kinase 1, E3 ubiquitin protein ligase [Source:HGNC Symbol;Acc:6848]         | 1.006237645  | 7.413284549  | 7.416767579 | 0.00646188  | 0.046019279 | 6.645948858  | 7.029244774  | 7.678502925  | 8.132325486  | 7.085254968  |
| ENSG00000180871 | CXCR2          | chemokine (C-X-C motif) receptor 2 [Source:HGNC Symbol;Acc:6027]                                             | 1.153748193  | 4.447115437  | 7.417026106 | 0.006460952 | 0.046019279 | 3.774188075  | 3.594215211  | 3.963622948  | 5.031513688  | 5.118566908  |
| ENSG00000165731 | RET            | ret proto-oncogene [Source:HGNC Symbol;Acc:9967]                                                             | 1.429635349  | 0.540780314  | 7.416050236 | 0.006464457 | 0.046019279 | 0.254194054  | 0.583576386  | 0.036330944  | 0.798919003  | 0.615745481  |
| ENSG00000156042 | TTC18          | tetratricopeptide repeat domain 18 [Source:HGNC Symbol;Acc:30726]                                            | 1.303891817  | 1.387166748  | 7.404556889 | 0.006505887 | 0.046276678 | 1.063037713  | 1.202433699  | 2.06249931   | 1.538247531  | 0.415212929  |
| ENSG0000027001  | MIPEP          | mitochondrial intermediate peptidase [Source:HGNC Symbol;Acc:7104]                                           | -1.20366588  | 2.461408994  | 7.402380781 | 0.006513761 | 0.046313924 | 3.265262705  | 3.100920657  | 1.907011864  | 1.006157955  | 1.71760268   |
| ENSG00000254275 | RP11-89M16.1   | ATP-binding cassette, sub-family D (ALD), member 1 [Source:HGNC Symbol;Acc:61]                               | 1.824245891  | 0.64189445   | 7.397948715 | 0.00652983  | 0.046409376 | -0.094677427 | 0.637745977  | 2.171650019  | -0.956081001 | -4.610216385 |
| ENSG00000101986 | ABCD1          | ArfGAP with SH3 domain, ankyrin repeat and PH domain 3 [Source:HGNC Symbol;Acc:14987]                        | 1.007791581  | 5.118248111  | 7.392562491 | 0.006549412 | 0.046529713 | 4.323547566  | 4.848976944  | 5.034357156  | 5.666843359  | 5.356557658  |
| ENSG00000088280 | ASAP3          | ArfGAP with SH3 domain, ankyrin repeat and PH domain 3 [Source:HGNC Symbol;Acc:14987]                        | 1.362288127  | 0.764587205  | 7.390456507 | 0.006557084 | 0.046565379 | 0.627538984  | 0.637745977  | 0.959559782  | 1.069111613  | 0.095393329  |
| ENSG00000168939 | SPRY3          | sprouty homolog 3 (Drosophila) [Source:HGNC Symbol;Acc:11271]                                                | 1.327178976  | 1.509170667  | 7.383842246 | 0.006581242 | 0.046718037 | 1.148882041  | 0.789025519  | 1.842443831  | 1.55300499   | 1.81594051   |
| ENSG00000115271 | GCA            | granule cell-associated calcium binding protein [Source:HGNC Symbol;Acc:15990]                               | 1.056674214  | 6.854864594  | 7.381563071 | 0.006589587 | 0.04675837  | 5.762549857  | 6.144892317  | 6.431546497  | 7.293451993  | 7.716050489  |
| ENSG00000224177 | LINC00570      | long intergenic non-protein coding RNA 570 [Source:HGNC Symbol;Acc:43717]                                    | -2.195408906 | -0.221097885 | 7.380303926 | 0.006594203 | 0.046772212 | 0.597320328  | 0.836121102  | -2.845623393 | -7.002070102 | -0.894110176 |
| ENSG00000224997 | AL049840.1     | Uncharacterized protein; cDNA FLJ53535 [Source:UniProtKB/TrEMBL;Acc:B4DK98]                                  | 1.791161532  | 0.079465802  | 7.379475133 | 0.006597242 | 0.046774873 | -0.196880952 | -0.713501401 | -0.99931534  | 0.984547783  | 0.04992943   |
| ENSG00000269430 | LRR3D3N        | LRR3 downstream neighbor (non-protein coding) [Source:HGNC Symbol;Acc:1270]                                  | 1.530725369  | -0.012518843 | 7.373415318 | 0.00661951  | 0.046913803 | -0.856736938 | -0.112176905 | -0.010608983 | 0.192266291  | 0.095393329  |
| ENSG00000120278 | PLEKHG1        | pleckstrin homology domain containing, family G (with RhoGEF domain) member 1 [Source:HGNC Symbol;Acc:20884] | -1.045837648 | 3.990736015  | 7.371890885 | 0.006625123 | 0.046934641 | 4.659599832  | 4.343766522  | 3.159840379  | 3.47074529   | 3.765128041  |
| ENSG00000152213 | ARL11          | ADP-ribosylation factor-like 11 [Source:HGNC Symbol;Acc:24046]                                               | 1.178833221  | 4.211010055  | 7.365252226 | 0.006649627 | 0.047088648 | 3.270059802  | 3.408048696  | 3.599523466  | 4.81596796   | 4.990560977  |
| ENSG00000273066 | RP11-216L13.19 |                                                                                                              | 1.337198964  | 1.199656576  | 7.364549306 | 0.006652227 | 0.047088648 | 0.848890306  | 0.925936776  | 1.432844522  | 1.679439471  | 0.676839958  |
| ENSG00000164509 | IL31RA         | interleukin 31 receptor A [Source:HGNC Symbol;Acc:18969]                                                     | 1.637830248  | 1.177203543  | 7.362174388 | 0.006661019 | 0.047131879 | 0.796654307  | 0.689955027  | 0.210162819  | 2.106994346  | 1.134350211  |
| ENSG00000179397 | C1orf101       | chromosome 1 open reading frame 101 [Source:HGNC Symbol;Acc:28491]                                           | 1.422560513  | 0.185249923  | 7.359130146 | 0.006672306 | 0.047192723 | -0.046168491 | 0.056395802  | 0.28980717   | 0.114810932  | 0.139468177  |
| ENSG00000132470 | ITGB4          | integrin, beta 4 [Source:HGNC Symbol;Acc:6158]                                                               | -1.434396202 | 1.345867818  | 7.355262591 | 0.006686674 | 0.047256267 | 2.304339895  | 2.068117593  | -0.161352853 | -1.231517591 | 0.973207307  |
| ENSG00000175061 | FAM211A-AS1    | FAM211A antisense RNA 1 [Source:HGNC Symbol;Acc:28619]                                                       | -1.163828968 | 8.186586087  | 7.355523034 | 0.006685706 | 0.047256267 | 8.824219999  | 8.564105195  | 8.014408596  | 7.232878216  | 7.75287062   |
| ENSG00000257702 | LBX2-AS1       | LBX2 antisense RNA 1 [Source:HGNC Symbol;Acc:25136]                                                          | 1.358330496  | 1.919436653  | 7.35042267  | 0.006704699 | 0.047364585 | 1.531025871  | 1.050973916  | 1.89432737   | 2.491046607  | 2.120832889  |
| ENSG00000261996 | CTC-281F24.1   |                                                                                                              | 1.495877221  | 0.41714269   | 7.347814364 | 0.006714434 | 0.047395208 | -0.489407866 | 0.498306264  | 1.120696904  | 0.722650538  | -1.18885156  |
| ENSG00000143061 | IGSF3          | immunoglobulin superfamily, member 3 [Source:HGNC Symbol;Acc:5950]                                           | -1.401462209 | 1.004725071  | 7.344976241 | 0.006725042 | 0.04745101  | 1.883815937  | 1.997369264  | -0.99931534  | -0.406691783 | -0.376928291 |
| ENSG00000204632 | HLA-G          | major histocompatibility complex, class I, G [Source:HGNC Symbol;Acc:4964]                                   | 1.051900528  | 4.502240137  | 7.328995724 | 0.006785095 | 0.047836285 | 3.998873122  | 3.783314832  | 4.305306726  | 5.190971206  | 4.754122018  |
| ENSG00000105948 | TTC26          | tetratricopeptide repeat domain 26 [Source:HGNC Symbol;Acc:21882]                                            | -1.330606475 | 1.839178966  | 7.32651943  | 0.00679445  | 0.047883007 | 2.798442909  | 2.369639072  | 0.6928072    | 0.265774258  | 1.410986673  |
| ENSG00000117425 | PTCH2          | patched 2 [Source:HGNC Symbol;Acc:9586]                                                                      | 1.383549148  | 0.448712955  | 7.302763092 | 0.006884865 | 0.048500727 | 0.254194054  | 0.468724906  | 0.6928072    | 0.434658742  | 0.002986071  |
| ENSG00000169258 | GPRIN1         | G protein regulated inducer of neurite outgrowth 1 [Source:HGNC Symbol;Acc:24835]                            | 1.400363076  | 0.551438443  | 7.301219368 | 0.006890783 | 0.048522943 | 0.090278201  | 0.498306264  | 0.505333341  | 0.669468625  | 0.646616095  |
| ENSG00000177096 | FAM109B        | family with sequence similarity 109, member B [Source:HGNC Symbol;Acc:27161]                                 | -1.124077846 | 3.066512988  | 7.297885336 | 0.006903581 | 0.048592364 | 3.701474281  | 3.541909135  | 1.956663165  | 2.404187718  | 2.956635145  |
| ENSG00000157657 | ZNF618         | zinc finger protein 618 [Source:HGNC Symbol;Acc:29416]                                                       | -1.094603082 | 3.373908118  | 7.297209782 | 0.006906178 | 0.048592364 | 3.878388807  | 3.847931966  | 2.213098418  | 2.756300061  | 3.465217709  |

|                 |               |                                                                                           |              |              |             |             |             |              |             |              |              |             |
|-----------------|---------------|-------------------------------------------------------------------------------------------|--------------|--------------|-------------|-------------|-------------|--------------|-------------|--------------|--------------|-------------|
| ENSG00000214651 | RP11-477J21.2 |                                                                                           | 1.012560304  | 5.086389828  | 7.295696026 | 0.006911999 | 0.048594368 | 4.154846016  | 4.796364522 | 4.976862123  | 5.604456613  | 5.454673912 |
| ENSG00000153291 | SLC25A27      | solute carrier family 25, member 27<br>[Source:HGNC Symbol;Acc:21065]                     | 1.482088027  | -0.151892453 | 7.296393361 | 0.006909317 | 0.048594368 | -0.425964666 | 0.171040209 | 0.125863448  | -0.244792505 | -1.3021922  |
| ENSG00000136541 | ERMN          | ermin, ERM-like protein [Source:HGNC<br>Symbol;Acc:29208]                                 | 1.247885933  | 2.1950465    | 7.293006748 | 0.006922353 | 0.048647679 | 1.414540624  | 2.135558076 | 2.867077005  | 2.460063232  | 1.463945021 |
| ENSG00000168769 | TET2          | tet methylcytosine dioxygenase 2<br>[Source:HGNC Symbol;Acc:25941]                        | 1.028380859  | 6.849144786  | 7.278392716 | 0.006978895 | 0.048986208 | 5.904283452  | 6.306201362 | 6.673926768  | 7.570458388  | 7.179635047 |
| ENSG00000258461 | RP11-164J13.1 |                                                                                           | 1.324417261  | 1.173071866  | 7.279096357 | 0.006976162 | 0.048986208 | 0.534915169  | 1.050973916 | 1.501363361  | 1.048430793  | 1.374569317 |
| ENSG00000164611 | PTTG1         | pituitary tumor-transforming 1<br>[Source:HGNC Symbol;Acc:9690]                           | -1.359789916 | 1.986153267  | 7.263492115 | 0.007037033 | 0.049335107 | 2.811663962  | 2.747648049 | 0.328039018  | 1.224680533  | 1.11240278  |
| ENSG00000198478 | SH3BGL2       | SH3 domain binding glutamic acid-rich<br>protein like 2 [Source:HGNC<br>Symbol;Acc:15567] | 1.087905207  | 4.901064046  | 7.259639153 | 0.007052146 | 0.049421326 | 4.104705577  | 4.573047022 | 4.610737206  | 5.554913634  | 5.196262588 |
| ENSG00000162949 | CAPN13        | calpain 13 [Source:HGNC Symbol;Acc:16663]                                                 | 1.416328086  | 0.201575975  | 7.252661454 | 0.007079601 | 0.049574148 | -0.14487434  | 0.171040209 | 0.125863448  | -0.009775356 | 0.450630967 |
| ENSG00000174137 | FAM53A        | family with sequence similarity 53, member<br>A [Source:HGNC Symbol;Acc:31860]            | 1.440356881  | 0.22552322   | 7.243546788 | 0.007115628 | 0.049786708 | 0.214927798  | 0.171040209 | -0.329705368 | 0.497040107  | 0.095393329 |
| ENSG00000092621 | PHGDH         | phosphoglycerate dehydrogenase<br>[Source:HGNC Symbol;Acc:8923]                           | -1.141456615 | 2.969086885  | 7.239957492 | 0.007129867 | 0.049866459 | 3.255620391  | 3.446494941 | 2.243421497  | 1.109604583  | 3.528738911 |
| ENSG00000232533 | AC093673.5    |                                                                                           | 1.419195322  | 3.348472576  | 7.238827901 | 0.007134354 | 0.04987797  | 2.438230535  | 2.854443549 | 2.532495892  | 4.119977163  | 3.889710441 |
